# Supplementary material for: Construction of atropisomeric benzoxepinone-embedded styrenes via intramolecular [3+2] cycloaddition and catalytic kinetic resolution
Source: Royal Society of Chemistry journal article supplement (doi:10.1039/d4cc04394d), 2024-01-01
Supplement: d4cc04394d1.pdf [file d4cc04394d1.pdf]

## Construction of atropisomeric benzoxepinone-embedded styrenes via intramolecular [3+2] cycloaddition and catalytic kinetic resolution

Yue Wang, Xingfu Wei, Aiqi Xue, Yue Huang, Jingping Qu and Baomin Wang\*

State Key Laboratory of Fine Chemicals, Department of Pharmaceutical Engineering, School of Chemical Engineering, Dalian University of Technology, Dalian 116024, P. R. China

Email: bmwang@dlut.edu.cn

### Content

|                                                                                       |      |
|---------------------------------------------------------------------------------------|------|
| 1. General information .....                                                          | S1   |
| 2. General procedure for ( <i>E</i> )- $\alpha$ -aryl enal derivatives <b>1</b> ..... | S1   |
| 3. Optimization of the reaction conditions.....                                       | S7   |
| 4. General procedure for ( $\pm$ )- <b>3/5</b> .....                                  | S9   |
| 5. General procedure for catalytic kinetic resolution of ( $\pm$ )- <b>3/5</b> .....  | S28  |
| 6. References.....                                                                    | S57  |
| 7. NMR spectra for compounds.....                                                     | S58  |
| 8. X-ray crystal structures of <b>3ba</b> and <b>5ba</b> .....                        | S129 |

## 1. General information

Unless otherwise noted, materials were purchased from commercial suppliers and used without further purification. Column chromatography was performed on silica gel (200~300 mesh). Diastereoisomeric ratios (dr) were determined by  $^1\text{H}$  NMR. Enantiomeric excesses (ee) were determined by HPLC using corresponding commercial chiral columns as stated at 30 °C with UV detector at 254 nm. Optical rotations were reported as follows:  $[\alpha]_D^T$  (c g/100 mL, solvent). All  $^1\text{H}$  NMR spectra were recorded on Bruker Avance II 400 MHz or Bruker Avance III 600 MHz.  $^{19}\text{F}$  NMR spectra were recorded on Bruker Avance II 376 MHz and Bruker Avance III 565 MHz.  $^{13}\text{C}$  NMR spectra were recorded on Bruker Avance II 101 MHz or Bruker Avance III 151 MHz with chemical shifts reported as ppm (in  $\text{CDCl}_3$ , TMS as internal standard). Data for  $^1\text{H}$  NMR are recorded as follows: chemical shift ( $\delta$ , ppm), multiplicity (s = singlet, d = doublet, t = triplet, m = multiplet, br = broad singlet, dd = double doublet, coupling constants in Hz, integration). HRMS (ESI) was obtained with a HRMS/MS instrument (LTQ Orbitrap XLTM).

3-Amino oxindole hydrochlorides **4** were prepared according to literature methods.<sup>[1]</sup> 4-Amino pyrazolone hydrochlorides **2** were prepared following the reported procedures.<sup>[2]</sup>

## 2. General procedure for (*E*)- $\alpha$ -aryl enal derivatives **1**

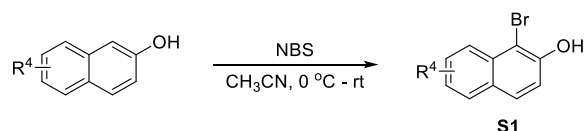

In an oven dried flask, 2-hydroxynaphthalene (1 equiv) was dissolved in  $\text{CH}_3\text{CN}$  (0.3 M). NBS (1 equiv) was added to the mixture at 0 °C. Then, the reaction mixture was gradually warmed up to room temperature and stirred. After the reaction was completed, the solvents were removed. The crude product was then purified by chromatography on silica gel (petroleum ether/ethyl acetate) to give **S1**.

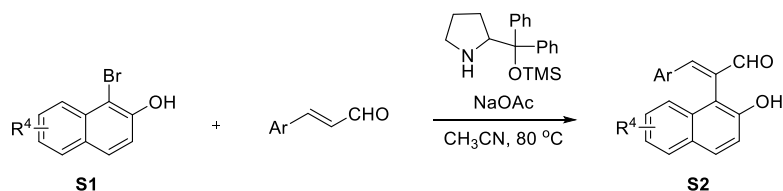

Compound **S2** was prepared according to the literature.<sup>[3]</sup> To a solution of **S1** (1.0 equiv), cinnamaldehyde (2.0 equiv) and NaOAc (4.0 equiv) in  $\text{CH}_3\text{CN}$  (0.2 M) was added diphenylprolinol TMS ether Cat. (0.1 equiv) under nitrogen atmosphere. Then

the reaction mixture was stirred at 80 °C. After the reaction was completed, the mixture was filtered and the filtrate was removed under reduced pressure. The crude product was added with EtOAc and washed with brine. The organic layer was dried with anhydrous Na<sub>2</sub>SO<sub>4</sub> and concentrated. The crude product was then purified by chromatography on silica gel (petroleum ether/ethyl acetate) to give **S2**.

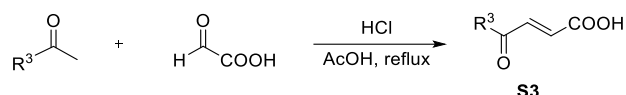

To a solution of methyl ketone (1 equiv) in the mixture of AcOH (0.25 M) and HCl (4 M) was added glyoxylic acid monohydrate (1.5 equiv). The solution was heated to reflux for 18 h. After the reaction was completed, the solvents were removed under reduced pressure. The crude product was then purified by chromatography on silica gel (petroleum ether/ethyl acetate) to give **S3**.

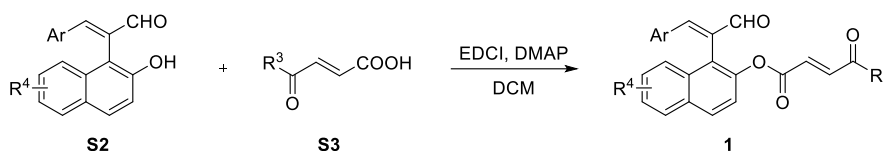

To a round-bottom flask with a magnetic stirring bar, **S3** (1.1 equiv), phenol (1 equiv), DMAP (5 mol%) and EDC·HCl (1.1 equiv) were added, and the resulting mixture was stirred in DCM (0.2 M) overnight at room temperature. After the reaction reached completion, H<sub>2</sub>O was added. The organic layer was then separated, and the aqueous layer was extracted with EtOAc. The organic layer was successively washed with brine. After drying over Na<sub>2</sub>SO<sub>4</sub>, the resulting solution was concentrated under reduced pressure. The crude mixture was purified by flash chromatography on silica gel with eluent of petroleum ether/ethyl acetate affording the corresponding pure compound **1**.

### Compound 1a

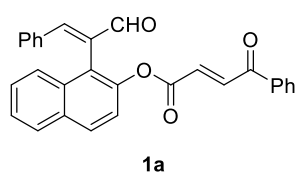

Yellow oil; <sup>1</sup>H NMR (600 MHz, CDCl<sub>3</sub>) δ 9.87 (s, 1H), 8.01 (d, *J* = 8.9 Hz, 1H), 7.95 (d, *J* = 7.4 Hz, 2H), 7.93 (d, *J* = 8.2 Hz, 1H), 7.89 (d, *J* = 15.5 Hz, 1H), 7.80 (s, 1H), 7.65-7.60 (m, 1H), 7.58 (d, *J* = 8.4 Hz, 1H), 7.53-7.47 (m, 3H), 7.45 (d, *J* = 8.9 Hz, 1H), 7.41-7.37 (m, 1H), 7.25-7.22 (m, 1H), 7.15-7.11 (m, 4H), 6.91 (d, *J* = 15.5 Hz, 1H); <sup>13</sup>C NMR (101 MHz, CDCl<sub>3</sub>) δ 192.7, 189.0, 163.4, 152.2, 145.9, 137.9, 136.4, 135.1, 134.1, 133.5, 132.0, 131.5, 131.2, 131.0, 130.7, 130.4, 129.0, 128.9, 128.7, 128.6, 127.3, 126.2, 124.9, 122.7, 121.4; HRMS (ESI) *m/z* Calcd. for C<sub>29</sub>H<sub>20</sub>NaO<sub>4</sub><sup>+</sup> ([M+Na]<sup>+</sup>) 455.1254, Found 455.1254.

### Compound 1b

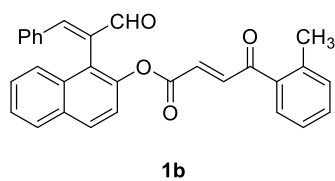

Orange solid; mp 72.2-72.9 °C;  $^1\text{H}$  NMR (400 MHz,  $\text{CDCl}_3$ )  $\delta$  9.85 (s, 1H), 7.98 (d,  $J = 8.9$  Hz, 1H), 7.91 (d,  $J = 8.1$  Hz, 1H), 7.80 (s, 1H), 7.61-7.51 (m, 3H), 7.49-7.34 (m, 4H), 7.31-7.24 (m, 2H), 7.24-7.19 (m, 1H), 7.14-7.07 (m, 4H), 6.72 (d,  $J = 15.7$  Hz, 1H), 2.49 (s, 3H);  $^{13}\text{C}$  NMR (151 MHz,  $\text{CDCl}_3$ )  $\delta$  193.2, 192.7, 163.5, 152.3, 145.9, 141.1, 138.9, 136.5, 135.0, 133.5, 132.2, 132.1, 132.0, 131.5, 131.2, 131.0, 130.7, 130.4, 129.5, 128.7, 128.6, 127.4, 126.2, 125.9, 124.9, 122.6, 121.4, 21.0; HRMS (ESI)  $m/z$  Calcd. for  $\text{C}_{30}\text{H}_{22}\text{NaO}_4^+$  ( $[\text{M}+\text{Na}]^+$ ) 469.1410, Found 469.1419.

### Compound 1c

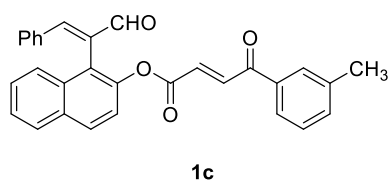

Orange oil;  $^1\text{H}$  NMR (600 MHz,  $\text{CDCl}_3$ )  $\delta$  9.87 (s, 1H), 8.00 (d,  $J = 8.9$  Hz, 1H), 7.93 (d,  $J = 8.2$  Hz, 1H), 7.89 (d,  $J = 15.5$  Hz, 1H), 7.82-7.77 (m, 2H), 7.74 (d,  $J = 7.6$  Hz, 1H), 7.58 (d,  $J = 8.4$  Hz, 1H), 7.50-7.36 (m, 5H), 7.25-7.22 (m, 1H), 7.17-7.10 (m, 4H), 6.91 (d,  $J = 15.5$  Hz, 1H), 2.43 (s, 3H);  $^{13}\text{C}$  NMR (151 MHz,  $\text{CDCl}_3$ )  $\delta$  192.7, 189.2, 163.5, 152.3, 145.9, 138.9, 138.1, 136.4, 135.1, 134.9, 133.5, 132.0, 131.5, 131.0, 131.0, 130.7, 130.4, 129.4, 128.9, 128.7, 128.6, 127.4, 126.2, 126.2, 124.9, 122.7, 121.4, 21.4; HRMS (ESI)  $m/z$  Calcd. for  $\text{C}_{30}\text{H}_{22}\text{NaO}_4^+$  ( $[\text{M}+\text{Na}]^+$ ) 469.1410, Found 469.1403.

### Compound 1d

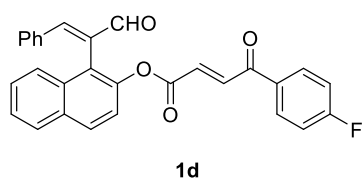

Light yellow solid; mp 79.3-79.8 °C;  $^1\text{H}$  NMR (600 MHz,  $\text{CDCl}_3$ )  $\delta$  9.86 (s, 1H), 8.02-7.97 (m, 3H), 7.93 (d,  $J = 8.2$  Hz, 1H), 7.86 (d,  $J = 15.5$  Hz, 1H), 7.80 (s, 1H), 7.58 (d,  $J = 8.4$  Hz, 1H), 7.50-7.47 (m, 1H), 7.45 (d,  $J = 8.9$  Hz, 1H), 7.41-7.36 (m, 1H), 7.26-7.24 (m, 1H), 7.20-7.16 (m, 2H), 7.14 (d,  $J = 4.4$  Hz, 4H), 6.92 (d,  $J = 15.5$  Hz, 1H);  $^{13}\text{C}$  NMR (151 MHz,  $\text{CDCl}_3$ )  $\delta$  192.7, 187.3, 166.3 (d,  $J = 256.7$  Hz), 163.3, 152.2, 145.9, 137.43, 135.0, 133.5, 132.8 (d,  $J = 3.0$  Hz), 132.0, 131.7 (d,  $J = 10.6$  Hz), 131.5, 131.4, 131.0, 130.7, 130.4, 128.7, 128.6, 127.4, 126.3, 124.9, 122.7, 121.3, 116.3 (d,  $J = 22.7$  Hz);  $^{19}\text{F}$  NMR (377 MHz,  $\text{CDCl}_3$ )  $\delta$  -102.89; HRMS (ESI)  $m/z$  Calcd. for  $\text{C}_{29}\text{H}_{19}\text{FNaO}_4^+$  ( $[\text{M}+\text{Na}]^+$ ) 473.1160, Found 473.1150.



### Compound 1e

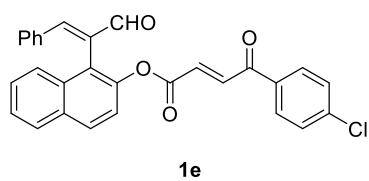

Yellow oil;  $^1\text{H}$  NMR (400 MHz,  $\text{CDCl}_3$ )  $\delta$  9.86 (s, 1H), 8.00 (d,  $J = 8.9$  Hz, 1H), 7.95-7.86 (m, 3H), 7.86-7.78 (m, 2H), 7.58 (d,  $J = 8.4$  Hz, 1H), 7.51-7.42 (m, 4H), 7.42-7.35 (m, 1H), 7.26-7.22 (m, 1H), 7.16-7.10 (m, 4H), 6.92 (d,  $J = 15.5$  Hz, 1H);  $^{13}\text{C}$  NMR (151 MHz,  $\text{CDCl}_3$ )  $\delta$  192.7, 187.7, 163.3, 152.2, 145.9, 140.7, 137.2, 135.0, 134.7, 133.5, 132.0, 131.7, 131.5, 131.0, 130.7, 130.4, 130.3, 129.4, 128.8, 128.6, 127.4, 126.3, 124.9, 122.7, 121.3; HRMS (ESI)  $m/z$  Calcd. for  $\text{C}_{29}\text{H}_{19}\text{ClNaO}_4^+$  ( $[\text{M}+\text{Na}]^+$ ) 489.0864, Found 489.0869.

### Compound 1f

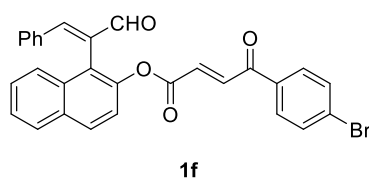

Light yellow solid; mp 97.2-97.8 °C;  $^1\text{H}$  NMR (400 MHz,  $\text{CDCl}_3$ )  $\delta$  9.86 (s, 1H), 8.00 (d,  $J = 8.9$  Hz, 1H), 7.92 (d,  $J = 8.2$  Hz, 1H), 7.86-7.77 (m, 4H), 7.64 (d,  $J = 8.5$  Hz, 2H), 7.58 (d,  $J = 8.4$  Hz, 1H), 7.50-7.42 (m, 2H), 7.41-7.36 (m, 1H), 7.25-7.21 (m, 1H), 7.16-7.09 (m, 4H), 6.92 (d,  $J = 15.5$  Hz, 1H);  $^{13}\text{C}$  NMR (151 MHz,  $\text{CDCl}_3$ )  $\delta$  192.7, 187.9, 163.3, 152.2, 145.9, 137.2, 135.1, 135.0, 133.5, 132.4, 132.0, 131.7, 131.5, 131.0, 130.7, 130.4, 130.3, 129.6, 128.8, 128.6, 127.4, 126.3, 124.9, 122.7, 121.3; HRMS (ESI)  $m/z$  Calcd. for  $\text{C}_{29}\text{H}_{19}\text{BrNaO}_4^+$  ( $[\text{M}+\text{Na}]^+$ ) 533.0359, Found 533.0350.

### Compound 1g

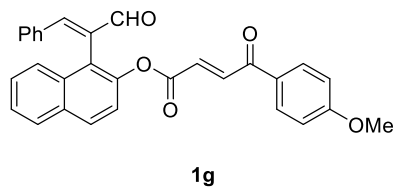

Yellow oil;  $^1\text{H}$  NMR (400 MHz,  $\text{CDCl}_3$ )  $\delta$  9.86 (s, 1H), 8.01-7.85 (m, 5H), 7.79 (s, 1H), 7.58 (d,  $J = 8.4$  Hz, 1H), 7.50-7.41 (m, 2H), 7.40-7.33 (m, 1H), 7.24-7.20 (m, 1H), 7.15-7.08 (m, 4H), 6.95 (d,  $J = 8.8$  Hz, 2H), 6.89 (d,  $J = 15.5$  Hz, 1H), 3.85 (s, 3H);  $^{13}\text{C}$  NMR (101 MHz,  $\text{CDCl}_3$ )  $\delta$  192.8, 187.1, 164.4, 163.6, 152.3, 146.0, 138.1, 135.1, 133.5, 132.0, 131.6, 131.4, 131.0, 130.7, 130.5, 130.3, 129.5, 128.7, 128.6, 127.3, 126.2, 125.0, 122.7, 121.5, 114.3, 55.6; HRMS (ESI)  $m/z$  Calcd. for  $\text{C}_{30}\text{H}_{23}\text{O}_5^+$  ( $[\text{M}+\text{H}]^+$ ) 463.1540, Found 463.1536.

### Compound 1h

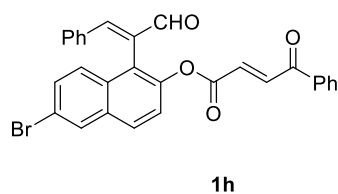

Light yellow solid; mp 91.2-92.0 °C;  $^1\text{H}$  NMR (400 MHz,  $\text{CDCl}_3$ )  $\delta$  9.86 (s, 1H), 8.07 (s, 1H), 7.94 (d,  $J = 7.5$  Hz, 2H), 7.91 (s, 1H), 7.88 (d,  $J = 6.0$  Hz, 1H), 7.80 (s, 1H), 7.65-7.58 (m, 1H), 7.54-7.40 (m, 5H), 7.27-7.23 (m, 1H), 7.18-7.08 (m, 4H), 6.91 (d,  $J = 15.5$  Hz, 1H);  $^{13}\text{C}$  NMR (101 MHz,  $\text{CDCl}_3$ )  $\delta$  192.4, 188.9, 163.3, 152.7, 146.2, 138.1, 136.3, 134.6, 134.1, 133.3, 133.1, 131.2, 131.0,

130.7, 130.6, 130.1, 129.4, 129.0, 128.9, 128.8, 126.8, 123.1, 122.7, 120.4; HRMS (ESI)  $m/z$  Calcd. for  $C_{29}H_{19}BrNaO_4^+$  ( $[M+Na]^+$ ) 533.0359, Found 533.0354.

### Compound 1i

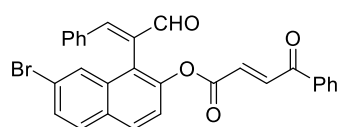

1i

Orange oil;  $^1H$  NMR (600 MHz,  $CDCl_3$ )  $\delta$  9.85 (s, 1H), 7.96-7.90 (m, 3H), 7.87 (d,  $J = 15.5$  Hz, 1H), 7.80 (s, 1H), 7.77-7.71 (m, 2H), 7.63-7.57 (m, 1H), 7.52 (dd,  $J = 8.7, 1.4$  Hz, 1H), 7.50-7.44 (m, 3H), 7.25 (dd,  $J = 12.1, 5.2$  Hz, 1H), 7.17-7.09 (m, 4H), 6.90 (d,  $J = 15.5$  Hz, 1H);  $^{13}C$  NMR (151 MHz,  $CDCl_3$ )  $\delta$  192.5, 188.9, 163.3, 153.0, 146.7, 138.1, 136.3, 134.5, 134.2, 133.3, 132.9, 131.2, 131.0, 130.7, 130.4, 130.3, 130.2, 129.7, 129.0, 128.9, 128.9, 127.2, 122.1, 122.0, 122.0; HRMS (ESI)  $m/z$  Calcd. for  $C_{29}H_{19}BrNaO_4^+$  ( $[M+Na]^+$ ) 533.0359, Found 533.0357.

### Compound 1j

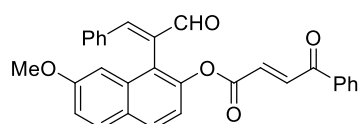

1j

Light yellow solid; mp 72.7-73.4 °C;  $^1H$  NMR (400 MHz,  $CDCl_3$ )  $\delta$  9.87 (s, 1H), 7.99-7.87 (m, 4H), 7.84-7.79 (m, 2H), 7.64 (m, 1H), 7.51 (m, 2H), 7.33-7.26 (m, 2H), 7.19-7.10 (m, 5H), 6.92 (d,  $J = 15.5$  Hz, 1H), 6.79 (s, 1H), 3.65 (s, 3H);  $^{13}C$  NMR (101 MHz,  $CDCl_3$ )  $\delta$  192.7, 189.0, 163.5, 158.8, 151.8, 146.7, 137.8, 136.4, 135.2, 134.1, 133.6, 132.9, 131.3, 131.0, 130.6, 130.2, 130.1, 129.0, 128.9, 128.7, 127.4, 121.4, 118.8, 118.8, 103.5, 55.2; HRMS (ESI)  $m/z$  Calcd. for  $C_{30}H_{23}O_5^+$  ( $[M+H]^+$ ) 463.1540, Found 463.1540.

### Compound 1k

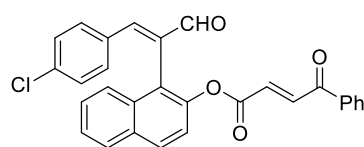

1k

Light yellow solid; mp 90.6-91.3 °C;  $^1H$  NMR (600 MHz,  $CDCl_3$ )  $\delta$  9.84 (s, 1H), 8.00 (d,  $J = 8.9$  Hz, 1H), 7.95 (d,  $J = 7.6$  Hz, 2H), 7.93-7.88 (m, 2H), 7.73 (s, 1H), 7.63-7.58 (m, 1H), 7.55 (d,  $J = 8.4$  Hz, 1H), 7.52-7.46 (m, 3H), 7.44 (d,  $J = 8.9$  Hz, 1H), 7.41-7.36 (m, 1H), 7.11-7.03 (m, 4H), 6.93 (d,  $J = 15.5$  Hz, 1H);  $^{13}C$  NMR (151 MHz,  $CDCl_3$ )  $\delta$  192.4, 188.9, 163.5, 150.4, 146.0, 138.0, 137.0, 136.3, 135.4, 134.2, 132.1, 131.9, 131.9, 131.3, 131.1, 130.6, 129.1, 129.0, 128.9, 128.7, 127.5, 126.4, 124.7, 122.4, 121.5; HRMS (ESI)  $m/z$  Calcd. for  $C_{29}H_{19}ClNaO_4^+$  ( $[M+Na]^+$ ) 489.0864, Found 489.0858.

### Compound 1l

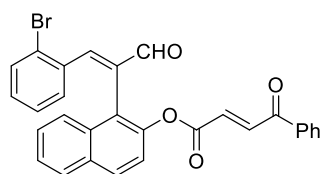

1l

Yellow solid; mp 93.4-94.2 °C;  $^1\text{H}$  NMR (600 MHz,  $\text{CDCl}_3$ )  $\delta$  9.96 (s, 1H), 8.14 (s, 1H), 8.01 (d,  $J = 8.0$  Hz, 2H), 7.95 (d,  $J = 2.3$  Hz, 1H), 7.93 (d,  $J = 9.2$  Hz, 1H), 7.89 (d,  $J = 8.1$  Hz, 1H), 7.67-7.62 (m, 1H), 7.59 (d,  $J = 8.3$  Hz, 1H), 7.57-7.51 (m, 3H), 7.50-7.42 (m, 2H), 7.37 (d,  $J = 8.9$  Hz, 1H), 7.08-7.04 (m, 1H), 6.98 (d,  $J = 15.5$  Hz, 1H), 6.87-6.81 (m, 2H);  $^{13}\text{C}$  NMR (151 MHz,  $\text{CDCl}_3$ )  $\delta$  192.4, 189.1, 163.5, 150.7, 146.0, 138.1, 136.9, 136.4, 134.1, 133.6, 133.0, 131.9, 131.8, 131.5, 131.2, 130.5, 130.3, 129.0, 129.0, 128.6, 127.4, 127.4, 126.2, 125.4, 124.9, 121.7, 121.3; HRMS (ESI)  $m/z$  Calcd. for  $\text{C}_{29}\text{H}_{19}\text{BrNaO}_4^+$  ( $[\text{M}+\text{Na}]^+$ ) 533.0359, Found 533.0350.

### Compound 1m

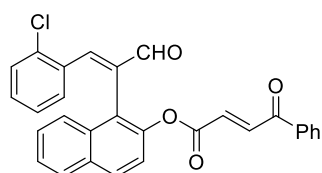

1m

Yellow oil;  $^1\text{H}$  NMR (400 MHz,  $\text{CDCl}_3$ )  $\delta$  9.95 (s, 1H), 8.21 (s, 1H), 8.02-7.98 (m, 2H), 7.97-7.87 (m, 3H), 7.67-7.61 (m, 1H), 7.59-7.34 (m, 7H), 7.17-7.11 (m, 1H), 6.95 (d,  $J = 15.6$  Hz, 1H), 6.86-6.82 (m, 1H), 6.81-6.75 (m, 1H);  $^{13}\text{C}$  NMR (101 MHz,  $\text{CDCl}_3$ )  $\delta$  192.4, 189.1, 163.4, 148.0, 146.0, 138.1, 137.0, 136.4, 135.0, 134.1, 131.9, 131.9, 131.7, 131.5, 131.1, 130.5, 130.1, 129.7, 129.0, 129.0, 128.6, 127.4, 126.8, 126.2, 124.9, 121.9, 121.3; HRMS (ESI)  $m/z$  Calcd. for  $\text{C}_{29}\text{H}_{20}\text{ClO}_4^+$  ( $[\text{M}+\text{H}]^+$ ) 467.1045, Found 467.1045.

### Compound 1n

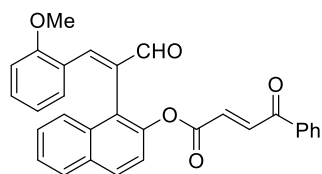

1n

Light yellow solid; mp 86.4-87.3 °C;  $^1\text{H}$  NMR (400 MHz,  $\text{CDCl}_3$ )  $\delta$  9.90 (s, 1H), 8.30 (s, 1H), 8.01-7.85 (m, 5H), 7.67-7.57 (m, 2H), 7.56-7.44 (m, 3H), 7.41 (d,  $J = 8.8$  Hz, 2H), 7.23-7.18 (m, 1H), 6.89 (d,  $J = 15.5$  Hz, 1H), 6.82 (d,  $J = 8.3$  Hz, 1H), 6.76-6.71 (m, 1H), 6.51-6.45 (m, 1H), 3.82 (s, 3H);  $^{13}\text{C}$  NMR (101 MHz,  $\text{CDCl}_3$ )  $\delta$  193.0, 189.2, 163.3, 158.1, 147.3, 145.7, 137.6, 136.5, 134.7, 134.1, 132.5, 132.0, 131.8, 131.4, 130.0, 129.8, 129.0, 128.9, 128.5, 127.2, 126.1, 125.2, 123.0, 122.6, 121.4, 120.5, 110.6, 55.6; HRMS (ESI)  $m/z$  Calcd. for  $\text{C}_{30}\text{H}_{23}\text{O}_5^+$  ( $[\text{M}+\text{H}]^+$ ) 463.1540, Found 463.1539.

### 3. Optimization of the reaction conditions

**Table S1. Optimization of the reaction conditions**

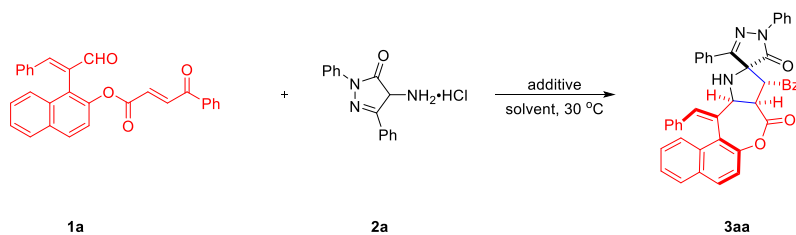

| Entry <sup>a</sup> | Additive                        | Solvent           | t [h]     | dr <sup>c</sup> | Yield [%] <sup>b</sup> |
|--------------------|---------------------------------|-------------------|-----------|-----------------|------------------------|
| 1                  | 3 Å MS                          | toluene           | 24        | >20:1           | 48                     |
| 2                  | 3 Å MS                          | DCE               | 15        | >20:1           | 58                     |
| 3                  | 3 Å MS                          | CHCl <sub>3</sub> | 24        | >20:1           | 62                     |
| 4                  | 3 Å MS                          | DCM               | 12        | >20:1           | 78                     |
| 5                  | 3 Å MS                          | THF               | 15        | >20:1           | 36                     |
| 6                  | 3 Å MS                          | Et <sub>2</sub> O | 24        | >20:1           | 30                     |
| 7                  | 3 Å MS                          | EtOH              | 24        | -               | trace                  |
| 8                  | -                               | DCM               | 48        | >20:1           | 45                     |
| <b>9</b>           | <b>4 Å MS</b>                   | <b>DCM</b>        | <b>10</b> | <b>&gt;20:1</b> | <b>85</b>              |
| 10                 | 5 Å MS                          | DCM               | 10        | >20:1           | 72                     |
| 11                 | Na <sub>2</sub> SO <sub>4</sub> | DCM               | 10        | >20:1           | 69                     |
| 12                 | MgSO <sub>4</sub>               | DCM               | 10        | >20:1           | 50                     |
| 13 <sup>d</sup>    | 4 Å MS                          | DCM               | 6         | >20:1           | 75                     |
| 14 <sup>e</sup>    | 4 Å MS                          | DCM               | 12        | >20:1           | 80                     |
| 15 <sup>f</sup>    | 4 Å MS                          | DCM               | 10        | >20:1           | 79                     |

<sup>a</sup>Unless otherwise noted, the reaction was carried out on a 0.1 mmol scale in solvent (1.0 mL) at 30 °C under nitrogen, and the ratio of **2a/1a** was 1.3:1. <sup>b</sup>Isolated yield. <sup>c</sup>The dr was determined by <sup>1</sup>H NMR of the crude products. <sup>d</sup>In 0.5 mL DCM. <sup>e</sup>In 2.0 mL DCM. <sup>f</sup>Na<sub>2</sub>CO<sub>3</sub> (1.3 equiv.) was added.

**Table S2. Preliminary asymmetric reaction**

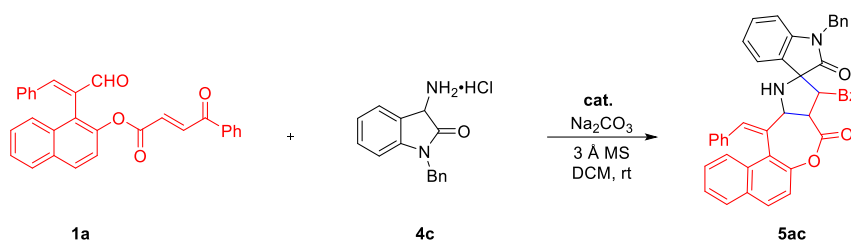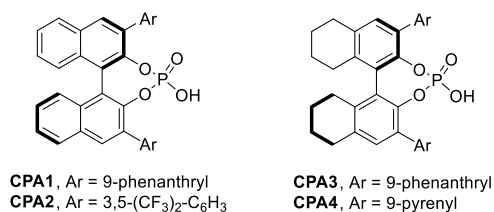

| Entry <sup>a</sup> | Cat.        | Solvent | t [h] | Yield [%] <sup>b</sup> | dr <sup>c</sup> | ee [%] <sup>d</sup> |
|--------------------|-------------|---------|-------|------------------------|-----------------|---------------------|
| 1                  | <b>CPA1</b> | DCM     | 48    | 76                     | >20:1           | 0                   |
| 2                  | <b>CPA2</b> | DCM     | 48    | 60                     | >20:1           | 0                   |
| 3                  | <b>CPA3</b> | DCM     | 48    | 62                     | >20:1           | 11                  |
| 4                  | <b>CPA4</b> | DCM     | 48    | 78                     | >20:1           | 5                   |
| 5 <sup>e</sup>     | <b>CPA3</b> | DCM     | 48    | 87                     | >20:1           | 0                   |

<sup>a</sup> The reaction was carried out on a 0.1 mmol scale with 3 Å MS (100 mg), **CPA** (10 mol%) in 1.0 mL solvent at room temperature under nitrogen, and the ratio of **4c/1a** was 1.5/1. <sup>b</sup> Isolated yield. <sup>c</sup> The dr was determined by <sup>1</sup>H NMR of the crude reaction mixture. <sup>d</sup> The ee was determined by chiral HPLC. <sup>e</sup> **2a** was used instead of **4c**.

**Table S3. Optimization of the KR reaction conditions**

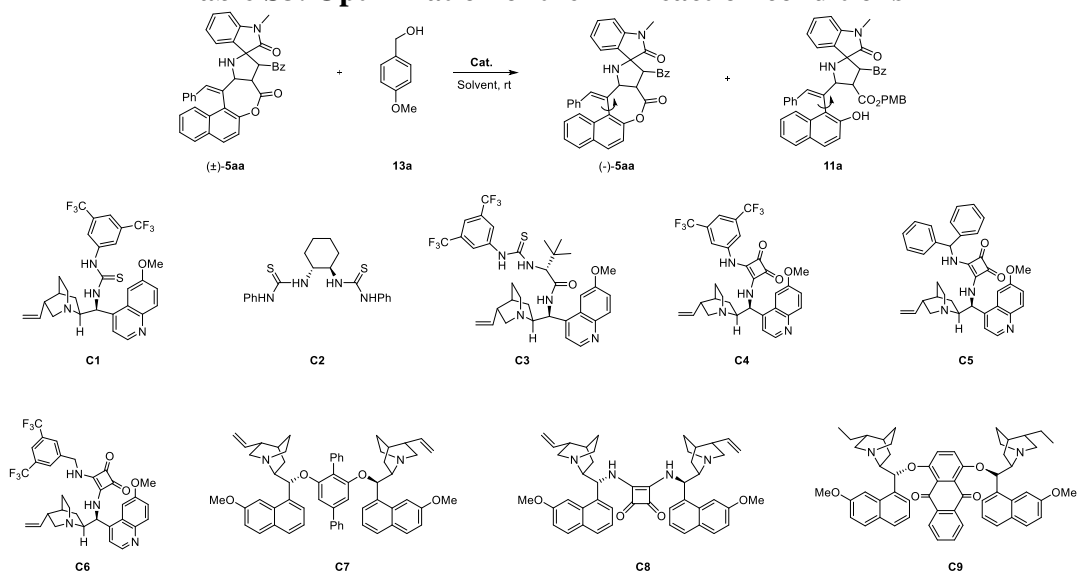

| Entry <sup>a</sup> | Cat.      | Solvent           | (-)- <b>5aa</b>        |                     | <b>11a</b>             |                     | C [%] <sup>d</sup> | s <sup>e</sup> |
|--------------------|-----------|-------------------|------------------------|---------------------|------------------------|---------------------|--------------------|----------------|
|                    |           |                   | yield [%] <sup>b</sup> | ee [%] <sup>c</sup> | yield [%] <sup>b</sup> | ee [%] <sup>c</sup> |                    |                |
| 1                  | <b>C1</b> | DCM               | 52                     | 53                  | 42                     | 43                  | 55                 | 4              |
| 2                  | <b>C2</b> | DCM               | quant.                 | -                   | NR                     | -                   | -                  | -              |
| 3                  | <b>C3</b> | DCM               | > 95                   | -                   | Trace                  | -                   | -                  | -              |
| 4                  | <b>C4</b> | DCM               | 52                     | 82                  | 44                     | 92                  | 47                 | 61             |
| 5                  | <b>C5</b> | DCM               | 65                     | 31                  | 30                     | 85                  | 27                 | 17             |
| 6                  | <b>C6</b> | DCM               | 44                     | 77                  | 42                     | 93                  | 45                 | 64             |
| 7                  | <b>C7</b> | DCM               | > 95                   | 6                   | Trace                  | -                   | -                  | -              |
| 8                  | <b>C8</b> | DCM               | quant.                 | -                   | NR                     | -                   | -                  | -              |
| 9                  | <b>C9</b> | DCM               | quant.                 | -                   | NR                     | -                   | -                  | -              |
| 10                 | <b>C4</b> | DCE               | 44                     | 43                  | 31                     | 91                  | 32                 | 32             |
| 11                 | <b>C4</b> | CHCl <sub>3</sub> | 48                     | 57                  | 37                     | 95                  | 38                 | 69             |
| 12                 | <b>C4</b> | toluene           | > 95                   | 10                  | Trace                  | -                   | -                  | -              |
| 13                 | <b>C4</b> | THF               | quant.                 | -                   | NR                     | -                   | -                  | -              |
| 14 <sup>f</sup>    | <b>C4</b> | DCM               | 50                     | 83                  | 42                     | 93                  | 47                 | 72             |
| 15 <sup>g</sup>    | <b>C4</b> | DCM               | 53                     | 87                  | 46                     | 95                  | 48                 | 111            |
| 16 <sup>h</sup>    | <b>C4</b> | DCM               | 56                     | 69                  | 40                     | 95                  | 42                 | 81             |
| 17 <sup>g,i</sup>  | <b>C4</b> | DCM               | 44                     | 83                  | 54                     | 53                  | 61                 | 8              |
| 18 <sup>g,j</sup>  | <b>C4</b> | DCM               | 56                     | 77                  | 42                     | 89                  | 46                 | 40             |

<sup>a</sup> The reaction was conducted with (±)-**5aa** (0.12 mmol), **13a** (0.1 mmol) and **Cat.** (10 mol%) in solvent (1.0 mL). <sup>b</sup> Isolated yield. <sup>c</sup> Detected by chiral HPLC analysis. <sup>d</sup> Conversion (C) = ee<sub>s</sub>/ (ee<sub>s</sub> + ee<sub>p</sub>). <sup>e</sup>  $s = \ln [(1-C) (1-ee_s)] / \ln [(1-C) (1+ee_s)]$ . <sup>f</sup> The ratio of (±)-**5aa**: **13a** = 1.5:1. <sup>g</sup> The ratio of (±)-**5aa**: **13a** = 1:1. <sup>h</sup> The ratio of (±)-**5aa**: **13a** = 0.5:1. <sup>i</sup> With Na<sub>2</sub>CO<sub>3</sub> (0.1 mmol). <sup>j</sup> With Et<sub>3</sub>N (0.1 mmol).

#### 4. General procedure for (±)-**3/5**

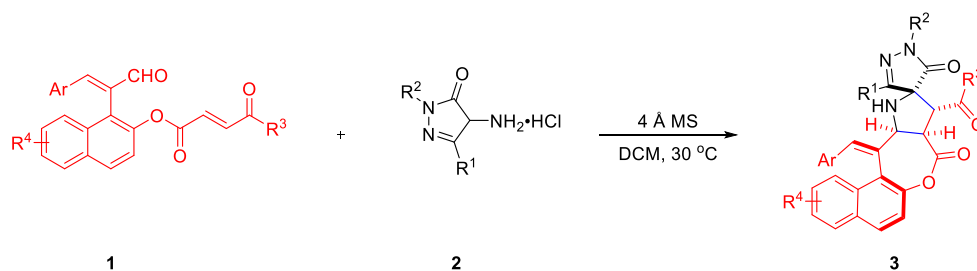

In a Schlenk tube, 4-amino pyrazolone hydrochloride **2** (0.26 mmol), 4 Å MS (200

mg) and 1-enal Naphthyl-3-benzoylacrylate **1** (0.2 mmol) were added into DCM (2 mL) under nitrogen atmosphere. The reaction solution was stirred at 30 °C. After the reaction was completed (monitored by TLC), the crude product was purified by column chromatography (ethyl acetate/petroleum ether = 1/20 to 1/10) on silica gel to give the product **3**.

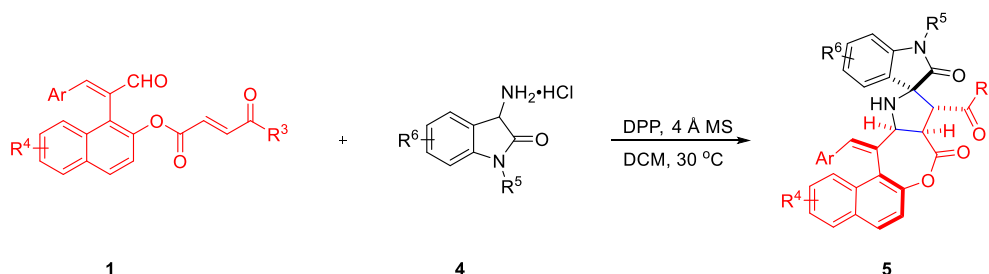

In a Schlenk tube, 3-amino oxindole hydrochloride **4** (0.26 mmol), 4 Å MS (200 mg), 1-enal Naphthyl-3-benzoylacrylate **1** (0.2 mmol) and DPP (0.02 mmol) were added into DCM (2 mL) under nitrogen atmosphere. The reaction solution was stirred at 30 °C. After the reaction was completed (monitored by TLC), the crude product was purified by column chromatography (ethyl acetate/petroleum ether = 1/10 to 1/5) on silica gel to give the product **5**.

### The scale-up reactions

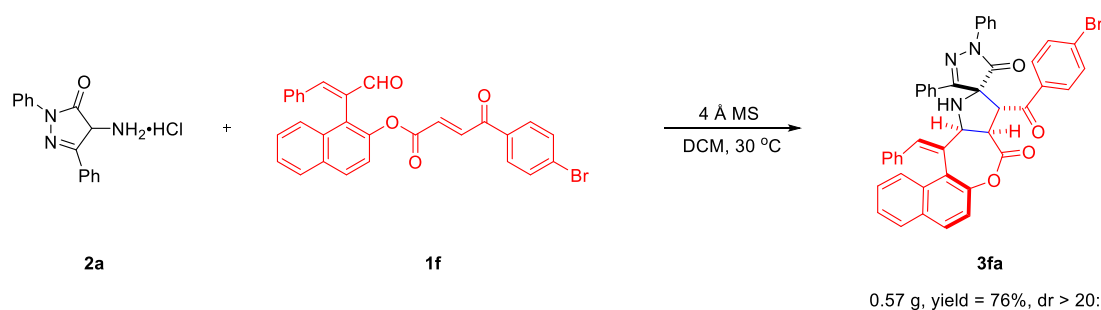

In a Schlenk tube, 4-amino pyrazolone hydrochloride **2a** (1.3 mmol), 4 Å MS (1000 mg) and 1-enal Naphthyl-3-benzoylacrylate **1f** (1.0 mmol) were added into DCM (10 mL) under nitrogen atmosphere. The reaction solution was stirred at 30 °C. After the reaction was completed (monitored by TLC), the crude product was purified by column chromatography (ethyl acetate/petroleum ether = 1/20 to 1/10) on silica gel to give the product **3fa**.

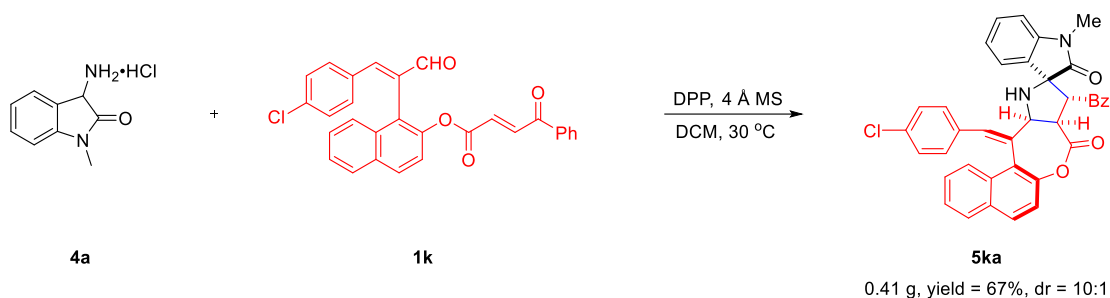

In a Schlenk tube, 3-amino oxindole hydrochloride **4a** (1.3 mmol), 4 Å MS (1000 mg), 1-enal Naphthyl-3-benzoylacrylate **1k** (1.0 mmol) and DPP (0.1 mmol) were added into DCM (10 mL) under nitrogen atmosphere. The reaction solution was stirred at 30 °C. After the reaction was completed (monitored by TLC), the crude product was purified by column chromatography (ethyl acetate/petroleum ether = 1/10 to 1/5) on silica gel to give the product **5ka**.

## Synthetic transformations

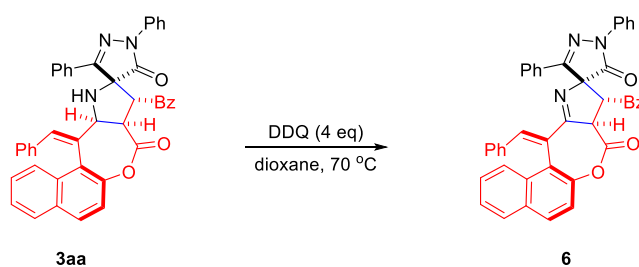

A reaction tube was charged with **3aa** (1.0 equiv, 0.1 mmol) and dioxane (1 mL), and then DDQ (4.0 equiv, 0.4 mmol) was added. The reaction was stirred at 70 °C until it was completed (monitored by TLC), then the crude product was purified by column chromatography (ethyl acetate/petroleum ether = 1/10) on silica gel to give the product **6** as a white solid in 82% yield.

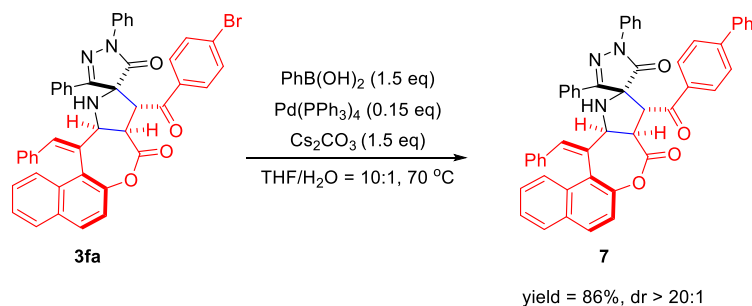

To a solution of **3fa** (1.0 equiv, 0.1 mmol) in 2.0 mL THF/H<sub>2</sub>O (10:1) was added phenylboronic acid (1.5 equiv, 0.15 mmol), Pd(PPh<sub>3</sub>)<sub>4</sub> (0.15 equiv, 0.015 mmol), Cs<sub>2</sub>CO<sub>3</sub> (1.5 equiv, 0.15 mmol). Then, the reaction system was degassed and filled with nitrogen for three times. The reaction mixture was stirred under N<sub>2</sub> at 70 °C for 8



h. After that, the reaction was washed with H<sub>2</sub>O and extracted with EA. The combined organic phase was washed with bine and dried with anhydrous Na<sub>2</sub>SO<sub>4</sub>. Then the solvent was removed under reduced pressure. The crude residue was purified by silica gel column chromatography to afford pure product **7** as a yellow solid in 86% yield.

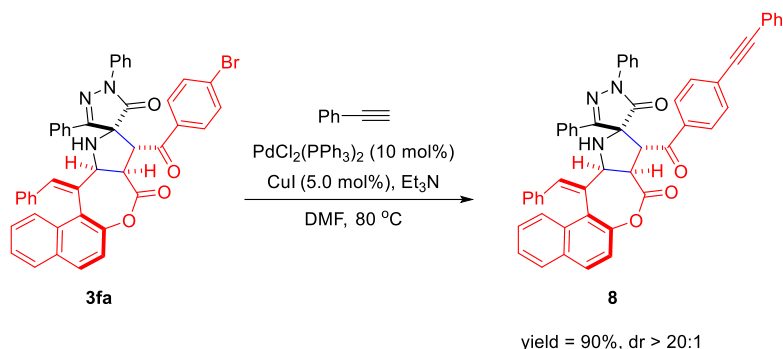

To a solution of **3fa** (1.0 equiv, 0.1 mmol), Et<sub>3</sub>N (0.07 mL) in 1.0 mL DMF was added ethynylbenzene (2.5 equiv, 0.25 mmol), CuI (5.0 mol%), PdCl<sub>2</sub>(PPh<sub>3</sub>)<sub>2</sub> (10 mol%). Then, the reaction system was degassed and filled with nitrogen for three times. The reaction mixture was stirred under N<sub>2</sub> at 80 °C for 4 h. After that, the reaction was washed with H<sub>2</sub>O and extracted with EA. The combined organic phase was washed with bine and dried with anhydrous Na<sub>2</sub>SO<sub>4</sub>. Then the solvent was removed under reduced pressure. The crude residue was purified by silica gel column chromatography to afford pure product **8** as a yellow solid in 90% yield.

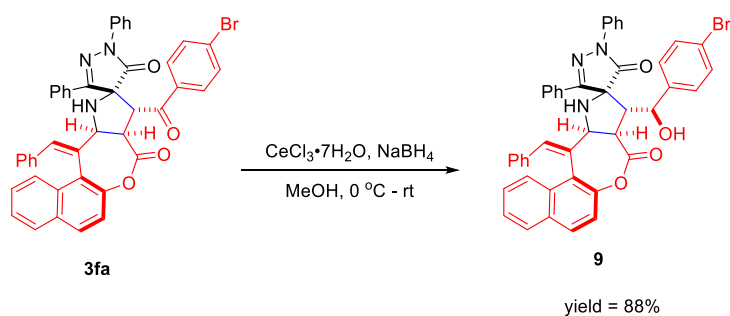

To a solution of **3fa** (1.0 equiv, 0.1 mmol) in MeOH (2.0 mL) was added sodium borohydride (1.2 equiv, 0.12 mmol) and CeCl<sub>3</sub>·7H<sub>2</sub>O (1.2 equiv, 0.12 mmol) at 0 °C for 12 h. The product was purified by silica gel column chromatography to give **9** as white solid in 88 % yield.

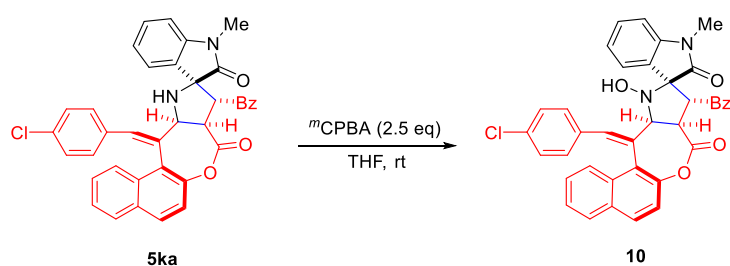

A reaction tube was charged with **5ka** (1.0 equiv, 0.1 mmol) and THF (1 mL), then *m*-CPBA (2.5 equiv, 0.25 mmol) was added. The reaction was stirred at room temperature until it was completed (monitored by TLC), then the crude product was purified by column chromatography (ethyl acetate/petroleum ether = 1/10) on silica gel to give the product **10** as a white solid in 93% yield.

## Characterization Data

### Compound 3aa

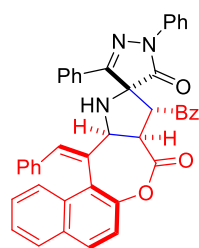

**3aa**

White solid, 85% yield, 113.2 mg; mp 156.7-157.3 °C; <sup>1</sup>H NMR (400 MHz, CDCl<sub>3</sub>) δ 8.38 (d, *J* = 6.8 Hz, 2H), 7.95 (d, *J* = 8.9 Hz, 1H), 7.89 (d, *J* = 8.2 Hz, 1H), 7.70 (d, *J* = 8.4 Hz, 1H), 7.64-7.57 (m, 3H), 7.53 (d, *J* = 8.2 Hz, 2H), 7.46-7.33 (m, 6H), 7.33-7.26 (m, 2H), 7.19-7.10 (m, 4H), 7.08-6.98 (m, 3H), 6.98-6.93 (m, 2H), 5.65-5.57 (m, 1H), 5.51 (d, *J* = 5.0 Hz, 1H), 4.53 (dd, *J* = 9.7, 5.0 Hz, 1H), 2.76 (d, *J* = 4.2 Hz, 1H); <sup>13</sup>C NMR (101 MHz, CDCl<sub>3</sub>) δ 195.7, 173.2, 170.9, 155.7, 147.2, 137.1, 136.3, 135.1, 133.5, 131.6, 131.2, 130.6, 130.4, 130.1, 129.5, 129.2, 128.8, 128.6, 128.5, 128.3, 128.2, 128.0, 127.8, 127.7, 127.3, 126.1, 125.5, 125.3, 124.6, 119.1, 118.9, 72.1, 65.6, 56.0, 47.3; HRMS (ESI) *m/z* Calcd. for C<sub>44</sub>H<sub>32</sub>N<sub>3</sub>O<sub>4</sub><sup>+</sup> ([M+H]<sup>+</sup>) 666.2387, Found 666.2379.

### Compound 3ab

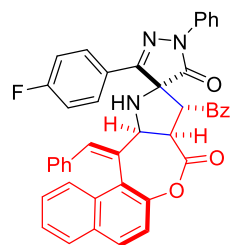

**3ab**

White solid, 82% yield, 112.1 mg; mp 260.4-261.3 °C; <sup>1</sup>H NMR (600 MHz, CDCl<sub>3</sub>) δ 8.40 (dd, *J* = 8.6, 5.4 Hz, 2H), 7.97 (d, *J* = 8.9 Hz, 1H), 7.90 (d, *J* = 8.2 Hz, 1H), 7.70 (d, *J* = 8.4 Hz, 1H), 7.53 (d, *J* = 7.9 Hz, 2H), 7.48-7.39 (m, 5H), 7.38-7.34 (m, 1H), 7.33-7.28 (m, 4H), 7.21-7.14 (m, 3H), 7.10-7.01 (m, 4H), 6.96 (d, *J* = 7.5 Hz, 2H), 5.67-5.59 (m, 1H), 5.46 (d, *J* = 4.9 Hz, 1H), 4.51 (dd, *J* = 9.7, 4.9 Hz, 1H), 2.78 (d, *J* = 3.9 Hz, 1H); <sup>13</sup>C NMR (101 MHz, CDCl<sub>3</sub>) δ 195.6, 173.1, 171.0, 164.5 (d, *J* = 253.5 Hz), 154.9, 147.2, 137.0, 136.3, 135.0, 133.6, 131.6, 130.7, 130.3, 130.1, 129.7, 129.6, 128.8, 128.7, 128.5, 128.3, 128.2 (d, *J* = 2.0 Hz), 128.0, 127.8, 127.7, 126.2, 125.7 (d, *J* = 4.0 Hz), 125.5, 125.3, 124.6, 119.1, 118.9, 116.4 (d, *J* = 22.2 Hz), 72.0, 65.7, 56.0, 47.2; <sup>19</sup>F NMR (377 MHz, CDCl<sub>3</sub>) δ -107.70; HRMS (ESI) *m/z* Calcd. for C<sub>44</sub>H<sub>31</sub>FN<sub>3</sub>O<sub>4</sub><sup>+</sup> ([M+H]<sup>+</sup>) 684.2293, Found 684.2291.

### Compound 3ac

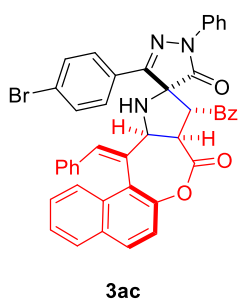

White solid, 78% yield, 116.2 mg; mp 280.2-280.9 °C; <sup>1</sup>H NMR (400 MHz, CDCl<sub>3</sub>) δ 8.38 (dd, *J* = 7.3, 2.2 Hz, 2H), 7.95 (d, *J* = 8.9 Hz, 1H), 7.89 (d, *J* = 8.2 Hz, 1H), 7.69 (d, *J* = 8.4 Hz, 1H), 7.64-7.58 (m, 3H), 7.53 (d, *J* = 7.9 Hz, 2H), 7.47-7.39 (m, 4H), 7.36 (d, *J* = 8.5 Hz, 1H), 7.33-7.27 (m, 2H), 7.19-7.10 (m, 4H), 7.07-6.99 (m, 3H), 6.98-6.93 (m, 2H), 5.67-5.56 (m, 1H), 5.51 (d, *J* = 5.1 Hz, 1H), 4.52 (dd, *J* = 9.7, 5.1 Hz, 1H), 2.77 (d, *J* = 4.3 Hz, 1H); <sup>13</sup>C NMR (126 MHz, CDCl<sub>3</sub>) δ 195.6, 173.2, 170.8, 155.7, 147.3, 137.2, 136.4, 135.1, 133.5, 131.6, 131.2, 130.6, 130.4, 130.1, 129.5, 129.1, 128.8, 128.6, 128.5, 128.3, 128.2, 127.9, 127.7, 127.7, 127.3, 126.1, 125.4, 125.3, 124.6, 119.1, 118.9, 72.2, 65.6, 56.0, 47.4; HRMS (ESI) *m/z* Calcd. for C<sub>44</sub>H<sub>31</sub>BrN<sub>3</sub>O<sub>4</sub><sup>+</sup> ([M+H]<sup>+</sup>) 744.1492, Found 744.1490.

### Compound 3ad

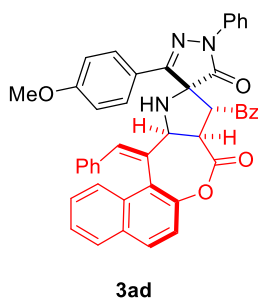

White solid, 80% yield, 111.3 mg; mp 269.4-270.3 °C; <sup>1</sup>H NMR (400 MHz, CDCl<sub>3</sub>) δ 8.34 (d, *J* = 8.6 Hz, 2H), 7.96 (d, *J* = 8.8 Hz, 1H), 7.89 (d, *J* = 8.1 Hz, 1H), 7.69 (d, *J* = 8.1 Hz, 1H), 7.51 (d, *J* = 7.9 Hz, 2H), 7.47-7.33 (m, 6H), 7.31-7.26 (m, 2H), 7.20-7.08 (m, 6H), 7.07-6.98 (m, 3H), 6.98-6.90 (m, 2H), 5.62 (d, *J* = 7.8 Hz, 1H), 5.48 (d, *J* = 4.7 Hz, 1H), 4.55 (dd, *J* = 9.4, 4.9 Hz, 1H), 3.93 (s, 3H), 2.74 (d, *J* = 3.4 Hz, 1H); <sup>13</sup>C NMR (101 MHz, CDCl<sub>3</sub>) δ 195.6, 173.0, 171.0, 162.0, 155.6, 147.2, 137.2, 136.3, 135.1, 133.5, 131.6, 130.6, 130.5, 130.1, 129.1, 128.8, 128.6, 128.5, 128.4, 128.3, 128.1, 127.9, 127.8, 127.7, 126.1, 125.3, 125.3, 124.6, 122.0, 119.1, 118.9, 114.6, 72.2, 65.8, 56.1, 55.5, 47.2; HRMS (ESI) *m/z* Calcd. for C<sub>45</sub>H<sub>34</sub>N<sub>3</sub>O<sub>5</sub><sup>+</sup> ([M+H]<sup>+</sup>) 696.2493, Found 696.2485.

### Compound 3ae

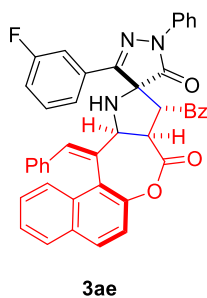

White solid, 73% yield, 99.8 mg; mp 277.8-278.5 °C; <sup>1</sup>H NMR (400 MHz, CDCl<sub>3</sub>) δ 8.24 (d, *J* = 7.7 Hz, 1H), 8.01 (d, *J* = 10.0 Hz, 1H), 7.95 (d, *J* = 8.8 Hz, 1H), 7.89 (d, *J* = 8.2 Hz, 1H), 7.69 (d, *J* = 8.3 Hz, 1H), 7.59 (dd, *J* = 14.4, 7.4 Hz, 1H), 7.52 (d, *J* = 7.9 Hz, 2H), 7.47-7.38 (m, 5H), 7.37-7.26 (m, 4H), 7.22-7.12 (m, 3H), 7.12-6.99 (m, 4H), 6.98-6.91 (m, 2H), 5.65-5.58 (m, 1H), 5.48 (d, *J* = 4.6 Hz, 1H), 4.50 (dd, *J* = 9.3, 4.9 Hz, 1H), 2.77 (d, *J* = 3.0 Hz, 1H); <sup>13</sup>C NMR (101 MHz, CDCl<sub>3</sub>) δ 195.6, 173.2, 170.9, 163.1 (d, *J* = 248.5 Hz), 154.6, 147.2, 137.0, 136.3, 135.0, 133.7, 131.6, 131.5 (d, *J* = 8.1 Hz), 131.0 (d, *J* = 8.1 Hz), 130.7,

130.2, 130.1, 128.8, 128.7, 128.5, 128.3, 128.3, 128.2, 128.0, 127.8, 127.8, 126.2, 125.7, 125.2, 124.6, 123.3 (d,  $J = 3.0$  Hz), 119.1, 118.9, 118.3 (d,  $J = 21.2$  Hz), 113.8 (d,  $J = 24.2$  Hz), 71.9, 65.7, 56.1, 47.2;  $^{19}\text{F}$  NMR (377 MHz,  $\text{CDCl}_3$ )  $\delta$  -110.92; HRMS (ESI)  $m/z$  Calcd. for  $\text{C}_{44}\text{H}_{31}\text{FN}_3\text{O}_4^+$  ( $[\text{M}+\text{H}]^+$ ) 684.2293, Found 684.2289.

### Compound 3af

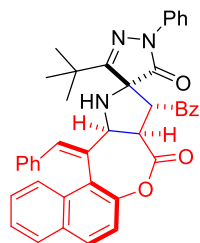

3af

White solid, 62% yield, 80.1 mg; mp 159.2-159.8 °C;  $^1\text{H}$  NMR (400 MHz,  $\text{CDCl}_3$ )  $\delta$  7.93 (d,  $J = 8.8$  Hz, 1H), 7.88 (d,  $J = 8.2$  Hz, 1H), 7.69 (d,  $J = 8.4$  Hz, 1H), 7.66-7.57 (m, 4H), 7.46 (dd,  $J = 17.8, 8.1$  Hz, 2H), 7.41-7.29 (m, 6H), 7.18-7.12 (m, 1H), 7.11-7.01 (m, 4H), 7.01-6.95 (m, 2H), 5.64 (d,  $J = 5.3$  Hz, 1H), 5.60-5.53 (m, 1H), 4.32 (dd,  $J = 9.7, 5.4$  Hz, 1H), 2.49 (d,  $J = 4.4$  Hz, 1H), 1.64 (s, 9H);  $^{13}\text{C}$  NMR (101 MHz,  $\text{CDCl}_3$ )  $\delta$  197.0, 173.5, 171.0, 166.3, 147.0, 137.5, 136.9, 135.0, 133.4, 131.6, 130.5, 130.4, 130.08, 128.8, 128.6, 128.5, 128.4, 128.3, 127.9, 127.8, 127.8, 127.7, 126.1, 125.2, 125.0, 124.6, 118.9, 118.5, 73.7, 65.2, 55.9, 48.1, 37.0, 29.4; HRMS (ESI)  $m/z$  Calcd. for  $\text{C}_{42}\text{H}_{36}\text{N}_3\text{O}_4^+$  ( $[\text{M}+\text{H}]^+$ ) 646.2700, Found 646.2696.

### Compound 3ag

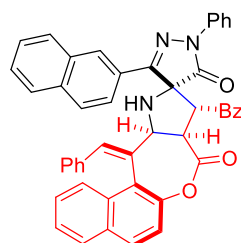

3ag

White solid, 72% yield, 103.1 mg; mp 198.1-198.9 °C;  $^1\text{H}$  NMR (400 MHz,  $\text{CDCl}_3$ )  $\delta$  9.14 (s, 1H), 8.28 (dd,  $J = 8.7, 1.4$  Hz, 1H), 8.06 (d,  $J = 7.9$  Hz, 1H), 8.01 (d,  $J = 8.8$  Hz, 1H), 7.99-7.88 (m, 3H), 7.72 (d,  $J = 8.3$  Hz, 1H), 7.64-7.52 (m, 4H), 7.48-7.28 (m, 8H), 7.19-7.09 (m, 4H), 7.08-6.99 (m, 3H), 6.99-6.91 (m, 2H), 5.71-5.60 (m, 2H), 4.60 (dd,  $J = 9.6, 4.9$  Hz, 1H), 2.84 (d,  $J = 4.3$  Hz, 1H);  $^{13}\text{C}$  NMR (101 MHz,  $\text{CDCl}_3$ )  $\delta$  195.6, 173.3, 171.2, 155.6, 147.2, 137.1, 136.3, 135.1, 134.5, 133.6, 133.3, 131.6, 130.7, 130.5, 130.2, 129.8, 128.9, 128.8, 128.8, 128.7, 128.5, 128.4, 128.3, 128.2, 127.9, 127.8, 127.8, 127.7, 127.0, 126.5, 126.2, 125.6, 125.3, 124.7, 123.2, 119.1, 119.0, 72.2, 66.1, 56.5, 47.5; HRMS (ESI)  $m/z$  Calcd. for  $\text{C}_{48}\text{H}_{34}\text{N}_3\text{O}_4^+$  ( $[\text{M}+\text{H}]^+$ ) 716.2544, Found 716.2537.

### Compound 3ah

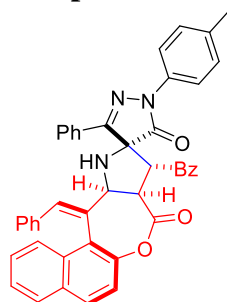

3ah

White solid, 68% yield, 92.4 mg; mp 172.5-173.2 °C;  $^1\text{H}$  NMR (400 MHz,  $\text{CDCl}_3$ )  $\delta$  8.41-8.32 (m, 2H), 7.95 (d,  $J = 8.9$  Hz, 1H), 7.88 (d,  $J = 8.1$  Hz, 1H), 7.70 (d,  $J = 8.4$  Hz, 1H), 7.65-7.54 (m, 3H), 7.47-7.29 (m, 8H), 7.21-7.07 (m, 5H), 7.06-6.90 (m, 5H), 5.61 (d,  $J = 7.7$  Hz, 1H), 5.50 (d,  $J = 5.0$  Hz, 1H), 4.54 (dd,  $J = 9.7, 5.0$  Hz, 1H), 2.75 (d,  $J = 4.1$  Hz, 1H), 2.30 (s, 3H);  $^{13}\text{C}$  NMR

(101 MHz, CDCl<sub>3</sub>)  $\delta$  195.6, 173.0, 170.9, 155.5, 147.2, 136.4, 135.3, 135.1, 134.7, 133.5, 131.6, 131.1, 130.6, 130.5, 130.1, 129.6, 129.2, 129.1, 128.8, 128.5, 128.3, 128.3, 128.2, 127.9, 127.8, 127.7, 127.3, 126.1, 125.3, 124.7, 119.1, 119.0, 72.1, 65.6, 55.9, 47.3, 21.0; HRMS (ESI)  $m/z$  Calcd. for C<sub>45</sub>H<sub>34</sub>N<sub>3</sub>O<sub>4</sub><sup>+</sup> ([M+H]<sup>+</sup>) 680.2544, Found 680.2539.

### Compound 3ai

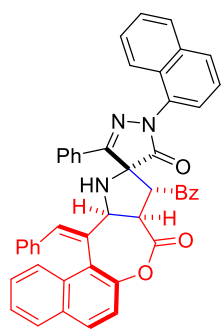

3ai

White solid, 71% yield, 101.6 mg; mp 262.3-262.9 °C; <sup>1</sup>H NMR (600 MHz, CDCl<sub>3</sub>)  $\delta$  8.47-8.42 (m, 2H), 8.07-8.03 (m, 1H), 7.99 (d,  $J$  = 8.9 Hz, 1H), 7.92 (d,  $J$  = 8.2 Hz, 1H), 7.83-7.77 (m, 3H), 7.75-7.69 (m, 2H), 7.68-7.61 (m, 3H), 7.51-7.41 (m, 6H), 7.41-7.36 (m, 2H), 7.18-7.12 (m, 3H), 7.10-7.02 (m, 3H), 7.01-6.96 (m, 2H), 5.68 (dd,  $J$  = 9.7, 2.0 Hz, 1H), 5.56 (d,  $J$  = 5.0 Hz, 1H), 4.57 (dd,  $J$  = 9.8, 5.0 Hz, 1H), 2.84 (d,  $J$  = 4.1 Hz, 1H); <sup>13</sup>C NMR (126 MHz, CDCl<sub>3</sub>)  $\delta$  195.7, 173.4, 170.9, 155.8, 147.2, 136.3, 135.1, 134.7, 133.5, 133.2, 131.6, 131.3, 131.2, 130.6, 130.4, 130.1, 129.5, 129.2, 128.8, 128.5, 128.3, 128.3, 128.2, 128.0, 127.9, 127.8, 127.7, 127.6, 127.4, 126.5, 126.1, 125.6, 125.3, 124.6, 119.1, 118.2, 116.3, 72.3, 65.7, 56.1, 47.3; HRMS (ESI)  $m/z$  Calcd. for C<sub>48</sub>H<sub>34</sub>N<sub>3</sub>O<sub>4</sub><sup>+</sup> ([M+H]<sup>+</sup>) 716.2544, Found 716.2538.

### Compound 3ba

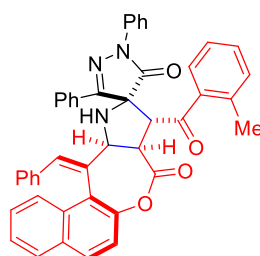

3ba

White solid, 80% yield, 108.8 mg; mp 193.5-194.4 °C; <sup>1</sup>H NMR (400 MHz, CDCl<sub>3</sub>)  $\delta$  8.35-8.28 (m, 2H), 7.98 (d,  $J$  = 8.9 Hz, 1H), 7.91 (d,  $J$  = 8.2 Hz, 1H), 7.71 (d,  $J$  = 8.3 Hz, 1H), 7.65-7.52 (m, 5H), 7.50-7.42 (m, 2H), 7.40-7.29 (m, 3H), 7.25-7.13 (m, 2H), 7.13-6.94 (m, 8H), 6.87 (d,  $J$  = 7.6 Hz, 1H), 5.55 (d,  $J$  = 8.0 Hz, 1H), 5.47 (d,  $J$  = 4.9 Hz, 1H), 4.57 (dd,  $J$  = 9.7, 5.0 Hz, 1H), 2.73 (d,  $J$  = 4.0 Hz, 1H), 2.04 (s, 3H); <sup>13</sup>C NMR (101 MHz, CDCl<sub>3</sub>)  $\delta$  197.1, 173.2, 170.9, 155.8, 147.3, 138.4, 137.2, 135.6, 135.1, 132.0, 131.6, 131.6, 131.2, 130.6, 130.4, 130.1, 129.5, 129.1, 128.8, 128.7, 128.6, 128.5, 128.3, 127.8, 127.8, 127.7, 127.3, 126.1, 125.4, 125.3, 124.7, 124.6, 119.2, 118.6, 71.6, 65.1, 57.4, 46.8, 19.8; HRMS (ESI)  $m/z$  Calcd. for C<sub>45</sub>H<sub>34</sub>N<sub>3</sub>O<sub>4</sub><sup>+</sup> ([M+H]<sup>+</sup>) 680.2544, Found 680.2544.

### Compound 3ca

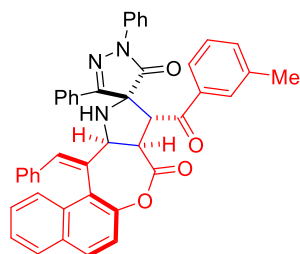

3ca

White solid, 78% yield, 106.0 mg; mp 189.1-189.7 °C; <sup>1</sup>H NMR (400 MHz, CDCl<sub>3</sub>)  $\delta$  8.40-8.32 (m, 2H), 7.94 (d,  $J$  = 8.9 Hz, 1H), 7.88 (d,  $J$  = 8.2 Hz, 1H), 7.69 (d,  $J$  = 8.4 Hz,

1H), 7.64-7.56 (m, 3H), 7.52 (d,  $J = 8.3$  Hz, 2H), 7.46-7.39 (m, 2H), 7.37-7.25 (m, 3H), 7.19-7.08 (m, 5H), 7.07-6.90 (m, 6H), 5.59 (d,  $J = 7.7$  Hz, 1H), 5.49 (d,  $J = 5.0$  Hz, 1H), 4.56 (dd,  $J = 9.7, 5.0$  Hz, 1H), 2.72 (d,  $J = 4.2$  Hz, 1H), 2.03 (s, 3H);  $^{13}\text{C}$  NMR (101 MHz,  $\text{CDCl}_3$ )  $\delta$  195.9, 173.2, 170.9, 155.6, 147.3, 138.3, 137.1, 136.5, 135.1, 134.2, 131.6, 131.2, 130.6, 130.5, 130.1, 129.5, 129.1, 128.8, 128.6, 128.5, 128.3, 128.0, 127.9, 127.8, 127.7, 127.3, 126.1, 125.4, 125.4, 125.3, 124.6, 119.2, 118.8, 72.2, 65.6, 56.1, 47.1, 20.9; HRMS (ESI)  $m/z$  Calcd. for  $\text{C}_{45}\text{H}_{33}\text{N}_3\text{NaO}_4^+$  ( $[\text{M}+\text{Na}]^+$ ) 702.2363, Found 702.2356.

### Compound 3da

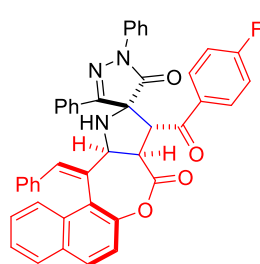

3da

White solid, 81% yield, 110.8 mg; mp 160.8-161.7 °C;  $^1\text{H}$  NMR (400 MHz,  $\text{CDCl}_3$ )  $\delta$  8.38 (d,  $J = 6.5$  Hz, 2H), 7.94 (d,  $J = 8.9$  Hz, 1H), 7.87 (d,  $J = 8.2$  Hz, 1H), 7.68 (d,  $J = 8.3$  Hz, 1H), 7.64-7.52 (m, 5H), 7.47-7.37 (m, 4H), 7.37-7.26 (m, 3H), 7.18-7.08 (m, 2H), 7.08-6.90 (m, 5H), 6.81 (t,  $J = 8.2$  Hz, 2H), 5.67-5.53 (m, 1H), 5.46 (d,  $J = 4.9$  Hz, 1H), 4.50 (dd,  $J = 9.5, 5.0$  Hz, 1H), 2.74 (d,  $J = 3.7$  Hz, 1H);  $^{13}\text{C}$  NMR (101 MHz,  $\text{CDCl}_3$ )  $\delta$  194.1, 173.1, 171.0, 165.9 (d,  $J = 256.5$  Hz), 155.6, 147.2, 137.1, 135.1, 132.7, 131.7, 131.4, 131.1, 131.0, 130.7, 130.3, 130.1, 129.4, 129.3, 128.8, 128.6, 128.4, 128.0, 127.9, 127.8, 127.3, 126.2, 125.7, 125.3, 124.6, 119.1, 118.7, 115.5 (d,  $J = 22.2$  Hz), 72.2, 65.7, 56.0, 47.4;  $^{19}\text{F}$  NMR (377 MHz,  $\text{CDCl}_3$ )  $\delta$  -103.66; HRMS (ESI)  $m/z$  Calcd. for  $\text{C}_{44}\text{H}_{31}\text{FN}_3\text{O}_4^+$  ( $[\text{M}+\text{H}]^+$ ) 684.2293, Found 684.2291.

### Compound 3ea

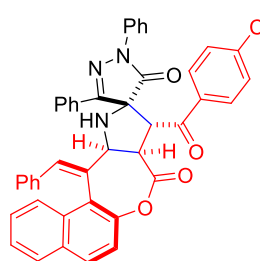

3ea

White solid, 75% yield, 105.0 mg; mp 165.9-166.9 °C;  $^1\text{H}$  NMR (600 MHz,  $\text{CDCl}_3$ )  $\delta$  8.42-8.36 (m, 2H), 7.94 (d,  $J = 8.8$  Hz, 1H), 7.88 (d,  $J = 8.2$  Hz, 1H), 7.69 (d,  $J = 8.4$  Hz, 1H), 7.64-7.56 (m, 3H), 7.54 (d,  $J = 7.8$  Hz, 2H), 7.46-7.39 (m, 2H), 7.36-7.28 (m, 5H), 7.18-7.08 (m, 4H), 7.07-6.98 (m, 3H), 6.97-6.89 (m, 2H), 5.63-5.54 (m, 1H), 5.44 (d,  $J = 5.0$  Hz, 1H), 4.49 (dd,  $J = 9.7, 5.0$  Hz, 1H), 2.75 (d,  $J = 4.1$  Hz, 1H);  $^{13}\text{C}$  NMR (101 MHz,  $\text{CDCl}_3$ )  $\delta$  194.5, 173.1, 170.8, 155.6, 147.2, 140.1, 137.0, 135.0, 134.6, 131.7, 131.4, 130.7, 130.3, 130.1, 129.7, 129.3, 128.8, 128.8, 128.5, 128.3, 128.0, 127.9, 127.8, 127.3, 126.2, 125.6, 125.3, 124.6, 119.1, 118.7, 72.1, 65.7, 56.0, 47.3; HRMS (ESI)  $m/z$  Calcd. for  $\text{C}_{44}\text{H}_{30}\text{ClN}_3\text{NaO}_4^+$  ( $[\text{M}+\text{Na}]^+$ ) 722.1817, Found 722.1810.

### Compound 3fa

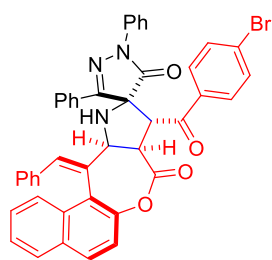

3fa

White solid, 80% yield, 119.1 mg; mp 233.2-233.9 °C;  $^1\text{H}$  NMR (400 MHz,  $\text{CDCl}_3$ )  $\delta$  8.41 (dd,  $J = 7.4, 2.1$  Hz, 2H), 7.98 (d,  $J = 8.9$  Hz, 1H), 7.91 (d,  $J = 8.2$  Hz, 1H), 7.72 (d,  $J = 8.4$  Hz, 1H), 7.67-7.59 (m, 3H), 7.56 (d,  $J = 7.9$  Hz, 2H), 7.49-7.43 (m, 2H), 7.40-7.27 (m, 7H), 7.21-7.12 (m, 2H), 7.10-7.01 (m, 3H), 7.00-6.93 (m, 2H), 5.68-5.58 (m, 1H), 5.46 (d,  $J = 5.1$  Hz, 1H), 4.58-4.42 (m, 1H), 2.79 (d,  $J = 4.3$  Hz, 1H);  $^{13}\text{C}$  NMR (101 MHz,  $\text{CDCl}_3$ )  $\delta$  194.7, 173.1, 170.8, 155.6, 147.2, 137.0, 135.0, 131.7, 131.5, 131.4, 130.7, 130.2, 130.1, 129.8, 129.3, 128.8, 128.8, 128.7, 128.5, 128.3, 128.0, 127.8, 127.8, 127.3, 126.2, 125.6, 125.3, 124.6, 119.1, 118.7, 72.1, 65.7, 56.0, 47.3; HRMS (ESI)  $m/z$  Calcd. for  $\text{C}_{44}\text{H}_{31}\text{BrN}_3\text{O}_4^+$  ( $[\text{M}+\text{H}]^+$ ) 744.1492, Found 744.1484.

### Compound 3ga

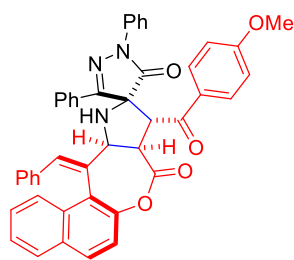

3ga

White solid, 85% yield, 118.3 mg; mp 256.2-256.8 °C;  $^1\text{H}$  NMR (400 MHz,  $\text{CDCl}_3$ )  $\delta$  8.49-8.41 (m, 2H), 7.97 (d,  $J = 8.9$  Hz, 1H), 7.91 (d,  $J = 8.2$  Hz, 1H), 7.74 (d,  $J = 8.4$  Hz, 1H), 7.68-7.57 (m, 5H), 7.50-7.42 (m, 4H), 7.41-7.29 (m, 3H), 7.20-7.13 (m, 2H), 7.11-6.95 (m, 5H), 6.66 (d,  $J = 8.8$  Hz, 2H), 5.72-5.63 (m, 1H), 5.51 (d,  $J = 5.0$  Hz, 1H), 4.56 (dd,  $J = 9.7, 5.0$  Hz, 1H), 3.75 (s, 3H), 2.77 (d,  $J = 4.3$  Hz, 1H);  $^{13}\text{C}$  NMR (101 MHz,  $\text{CDCl}_3$ )  $\delta$  193.7, 173.4, 171.0, 163.9, 155.7, 147.3, 137.3, 135.1, 131.6, 131.2, 130.8, 130.6, 130.6, 130.2, 129.6, 129.2, 129.1, 128.8, 128.6, 128.5, 128.3, 127.9, 127.8, 127.7, 127.4, 126.1, 125.4, 125.4, 124.7, 119.1, 118.9, 113.4, 72.3, 65.9, 55.7, 55.4, 47.6; HRMS (ESI)  $m/z$  Calcd. for  $\text{C}_{45}\text{H}_{34}\text{N}_3\text{O}_5^+$  ( $[\text{M}+\text{H}]^+$ ) 696.2493, Found 696.2497.

### Compound 3ha

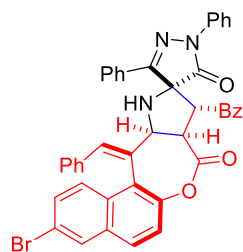

3ha

White solid, 70% yield, 104.2 mg; mp 281.5-281.9 °C;  $^1\text{H}$  NMR (400 MHz,  $\text{CDCl}_3$ )  $\delta$  8.38-8.28 (m, 2H), 7.96 (d,  $J = 1.3$  Hz, 1H), 7.80 (d,  $J = 8.9$  Hz, 1H), 7.62-7.55 (m, 3H), 7.53 (d,  $J = 9.0$  Hz, 1H), 7.48 (d,  $J = 7.9$  Hz, 2H), 7.45-7.34 (m, 4H), 7.31 (dd,  $J = 9.0, 1.6$  Hz, 1H), 7.26-7.22 (m, 2H), 7.18-7.11 (m, 2H), 7.11-6.97 (m, 5H), 6.88 (d,  $J = 7.1$  Hz, 2H), 5.54-5.40 (m, 2H), 4.48 (dd,  $J = 9.6, 4.9$  Hz, 1H), 2.79 (d,  $J = 4.0$  Hz, 1H);  $^{13}\text{C}$  NMR (101 MHz,  $\text{CDCl}_3$ )  $\delta$  195.7, 173.3, 170.6, 155.8, 147.5, 136.9, 136.3, 134.9, 133.6, 132.6, 131.2, 130.9, 130.4, 129.9, 129.7, 129.5, 129.1, 128.7, 128.6, 128.4, 128.4, 128.3,



128.3, 127.9, 127.4, 126.5, 125.6, 125.5, 120.2, 120.2, 119.0, 72.0, 65.5, 56.0, 47.2; HRMS (ESI)  $m/z$  Calcd. for  $C_{44}H_{31}BrN_3O_4^+$  ( $[M+H]^+$ ) 744.1492, Found 744.1497.

### Compound 3ia

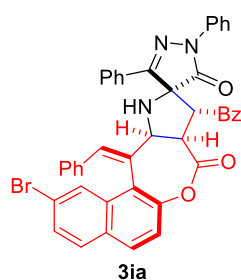

3ia

White solid, 70% yield, 104.2 mg; mp 296.1-296.8 °C;  $^1H$  NMR (600 MHz,  $CDCl_3$ )  $\delta$  8.38 (d,  $J = 4.6$  Hz, 2H), 7.93 (d,  $J = 8.6$  Hz, 1H), 7.84 (s, 1H), 7.76 (d,  $J = 8.6$  Hz, 1H), 7.66-7.59 (m, 3H), 7.57-7.49 (m, 3H), 7.48-7.38 (m, 4H), 7.35-7.29 (m, 2H), 7.21-7.13 (m, 4H), 7.12-7.03 (m, 3H), 6.96 (d,  $J = 6.9$  Hz, 2H), 5.60 (d,  $J = 7.5$  Hz, 1H), 5.50 (d,  $J = 4.2$  Hz, 1H), 4.59-4.50 (m, 1H), 2.80 (s, 1H);  $^{13}C$  NMR (101 MHz,  $CDCl_3$ )  $\delta$  195.6, 173.1, 170.5, 155.6, 148.1, 137.0, 136.3, 134.8, 133.6, 131.4, 131.3, 130.6, 130.1, 130.0, 129.8, 129.6, 129.4, 129.2, 128.7, 128.6, 128.6, 128.4, 128.3, 128.2, 128.0, 127.3, 126.8, 125.6, 124.6, 122.3, 119.6, 119.0, 72.1, 65.4, 55.9, 47.2; HRMS (ESI)  $m/z$  Calcd. for  $C_{44}H_{31}BrN_3O_4^+$  ( $[M+H]^+$ ) 744.1492, Found 744.1489.

### Compound 3ja

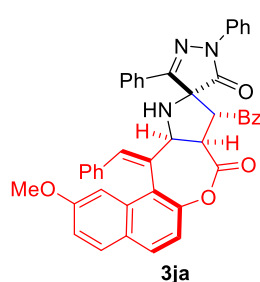

3ja

White solid, 68% yield, 94.6 mg; mp 283.5-286.1 °C;  $^1H$  NMR (400 MHz,  $CDCl_3$ )  $\delta$  8.38 (d,  $J = 4.6$  Hz, 2H), 7.86 (d,  $J = 8.7$  Hz, 1H), 7.76 (d,  $J = 9.0$  Hz, 1H), 7.65-7.57 (m, 3H), 7.54 (d,  $J = 8.0$  Hz, 2H), 7.45-7.37 (m, 3H), 7.34-7.27 (m, 3H), 7.21-7.13 (m, 3H), 7.12-6.96 (m, 7H), 6.90 (s, 1H), 5.60 (d,  $J = 7.6$  Hz, 1H), 5.51 (d,  $J = 4.6$  Hz, 1H), 4.54 (dd,  $J = 9.0, 4.9$  Hz, 1H), 3.60 (s, 3H), 2.81 (d,  $J = 3.3$  Hz, 1H);  $^{13}C$  NMR (101 MHz,  $CDCl_3$ )  $\delta$  195.7, 173.2, 170.9, 159.0, 155.7, 148.0, 137.1, 136.3, 135.2, 133.5, 131.4, 131.2, 130.8, 130.2, 129.9, 129.4, 129.2, 128.6, 128.5, 128.3, 128.2, 128.0, 127.8, 127.3, 127.0, 125.5, 124.0, 118.9, 118.8, 116.6, 103.1, 72.1, 65.5, 56.1, 55.2, 47.2; HRMS (ESI)  $m/z$  Calcd. for  $C_{45}H_{33}N_3NaO_5^+$  ( $[M+Na]^+$ ) 718.2312, Found 718.2307.

### Compound 5aa

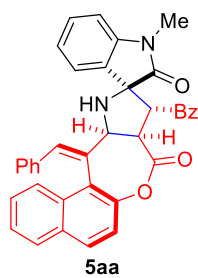

5aa

White solid, 72% yield, 83.0 mg, dr = 15:1; mp 183.3-183.9 °C;  $^1H$  NMR (400 MHz,  $CDCl_3$ )  $\delta$  7.99 (d,  $J = 8.9$  Hz, 1H), 7.90 (d,  $J = 8.2$  Hz, 1H), 7.76 (d,  $J = 8.4$  Hz, 1H), 7.51-7.41 (m, 2H), 7.40-7.31 (m, 2H), 7.30-7.26 (m, 2H), 7.21-7.14 (m, 2H), 7.10-7.04 (m, 2H), 7.03-6.93 (m, 4H), 6.92-6.82 (m, 3H), 6.34 (d,  $J = 7.8$  Hz, 1H), 5.48 (d,  $J = 4.3$  Hz, 1H), 5.03 (t,  $J = 9.7$  Hz, 1H), 4.58 (dd,  $J = 9.0, 4.3$  Hz, 1H), 3.16 (d,  $J = 12.7$  Hz, 1H), 2.94 (s, 3H);  $^{13}C$  NMR (101 MHz,  $CDCl_3$ )  $\delta$  196.3, 175.3, 170.2, 147.8, 143.0, 136.5, 134.8, 132.8, 131.7, 130.8, 130.0, 129.4, 129.4,



128.8, 128.7, 128.5, 128.2, 127.9, 127.9, 127.8, 127.7, 126.0, 125.4, 125.3, 124.6, 123.0, 119.5, 108.2, 71.6, 70.6, 59.2, 49.9, 26.4; HRMS (ESI)  $m/z$  Calcd. for  $C_{38}H_{29}N_2O_4^+$  ( $[M+H]^+$ ) 577.2122, Found 577.2125.

### Compound 5ab

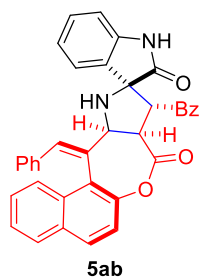

White solid, 45% yield, 50.6 mg, dr = 4:1; mp 180.5-181.3 °C;  $^1H$  NMR (600 MHz,  $CDCl_3$ )  $\delta$  8.00 (d,  $J$  = 8.8 Hz, 1H), 7.91 (d,  $J$  = 8.1 Hz, 1H), 7.82 (s, 1H), 7.76 (d,  $J$  = 8.4 Hz, 1H), 7.51-7.38 (m, 5H), 7.38-7.33 (m, 1H), 7.24-7.19 (m, 2H), 7.08 (s, 1H), 7.05-6.94 (m, 5H), 6.92-6.83 (m, 3H), 6.51 (d,  $J$  = 7.7 Hz, 1H), 5.53 (d,  $J$  = 4.0 Hz, 1H), 5.07-5.01 (m, 1H), 4.59 (dd,  $J$  = 8.9, 4.1 Hz, 1H), 3.11 (d,  $J$  = 12.9 Hz, 1H);  $^{13}C$  NMR (151 MHz,  $CDCl_3$ )  $\delta$  196.4, 177.1, 170.3, 147.8, 139.9, 136.4, 134.8, 133.1, 131.7, 130.8, 130.0, 129.5, 129.5, 128.8, 128.7, 128.5, 128.3, 128.3, 128.2, 128.0, 127.9, 127.7, 126.1, 126.0, 125.3, 124.6, 123.0, 119.5, 110.0, 71.4, 70.9, 58.4, 50.2; HRMS (ESI)  $m/z$  Calcd. for  $C_{37}H_{27}N_2O_4^+$  ( $[M+H]^+$ ) 563.1965, Found 563.1961.

### Compound 5ac

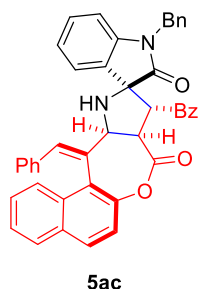

White solid, 50% yield, 65.3 mg, dr > 20:1; mp 190.6-191.2 °C;  $^1H$  NMR (600 MHz,  $CDCl_3$ )  $\delta$  7.99 (d,  $J$  = 8.7 Hz, 1H), 7.90 (d,  $J$  = 7.9 Hz, 1H), 7.75 (d,  $J$  = 8.2 Hz, 1H), 7.50-7.30 (m, 6H), 7.27-7.22 (m, 3H), 7.20-7.07 (m, 5H), 7.04-6.89 (m, 7H), 6.87-6.79 (m, 1H), 6.29 (d,  $J$  = 7.5 Hz, 1H), 5.58 (d,  $J$  = 3.1 Hz, 1H), 5.15-4.94 (m, 2H), 4.68-4.52 (m, 1H), 4.25 (d,  $J$  = 15.5 Hz, 1H), 3.25 (d,  $J$  = 12.3 Hz, 1H);  $^{13}C$  NMR (151 MHz,  $CDCl_3$ )  $\delta$  196.3, 175.6, 170.2, 147.8, 142.3, 136.5, 134.8, 134.8, 133.0, 131.7, 130.8, 130.0, 129.5, 129.4, 128.9, 128.7, 128.5, 128.2, 128.0, 127.9, 127.8, 127.8, 127.7, 127.3, 126.1, 125.7, 125.4, 124.6, 123.0, 119.5, 109.4, 71.4, 70.7, 58.5, 50.4, 44.3; HRMS (ESI)  $m/z$  Calcd. for  $C_{44}H_{33}N_2O_4^+$  ( $[M+H]^+$ ) 653.2435, Found 653.2435.

### Compound 5ad

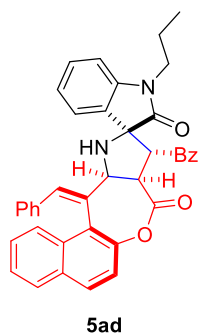

White solid, 48% yield, 58.1 mg, dr = 12:1; mp 189.3-190.4 °C;  $^1H$  NMR (400 MHz,  $CDCl_3$ )  $\delta$  7.99 (d,  $J$  = 8.9 Hz, 1H), 7.90 (d,  $J$  = 8.1 Hz, 1H), 7.75 (d,  $J$  = 8.4 Hz, 1H), 7.51-7.40 (m, 2H), 7.40-7.30 (m, 4H), 7.22-7.14 (m, 2H), 7.11-7.04 (m, 2H), 7.03-6.93 (m, 4H), 6.93-6.80 (m, 3H), 6.42 (d,  $J$  = 7.8 Hz, 1H), 5.51 (d,  $J$  = 4.4 Hz, 1H), 5.09-4.95 (m, 1H), 4.58 (dd,  $J$  = 9.0, 4.4 Hz, 1H), 3.65-3.50 (m, 1H), 3.26-3.10 (m, 2H), 1.57-1.38 (m, 2H), 0.89 (t,  $J$  = 7.4 Hz, 3H);  $^{13}C$

NMR (101 MHz, CDCl<sub>3</sub>)  $\delta$  196.4, 175.2, 170.2, 147.8, 142.7, 136.6, 134.8, 132.9, 131.6, 130.8, 130.0, 129.4, 128.8, 128.7, 128.5, 128.2, 128.1, 128.0, 127.9, 127.8, 127.7, 126.0, 125.8, 125.3, 124.6, 122.7, 119.5, 108.6, 71.4, 70.6, 58.6, 50.2, 42.1, 20.6, 11.5; HRMS (ESI)  $m/z$  Calcd. for C<sub>40</sub>H<sub>33</sub>N<sub>2</sub>O<sub>4</sub><sup>+</sup> ([M+H]<sup>+</sup>) 605.2435, Found 605.2437.

### Compound 5ae

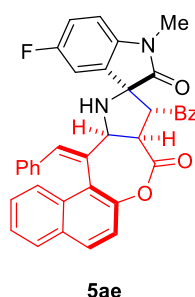

White solid, 58% yield, 69.0 mg, dr = 7:1; mp 208.3-208.9 °C; <sup>1</sup>H NMR (400 MHz, CDCl<sub>3</sub>)  $\delta$  8.00 (d,  $J$  = 8.9 Hz, 1H), 7.91 (d,  $J$  = 8.1 Hz, 1H), 7.76 (d,  $J$  = 8.4 Hz, 1H), 7.47 (d,  $J$  = 8.8 Hz, 1H), 7.45-7.32 (m, 5H), 7.24-7.17 (m, 2H), 7.04 (d,  $J$  = 2.2 Hz, 1H), 7.02-6.94 (m, 3H), 6.92-6.87 (m, 2H), 6.82-6.71 (m, 2H), 6.28 (dd,  $J$  = 8.5, 4.1 Hz, 1H), 5.49 (d,  $J$  = 4.3 Hz, 1H), 4.95 (d,  $J$  = 8.5 Hz, 1H), 4.56 (dd,  $J$  = 9.0, 4.3 Hz, 1H), 3.18 (s, 1H), 2.94 (s, 3H); <sup>13</sup>C NMR (101 MHz, CDCl<sub>3</sub>)  $\delta$  196.0, 175.1, 170.0, 159.0 (d,  $J$  = 243.4 Hz), 147.7, 138.9, 136.3, 134.7, 133.0, 131.7, 130.9, 129.9, 129.5, 129.3 (d,  $J$  = 8.1 Hz), 128.7, 128.6, 128.5, 128.2, 128.1, 128.0, 127.9, 127.8, 126.1, 125.2, 124.6, 119.4, 115.7 (d,  $J$  = 23.2 Hz), 113.7 (d,  $J$  = 25.2 Hz), 108.6 (d,  $J$  = 8.1 Hz), 71.6, 70.9, 59.1, 49.9, 26.5; <sup>19</sup>F NMR (377 MHz, CDCl<sub>3</sub>)  $\delta$  -119.15; HRMS (ESI)  $m/z$  Calcd. for C<sub>38</sub>H<sub>28</sub>FN<sub>2</sub>O<sub>4</sub><sup>+</sup> ([M+H]<sup>+</sup>) 595.2028, Found 595.2026.

### Compound 5af

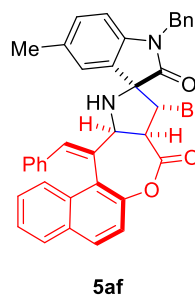

White solid, 52% yield, 69.3 mg, dr > 20:1; mp 187.2-187.8 °C; <sup>1</sup>H NMR (400 MHz, CDCl<sub>3</sub>)  $\delta$  8.00 (d,  $J$  = 8.9 Hz, 1H), 7.92 (d,  $J$  = 8.1 Hz, 1H), 7.78 (d,  $J$  = 8.4 Hz, 1H), 7.50-7.32 (m, 6H), 7.26-7.24 (m, 3H), 7.20-7.09 (m, 5H), 7.03-6.89 (m, 5H), 6.82 (s, 1H), 6.76 (d,  $J$  = 8.0 Hz, 1H), 6.16 (d,  $J$  = 8.0 Hz, 1H), 5.57 (d,  $J$  = 4.4 Hz, 1H), 5.10-4.97 (m, 2H), 4.60 (dd,  $J$  = 9.0, 4.4 Hz, 1H), 4.22 (d,  $J$  = 15.6 Hz, 1H), 3.25 (d,  $J$  = 12.8 Hz, 1H), 2.14 (s, 3H); <sup>13</sup>C NMR (101 MHz, CDCl<sub>3</sub>)  $\delta$  196.4, 175.5, 170.2, 147.9, 139.8, 136.6, 134.9, 134.9, 132.9, 132.7, 131.6, 130.8, 130.0, 129.6, 129.6, 128.8, 128.8, 128.7, 128.5, 128.2, 128.0, 127.9, 127.8, 127.7, 127.3, 126.3, 126.0, 125.4, 124.8, 119.5, 109.2, 71.5, 70.8, 58.6, 50.4, 44.3, 21.0; HRMS (ESI)  $m/z$  Calcd. for C<sub>45</sub>H<sub>35</sub>N<sub>2</sub>O<sub>4</sub><sup>+</sup> ([M+H]<sup>+</sup>) 667.2591, Found 667.2590.

### Compound 5ba

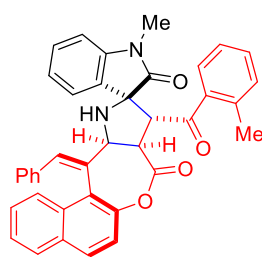

5ba

Yellow solid, 60% yield, 70.9 mg, dr = 5:1; mp 190.4-191.2 °C; <sup>1</sup>H NMR (400 MHz, CDCl<sub>3</sub>) δ 7.99 (d, *J* = 8.9 Hz, 1H), 7.89 (d, *J* = 8.1 Hz, 1H), 7.74 (d, *J* = 8.3 Hz, 1H), 7.52-7.44 (m, 2H), 7.44-7.38 (m, 1H), 7.36-7.29 (m, 1H), 7.24-7.11 (m, 3H), 7.06-6.94 (m, 5H), 6.93-6.82 (m, 4H), 6.43 (d, *J* = 7.8 Hz, 1H), 5.50 (d, *J* = 5.2 Hz, 1H), 5.00 (t, *J* = 9.9 Hz, 1H), 4.58 (dd, *J* = 9.3, 5.3 Hz, 1H), 3.08 (d, *J* = 12.3 Hz, 1H), 2.82 (s, 3H), 1.68 (s, 3H); <sup>13</sup>C NMR (101 MHz, CDCl<sub>3</sub>) δ 197.4, 175.0, 170.3, 147.7, 143.1, 139.3, 135.3, 134.8, 131.6, 131.2, 130.8, 129.9, 129.7, 129.4, 129.0, 128.8, 128.7, 128.5, 128.2, 128.1, 127.8, 127.7, 126.0, 125.3, 125.1, 124.9, 124.6, 123.1, 119.5, 108.4, 70.6, 69.9, 60.3, 49.3, 26.3, 20.1; HRMS (ESI) *m/z* Calcd. for C<sub>39</sub>H<sub>31</sub>N<sub>2</sub>O<sub>4</sub><sup>+</sup> ([M+H]<sup>+</sup>) 591.2278, Found 591.2271.

### Compound 5ca

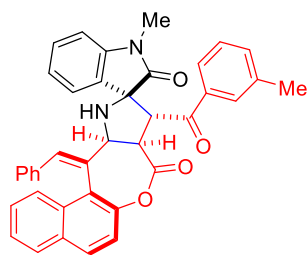

5ca

White solid, 72% yield, 85.1 mg, dr = 12:1; mp 200.5-200.9 °C; <sup>1</sup>H NMR (400 MHz, CDCl<sub>3</sub>) δ 7.97 (d, *J* = 8.9 Hz, 1H), 7.88 (d, *J* = 8.1 Hz, 1H), 7.75 (d, *J* = 8.4 Hz, 1H), 7.47 (d, *J* = 8.9 Hz, 1H), 7.43-7.37 (m, 1H), 7.34-7.27 (m, 1H), 7.16 (d, *J* = 7.2 Hz, 1H), 7.12-7.03 (m, 4H), 7.02-6.92 (m, 5H), 6.91-6.81 (m, 3H), 6.34 (d, *J* = 7.8 Hz, 1H), 5.45 (d, *J* = 4.3 Hz, 1H), 5.03 (t, *J* = 10.1 Hz, 1H), 4.59 (dd, *J* = 9.0, 4.3 Hz, 1H), 3.15 (d, *J* = 12.9 Hz, 1H), 2.94 (s, 3H), 2.20 (s, 3H); <sup>13</sup>C NMR (101 MHz, CDCl<sub>3</sub>) δ 196.5, 175.3, 170.3, 147.8, 143.1, 137.9, 136.6, 134.9, 133.5, 131.6, 130.8, 130.0, 129.4, 129.3, 128.9, 128.7, 128.5, 128.4, 128.2, 128.0, 127.8, 127.8, 127.7, 126.0, 125.4, 125.4, 125.0, 124.6, 122.9, 119.5, 108.1, 71.6, 70.6, 59.3, 49.8, 26.3, 21.1; HRMS (ESI) *m/z* Calcd. for C<sub>39</sub>H<sub>31</sub>N<sub>2</sub>O<sub>4</sub><sup>+</sup> ([M+H]<sup>+</sup>) 591.2278, Found 591.2277.

### Compound 5da

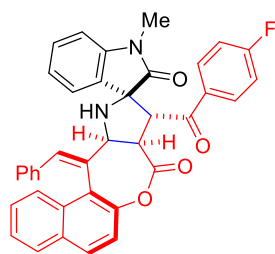

5da

White solid, 68% yield, 80.9 mg, dr = 11:1; mp 198.6-199.3 °C; <sup>1</sup>H NMR (400 MHz, CDCl<sub>3</sub>) δ 7.98 (d, *J* = 8.9 Hz, 1H), 7.88 (d, *J* = 8.1 Hz, 1H), 7.75 (d, *J* = 8.4 Hz, 1H), 7.47 (d, *J* = 8.9 Hz, 1H), 7.44-7.38 (m, 1H), 7.37-7.28 (m, 3H), 7.12-7.04 (m, 2H), 7.02-6.92 (m, 4H), 6.91-6.81 (m, 5H), 6.41 (d, *J* = 7.8 Hz, 1H), 5.43 (d, *J* = 4.3 Hz, 1H), 5.10-4.97 (m, 1H), 4.57 (dd, *J* = 9.0, 4.3 Hz, 1H), 3.16 (d, *J* = 13.2 Hz, 1H), 3.00 (s, 3H); <sup>13</sup>C NMR (101 MHz, CDCl<sub>3</sub>) δ 194.6, 175.3, 170.1, 165.5 (d, *J* = 256.5 Hz), 147.8, 142.9, 134.8, 132.8 (d, *J*

= 3.0 Hz), 131.6, 130.9, 130.6 (d,  $J = 9.1$  Hz), 130.0, 129.6, 129.4, 128.8, 128.7, 128.5, 128.2, 127.9, 127.8, 127.7, 126.1, 125.5, 125.3, 124.6, 123.0, 119.5, 115.1 (d,  $J = 22.2$  Hz), 108.3, 71.5, 70.6, 59.0, 50.0, 26.5;  $^{19}\text{F}$  NMR (377 MHz,  $\text{CDCl}_3$ )  $\delta$  -104.49; HRMS (ESI)  $m/z$  Calcd. for  $\text{C}_{38}\text{H}_{28}\text{FN}_2\text{O}_4^+$  ( $[\text{M}+\text{H}]^+$ ) 595.2028, Found 595.2028.

### Compound 5ea

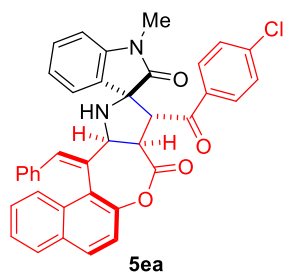

White solid, 65% yield, 79.4 mg, dr = 7:1; mp 205.4-206.3 °C;  $^1\text{H}$  NMR (400 MHz,  $\text{CDCl}_3$ )  $\delta$  7.99 (d,  $J = 8.9$  Hz, 1H), 7.90 (d,  $J = 8.1$  Hz, 1H), 7.75 (d,  $J = 8.4$  Hz, 1H), 7.50-7.41 (m, 2H), 7.37-7.30 (m, 1H), 7.25 (d,  $J = 9.8$  Hz, 2H), 7.19-7.13 (m, 2H), 7.13-7.07 (m, 1H), 7.05 (d,  $J = 2.2$  Hz, 1H), 7.02-6.92 (m, 4H), 6.92-6.83 (m, 3H), 6.43 (d,  $J = 7.8$  Hz, 1H), 5.46-5.37 (m, 1H), 5.02 (d,  $J = 8.2$  Hz, 1H), 4.55 (dd,  $J = 9.0, 4.4$  Hz, 1H), 3.16 (d,  $J = 10.3$  Hz, 1H), 3.00 (s, 3H);  $^{13}\text{C}$  NMR (101 MHz,  $\text{CDCl}_3$ )  $\delta$  195.1, 175.2, 170.1, 147.8, 142.9, 139.4, 134.8, 131.7, 130.8, 130.0, 129.6, 129.5, 129.3, 128.7, 128.7, 128.5, 128.2, 128.2, 127.9, 127.7, 127.7, 126.1, 125.5, 125.3, 124.6, 123.1, 119.5, 108.3, 71.5, 70.6, 59.1, 49.9, 26.5; HRMS (ESI)  $m/z$  Calcd. for  $\text{C}_{38}\text{H}_{28}\text{ClN}_2\text{O}_4^+$  ( $[\text{M}+\text{H}]^+$ ) 611.1732, Found 611.1730.

### Compound 5fa

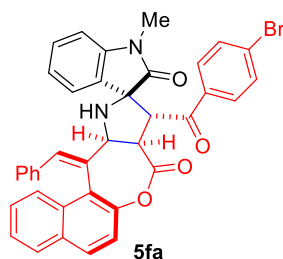

White solid, 70% yield, 91.8 mg, dr = 10:1; mp 262.5-263.3 °C;  $^1\text{H}$  NMR (400 MHz,  $\text{CDCl}_3$ )  $\delta$  7.98 (d,  $J = 8.9$  Hz, 1H), 7.89 (d,  $J = 8.1$  Hz, 1H), 7.74 (d,  $J = 8.4$  Hz, 1H), 7.50-7.38 (m, 2H), 7.37-7.28 (m, 3H), 7.19-7.04 (m, 4H), 7.02-6.82 (m, 7H), 6.42 (d,  $J = 7.8$  Hz, 1H), 5.42 (d,  $J = 4.2$  Hz, 1H), 5.02 (t,  $J = 10.0$  Hz, 1H), 4.55 (dd,  $J = 8.9, 4.3$  Hz, 1H), 3.15 (d,  $J = 12.5$  Hz, 1H), 2.99 (s, 3H);  $^{13}\text{C}$  NMR (101 MHz,  $\text{CDCl}_3$ )  $\delta$  195.3, 175.2, 170.1, 147.8, 142.9, 135.2, 134.8, 131.6, 131.2, 130.9, 130.0, 129.7, 129.5, 129.4, 128.7, 128.5, 128.2, 128.0, 127.9, 127.7, 127.7, 126.1, 125.5, 125.3, 124.6, 123.1, 119.5, 108.3, 71.5, 70.6, 59.1, 49.9, 26.5; HRMS (ESI)  $m/z$  Calcd. for  $\text{C}_{38}\text{H}_{28}\text{BrN}_2\text{O}_4^+$  ( $[\text{M}+\text{H}]^+$ ) 655.1227, Found 655.1224.

### Compound 5ga

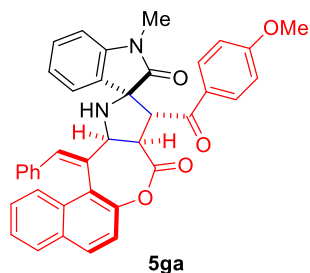

White solid, 66% yield, 80.1 mg, dr = 9:1; mp 191.2-192.0 °C;  $^1\text{H}$  NMR (400 MHz,  $\text{CDCl}_3$ )  $\delta$  7.98 (d,  $J = 8.8$  Hz, 1H), 7.90 (d,  $J = 8.1$  Hz, 1H), 7.76 (d,  $J = 8.3$  Hz, 1H), 7.50-7.39 (m, 2H), 7.39-7.30 (m, 3H), 7.12-7.03 (m, 2H), 7.03-6.93 (m, 4H), 6.92-6.81 (m, 3H), 6.66 (d,  $J = 8.6$  Hz, 2H), 6.42

(d,  $J = 7.8$  Hz, 1H), 5.44 (d,  $J = 4.1$  Hz, 1H), 5.04 (s, 1H), 4.58 (dd,  $J = 8.9, 4.2$  Hz, 1H), 3.78 (s, 3H), 3.17 (s, 1H), 3.02 (s, 3H);  $^{13}\text{C}$  NMR (101 MHz,  $\text{CDCl}_3$ )  $\delta$  194.4, 175.5, 170.3, 163.5, 147.8, 142.9, 134.9, 131.6, 130.8, 130.3, 130.0, 129.4, 129.3, 129.3, 128.9, 128.7, 128.5, 128.2, 127.9, 127.8, 127.7, 126.0, 125.5, 125.4, 124.6, 122.9, 119.5, 113.2, 108.2, 71.7, 70.9, 58.5, 55.5, 50.2, 26.5; HRMS (ESI)  $m/z$  Calcd. for  $\text{C}_{39}\text{H}_{31}\text{N}_2\text{O}_5^+$  ( $[\text{M}+\text{H}]^+$ ) 607.2227, Found 607.2224.

### Compound 5ha

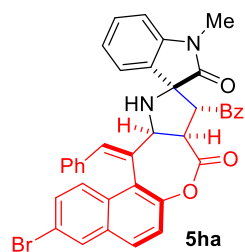

White solid, 64% yield, 83.9 mg, dr > 20:1; mp 230.8-231.4 °C;  $^1\text{H}$  NMR (400 MHz,  $\text{CDCl}_3$ )  $\delta$  8.04 (d,  $J = 1.7$  Hz, 1H), 7.89 (d,  $J = 8.9$  Hz, 1H), 7.60 (d,  $J = 9.0$  Hz, 1H), 7.50 (d,  $J = 8.9$  Hz, 1H), 7.41-7.34 (m, 2H), 7.30-7.26 (m, 2H), 7.21-7.14 (m, 2H), 7.10-7.05 (m, 2H), 7.04-6.92 (m, 4H), 6.90-6.82 (m, 3H), 6.35 (d,  $J = 7.8$  Hz, 1H), 5.46 (d,  $J = 4.4$  Hz, 1H), 5.00 (t,  $J = 10.2$  Hz, 1H), 4.58 (dd,  $J = 9.0, 4.4$  Hz, 1H), 3.14 (d,  $J = 12.8$  Hz, 1H), 2.94 (s, 3H);  $^{13}\text{C}$  NMR (101 MHz,  $\text{CDCl}_3$ )  $\delta$  196.2, 175.2, 169.9, 148.1, 143.0, 136.4, 134.6, 132.8, 132.7, 131.0, 130.5, 129.8, 129.5, 128.6, 128.5, 128.4, 128.3, 128.1, 128.0, 127.9, 127.8, 126.4, 125.6, 125.4, 123.0, 120.7, 120.2, 108.2, 71.4, 70.6, 59.2, 49.8, 26.4; HRMS (ESI)  $m/z$  Calcd. for  $\text{C}_{38}\text{H}_{28}\text{BrN}_2\text{O}_4^+$  ( $[\text{M}+\text{H}]^+$ ) 655.1227, Found 655.1224.

### Compound 5ia

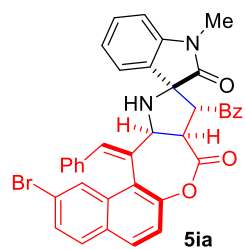

White solid, 58% yield, 76.0 mg, dr = 9:1; mp 220.6-221.3 °C;  $^1\text{H}$  NMR (400 MHz,  $\text{CDCl}_3$ )  $\delta$  7.94 (d,  $J = 8.9$  Hz, 1H), 7.88 (d,  $J = 1.2$  Hz, 1H), 7.72 (d,  $J = 8.7$  Hz, 1H), 7.51-7.43 (m, 2H), 7.40-7.34 (m, 1H), 7.30-7.26 (m, 2H), 7.21-7.14 (m, 2H), 7.11-6.96 (m, 6H), 6.93-6.85 (m, 3H), 6.35 (d,  $J = 7.8$  Hz, 1H), 5.46 (d,  $J = 4.3$  Hz, 1H), 5.03 (t,  $J = 9.1$  Hz, 1H), 4.58 (dd,  $J = 9.0, 4.4$  Hz, 1H), 3.14 (d,  $J = 12.7$  Hz, 1H), 2.95 (s, 3H);  $^{13}\text{C}$  NMR (101 MHz,  $\text{CDCl}_3$ )  $\delta$  196.2, 175.2, 169.8, 148.7, 142.9, 136.4, 134.7, 132.8, 131.2, 130.7, 130.1, 130.0, 129.5, 129.5, 128.5, 128.5, 128.3, 128.0, 128.0, 127.9, 127.8, 126.9, 125.4, 124.6, 123.0, 122.3, 119.9, 108.2, 71.3, 70.6, 59.2, 49.9, 26.4; HRMS (ESI)  $m/z$  Calcd. for  $\text{C}_{38}\text{H}_{28}\text{BrN}_2\text{O}_4^+$  ( $[\text{M}+\text{H}]^+$ ) 655.1227, Found 655.1224.

### Compound 5ja

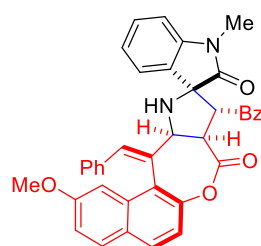

White solid, 62% yield, 75.2 mg, dr = 12:1; mp 270.3-270.9 °C;  $^1\text{H}$  NMR (400 MHz,  $\text{CDCl}_3$ )  $\delta$  7.90 (d,  $J = 8.7$  Hz, 1H), 7.76 (d,  $J = 8.9$  Hz, 1H), 7.40-7.35 (m, 1H), 7.33 (d,  $J = 8.7$  Hz, 1H), 7.31-7.27 (m, 2H), 7.21-7.14 (m, 2H), 7.09-7.05 (m, 2H),

7.05-6.91 (m, 8H), 6.90-6.85 (m, 1H), 6.35 (d,  $J = 7.6$  Hz, 1H), 5.49 (d,  $J = 3.1$  Hz, 1H), 5.03 (dd,  $J = 11.9, 10.2$  Hz, 1H), 4.62 (dd,  $J = 8.2, 3.4$  Hz, 1H), 3.55 (s, 3H), 3.22 (d,  $J = 13.7$  Hz, 1H), 2.95 (s, 3H);  $^{13}\text{C}$  NMR (101 MHz,  $\text{CDCl}_3$ )  $\delta$  196.2, 175.3, 170.2, 159.1, 148.6, 143.0, 136.5, 135.1, 132.8, 131.2, 130.5, 130.0, 129.5, 129.4, 129.3, 128.4, 128.2, 127.9, 127.9, 127.7, 127.0, 125.6, 124.0, 123.0, 118.9, 117.0, 108.2, 102.8, 71.4, 70.6, 59.3, 55.2, 49.8, 26.4; HRMS (ESI)  $m/z$  Calcd. for  $\text{C}_{39}\text{H}_{31}\text{N}_2\text{O}_5^+$  ( $[\text{M}+\text{H}]^+$ ) 607.2227, Found 607.2228.

### Compound 5ka

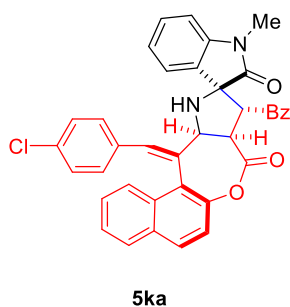

White solid, 72% yield, 88.0 mg, dr = 12:1; mp 272.3-273.6 °C;  $^1\text{H}$  NMR (600 MHz,  $\text{CDCl}_3$ )  $\delta$  8.00 (d,  $J = 8.8$  Hz, 1H), 7.91 (d,  $J = 8.2$  Hz, 1H), 7.71 (d,  $J = 8.4$  Hz, 1H), 7.46 (dd,  $J = 16.6, 8.4$  Hz, 2H), 7.39-7.32 (m, 2H), 7.27 (d,  $J = 7.8$  Hz, 2H), 7.20-7.14 (m, 2H), 7.09-7.04 (m, 1H), 7.01 (d,  $J = 1.6$  Hz, 1H), 6.96-6.91 (m, 3H), 6.88-6.83 (m, 1H), 6.81 (d,  $J = 8.5$  Hz, 2H), 6.34 (d,  $J = 7.8$  Hz, 1H), 5.47 (d,  $J = 4.3$  Hz,

1H), 5.02 (t,  $J = 10.4$  Hz, 1H), 4.59 (dd,  $J = 9.0, 4.3$  Hz, 1H), 3.11 (d,  $J = 13.1$  Hz, 1H), 2.94 (s, 3H);  $^{13}\text{C}$  NMR (151 MHz,  $\text{CDCl}_3$ )  $\delta$  196.2, 175.3, 170.0, 147.8, 142.9, 136.4, 133.6, 133.4, 132.8, 131.6, 131.0, 129.9, 129.8, 129.5, 128.6, 128.5, 128.2, 128.0, 127.9, 127.9, 127.8, 126.2, 125.4, 124.8, 124.4, 123.0, 119.5, 108.2, 71.5, 70.5, 59.1, 49.8, 26.4; HRMS (ESI)  $m/z$  Calcd. for  $\text{C}_{38}\text{H}_{28}\text{ClN}_2\text{O}_4^+$  ( $[\text{M}+\text{H}]^+$ ) 611.1732, Found 611.1729.

### Compound 5la

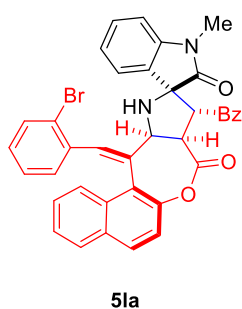

White solid, 74% yield, 97.0 mg, dr = 10:1; mp 214.5-215.3 °C;  $^1\text{H}$  NMR (400 MHz,  $\text{CDCl}_3$ )  $\delta$  7.91 (d,  $J = 8.9$  Hz, 1H), 7.83-7.76 (m, 2H), 7.48-7.32 (m, 5H), 7.32-7.23 (m, 3H), 7.21-7.13 (m, 2H), 7.11-7.01 (m, 1H), 6.95 (d,  $J = 7.4$  Hz, 1H), 6.90-6.77 (m, 3H), 6.77-6.69 (m, 1H), 6.33 (d,  $J = 7.8$  Hz, 1H), 5.48 (d,  $J = 4.4$  Hz, 1H), 5.03 (t,  $J = 7.4$  Hz, 1H), 4.60 (dd,  $J = 9.1, 4.5$  Hz, 1H), 3.09 (d,  $J = 10.5$  Hz, 1H), 2.92 (s, 3H);  $^{13}\text{C}$  NMR (101 MHz,

$\text{CDCl}_3$ )  $\delta$  196.3, 175.3, 170.1, 148.3, 143.0, 136.5, 135.5, 132.8, 132.2, 131.8, 131.4, 130.7, 130.2, 130.0, 129.6, 129.4, 129.1, 128.3, 128.1, 127.9, 127.9, 127.6, 126.9, 126.0, 125.5, 124.6, 124.4, 123.7, 122.8, 119.0, 108.1, 70.8, 70.6, 59.2, 49.7, 26.4; HRMS (ESI)  $m/z$  Calcd. for  $\text{C}_{38}\text{H}_{28}\text{BrN}_2\text{O}_4^+$  ( $[\text{M}+\text{H}]^+$ ) 655.1227, Found 655.1226.

### Compound 5ma

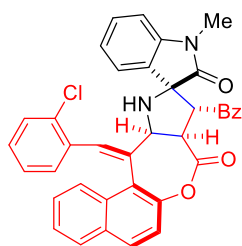

5ma

White solid, 67% yield, 81.9 mg, dr = 11:1; mp 271.3-271.8 °C;  $^1\text{H}$  NMR (600 MHz,  $\text{CDCl}_3$ )  $\delta$  7.91 (d,  $J = 8.8$  Hz, 1H), 7.81 (d,  $J = 7.8$  Hz, 1H), 7.77 (d,  $J = 8.1$  Hz, 1H), 7.43 (d,  $J = 8.8$  Hz, 1H), 7.41-7.33 (m, 3H), 7.32-7.26 (m, 3H), 7.20-7.15 (m, 3H), 7.09-7.04 (m, 1H), 6.95 (d,  $J = 7.4$  Hz, 1H), 6.92-6.88 (m, 1H), 6.87-6.83 (m, 1H), 6.80 (d,  $J = 7.3$  Hz, 1H), 6.70-6.65 (m, 1H), 6.33 (d,  $J = 7.8$  Hz, 1H), 5.53-5.42 (m, 1H), 5.04 (t,  $J = 9.9$  Hz, 1H), 4.61 (dd,  $J = 9.1, 4.4$  Hz, 1H), 3.11 (d,  $J = 12.5$  Hz, 1H), 2.92 (s, 3H);  $^{13}\text{C}$  NMR (151 MHz,  $\text{CDCl}_3$ )  $\delta$  196.3, 175.3, 170.1, 148.3, 143.0, 136.5, 133.7, 133.4, 132.8, 131.8, 131.5, 130.8, 130.1, 129.8, 129.4, 129.0, 129.0, 128.4, 128.0, 127.9, 127.9, 127.6, 127.3, 126.3, 126.0, 125.4, 124.7, 124.3, 122.9, 119.1, 108.2, 71.0, 70.6, 59.2, 49.7, 26.4; HRMS (ESI)  $m/z$  Calcd. for  $\text{C}_{38}\text{H}_{28}\text{ClN}_2\text{O}_4^+$  ( $[\text{M}+\text{H}]^+$ ) 611.1732, Found 611.1725.

### Compound 5na

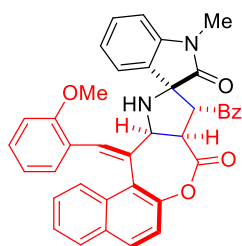

5na

White solid, 58% yield, 70.4 mg, dr = 10:1; mp 268.8-269.5 °C;  $^1\text{H}$  NMR (600 MHz,  $\text{CDCl}_3$ )  $\delta$  7.92 (d,  $J = 8.8$  Hz, 1H), 7.83 (d,  $J = 8.2$  Hz, 1H), 7.79 (d,  $J = 8.4$  Hz, 1H), 7.44 (d,  $J = 8.8$  Hz, 1H), 7.41-7.34 (m, 3H), 7.33-7.26 (m, 3H), 7.20-7.13 (m, 2H), 7.08-7.03 (m, 1H), 6.98-6.93 (m, 2H), 6.87-6.82 (m, 1H), 6.67 (dd,  $J = 13.5, 8.0$  Hz, 2H), 6.38-6.30 (m, 2H), 5.48 (d,  $J = 4.4$  Hz, 1H), 5.06-4.98 (m, 1H), 4.58 (dd,  $J = 9.1, 4.4$  Hz, 1H), 3.77 (s, 3H), 3.19 (d,  $J = 13.3$  Hz, 1H), 2.92 (s, 3H);  $^{13}\text{C}$  NMR (151 MHz,  $\text{CDCl}_3$ )  $\delta$  196.4, 175.4, 170.4, 157.1, 148.1, 143.0, 136.6, 132.7, 131.6, 130.4, 130.1, 129.4, 129.1, 128.9, 128.6, 128.3, 128.1, 127.9, 127.9, 127.4, 125.8, 125.8, 125.5, 125.3, 124.7, 124.1, 122.9, 120.0, 119.2, 110.1, 108.1, 71.5, 70.7, 59.4, 55.3, 49.9, 26.4; HRMS (ESI)  $m/z$  Calcd. for  $\text{C}_{39}\text{H}_{31}\text{N}_2\text{O}_5^+$  ( $[\text{M}+\text{H}]^+$ ) 607.2227, Found 607.2235.

### Compound 6

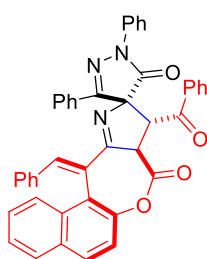

6

White solid, 82% yield, 54.4 mg; mp 210.2-210.9 °C;  $^1\text{H}$  NMR (600 MHz,  $\text{CDCl}_3$ )  $\delta$  8.07 (s, 1H), 8.04 (d,  $J = 8.8$  Hz, 1H), 7.90 (d,  $J = 8.2$  Hz, 1H), 7.84 (d,  $J = 3.5$  Hz, 2H), 7.78 (d,  $J = 8.5$  Hz, 1H), 7.61-7.58 (m, 3H), 7.56 (d,  $J = 8.9$  Hz, 1H), 7.47-7.39 (m, 5H), 7.39-7.35 (m, 1H), 7.30-7.26 (m, 1H), 7.24-7.17 (m, 4H), 7.14-7.09 (m, 2H), 7.06-7.00 (m, 4H), 5.55 (d,  $J = 7.7$  Hz, 1H), 5.32 (d,  $J = 7.7$  Hz, 1H);  $^{13}\text{C}$  NMR (101 MHz,  $\text{CDCl}_3$ )  $\delta$  193.7, 176.8, 168.4,



166.1, 156.5, 146.9, 139.9, 136.8, 136.1, 133.9, 133.8, 132.0, 131.6, 131.3, 130.2, 129.9, 129.9, 129.7, 129.6, 128.5, 128.5, 128.3, 127.9, 126.8, 126.6, 125.7, 125.6, 124.6, 123.4, 120.4, 119.1, 85.3, 56.1, 55.8; HRMS (ESI)  $m/z$  Calcd. for  $C_{44}H_{30}N_3O_4^+$  ( $[M+H]^+$ ) 664.2231, Found 664.2226.

### Compound 7

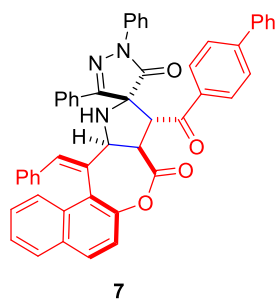

Yellow solid, 86% yield, 63.8 mg; mp 261.6-262.4 °C;  $^1H$  NMR (600 MHz,  $CDCl_3$ )  $\delta$  8.42 (d,  $J = 7.2$  Hz, 2H), 7.97 (d,  $J = 8.8$  Hz, 1H), 7.90 (d,  $J = 8.2$  Hz, 1H), 7.71 (d,  $J = 8.3$  Hz, 1H), 7.66-7.57 (m, 3H), 7.52 (d,  $J = 8.1$  Hz, 2H), 7.49-7.38 (m, 9H), 7.38-7.32 (m, 3H), 7.27-7.24 (m, 2H), 7.16-7.10 (m, 2H), 7.09-7.00 (m, 3H), 6.96 (d,  $J = 7.4$  Hz, 2H), 5.63 (d,  $J = 7.8$  Hz, 1H), 5.52 (d,  $J = 4.8$  Hz, 1H), 4.58 (dd,  $J = 9.7, 4.8$  Hz, 1H), 2.77 (d,  $J = 4.1$  Hz, 1H);  $^{13}C$  NMR (151 MHz,  $CDCl_3$ )  $\delta$  195.3, 173.3, 170.9, 155.8, 147.3, 146.3, 139.7, 137.2, 135.1, 135.0, 131.6, 131.3, 130.6, 130.4, 130.1, 129.5, 129.2, 129.0, 128.9, 128.8, 128.7, 128.5, 128.3, 128.0, 127.8, 127.7, 127.4, 127.3, 126.8, 126.2, 125.4, 125.3, 124.7, 119.2, 118.8, 72.3, 65.8, 56.2, 47.2; HRMS (ESI)  $m/z$  Calcd. for  $C_{50}H_{35}N_3NaO_4^+$  ( $[M+Na]^+$ ) 764.2520, Found 764.2520.

### Compound 8

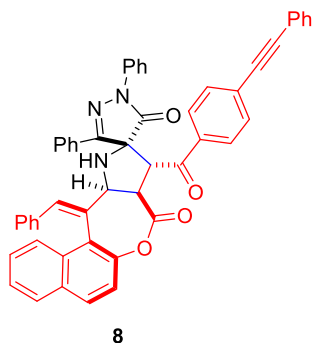

Yellow solid, 90% yield, 68.9 mg; mp 280.3-281.4 °C;  $^1H$  NMR (400 MHz,  $CDCl_3$ )  $\delta$  8.43 (d,  $J = 6.0$  Hz, 2H), 7.97 (d,  $J = 8.8$  Hz, 1H), 7.91 (d,  $J = 8.1$  Hz, 1H), 7.72 (d,  $J = 8.3$  Hz, 1H), 7.68-7.60 (m, 3H), 7.60-7.51 (m, 4H), 7.49-7.29 (m, 12H), 7.20-7.12 (m, 2H), 7.10-7.01 (m, 3H), 6.98 (d,  $J = 6.8$  Hz, 2H), 5.65 (d,  $J = 7.5$  Hz, 1H), 5.52 (d,  $J = 4.9$  Hz, 1H), 4.53 (dd,  $J = 9.6, 5.0$  Hz, 1H), 2.79 (d,  $J = 3.8$  Hz, 1H);  $^{13}C$  NMR (151 MHz,  $CDCl_3$ )  $\delta$  194.8, 173.2, 170.9, 155.6, 147.2, 137.1, 135.3, 135.1, 131.8, 131.6, 131.3, 131.3, 130.7, 130.3, 130.1, 129.4, 129.3, 128.9, 128.8, 128.7, 128.5, 128.3, 128.3, 128.0, 127.8, 127.7, 127.3, 126.2, 125.6, 125.3, 124.6, 122.6, 119.1, 119.0, 93.0, 88.5, 72.2, 65.7, 55.9, 47.4; HRMS (ESI)  $m/z$  Calcd. for  $C_{52}H_{35}N_3NaO_4^+$  ( $[M+Na]^+$ ) 788.2520, Found 788.2514.

### Compound 9

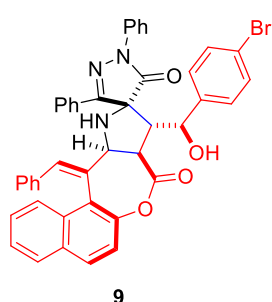

White solid, 88% yield, 65.7 mg; mp 270.8-271.5 °C;  $^1H$  NMR (400 MHz,  $CDCl_3$ )  $\delta$  8.26 (dd,  $J = 6.5, 2.8$  Hz, 2H), 7.98-7.87 (m, 4H), 7.72 (d,  $J = 8.3$  Hz, 1H), 7.58-7.53 (m, 3H), 7.49-7.42 (m, 3H), 7.40-7.35 (m, 1H), 7.33 (d,  $J = 8.9$  Hz, 1H), 7.27-7.22



(m, 3H), 7.09-6.99 (m, 4H), 6.99-6.90 (m, 4H), 5.54 (dd,  $J = 9.8, 2.0$  Hz, 1H), 4.85-4.73 (m, 1H), 4.43 (dd,  $J = 8.4, 5.8$  Hz, 1H), 3.57 (dd,  $J = 9.5, 5.7$  Hz, 1H), 2.70 (d,  $J = 4.1$  Hz, 1H), 2.59 (d,  $J = 6.2$  Hz, 1H);  $^{13}\text{C}$  NMR (101 MHz,  $\text{CDCl}_3$ )  $\delta$  175.2, 169.9, 157.9, 147.2, 139.6, 137.7, 135.0, 131.5, 130.9, 130.6, 130.2, 130.1, 129.5, 128.9, 128.8, 128.8, 128.5, 128.3, 128.1, 127.9, 127.7, 127.6, 126.1, 125.6, 125.2, 124.6, 122.4, 119.0, 73.1, 72.9, 65.5, 52.2, 48.6; HRMS (ESI)  $m/z$  Calcd. for  $\text{C}_{44}\text{H}_{32}\text{BrN}_3\text{NaO}_4^+$  ( $[\text{M}+\text{Na}]^+$ ) 768.1468, Found 768.1457.

### Compound 10

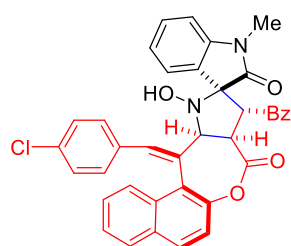

White solid, 93% yield, 58.3 mg; mp 224.3-224.9 °C;  $^1\text{H}$  NMR (400 MHz,  $\text{CDCl}_3$ )  $\delta$  8.00 (d,  $J = 8.9$  Hz, 1H), 7.93 (d,  $J = 8.1$  Hz, 1H), 7.78 (d,  $J = 8.3$  Hz, 1H), 7.53-7.46 (m, 2H), 7.43 (s, 1H), 7.39 (dd,  $J = 11.4, 7.4$  Hz, 2H), 7.30 (d,  $J = 7.4$  Hz, 2H), 7.24-7.11 (m, 3H), 6.97 (d,  $J = 7.2$  Hz, 1H), 6.94-6.80 (m, 5H), 6.37 (d,  $J = 7.7$  Hz, 1H), 6.29 (s, 1H), 5.36 (d,  $J = 6.5$  Hz, 1H), 4.80-4.57 (m, 2H), 2.65 (s, 3H);  $^{13}\text{C}$  NMR (101 MHz,  $\text{CDCl}_3$ )  $\delta$  195.9, 175.1, 169.0, 147.0, 143.5, 136.6, 133.4, 133.3, 132.9, 131.6, 130.6, 130.1, 130.1, 129.8, 128.5, 128.4, 128.2, 128.1, 128.0, 128.0, 127.9, 126.8, 126.3, 124.8, 124.6, 123.3, 122.9, 119.4, 108.1, 74.6, 72.7, 51.9, 44.0, 26.3; HRMS (ESI)  $m/z$  Calcd. for  $\text{C}_{38}\text{H}_{27}\text{ClN}_2\text{NaO}_5^+$  ( $[\text{M}+\text{Na}]^+$ ) 649.1501, Found 649.1504.

## 5. General procedure for catalytic kinetic resolution of ( $\pm$ )-**3/5**

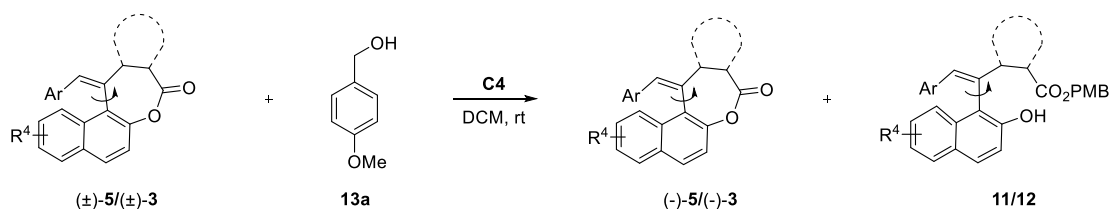

A reaction tube was charged with ( $\pm$ )-**5/3** (1.0 equiv, 0.1 mmol) and DCM (1 mL), then benzyl alcohol (1.0 equiv, 0.1 mmol) and **C4** (0.1 equiv, 0.01 mmol) were added. The reaction was stirred at room temperature for 120 h, then the crude product was purified by column chromatography on silica gel to afford the corresponding **11/12** and the enantioenriched compound ( $-$ )-**5/(-)-3**.

## KR-Compound (-)-5aa

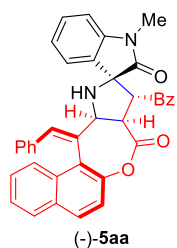

Prepared according to the procedure within 120 h as white solid (24.8 mg, 43% yield);  $[\alpha]_D^{18} = -81.96$  ( $c$  0.33,  $\text{CH}_2\text{Cl}_2$ ); Enantiomeric excess was determined to be 87% (determined by HPLC using chiral AD-H column, hexane/2-propanol = 70/30,  $\lambda = 254$  nm, 30 °C, 0.8 mL/min,  $t_{\text{major}} = 36.6$  min,  $t_{\text{minor}} = 18.2$  min).

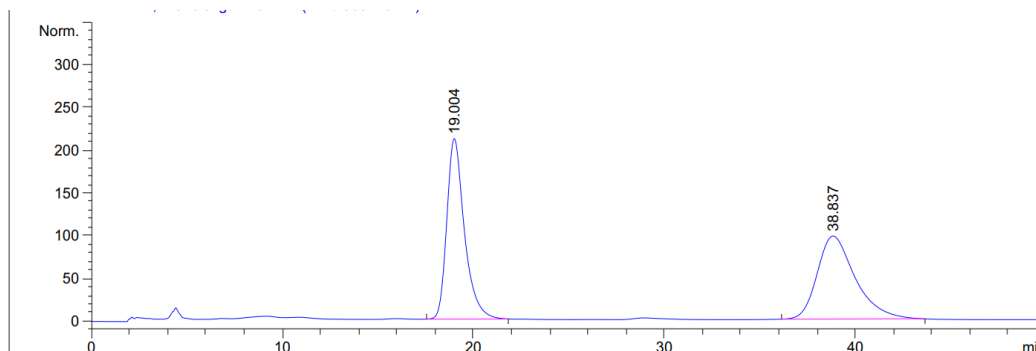

| Peak # | RetTime [min] | Type | Width [min] | Area mAU *s | Height [mAU] | Area %  |
|--------|---------------|------|-------------|-------------|--------------|---------|
| 1      | 19.004        | BB   | 0.9610      | 1.35380e4   | 211.02519    | 50.2160 |
| 2      | 38.837        | BB   | 2.0409      | 1.34216e4   | 97.17712     | 49.7840 |

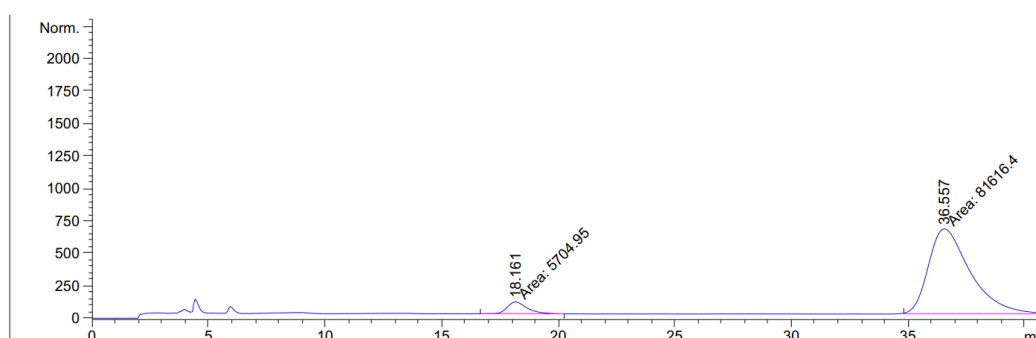

| Peak # | RetTime [min] | Type | Width [min] | Area mAU *s | Height [mAU] | Area %  |
|--------|---------------|------|-------------|-------------|--------------|---------|
| 1      | 18.161        | MM   | 1.0369      | 5704.94580  | 91.69640     | 6.5333  |
| 2      | 36.557        | MM   | 2.0773      | 8.16164e4   | 654.83344    | 93.4667 |

## KR-Compound 11a

Prepared according to the procedure within 120 h as yellow solid (32.2 mg, 45% yield,  $dr > 20:1$ ); mp 115.3-116.3 °C;  $[\alpha]_D^{18} = 45.97$  ( $c$  0.30,  $\text{CH}_2\text{Cl}_2$ );  $^1\text{H}$  NMR (400 MHz,  $\text{CDCl}_3$ )  $\delta$  7.79-7.73 (m, 2H), 7.70 (d,  $J = 8.7$  Hz, 1H), 7.47 (s, 1H), 7.40-7.34 (m, 1H), 7.31-7.24 (m, 4H), 7.22-7.16 (m, 3H), 7.13 (d,  $J = 8.5$  Hz, 2H), 7.10-6.99 (m, 5H), 6.98-6.87 (m, 4H), 6.74 (d,  $J = 8.6$  Hz, 2H), 6.34 (d,  $J = 7.7$  Hz, 1H), 5.16 (d,  $J = 8.3$  Hz, 1H), 5.00 (d,  $J = 9.0$  Hz, 1H), 4.96 (d,  $J = 12.1$  Hz, 1H), 4.63 (d,  $J = 12.0$  Hz, 1H),

4.42 (t,  $J = 8.6$  Hz, 1H), 3.73 (s, 3H), 2.82 (s, 3H);  $^{13}\text{C}$  NMR (101 MHz,  $\text{CDCl}_3$ )  $\delta$  196.3, 176.0, 172.0, 159.6, 151.5, 142.6, 136.8, 135.9, 135.7, 133.1, 132.8, 132.4, 130.2, 130.1, 129.5, 129.3, 128.6, 128.6, 128.4, 128.2, 128.1, 128.0, 127.9, 127.8, 127.3, 126.7, 124.9, 124.3, 123.2, 118.9, 117.8, 113.9, 108.1, 69.2, 67.3, 66.6, 58.8, 55.2, 49.9, 26.2; HRMS (ESI)  $m/z$  Calcd. for  $\text{C}_{46}\text{H}_{38}\text{N}_2\text{NaO}_6^+$  ( $[\text{M}+\text{Na}]^+$ ) 737.2622, Found 737.2623; Enantiomeric excess was determined to be 95% (determined by HPLC using chiral IF column, hexane/2-propanol = 70/30,  $\lambda = 254$  nm, 30 °C, 0.8 mL/min,  $t_{\text{major}} = 43.1$  min,  $t_{\text{minor}} = 39.6$  min).

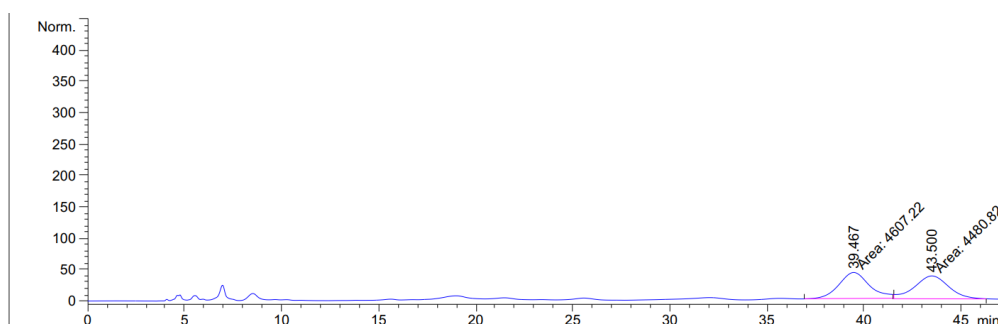

| Peak # | RetTime [min] | Type | Width [min] | Area mAU *s | Height [mAU] | Area %  |
|--------|---------------|------|-------------|-------------|--------------|---------|
| 1      | 39.467        | MM   | 1.8415      | 4607.22119  | 41.69859     | 50.6954 |
| 2      | 43.500        | MM   | 2.0440      | 4480.82422  | 36.53603     | 49.3046 |

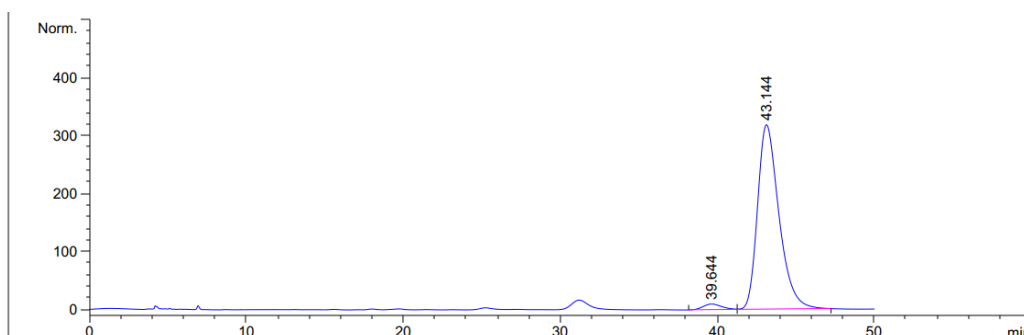

| Peak # | RetTime [min] | Type | Width [min] | Area mAU *s | Height [mAU] | Area %  |
|--------|---------------|------|-------------|-------------|--------------|---------|
| 1      | 39.644        | BV   | 1.1460      | 810.93097   | 9.76956      | 2.6144  |
| 2      | 43.144        | VB   | 1.4427      | 3.02075e4   | 318.11502    | 97.3856 |

### KR-Compound (-)-5aa

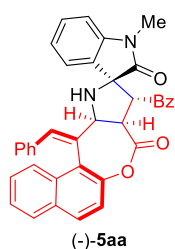

Prepared according to the procedure within 120 h as white solid (28.8 mg, 50% yield);  $[\alpha]_D^{18} = -85.58$  ( $c$  0.10,  $\text{CH}_2\text{Cl}_2$ ); Enantiomeric excess was determined to be 81% (determined by HPLC using chiral AD-H column, hexane/2-propanol = 70/30,  $\lambda = 254$  nm, 30 °C, 0.8 mL/min,  $t_{\text{major}} = 31.3$  min,  $t_{\text{minor}} = 16.4$  min).

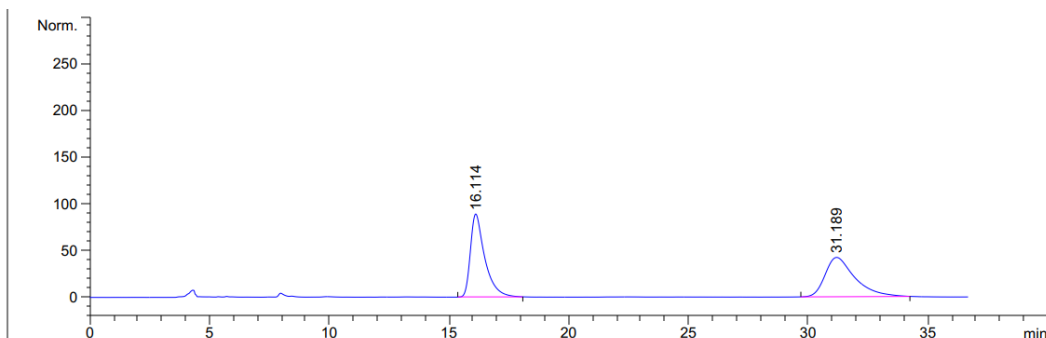

| Peak # | RetTime [min] | Type | Width [min] | Area mAU *s | Height [mAU] | Area %  |
|--------|---------------|------|-------------|-------------|--------------|---------|
| 1      | 16.114        | BB   | 0.6077      | 3701.55396  | 88.69800     | 50.3819 |
| 2      | 31.189        | BB   | 1.2348      | 3645.43579  | 42.02409     | 49.6181 |

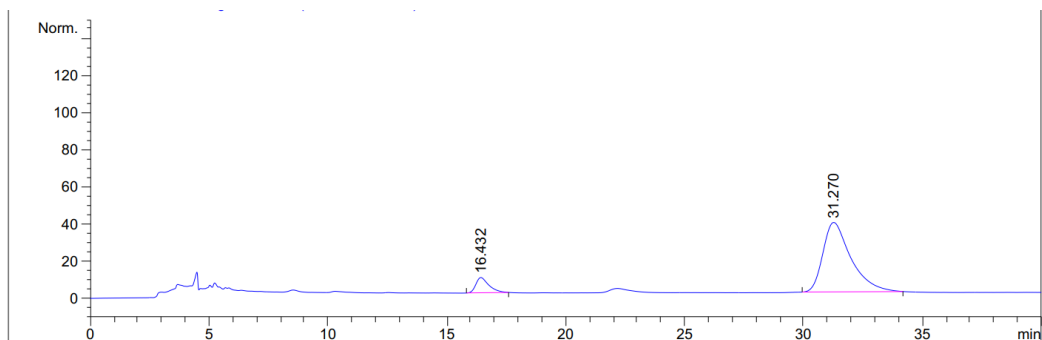

| Peak # | RetTime [min] | Type | Width [min] | Area mAU *s | Height [mAU] | Area %  |
|--------|---------------|------|-------------|-------------|--------------|---------|
| 1      | 16.432        | BB   | 0.5595      | 316.08011   | 8.24217      | 9.3439  |
| 2      | 31.270        | BB   | 1.1894      | 3066.65015  | 37.35004     | 90.6561 |

### KR-Compound 11b

Prepared according to the procedure within 120 h as white solid (29.3 mg, 41% yield, dr > 20:1); mp 117.4-118.4 °C;  $[\alpha]_D^{18} = 24.55$  (c 0.11, CH<sub>2</sub>Cl<sub>2</sub>); <sup>1</sup>H NMR (600 MHz, CDCl<sub>3</sub>) δ 7.79-7.74 (m, 2H), 7.71-7.68 (m, 1H), 7.50 (s, 1H), 7.41-7.37 (m, 1H), 7.32-7.27 (m, 4H), 7.22-7.15 (m, 4H), 7.13-7.09 (m, 1H), 7.07-7.03 (m, 2H), 7.03-6.99 (m, 2H), 6.94-6.90 (m, 3H), 6.81-6.75 (m, 3H), 6.37 (d, *J* = 7.7 Hz, 1H), 5.19 (d, *J* = 8.3 Hz, 1H), 5.03 (d, *J* = 9.0 Hz, 1H), 4.99 (d, *J* = 12.5 Hz, 1H), 4.66 (d, *J* = 12.5 Hz, 1H), 4.43 (t, *J* = 8.6 Hz, 1H), 3.72 (s, 3H), 2.84 (s, 3H); <sup>13</sup>C NMR (151 MHz, CDCl<sub>3</sub>) δ 196.4, 176.1, 171.9, 159.7, 151.4, 142.6, 136.7, 136.7, 135.8, 135.7, 133.2, 132.8, 132.4, 130.2, 129.5, 129.3, 128.8, 128.5, 128.4, 128.1, 128.0, 127.8, 127.8, 126.7, 124.9, 124.3, 123.2, 123.2, 120.4, 118.9, 117.6, 114.4, 113.1, 108.1, 69.1, 67.2, 66.5, 58.7, 55.2, 49.8, 26.2; HRMS (ESI) *m/z* Calcd. for C<sub>46</sub>H<sub>38</sub>N<sub>2</sub>NaO<sub>6</sub><sup>+</sup> ([M+Na]<sup>+</sup>) 737.2622, Found 737.2623; Enantiomeric excess was determined to be 84%

(determined by HPLC using chiral IF column, hexane/2-propanol = 70/30,  $\lambda = 254$  nm, 30 °C, 0.8 mL/min,  $t_{\text{major}} = 32.3$  min,  $t_{\text{minor}} = 37.4$  min).

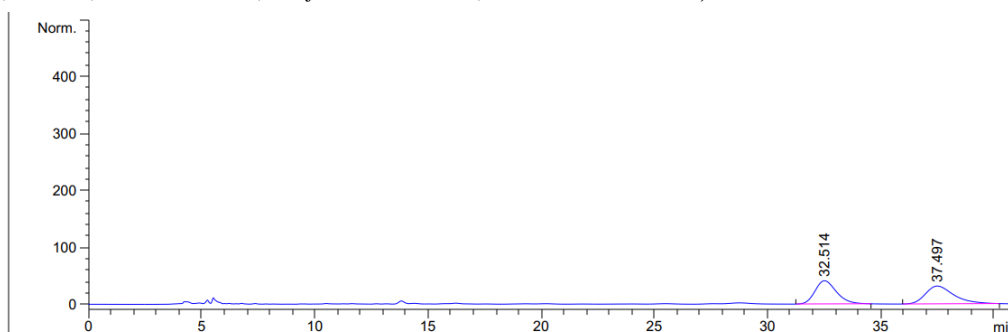

| Peak # | RetTime [min] | Type | Width [min] | Area mAU *s | Height [mAU] | Area %  |
|--------|---------------|------|-------------|-------------|--------------|---------|
| 1      | 32.514        | BB   | 0.9918      | 2694.08643  | 40.79220     | 49.5111 |
| 2      | 37.497        | BB   | 1.2838      | 2747.28809  | 31.32636     | 50.4889 |

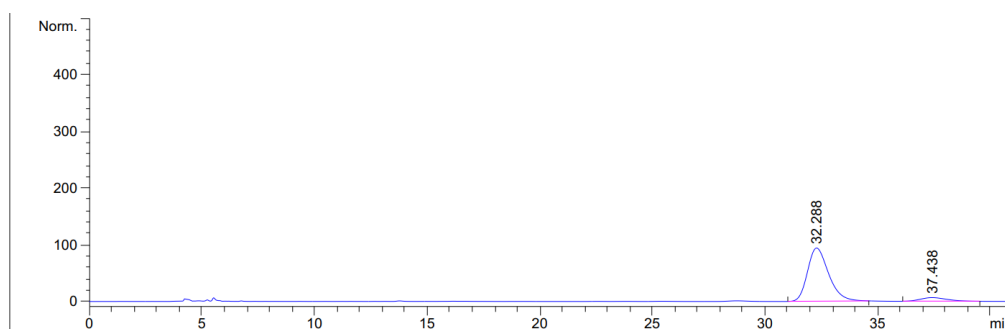

| Peak # | RetTime [min] | Type | Width [min] | Area mAU *s | Height [mAU] | Area %  |
|--------|---------------|------|-------------|-------------|--------------|---------|
| 1      | 32.288        | BB   | 0.9947      | 6102.79004  | 93.82372     | 92.0295 |
| 2      | 37.438        | BB   | 0.9880      | 528.55176   | 6.41158      | 7.9705  |

### KR-Compound (-)-5ba

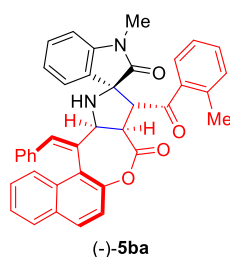

Prepared according to the procedure within 120 h as white solid (23.6 mg, 40% yield);  $[\alpha]_D^{18} = -103.61$  ( $c$  0.53,  $\text{CH}_2\text{Cl}_2$ ); Enantiomeric excess was determined to be 83% (determined by HPLC using chiral AD-H column, hexane/2-propanol = 70/30,  $\lambda = 254$  nm, 30 °C, 0.8 mL/min,  $t_{\text{major}} = 26.4$  min,  $t_{\text{minor}} = 14.7$  min).

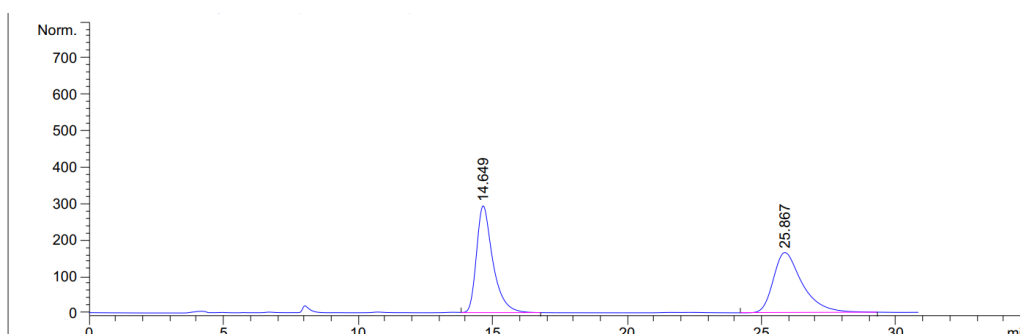

| Peak # | RetTime [min] | Type | Width [min] | Area mAU *s | Height [mAU] | Area %  |
|--------|---------------|------|-------------|-------------|--------------|---------|
| 1      | 14.649        | VB   | 0.6272      | 1.24114e4   | 293.53619    | 50.1739 |
| 2      | 25.867        | VB   | 1.1200      | 1.23254e4   | 165.08441    | 49.8261 |

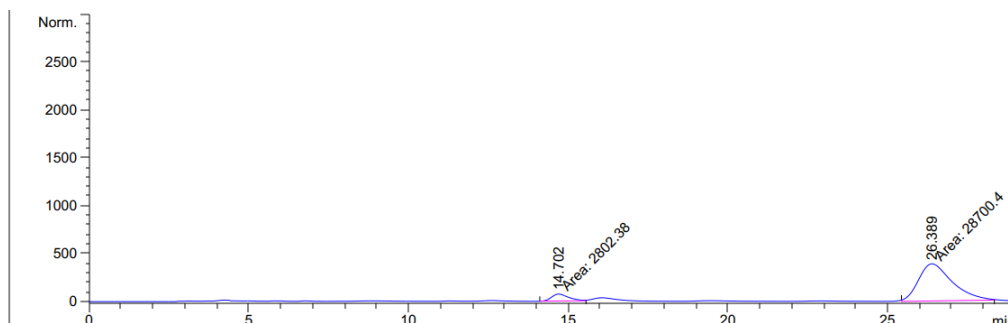

| Peak # | RetTime [min] | Type | Width [min] | Area mAU *s | Height [mAU] | Area %  |
|--------|---------------|------|-------------|-------------|--------------|---------|
| 1      | 14.702        | MM   | 0.6357      | 2802.38013  | 73.47230     | 8.8957  |
| 2      | 26.389        | MM   | 1.2307      | 2.87004e4   | 388.66211    | 91.1043 |

### KR-Compound 11c

Prepared according to the procedure within 120 h as yellow solid (34.3 mg, 47% yield, dr > 20:1); mp 128.3-129.2 °C;  $[\alpha]_D^{18} = 48.70$  (c 0.46, CH<sub>2</sub>Cl<sub>2</sub>); <sup>1</sup>H NMR (400 MHz, CDCl<sub>3</sub>) δ 7.78-7.72 (m, 2H), 7.71-7.65 (m, 1H), 7.59 (s, 1H), 7.41 (d, *J* = 7.3 Hz, 1H), 7.27-7.15 (m, 7H), 7.10-6.88 (m, 10H), 6.74 (d, *J* = 8.6 Hz, 2H), 6.46 (d, *J* = 7.8 Hz, 1H), 5.18 (d, *J* = 10.2 Hz, 1H), 5.02 (d, *J* = 10.0 Hz, 1H), 4.85 (d, *J* = 12.0 Hz, 1H), 4.55 (d, *J* = 12.0 Hz, 1H), 4.44 (t, *J* = 10.0 Hz, 1H), 3.74 (s, 3H), 2.65 (s, 3H), 1.57 (s, 3H); <sup>13</sup>C NMR (151 MHz, CDCl<sub>3</sub>) δ 198.3, 175.7, 171.9, 159.6, 151.7, 142.9, 138.7, 136.4, 136.0, 135.8, 134.3, 132.2, 131.5, 131.0, 130.2, 130.1, 129.8, 129.3, 129.0, 128.6, 128.4, 128.1, 127.8, 127.2, 126.6, 125.1, 124.7, 124.5, 123.3, 123.1, 119.0, 117.7, 113.8, 108.4, 68.7, 67.3, 65.6, 60.0, 55.2, 49.3, 26.0, 19.5; HRMS (ESI) *m/z* Calcd. for C<sub>47</sub>H<sub>40</sub>N<sub>2</sub>NaO<sub>6</sub><sup>+</sup> ([M+Na]<sup>+</sup>) 751.2779, Found 751.2777; Enantiomeric excess was determined to be 93% (determined by HPLC using chiral AD-H column, hexane/2-propanol = 80/20, λ = 254 nm, 30 °C, 0.8 mL/min, *t*<sub>major</sub> = 25.9 min, *t*<sub>minor</sub> = 24.3 min).

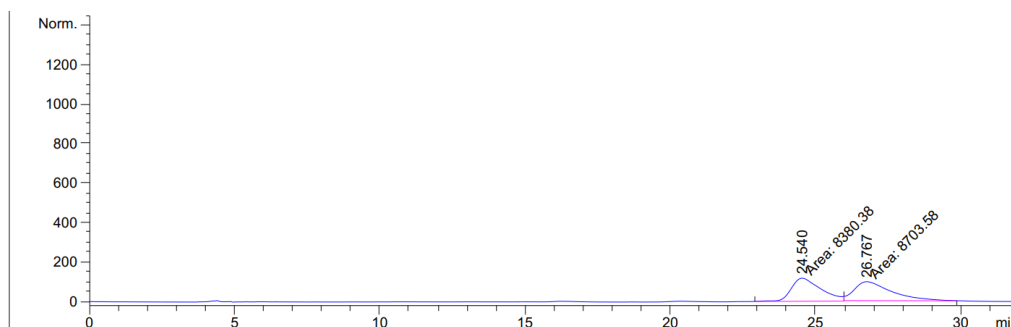

| Peak # | RetTime [min] | Type | Width [min] | Area mAU *s | Height [mAU] | Area %  |
|--------|---------------|------|-------------|-------------|--------------|---------|
| 1      | 24.540        | MM   | 1.1936      | 8380.37793  | 117.01920    | 49.0541 |
| 2      | 26.767        | MM   | 1.5030      | 8703.57520  | 96.51168     | 50.9459 |

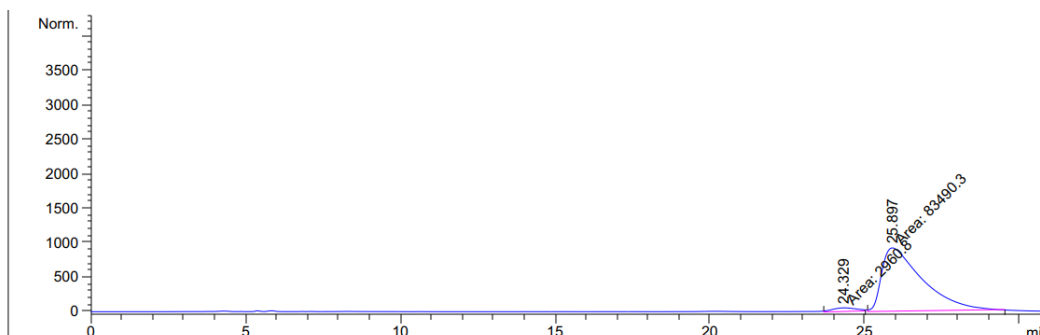

| Peak # | RetTime [min] | Type | Width [min] | Area mAU *s | Height [mAU] | Area %  |
|--------|---------------|------|-------------|-------------|--------------|---------|
| 1      | 24.329        | MM   | 0.9213      | 2960.79810  | 53.56044     | 3.4248  |
| 2      | 25.897        | MM   | 1.5172      | 8.34903e4   | 917.13824    | 96.5752 |

### KR-Compound (-)-5ca

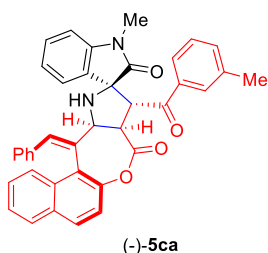

Prepared according to the procedure within 120 h as white solid (27.2 mg, 46% yield);  $[\alpha]_D^{18} = -91.62$  ( $c$  0.57,  $\text{CH}_2\text{Cl}_2$ ); Enantiomeric excess was determined to be 75% (determined by HPLC using chiral AD-H column, hexane/2-propanol = 70/30,  $\lambda = 254$  nm,  $30$  °C,  $0.8$  mL/min,  $t_{\text{major}} = 20.7$  min,  $t_{\text{minor}} = 17.1$  min).

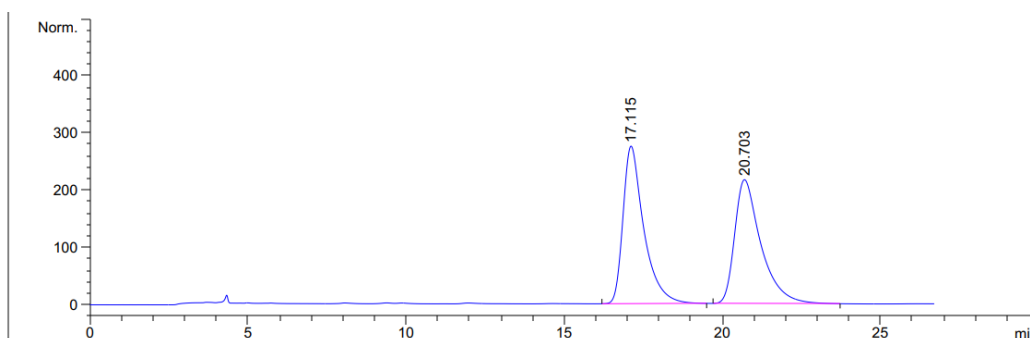

| Peak # | RetTime [min] | Type | Width [min] | Area mAU *s | Height [mAU] | Area %  |
|--------|---------------|------|-------------|-------------|--------------|---------|
| 1      | 17.115        | BB   | 0.6765      | 1.25966e4   | 275.31207    | 50.2127 |
| 2      | 20.703        | BB   | 0.8569      | 1.24899e4   | 216.35785    | 49.7873 |

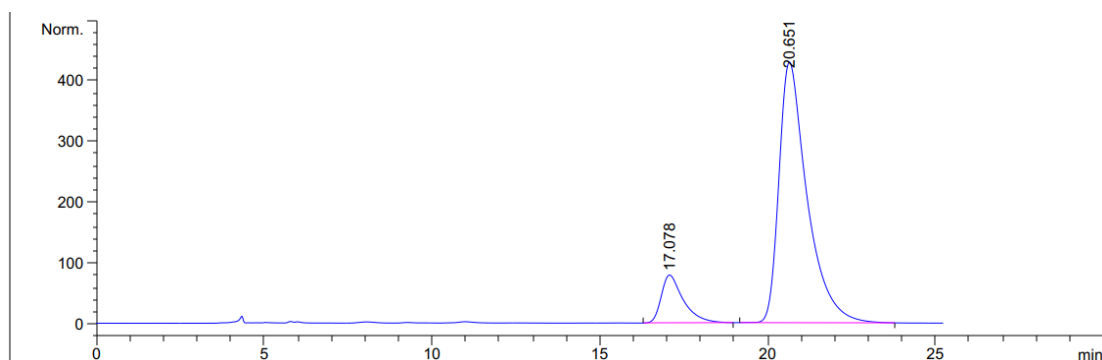

| Peak # | RetTime [min] | Type | Width [min] | Area mAU *s | Height [mAU] | Area %  |
|--------|---------------|------|-------------|-------------|--------------|---------|
| 1      | 17.078        | BB   | 0.6719      | 3592.34595  | 78.75780     | 12.5621 |
| 2      | 20.651        | BB   | 0.8557      | 2.50044e4   | 428.36392    | 87.4379 |

### KR-Compound 11d

Prepared according to the procedure within 120 h as light yellow solid (32.1 mg, 44% yield, dr > 20:1); mp 127.7-128.6 °C;  $[\alpha]_D^{18} = 49.54$  (c 0.54, CH<sub>2</sub>Cl<sub>2</sub>); <sup>1</sup>H NMR (400 MHz, CDCl<sub>3</sub>) δ 7.83-7.65 (m, 3H), 7.48-7.40 (m, 1H), 7.28-6.96 (m, 15H), 6.94-6.85 (m, 3H), 6.75 (d, *J* = 4.1 Hz, 2H), 6.34 (d, *J* = 4.6 Hz, 1H), 5.14 (d, *J* = 4.8 Hz, 1H), 5.04-4.91 (m, 2H), 4.68 (d, *J* = 11.0 Hz, 1H), 4.45-4.33 (m, 1H), 3.73 (s, 3H), 2.84 (s, 3H), 2.22 (s, 3H); <sup>13</sup>C NMR (101 MHz, CDCl<sub>3</sub>) δ 196.7, 176.2, 172.3, 159.6, 151.4, 142.7, 137.9, 136.9, 135.7, 135.6, 133.5, 133.2, 132.4, 130.2, 129.3, 129.0, 128.5, 128.4, 128.3, 128.1, 127.8, 127.8, 127.3, 126.7, 125.0, 124.9, 124.3, 123.2, 123.2, 118.9, 117.9, 113.9, 108.0, 69.2, 67.3, 66.7, 59.1, 55.2, 50.0, 26.1, 21.1; HRMS (ESI) *m/z* Calcd. for C<sub>47</sub>H<sub>40</sub>N<sub>2</sub>NaO<sub>6</sub><sup>+</sup> ([M+Na]<sup>+</sup>) 751.2779, Found 751.2783; Enantiomeric excess was determined to be 95% (determined by HPLC using chiral AD-H column, hexane/2-propanol = 70/30, λ = 254 nm, 30 °C, 0.8 mL/min, *t*<sub>major</sub> = 15.4 min, *t*<sub>minor</sub> = 24.6 min).

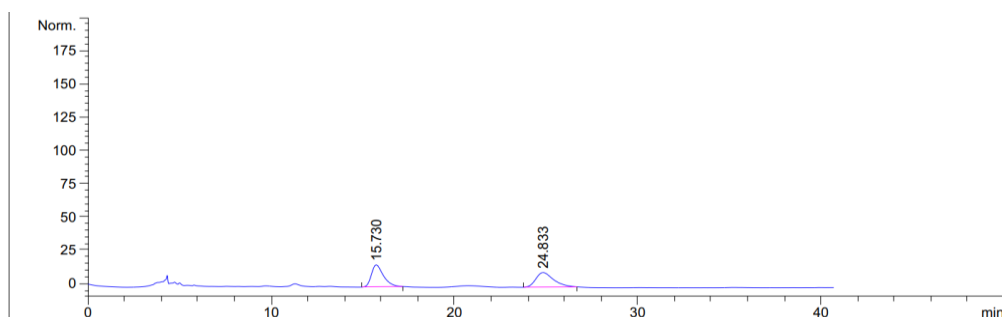

| Peak # | RetTime [min] | Type | Width [min] | Area mAU *s | Height [mAU] | Area %  |
|--------|---------------|------|-------------|-------------|--------------|---------|
| 1      | 15.730        | BB   | 0.6895      | 769.15942   | 16.63080     | 50.7142 |
| 2      | 24.833        | BB   | 0.9690      | 747.49695   | 11.03998     | 49.2858 |



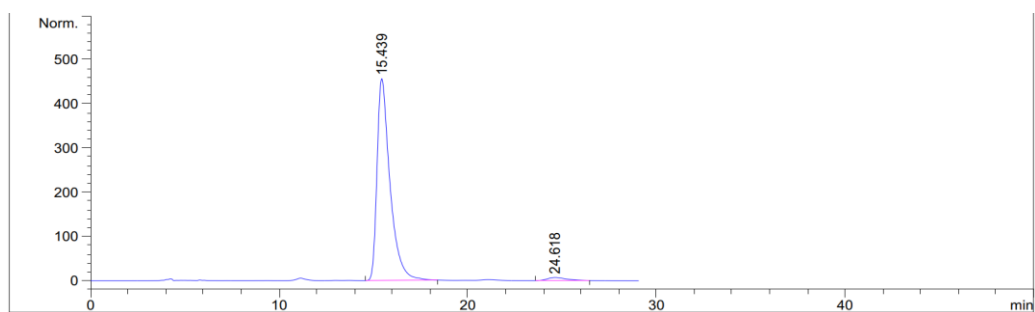

| Peak # | RetTime [min] | Type | Width [min] | Area mAU *s | Height [mAU] | Area %  |
|--------|---------------|------|-------------|-------------|--------------|---------|
| 1      | 15.439        | PB   | 0.7064      | 2.17568e4   | 456.18036    | 97.7764 |
| 2      | 24.618        | BB   | 0.8318      | 494.78287   | 7.15261      | 2.2236  |

### KR-Compound (-)-5ea

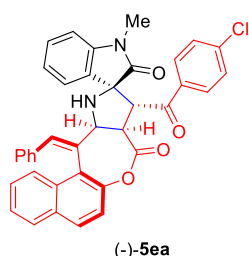

Prepared according to the procedure within 120 h as white solid (29.3 mg, 48% yield);  $[\alpha]_D^{18} = -64.10$  ( $c$  0.61,  $\text{CH}_2\text{Cl}_2$ ); Enantiomeric excess was determined to be 74% (determined by HPLC using chiral IA column, hexane/2-propanol = 70/30,  $\lambda = 254$  nm,  $30^\circ\text{C}$ ,  $0.8$  mL/min,  $t_{\text{major}} = 29.7$  min,  $t_{\text{minor}} = 17.4$  min).

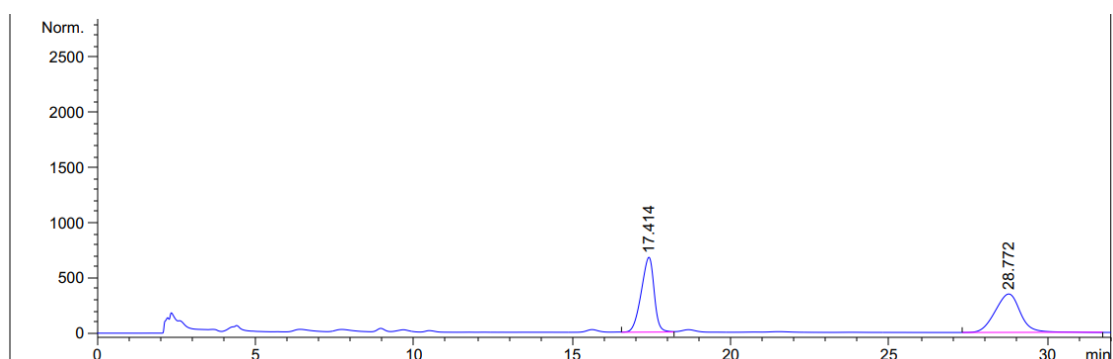

| Peak # | RetTime [min] | Type | Width [min] | Area mAU *s | Height [mAU] | Area %  |
|--------|---------------|------|-------------|-------------|--------------|---------|
| 1      | 17.414        | VV   | 0.4365      | 1.93193e4   | 679.66736    | 49.7622 |
| 2      | 28.772        | BB   | 0.8542      | 1.95040e4   | 349.10599    | 50.2378 |

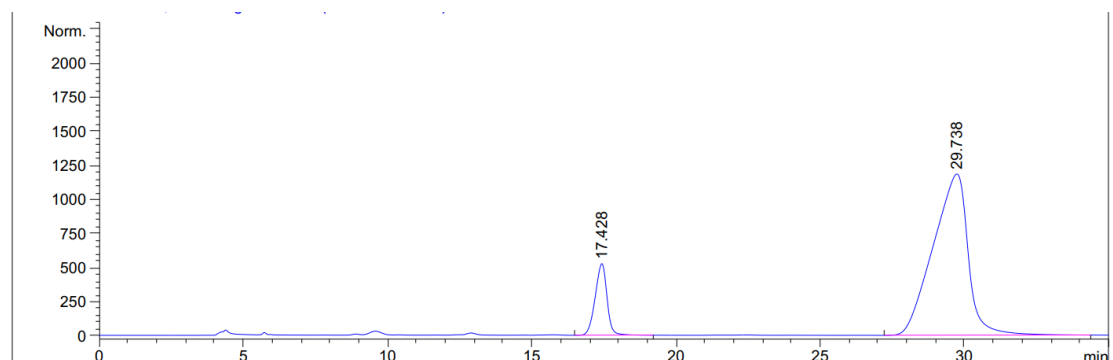

| Peak # | RetTime [min] | Type | Width [min] | Area mAU *s | Height [mAU] | Area %  |
|--------|---------------|------|-------------|-------------|--------------|---------|
| 1      | 17.428        | VB   | 0.4430      | 1.49512e4   | 524.87366    | 13.0048 |
| 2      | 29.738        | PB   | 1.2152      | 1.00015e5   | 1182.66589   | 86.9952 |

### KR-Compound 11e

Prepared according to the procedure within 120 h as light yellow solid (32.2 mg, 43% yield, dr > 20:1); mp 138.8-139.7 °C;  $[\alpha]_D^{18} = 33.69$  (*c* 0.47, CH<sub>2</sub>Cl<sub>2</sub>); <sup>1</sup>H NMR (400 MHz, CDCl<sub>3</sub>) δ 7.80-7.74 (m, 2H), 7.71-7.64 (m, 1H), 7.45 (s, 1H), 7.30-7.23 (m, 5H), 7.22-7.17 (m, 3H), 7.14-7.09 (m, 3H), 7.07-6.98 (m, 4H), 6.94-6.89 (m, 3H), 6.74 (d, *J* = 8.6 Hz, 2H), 6.43 (d, *J* = 7.8 Hz, 1H), 5.11 (d, *J* = 8.5 Hz, 1H), 4.98 (d, *J* = 9.0 Hz, 1H), 4.93 (d, *J* = 12.0 Hz, 1H), 4.62 (d, *J* = 12.0 Hz, 1H), 4.39 (t, *J* = 8.7 Hz, 1H), 3.75 (s, 3H), 2.90 (s, 3H); <sup>13</sup>C NMR (101 MHz, CDCl<sub>3</sub>) δ 195.2, 176.0, 171.8, 159.7, 151.5, 142.5, 139.3, 135.9, 135.6, 135.0, 133.2, 132.3, 130.2, 130.2, 129.6, 129.3, 129.3, 128.7, 128.5, 128.4, 128.3, 128.1, 127.8, 127.1, 126.7, 125.0, 124.3, 123.3, 123.2, 118.9, 117.7, 113.8, 108.2, 69.1, 67.3, 66.4, 58.5, 55.2, 50.1, 26.3; HRMS (ESI) *m/z* Calcd. for C<sub>46</sub>H<sub>38</sub>ClN<sub>2</sub>O<sub>6</sub><sup>+</sup> ([M+H]<sup>+</sup>) 749.2413, Found 749.2417; Enantiomeric excess was determined to be 95% (determined by HPLC using chiral AD-H column, hexane/2-propanol = 70/30, λ = 254 nm, 30 °C, 0.8 mL/min, *t*<sub>major</sub> = 16.0 min, *t*<sub>minor</sub> = 21.6 min).

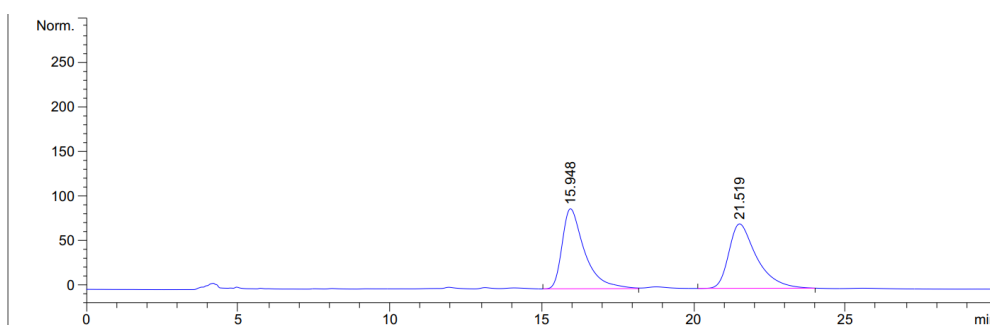

| Peak # | RetTime [min] | Type | Width [min] | Area mAU *s | Height [mAU] | Area %  |
|--------|---------------|------|-------------|-------------|--------------|---------|
| 1      | 15.948        | VB   | 0.7562      | 4625.69336  | 89.66066     | 50.1160 |
| 2      | 21.519        | VB   | 0.9403      | 4604.28760  | 72.22054     | 49.8840 |

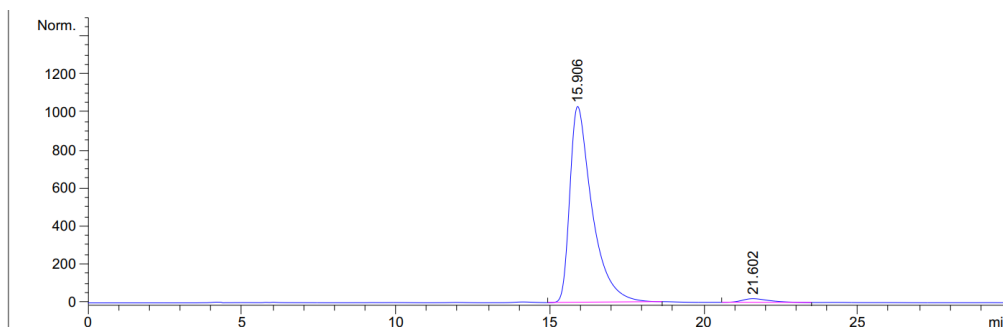

| Peak # | RetTime [min] | Type | Width [min] | Area mAU *s | Height [mAU] | Area %  |
|--------|---------------|------|-------------|-------------|--------------|---------|
| 1      | 15.906        | VB   | 0.7389      | 5.17520e4   | 1030.22009   | 97.7430 |
| 2      | 21.602        | BB   | 0.8887      | 1195.00354  | 19.48572     | 2.2570  |

### KR-Compound (-)-5ga

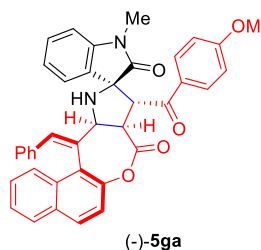

Prepared according to the procedure within 120 h as white solid (29.1 mg, 48% yield);  $[\alpha]_D^{18} = -48.58$  (*c* 0.42, CH<sub>2</sub>Cl<sub>2</sub>); Enantiomeric excess was determined to be 55% (determined by HPLC using chiral AD-H column, hexane/2-propanol = 70/30,  $\lambda = 254$  nm, 30 °C, 0.8 mL/min,  $t_{\text{major}} = 41.8$  min,  $t_{\text{minor}} = 19.8$  min).

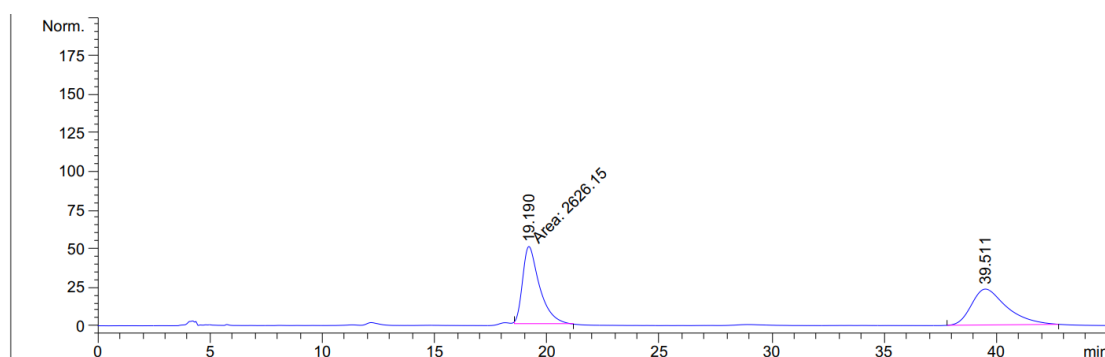

| Peak # | RetTime [min] | Type | Width [min] | Area mAU *s | Height [mAU] | Area %  |
|--------|---------------|------|-------------|-------------|--------------|---------|
| 1      | 19.190        | MM   | 0.8749      | 2626.14502  | 50.02713     | 50.6493 |
| 2      | 39.511        | BB   | 1.3938      | 2558.81299  | 23.29235     | 49.3507 |

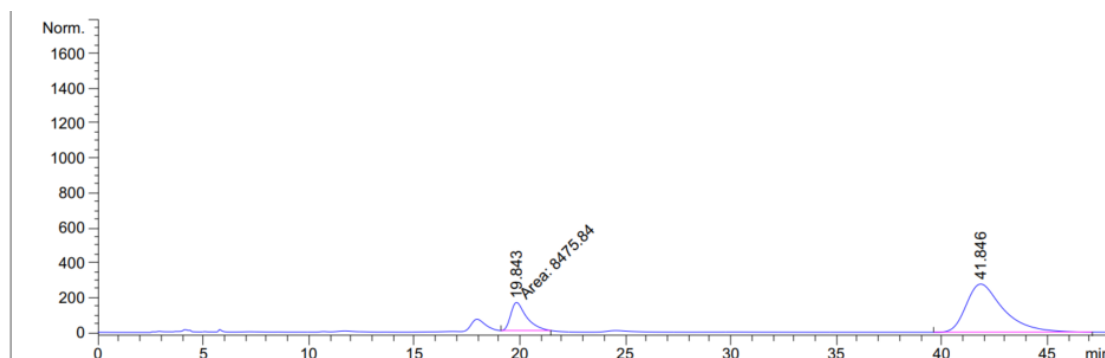

| Peak # | RetTime [min] | Type | Width [min] | Area mAU *s | Height [mAU] | Area %  |
|--------|---------------|------|-------------|-------------|--------------|---------|
| 1      | 19.843        | MM   | 0.8714      | 8475.84277  | 162.10759    | 20.0251 |
| 2      | 41.846        | BB   | 1.7965      | 3.38502e4   | 276.51852    | 79.9749 |

## KR-Compound 11f

Prepared according to the procedure within 120 h as yellow solid (27.6 mg, 37% yield, dr > 20:1); mp 122.5-123.4 °C;  $[\alpha]_D^{18} = 24.37$  (c 0.12, CH<sub>2</sub>Cl<sub>2</sub>); <sup>1</sup>H NMR (600 MHz, CDCl<sub>3</sub>) δ 7.78-7.74 (m, 2H), 7.71-7.68 (m, 1H), 7.45 (s, 1H), 7.37 (d, *J* = 8.8 Hz, 2H), 7.30-7.26 (m, 2H), 7.20 (d, *J* = 8.9 Hz, 1H), 7.14-6.98 (m, 8H), 6.93-6.89 (m, 3H), 6.74 (d, *J* = 8.6 Hz, 2H), 6.70 (d, *J* = 8.8 Hz, 2H), 6.43 (d, *J* = 7.6 Hz, 1H), 5.12 (d, *J* = 8.3 Hz, 1H), 4.98 (d, *J* = 9.0 Hz, 1H), 4.94 (d, *J* = 12.0 Hz, 1H), 4.65 (d, *J* = 12.0 Hz, 1H), 4.42 (t, *J* = 8.6 Hz, 1H), 3.79 (s, 3H), 3.75 (s, 3H), 2.93 (s, 3H); <sup>13</sup>C NMR (151 MHz, CDCl<sub>3</sub>) δ 194.4, 176.3, 172.2, 163.4, 159.6, 151.4, 142.5, 135.7, 135.7, 133.3, 132.3, 130.3, 130.2, 130.1, 129.6, 129.3, 129.3, 128.9, 128.7, 128.5, 128.4, 128.1, 127.8, 127.2, 126.7, 125.0, 124.3, 123.2, 118.9, 117.9, 113.8, 113.2, 108.0, 69.4, 67.2, 66.6, 58.1, 55.4, 55.2, 50.2, 26.3; HRMS (ESI) *m/z* Calcd. for C<sub>47</sub>H<sub>40</sub>N<sub>2</sub>NaO<sub>7</sub><sup>+</sup> ([M+Na]<sup>+</sup>) 767.2728, Found 767.2733; Enantiomeric excess was determined to be 97% (determined by HPLC using chiral AD-H column, hexane/2-propanol = 70/30, λ = 254 nm, 30 °C, 0.8 mL/min, *t*<sub>major</sub> = 17.9 min, *t*<sub>minor</sub> = 32.3 min).

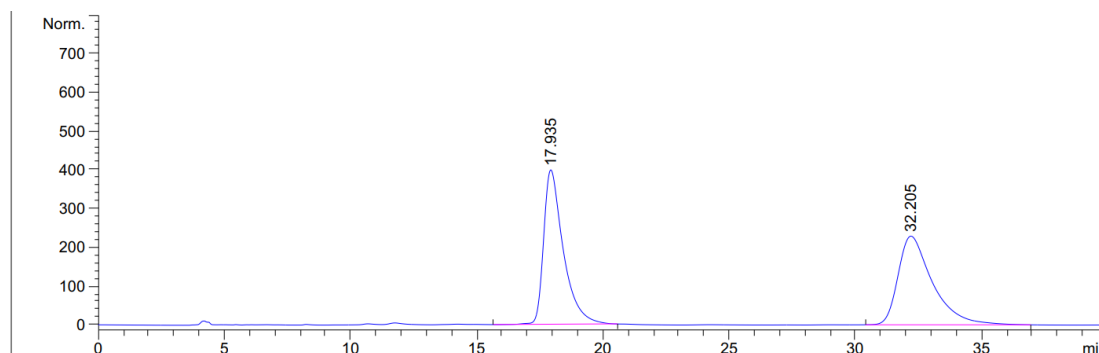

| Peak # | RetTime [min] | Type | Width [min] | Area mAU * s | Height [mAU] | Area %  |
|--------|---------------|------|-------------|--------------|--------------|---------|
| 1      | 17.935        | VB   | 0.8048      | 2.16064e4    | 398.24280    | 49.9229 |
| 2      | 32.205        | BB   | 1.3864      | 2.16731e4    | 228.75539    | 50.0771 |

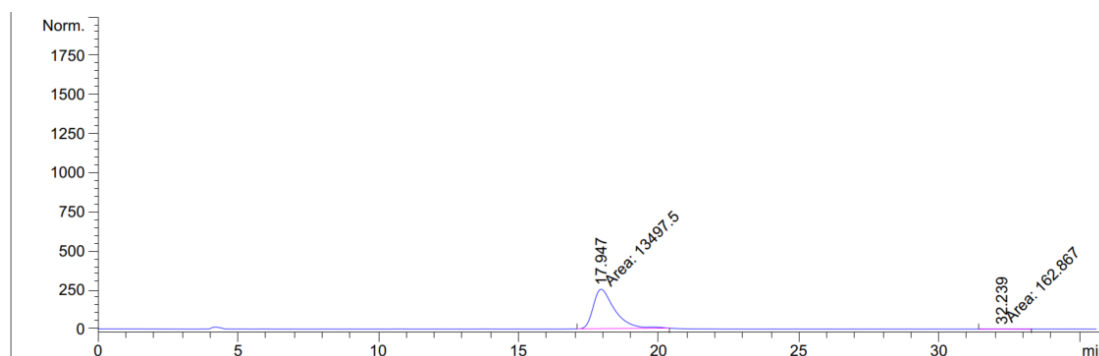

| Peak # | RetTime [min] | Type | Width [min] | Area mAU *s | Height [mAU] | Area %  |
|--------|---------------|------|-------------|-------------|--------------|---------|
| 1      | 17.947        | MM   | 0.8912      | 1.34975e4   | 252.41469    | 98.8077 |
| 2      | 32.239        | MM   | 0.9383      | 162.86671   | 2.04505      | 1.1923  |

### KR-Compound (-)-5ia

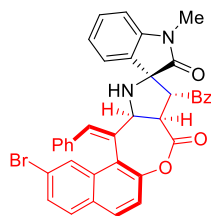

(-)-5ia

Prepared according to the procedure within 120 h as white solid (28.2 mg, 43% yield);  $[\alpha]_D^{18} = -35.00$  (*c* 0.08, CH<sub>2</sub>Cl<sub>2</sub>); Enantiomeric excess was determined to be 93% (determined by HPLC using chiral AD-H column, hexane/2-propanol = 70/30,  $\lambda = 254$  nm, 30 °C, 0.8 mL/min,  $t_{\text{major}} = 36.8$  min,  $t_{\text{minor}} = 18.4$  min).

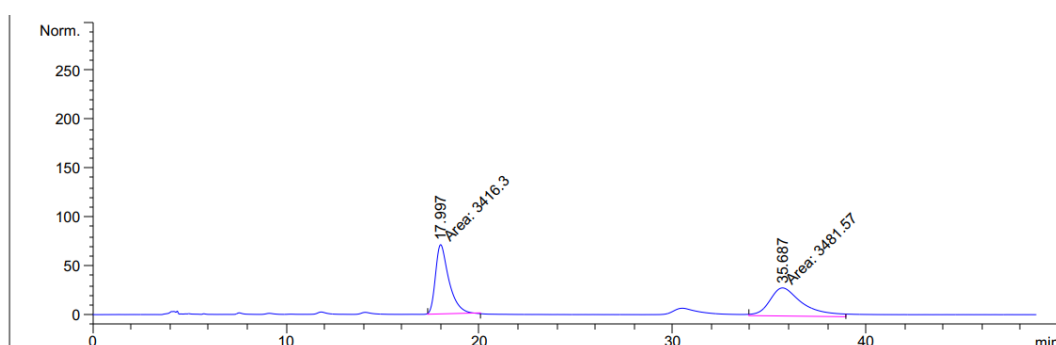

| Peak # | RetTime [min] | Type | Width [min] | Area mAU *s | Height [mAU] | Area %  |
|--------|---------------|------|-------------|-------------|--------------|---------|
| 1      | 17.997        | MM   | 0.8025      | 3416.30371  | 70.95149     | 49.5269 |
| 2      | 35.687        | MM   | 2.0146      | 3481.56934  | 28.80315     | 50.4731 |

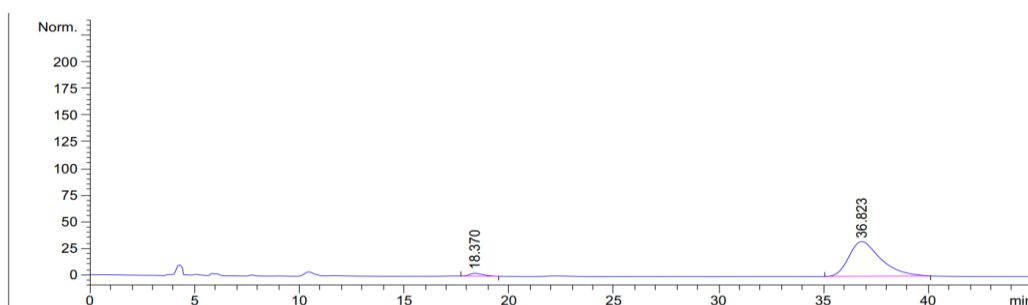

| Peak # | RetTime [min] | Type | Width [min] | Area mAU *s | Height [mAU] | Area %  |
|--------|---------------|------|-------------|-------------|--------------|---------|
| 1      | 18.370        | BB   | 0.5868      | 117.43487   | 2.67311      | 3.2681  |
| 2      | 36.823        | BB   | 1.5031      | 3475.93750  | 32.67674     | 96.7319 |

### KR-Compound 11g

Prepared according to the procedure within 120 h as light yellow solid (34.9 mg, 44% yield, dr > 20:1); mp 130.2-131.2 °C;  $[\alpha]_D^{18} = 17.07$  (*c* 0.33, CH<sub>2</sub>Cl<sub>2</sub>); <sup>1</sup>H NMR (600 MHz, CDCl<sub>3</sub>)  $\delta$  7.86-7.83 (m, 1H), 7.71 (d, *J* = 8.9 Hz, 1H), 7.61 (d, *J* = 8.6 Hz, 1H), 7.41 (s, 1H), 7.40-7.36 (m, 1H), 7.33-7.29 (m, 3H), 7.24-7.19 (m, 3H), 7.14-7.09 (m,

4H), 7.06-6.95 (m, 5H), 6.89 (d,  $J = 7.3$  Hz, 2H), 6.76 (d,  $J = 8.6$  Hz, 2H), 6.38 (d,  $J = 7.7$  Hz, 1H), 5.16 (d,  $J = 8.3$  Hz, 1H), 5.02 (d,  $J = 9.0$  Hz, 1H), 4.87 (d,  $J = 12.0$  Hz, 1H), 4.51 (d,  $J = 12.0$  Hz, 1H), 4.38 (t,  $J = 8.7$  Hz, 1H), 3.75 (s, 3H), 2.85 (s, 3H);  $^{13}\text{C}$  NMR (151 MHz,  $\text{CDCl}_3$ )  $\delta$  196.4, 176.0, 171.6, 159.6, 153.0, 142.6, 136.7, 136.4, 135.6, 133.7, 132.8, 132.3, 130.6, 130.1, 130.1, 129.9, 129.6, 128.6, 128.5, 128.1, 128.0, 127.9, 127.6, 127.3, 126.7, 126.4, 124.8, 123.4, 121.1, 119.6, 116.7, 113.9, 108.1, 68.9, 67.1, 66.2, 58.3, 55.2, 49.3, 26.2; HRMS (ESI)  $m/z$  Calcd. for  $\text{C}_{46}\text{H}_{37}\text{BrN}_2\text{NaO}_6^+$  ( $[\text{M}+\text{Na}]^+$ ) 815.1727, Found 815.1726; Enantiomeric excess was determined to be 77% (determined by HPLC using chiral IF column, hexane/2-propanol = 70/30,  $\lambda = 254$  nm, 30 °C, 0.8 mL/min,  $t_{\text{major}} = 33.2$  min,  $t_{\text{minor}} = 30.5$  min).

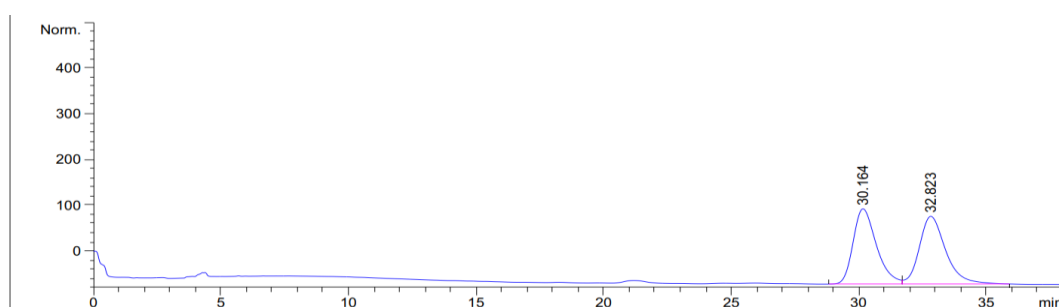

| Peak # | RetTime [min] | Type | Width [min] | Area mAU *s | Height [mAU] | Area %  |
|--------|---------------|------|-------------|-------------|--------------|---------|
| 1      | 30.164        | BV   | 0.9601      | 1.04207e4   | 164.22964    | 49.5924 |
| 2      | 32.823        | VB   | 1.0712      | 1.05920e4   | 147.66824    | 50.4076 |

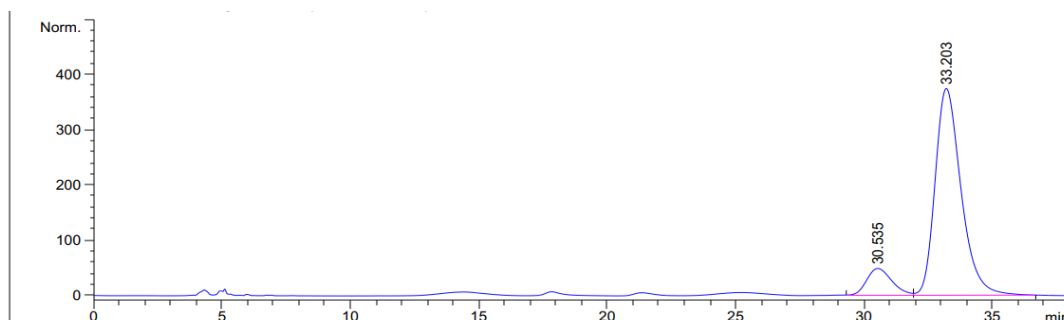

| Peak # | RetTime [min] | Type | Width [min] | Area mAU *s | Height [mAU] | Area %  |
|--------|---------------|------|-------------|-------------|--------------|---------|
| 1      | 30.535        | BV   | 1.0309      | 3348.36426  | 48.78033     | 11.2902 |
| 2      | 33.203        | VB   | 1.0573      | 2.63090e4   | 374.34518    | 88.7098 |

### KR-Compound (-)-5ka

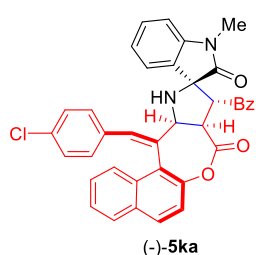

Prepared according to the procedure within 120 h as white solid (25.7 mg, 42% yield);  $[\alpha]_D^{18} = -106.32$  ( $c$  0.57,  $\text{CH}_2\text{Cl}_2$ ); Enantiomeric excess was determined to be 90% (determined by HPLC using chiral AD-H column, hexane/2-propanol = 70/30,  $\lambda$

= 254 nm, 30 °C, 0.8 mL/min,  $t_{\text{major}} = 29.4$  min,  $t_{\text{minor}} = 25.8$  min).

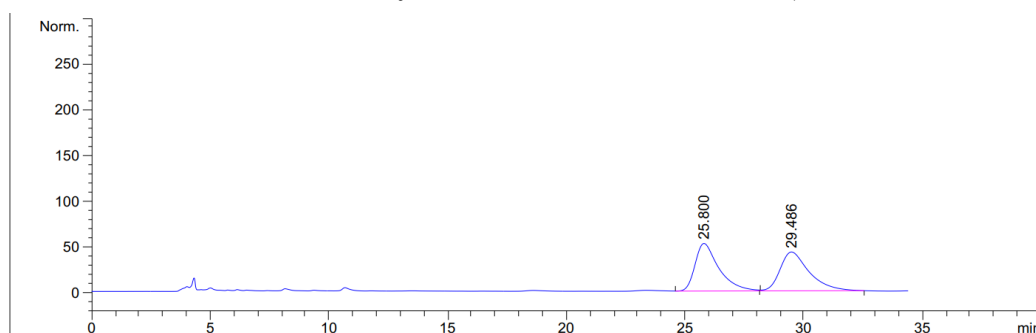

| Peak # | RetTime [min] | Type | Width [min] | Area mAU *s | Height [mAU] | Area %  |
|--------|---------------|------|-------------|-------------|--------------|---------|
| 1      | 25.800        | VB   | 1.0196      | 3629.78955  | 51.90930     | 50.0087 |
| 2      | 29.486        | BB   | 1.2561      | 3628.52197  | 42.46320     | 49.9913 |

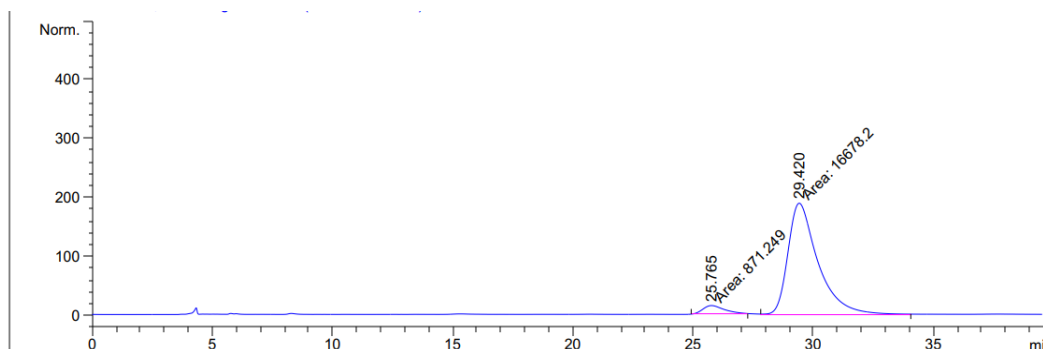

| Peak # | RetTime [min] | Type | Width [min] | Area mAU *s | Height [mAU] | Area %  |
|--------|---------------|------|-------------|-------------|--------------|---------|
| 1      | 25.765        | MM   | 1.0331      | 871.24921   | 14.05536     | 4.9645  |
| 2      | 29.420        | MM   | 1.4678      | 1.66782e4   | 189.37865    | 95.0355 |

### KR-Compound 11h

Prepared according to the procedure within 120 h as white solid (33.7 mg, 45% yield, dr > 20:1); mp 132.1-132.9 °C;  $[\alpha]_D^{18} = 22.80$  (c 0.25, CH<sub>2</sub>Cl<sub>2</sub>); <sup>1</sup>H NMR (600 MHz, CDCl<sub>3</sub>) δ 7.79-7.75 (m, 2H), 7.66-7.63 (m, 1H), 7.40-7.36 (m, 2H), 7.31-7.26 (m, 4H), 7.22-7.18 (m, 3H), 7.15 (d, *J* = 8.6 Hz, 2H), 7.10-7.06 (m, 1H), 7.01 (d, *J* = 7.2 Hz, 1H), 6.96 (d, *J* = 8.6 Hz, 2H), 6.91-6.88 (m, 1H), 6.82-6.79 (m, 2H), 6.75-6.72 (m, 2H), 6.35 (d, *J* = 7.8 Hz, 1H), 5.17 (d, *J* = 8.4 Hz, 1H), 4.97 (t, *J* = 11.2 Hz, 2H), 4.64 (d, *J* = 12.0 Hz, 1H), 4.41 (t, *J* = 8.6 Hz, 1H), 3.73 (s, 3H), 2.83 (s, 3H); <sup>13</sup>C NMR (151 MHz, CDCl<sub>3</sub>) δ 196.4, 176.3, 172.1, 159.7, 151.5, 142.6, 136.7, 134.5, 134.3, 134.1, 133.4, 132.8, 132.2, 130.4, 130.2, 129.7, 129.5, 129.3, 128.8, 128.5, 128.3, 128.0, 127.8, 127.2, 126.8, 124.8, 124.1, 123.3, 123.2, 119.0, 117.5, 113.9, 108.1, 69.1, 67.4, 66.3, 58.6, 55.2, 50.0, 26.2; HRMS (ESI) *m/z* Calcd. for C<sub>46</sub>H<sub>37</sub>ClN<sub>2</sub>NaO<sub>6</sub><sup>+</sup> ([M+Na]<sup>+</sup>) 771.2232, Found 771.2231; Enantiomeric excess was determined to be 91%

(determined by HPLC using chiral OD-H column, hexane/2-propanol = 70/30,  $\lambda = 254$  nm, 30 °C, 0.8 mL/min,  $t_{\text{major}} = 12.6$  min,  $t_{\text{minor}} = 15.2$  min).

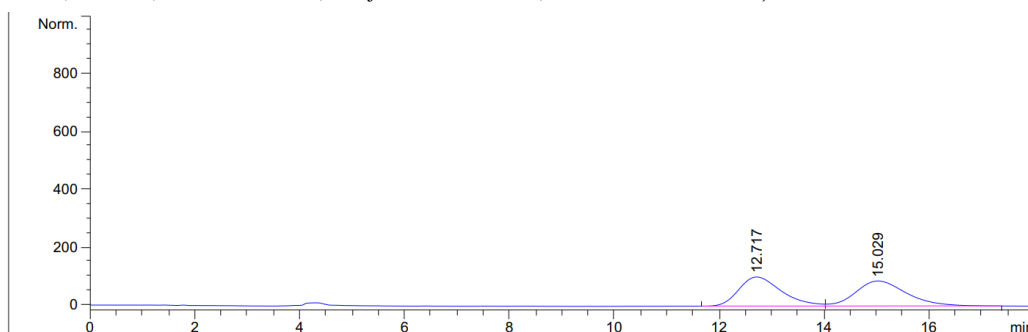

| Peak # | RetTime [min] | Type | Width [min] | Area mAU *s | Height [mAU] | Area %  |
|--------|---------------|------|-------------|-------------|--------------|---------|
| 1      | 12.717        | PV   | 0.8690      | 5701.83447  | 100.66525    | 49.2876 |
| 2      | 15.029        | VB   | 1.0246      | 5866.66113  | 86.77345     | 50.7124 |

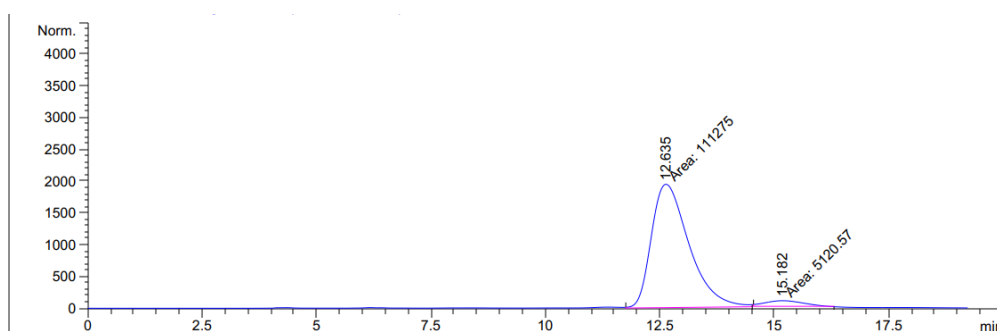

| Peak # | RetTime [min] | Type | Width [min] | Area mAU *s | Height [mAU] | Area %  |
|--------|---------------|------|-------------|-------------|--------------|---------|
| 1      | 12.635        | MM   | 0.9554      | 1.11275e5   | 1941.23645   | 95.6007 |
| 2      | 15.182        | MM   | 0.9647      | 5120.57080  | 88.46569     | 4.3993  |

### KR-Compound (-)-51a

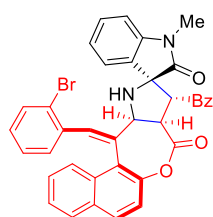

(-)-51a

Prepared according to the procedure within 120 h as white solid (30.1 mg, 46% yield);  $[\alpha]_D^{18} = -173.51$  ( $c$  0.42,  $\text{CH}_2\text{Cl}_2$ ); Enantiomeric excess was determined to be 71% (determined by HPLC using chiral AD-H+IF column, hexane/2-propanol = 70/30,  $\lambda = 254$  nm, 30 °C, 0.8 mL/min,  $t_{\text{major}} = 66.9$  min,  $t_{\text{minor}} = 60.3$  min).

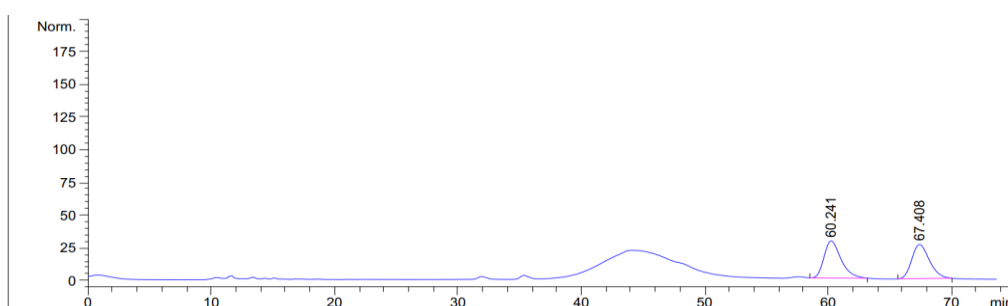



| Peak # | RetTime [min] | Type | Width [min] | Area mAU *s | Height [mAU] | Area %  |
|--------|---------------|------|-------------|-------------|--------------|---------|
| 1      | 60.241        | VB   | 1.3474      | 2750.09155  | 28.45477     | 51.3647 |
| 2      | 67.408        | BB   | 1.3979      | 2603.95459  | 26.04449     | 48.6353 |

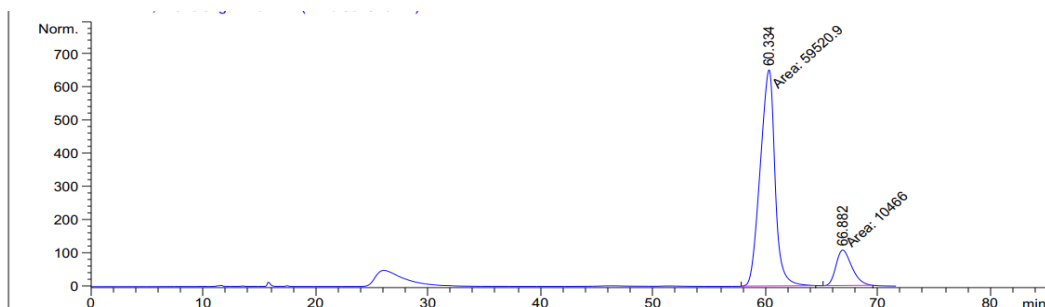

| Peak # | RetTime [min] | Type | Width [min] | Area mAU *s | Height [mAU] | Area %  |
|--------|---------------|------|-------------|-------------|--------------|---------|
| 1      | 60.334        | MM   | 1.5235      | 5.95209e4   | 651.15576    | 85.0457 |
| 2      | 66.882        | MM   | 1.6304      | 1.04660e4   | 106.98863    | 14.9543 |

### KR-Compound 11i

Prepared according to the procedure within 120 h as white solid (33.3 mg, 42% yield, dr > 20:1); mp 136.4-137.2 °C;  $[\alpha]_D^{18} = 80.29$  (c 0.49, CH<sub>2</sub>Cl<sub>2</sub>); <sup>1</sup>H NMR (600 MHz, CDCl<sub>3</sub>) δ 7.74-7.65 (m, 4H), 7.45 (d, *J* = 7.9 Hz, 1H), 7.42-7.38 (m, 1H), 7.36-7.28 (m, 3H), 7.26-7.21 (m, 3H), 7.17-7.11 (m, 3H), 7.04 (d, *J* = 8.2 Hz, 2H), 6.98-6.93 (m, 1H), 6.90-6.83 (m, 1H), 6.73-6.64 (m, 4H), 6.39 (d, *J* = 7.6 Hz, 1H), 5.24 (d, *J* = 9.2 Hz, 1H), 5.11 (d, *J* = 9.5 Hz, 1H), 4.84 (d, *J* = 12.0 Hz, 1H), 4.50 (dd, *J* = 16.0, 6.9 Hz, 2H), 3.72 (s, 3H), 2.78 (s, 3H); <sup>13</sup>C NMR (151 MHz, CDCl<sub>3</sub>) δ 196.4, 175.9, 171.6, 159.5, 152.3, 142.5, 136.8, 136.5, 136.5, 136.2, 132.8, 132.5, 132.1, 130.2, 130.0, 129.6, 129.5, 129.0, 129.0, 128.7, 128.3, 128.1, 127.9, 127.3, 126.7, 126.6, 124.9, 124.4, 123.9, 123.2, 123.0, 118.9, 116.6, 113.7, 108.1, 69.1, 67.2, 65.5, 58.3, 55.2, 49.6, 26.1; HRMS (ESI) *m/z* Calcd. for C<sub>46</sub>H<sub>37</sub>BrN<sub>2</sub>NaO<sub>6</sub><sup>+</sup> ([M+Na]<sup>+</sup>) 815.1727, Found 815.1725; Enantiomeric excess was determined to be 94% (determined by HPLC using chiral AD-H column, hexane/2-propanol = 70/30, λ = 254 nm, 30 °C, 0.8 mL/min, *t*<sub>major</sub> = 38.0 min, *t*<sub>minor</sub> = 29.5 min).

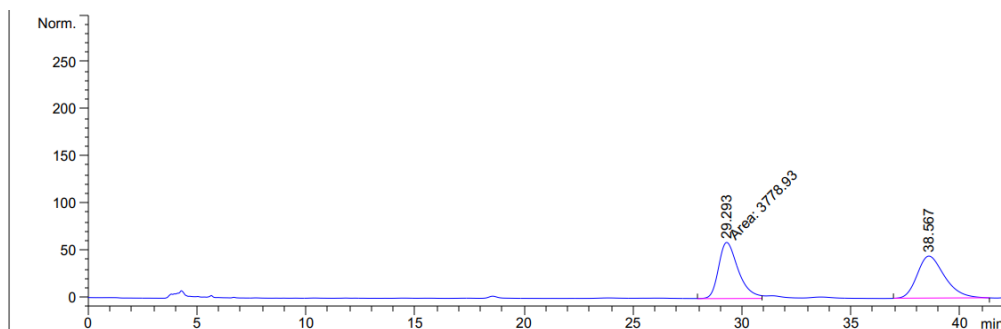

| Peak # | RetTime [min] | Type | Width [min] | Area mAU *s | Height [mAU] | Area %  |
|--------|---------------|------|-------------|-------------|--------------|---------|
| 1      | 29.293        | MM   | 1.0550      | 3778.92896  | 59.69654     | 49.0589 |
| 2      | 38.567        | BB   | 1.2875      | 3923.91089  | 44.70668     | 50.9411 |

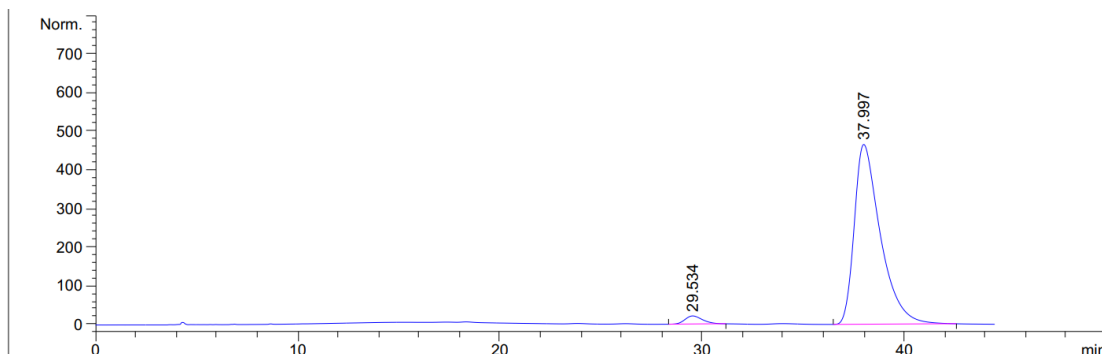

| Peak # | RetTime [min] | Type | Width [min] | Area mAU *s | Height [mAU] | Area %  |
|--------|---------------|------|-------------|-------------|--------------|---------|
| 1      | 29.534        | BB   | 0.8975      | 1276.19482  | 21.02283     | 2.9651  |
| 2      | 37.997        | BB   | 1.3160      | 4.17645e4   | 464.88159    | 97.0349 |

### KR-Compound (-)-5na

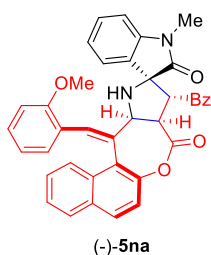

Prepared according to the procedure within 120 h as white solid (31.5 mg, 52% yield);  $[\alpha]_D^{18} = -141.36$  ( $c$  0.46,  $\text{CH}_2\text{Cl}_2$ ); Enantiomeric excess was determined to be 63% (determined by HPLC using chiral AD-H column, hexane/2-propanol = 70/30,  $\lambda = 254$  nm, 30 °C, 0.8 mL/min,  $t_{\text{major}} = 11.7$  min,  $t_{\text{minor}} = 12.9$  min).

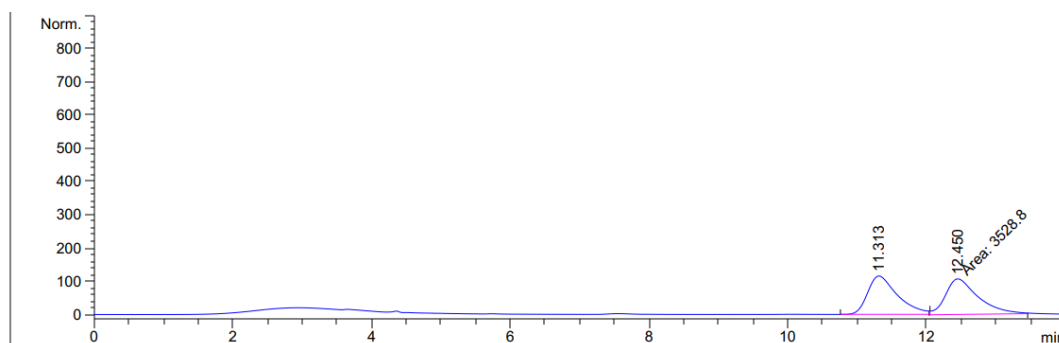

| Peak # | RetTime [min] | Type | Width [min] | Area mAU *s | Height [mAU] | Area %  |
|--------|---------------|------|-------------|-------------|--------------|---------|
| 1      | 11.313        | MM   | 0.5068      | 3520.32349  | 115.76198    | 49.1294 |
| 2      | 12.450        | MM   | 0.5690      | 3645.08228  | 106.77081    | 50.8706 |

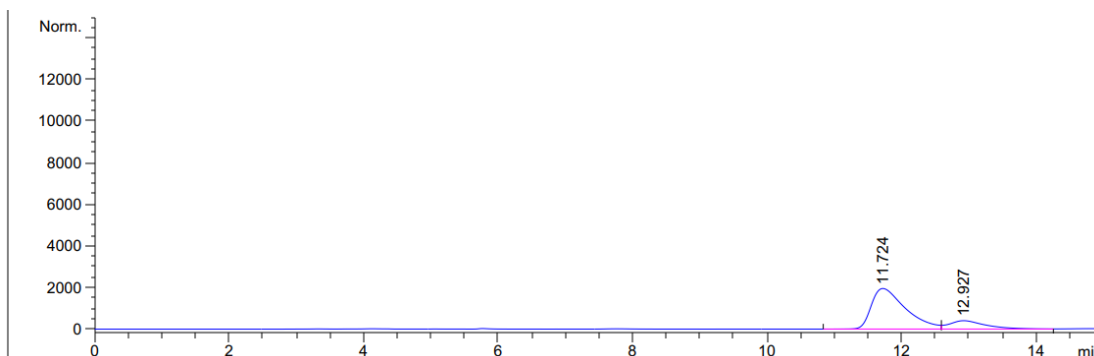

| Peak # | RetTime [min] | Type | Width [min] | Area mAU *s | Height [mAU] | Area %  |
|--------|---------------|------|-------------|-------------|--------------|---------|
| 1      | 11.724        | VV   | 0.5249      | 6.87545e4   | 1949.87549   | 81.8525 |
| 2      | 12.927        | VV   | 0.5437      | 1.52435e4   | 403.89236    | 18.1475 |

### KR-Compound 11j

Prepared according to the procedure within 120 h as white solid (28.3 mg, 38% yield, dr > 20:1); mp 120.5-121.4 °C;  $[\alpha]_D^{18} = 62.45$  (c 0.23, CH<sub>2</sub>Cl<sub>2</sub>); <sup>1</sup>H NMR (400 MHz, CDCl<sub>3</sub>) δ 7.79-7.70 (m, 2H), 7.69 (d, *J* = 9.0 Hz, 1H), 7.61 (s, 1H), 7.41-7.34 (m, 1H), 7.32-7.26 (m, 3H), 7.25-7.05 (m, 9H), 7.04-6.98 (m, 1H), 6.95-6.88 (m, 1H), 6.76 (d, *J* = 8.6 Hz, 3H), 6.62-6.56 (m, 1H), 6.42-6.34 (m, 2H), 5.17 (d, *J* = 7.9 Hz, 1H), 5.04 (d, *J* = 9.2 Hz, 1H), 4.90 (d, *J* = 12.1 Hz, 1H), 4.61 (d, *J* = 12.1 Hz, 1H), 4.47-4.39 (m, 1H), 3.84 (s, 3H), 3.75 (s, 3H), 2.81 (s, 3H); <sup>13</sup>C NMR (101 MHz, CDCl<sub>3</sub>) δ 196.4, 175.6, 171.9, 159.5, 156.9, 151.9, 142.6, 136.8, 133.2, 132.7, 132.6, 131.4, 130.0, 129.9, 129.4, 129.1, 129.0, 128.7, 128.6, 128.3, 128.0, 127.9, 127.4, 126.4, 125.1, 125.0, 124.6, 123.1, 122.9, 120.1, 118.9, 117.6, 113.8, 110.1, 108.1, 69.3, 67.1, 66.9, 59.0, 55.5, 55.2, 49.5, 26.1; HRMS (ESI) *m/z*. Calcd. for C<sub>47</sub>H<sub>40</sub>N<sub>2</sub>NaO<sub>7</sub><sup>+</sup> ([M+Na]<sup>+</sup>) 767.2728, Found 767.2729; Enantiomeric excess was determined to be 94% (determined by HPLC using chiral AD-H column, hexane/2-propanol = 70/30, λ = 254 nm, 30 °C, 0.8 mL/min, *t*<sub>major</sub> = 15.6 min, *t*<sub>minor</sub> = 24.3 min).

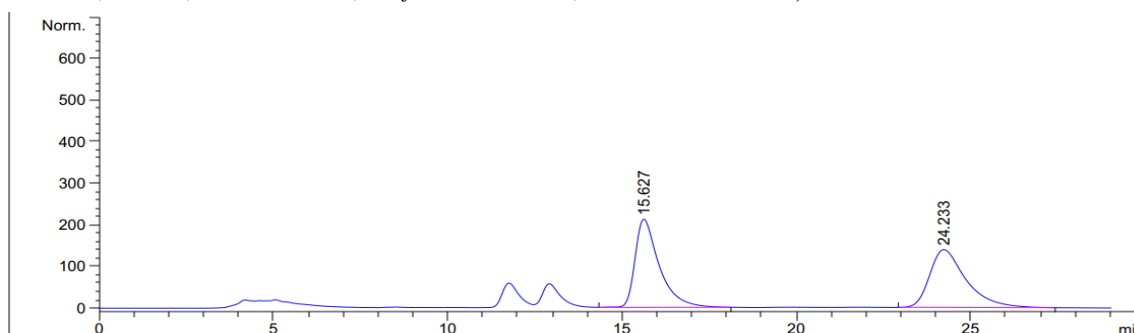

| Peak # | RetTime [min] | Type | Width [min] | Area mAU *s | Height [mAU] | Area %  |
|--------|---------------|------|-------------|-------------|--------------|---------|
| 1      | 15.627        | BB   | 0.7128      | 1.02136e4   | 211.72586    | 50.3536 |
| 2      | 24.233        | BB   | 1.0673      | 1.00702e4   | 138.87512    | 49.6464 |

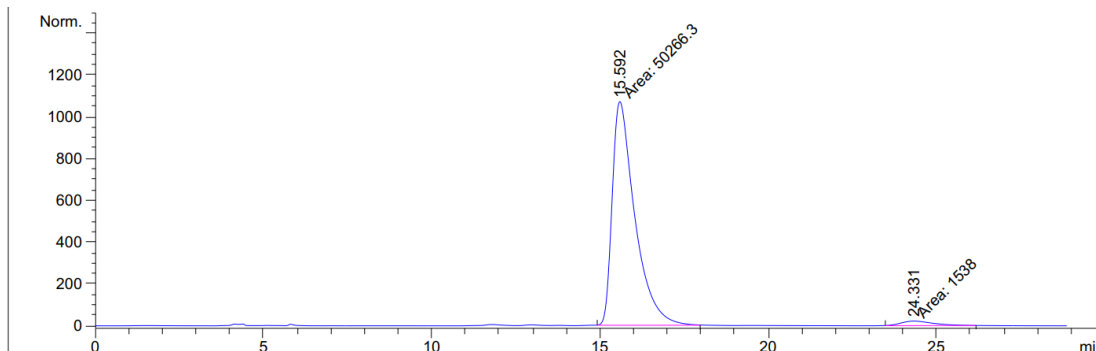

| Peak # | RetTime [min] | Type | Width [min] | Area mAU *s | Height [mAU] | Area %  |
|--------|---------------|------|-------------|-------------|--------------|---------|
| 1      | 15.592        | MM   | 0.7827      | 5.02663e4   | 1070.40088   | 97.0311 |
| 2      | 24.331        | MM   | 1.1504      | 1538.00488  | 22.28256     | 2.9689  |

### KR-Compound (-)-5ac

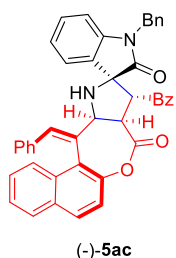

Prepared according to the procedure within 120 h as white solid (28.7 mg, 44% yield);  $[\alpha]_D^{18} = -78.48$  (*c* 0.45, CH<sub>2</sub>Cl<sub>2</sub>); Enantiomeric excess was determined to be 74% (determined by HPLC using chiral OD-H column, hexane/2-propanol = 80/20,  $\lambda = 254$  nm, 30 °C, 0.8 mL/min,  $t_{\text{major}} = 12.8$  min,  $t_{\text{minor}} = 20.8$  min).

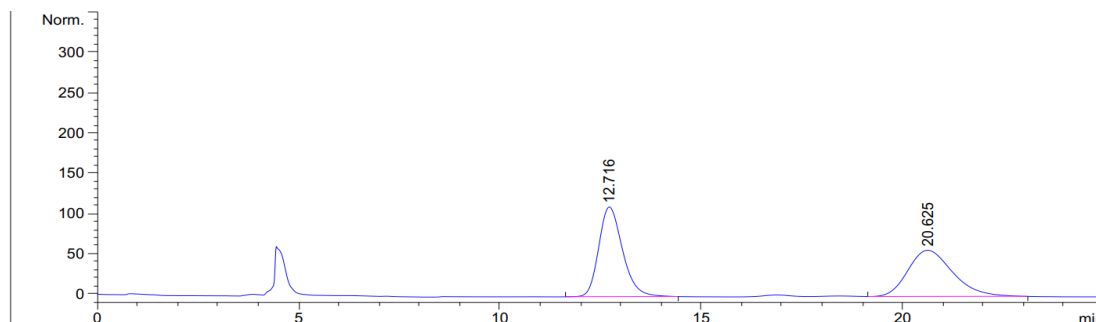

| Peak # | RetTime [min] | Type | Width [min] | Area mAU *s | Height [mAU] | Area %  |
|--------|---------------|------|-------------|-------------|--------------|---------|
| 1      | 12.716        | BB   | 0.6275      | 4581.56982  | 111.25667    | 50.7030 |
| 2      | 20.625        | VB   | 1.1759      | 4454.53125  | 57.42118     | 49.2970 |

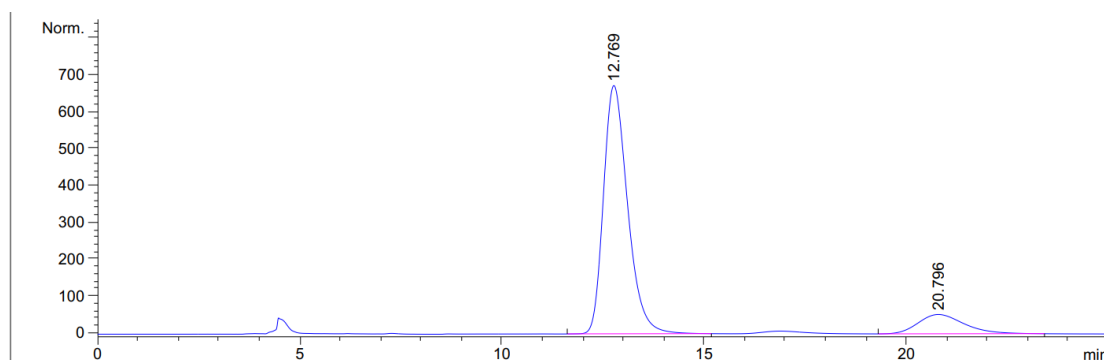

| Peak # | RetTime [min] | Type | Width [min] | Area mAU *s | Height [mAU] | Area %  |
|--------|---------------|------|-------------|-------------|--------------|---------|
| 1      | 12.769        | BB   | 0.6384      | 2.79395e4   | 673.33539    | 87.0216 |
| 2      | 20.796        | BB   | 1.2128      | 4166.87744  | 52.41623     | 12.9784 |

### KR-Compound 11k

Prepared according to the procedure within 120 h as light yellow solid (33.2 mg, 42% yield, dr > 20:1); mp 129.0-130.0 °C;  $[\alpha]_D^{18} = 48.71$  (*c* 0.43, CH<sub>2</sub>Cl<sub>2</sub>); <sup>1</sup>H NMR (400 MHz, CDCl<sub>3</sub>) δ 7.92 (s, 1H), 7.80-7.68 (m, 3H), 7.50-7.40 (m, 4H), 7.31-7.26 (m, 2H), 7.24-7.17 (m, 6H), 7.13-7.06 (m, 3H), 7.06-6.96 (m, 6H), 6.96-6.85 (m, 3H), 6.73 (d, *J* = 8.5 Hz, 2H), 6.33 (d, *J* = 7.8 Hz, 1H), 5.28 (d, *J* = 8.6 Hz, 1H), 5.03 (d, *J* = 8.7 Hz, 1H), 4.89 (d, *J* = 12.0 Hz, 1H), 4.81 (d, *J* = 15.6 Hz, 1H), 4.60 (d, *J* = 12.0 Hz, 1H), 4.46 (t, *J* = 8.8 Hz, 1H), 4.31 (d, *J* = 15.6 Hz, 1H), 3.75 (s, 3H), 3.14 (s, 1H); <sup>13</sup>C NMR (101 MHz, CDCl<sub>3</sub>) δ 196.2, 176.3, 171.9, 159.6, 151.6, 141.9, 136.6, 135.8, 135.7, 135.0, 133.3, 133.1, 132.3, 130.2, 130.2, 129.4, 129.3, 128.8, 128.8, 128.6, 128.4, 128.3, 128.1, 127.8, 127.7, 127.3, 127.2, 126.7, 125.2, 124.4, 123.2, 123.2, 119.0, 117.7, 113.8, 109.3, 69.2, 67.2, 66.3, 57.6, 55.2, 50.4, 44.3; HRMS (ESI) *m/z* Calcd. for C<sub>52</sub>H<sub>43</sub>N<sub>2</sub>O<sub>6</sub><sup>+</sup> ([M+H]<sup>+</sup>) 791.3116, Found 791.3116; Enantiomeric excess was determined to be 93% (determined by HPLC using chiral IA column, hexane/2-propanol = 70/30, λ = 254 nm, 30 °C, 0.8 mL/min, *t*<sub>major</sub> = 21.0 min, *t*<sub>minor</sub> = 39.0 min).

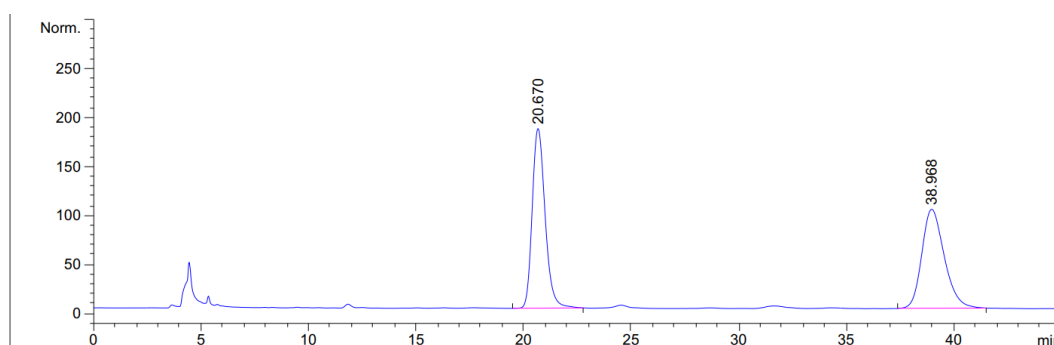

| Peak # | RetTime [min] | Type | Width [min] | Area mAU *s | Height [mAU] | Area %  |
|--------|---------------|------|-------------|-------------|--------------|---------|
| 1      | 20.670        | BB   | 0.6430      | 7658.65430  | 183.38397    | 51.0088 |
| 2      | 38.968        | BB   | 1.0719      | 7355.71875  | 101.23952    | 48.9912 |

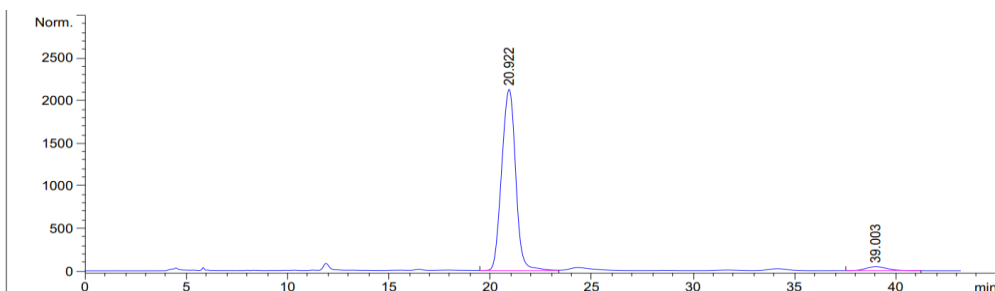

| Peak # | RetTime [min] | Type | Width [min] | Area mAU *s | Height [mAU] | Area %  |
|--------|---------------|------|-------------|-------------|--------------|---------|
| 1      | 20.922        | VV   | 0.7590      | 1.02128e5   | 2124.00830   | 96.7468 |
| 2      | 39.003        | BB   | 1.0744      | 3434.16846  | 46.64688     | 3.2532  |

### KR-Compound (-)-3ab

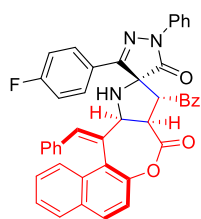

Prepared according to the procedure within 168 h as white solid (34.2 mg, 50% yield);  $[\alpha]_D^{18} = -10.53$  ( $c$  0.49,  $\text{CH}_2\text{Cl}_2$ ); Enantiomeric excess was determined to be 50% (determined by HPLC using chiral AD-H column, hexane/2-propanol = 70/30,  $\lambda = 254$  nm, 30 °C, 0.8 mL/min,  $t_{\text{major}} = 10.2$  min,  $t_{\text{minor}} = 6.6$  min).

(-)-3ab

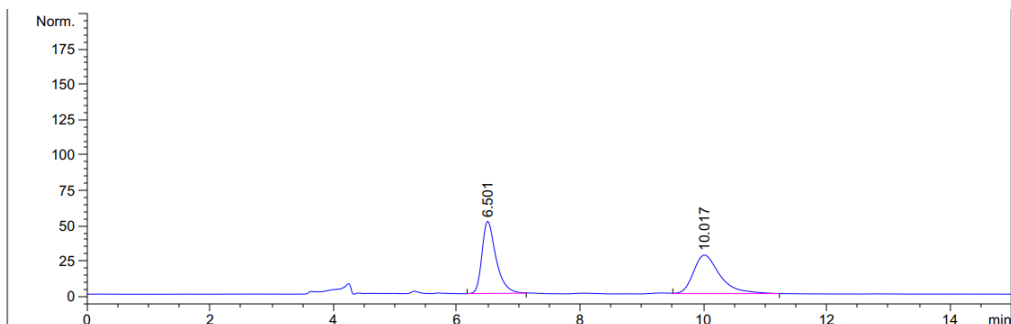

| Peak # | RetTime [min] | Type | Width [min] | Area mAU *s | Height [mAU] | Area %  |
|--------|---------------|------|-------------|-------------|--------------|---------|
| 1      | 6.501         | BB   | 0.2379      | 809.97375   | 50.93932     | 49.4591 |
| 2      | 10.017        | VB   | 0.4520      | 827.69098   | 27.35371     | 50.5409 |

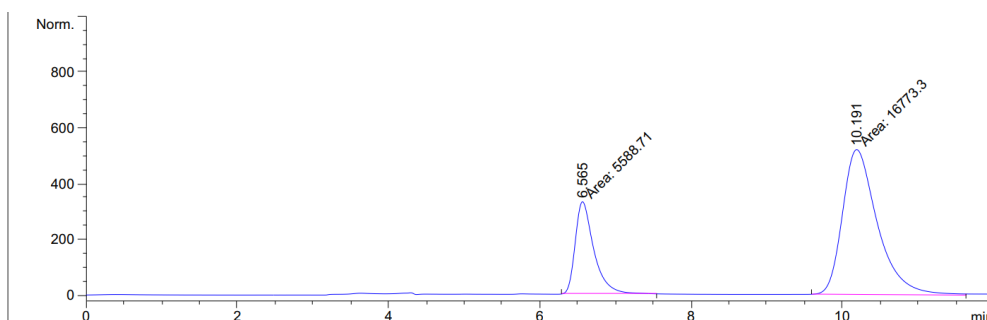

| Peak # | RetTime [min] | Type | Width [min] | Area mAU *s | Height [mAU] | Area %  |
|--------|---------------|------|-------------|-------------|--------------|---------|
| 1      | 6.565         | MM   | 0.2827      | 5588.71338  | 329.49185    | 24.9920 |
| 2      | 10.191        | MM   | 0.5376      | 1.67733e4   | 520.01520    | 75.0080 |

### KR-Compound 12a

Prepared according to the procedure within 168 h as white solid (26.3 mg, 32% yield, dr > 20:1); mp 125.6-126.6 °C;  $[\alpha]_D^{18} = -27.44$  (*c* 0.27, CH<sub>2</sub>Cl<sub>2</sub>); <sup>1</sup>H NMR (600 MHz, CDCl<sub>3</sub>) δ 8.44-8.39 (m, 2H), 7.78-7.73 (m, 2H), 7.62 (dd, *J* = 8.7, 1.0 Hz, 2H), 7.58 (d, *J* = 8.1 Hz, 1H), 7.42-7.37 (m, 2H), 7.35-7.29 (m, 4H), 7.29-7.25 (m, 2H), 7.21-7.17 (m, 3H), 7.16-7.05 (m, 8H), 6.98-6.95 (m, 2H), 6.73-6.70 (m, 2H), 5.40 (d, *J* = 9.5 Hz, 1H), 5.20-5.03 (m, 2H), 4.88 (d, *J* = 11.8 Hz, 1H), 4.48 (dd, *J* = 9.4, 7.5 Hz, 1H), 3.76 (s, 3H), 2.92 (s, 1H); <sup>13</sup>C NMR (151 MHz, CDCl<sub>3</sub>) δ 195.6, 173.4, 173.3, 164.3 (d, *J* = 252.2 Hz), 160.0, 154.1, 151.2, 137.3, 136.5, 136.1, 135.4, 133.4, 131.7, 130.7, 130.2, 129.5, 129.4, 129.3, 128.7, 128.6, 128.5, 128.4, 128.3, 128.1, 128.0, 126.9, 126.4, 125.4, 123.4, 123.3, 119.0, 118.8, 118.6, 116.0 (d, *J* = 21.1 Hz), 114.0, 71.5, 68.2, 63.1, 56.6, 55.2, 48.6; <sup>19</sup>F NMR (377 MHz, CDCl<sub>3</sub>) δ -108.26; HRMS (ESI) *m/z* Calcd. for C<sub>52</sub>H<sub>41</sub>FN<sub>3</sub>O<sub>6</sub><sup>+</sup> ([M+H]<sup>+</sup>) 822.2974, Found 822.2982; Enantiomeric excess was determined to be 95% (determined by HPLC using chiral AD-H column, hexane/2-propanol = 70/30, λ = 254 nm, 30 °C, 0.8 mL/min, *t*<sub>major</sub> = 18.9 min, *t*<sub>minor</sub> = 16.4 min).

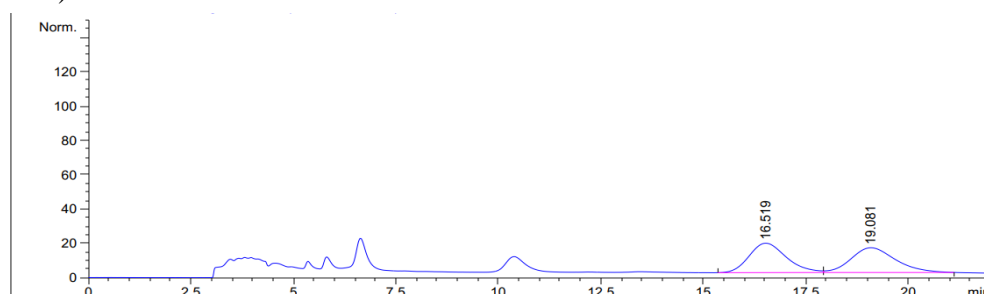

| Peak # | RetTime [min] | Type | Width [min] | Area mAU *s | Height [mAU] | Area %  |
|--------|---------------|------|-------------|-------------|--------------|---------|
| 1      | 16.519        | BV   | 0.9067      | 1091.21765  | 17.18755     | 49.7444 |
| 2      | 19.081        | VB   | 1.0181      | 1102.43079  | 14.49978     | 50.2556 |

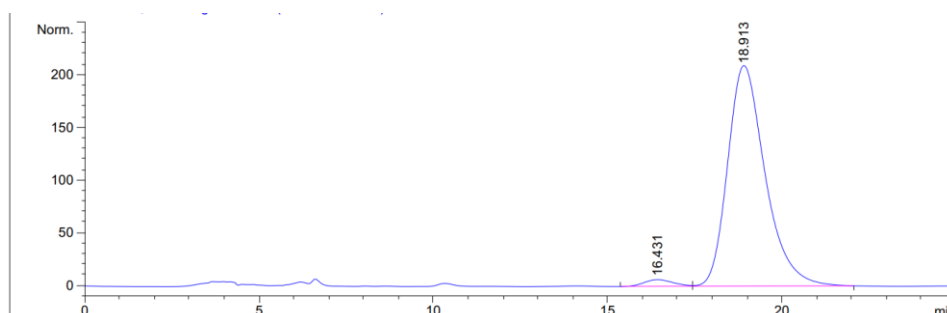

| Peak # | RetTime [min] | Type | Width [min] | Area mAU *s | Height [mAU] | Area %  |
|--------|---------------|------|-------------|-------------|--------------|---------|
| 1      | 16.431        | PV   | 0.7854      | 381.01056   | 6.46258      | 2.3674  |
| 2      | 18.913        | VB   | 1.1511      | 1.57133e4   | 209.63759    | 97.6326 |

### KR-Compound (-)-3ah

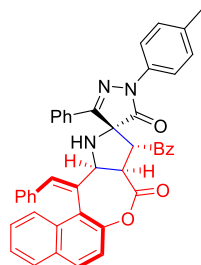

(-)-3ah

Prepared according to the procedure within 168 h as white solid (31.9 mg, 47% yield);  $[\alpha]_D^{18} = -7.97$  (*c* 0.83, CH<sub>2</sub>Cl<sub>2</sub>); Enantiomeric excess was determined to be 69% (determined by HPLC using chiral AD-H column, hexane/2-propanol = 80/20,  $\lambda = 254$  nm, 30 °C, 0.8 mL/min,  $t_{\text{major}} = 22.0$  min,  $t_{\text{minor}} = 25.8$  min).

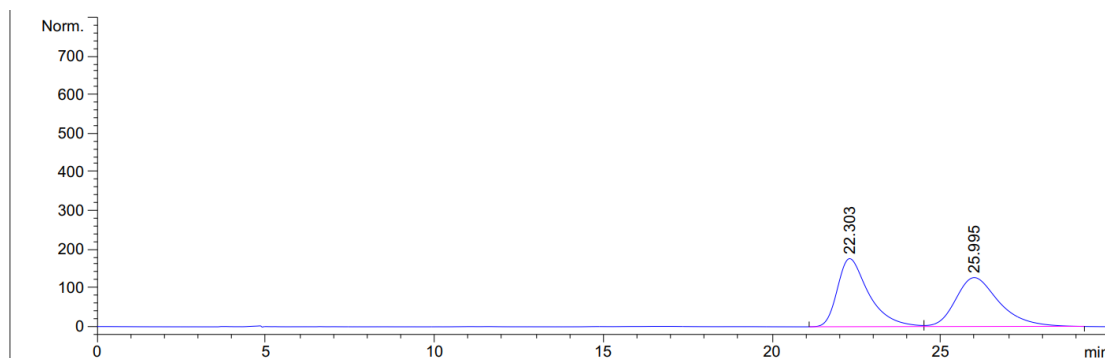

| Peak # | RetTime [min] | Type | Width [min] | Area mAU *s | Height [mAU] | Area %  |
|--------|---------------|------|-------------|-------------|--------------|---------|
| 1      | 22.303        | BB   | 0.9610      | 1.14201e4   | 176.30986    | 50.0598 |
| 2      | 25.995        | BB   | 1.3348      | 1.13928e4   | 126.83072    | 49.9402 |

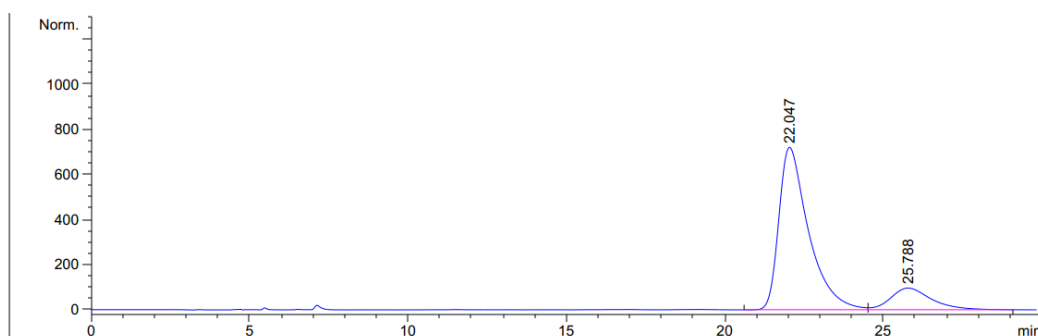

| Peak # | RetTime [min] | Type | Width [min] | Area mAU *s | Height [mAU] | Area %  |
|--------|---------------|------|-------------|-------------|--------------|---------|
| 1      | 22.047        | VV   | 0.9648      | 4.70223e4   | 720.89783    | 84.5365 |
| 2      | 25.788        | VB   | 1.3093      | 8601.33594  | 96.36187     | 15.4635 |



## KR-Compound 12b

Prepared according to the procedure within 168 h as white solid (31.9 mg, 39% yield, dr > 20:1); mp 137.3-138.0 °C;  $[\alpha]_D^{18} = -44.03$  (*c* 0.56, CH<sub>2</sub>Cl<sub>2</sub>); <sup>1</sup>H NMR (600 MHz, CDCl<sub>3</sub>) δ 8.46-8.40 (m, 2H), 7.77 (d, *J* = 8.8 Hz, 2H), 7.64 (d, *J* = 8.3 Hz, 1H), 7.60-7.53 (m, 3H), 7.52-7.49 (m, 2H), 7.42-7.38 (m, 2H), 7.37-7.34 (m, 2H), 7.31-7.26 (m, 2H), 7.21 (d, *J* = 9.0 Hz, 1H), 7.15-7.04 (m, 9H), 7.01-6.97 (m, 2H), 6.72-6.67 (m, 2H), 5.39 (d, *J* = 9.5 Hz, 1H), 5.20 (d, *J* = 7.8 Hz, 1H), 5.10 (d, *J* = 11.8 Hz, 1H), 4.92 (d, *J* = 11.8 Hz, 1H), 4.56 (dd, *J* = 9.5, 7.8 Hz, 1H), 3.75 (s, 3H), 2.93 (s, 1H), 2.32 (s, 3H); <sup>13</sup>C NMR (101 MHz, CDCl<sub>3</sub>) δ 195.7, 173.4, 173.3, 159.8, 154.9, 151.3, 136.6, 136.1, 135.6, 135.1, 134.9, 133.8, 133.4, 131.8, 130.8, 130.6, 130.3, 130.1, 129.3, 129.2, 128.9, 128.5, 128.4, 128.3, 128.1, 128.0, 127.3, 126.9, 126.5, 123.6, 123.3, 119.1, 118.8, 118.8, 113.9, 71.7, 68.0, 63.1, 56.3, 55.2, 48.5, 21.0; HRMS (ESI) *m/z* Calcd. for C<sub>53</sub>H<sub>44</sub>N<sub>3</sub>O<sub>6</sub><sup>+</sup> ([M+H]<sup>+</sup>) 818.3225, Found 818.3220; Enantiomeric excess was determined to be 95% (determined by HPLC using chiral IF column, hexane/2-propanol = 70/30, λ = 254 nm, 30 °C, 0.8 mL/min, *t*<sub>major</sub> = 41.5 min, *t*<sub>minor</sub> = 28.3 min).

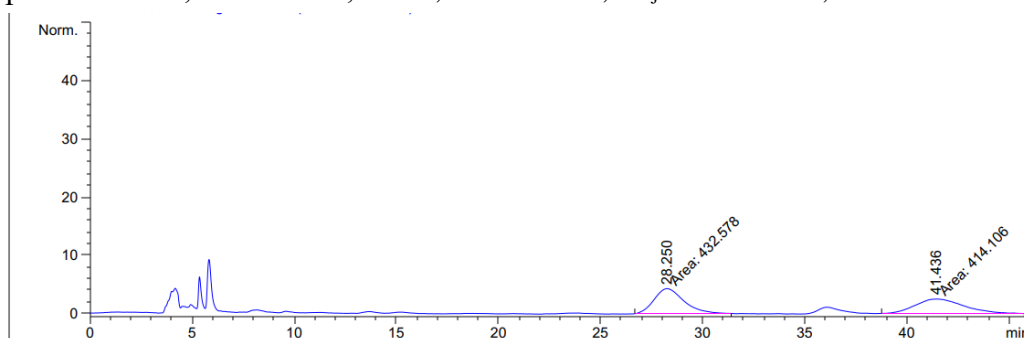

| Peak # | RetTime [min] | Type | Width [min] | Area mAU  | Area *s | Height [mAU] | Area %  |
|--------|---------------|------|-------------|-----------|---------|--------------|---------|
| 1      | 28.250        | MM   | 1.7000      | 439.84677 |         | 4.31213      | 50.9023 |
| 2      | 41.436        | MM   | 2.8093      | 424.25244 |         | 2.51692      | 49.0977 |

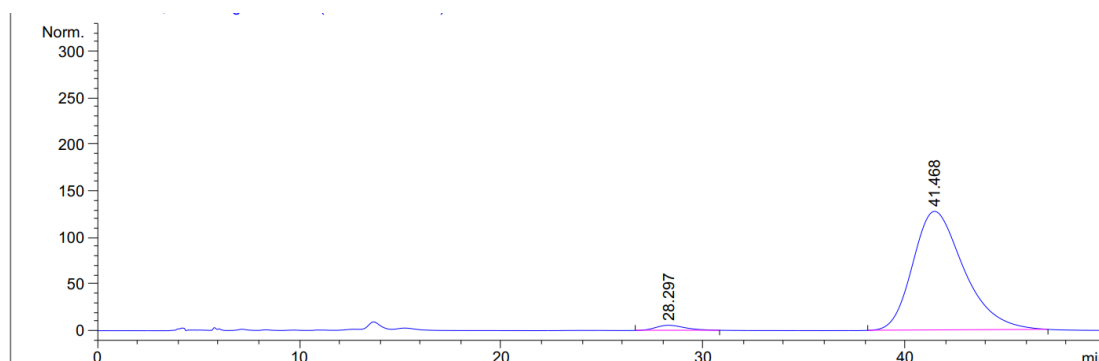

| Peak # | RetTime [min] | Type | Width [min] | Area mAU  | Area *s | Height [mAU] | Area %  |
|--------|---------------|------|-------------|-----------|---------|--------------|---------|
| 1      | 28.297        | BB   | 1.1908      | 560.89246 |         | 5.54289      | 2.4337  |
| 2      | 41.468        | BB   | 2.4611      | 2.24861e4 |         | 127.57444    | 97.5663 |

### KR-Compound (-)-3ca

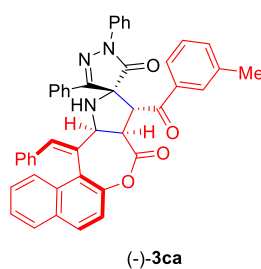

Prepared according to the procedure within 168 h as white solid (31.9 mg, 47% yield);  $[\alpha]_D^{18} = -14.36$  ( $c$  0.37,  $\text{CH}_2\text{Cl}_2$ ); Enantiomeric excess was determined to be 55% (determined by HPLC using chiral AD-H column, hexane/2-propanol = 70/30,  $\lambda = 254$  nm, 30 °C, 0.8 mL/min,  $t_{\text{major}} = 10.7$  min,  $t_{\text{minor}} = 9.3$  min).

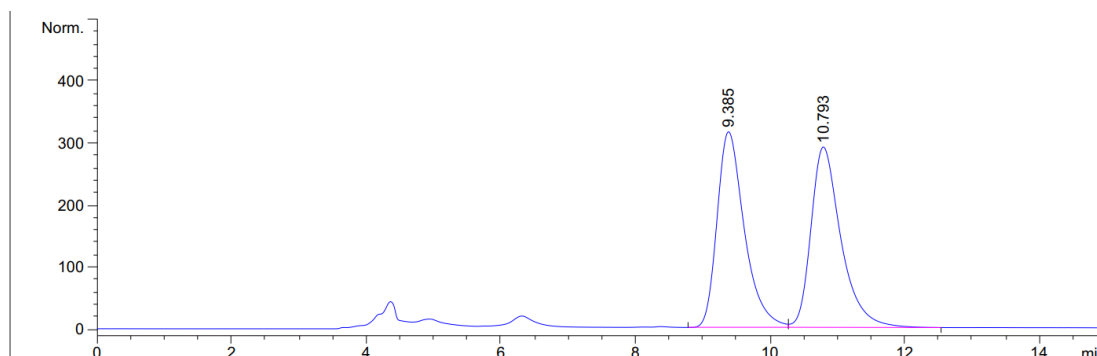

| Peak # | RetTime [min] | Type | Width [min] | Area mAU *s | Height [mAU] | Area %  |
|--------|---------------|------|-------------|-------------|--------------|---------|
| 1      | 9.385         | VV   | 0.4270      | 8910.99512  | 315.57254    | 49.6116 |
| 2      | 10.793        | VB   | 0.4675      | 9050.53809  | 291.12088    | 50.3884 |

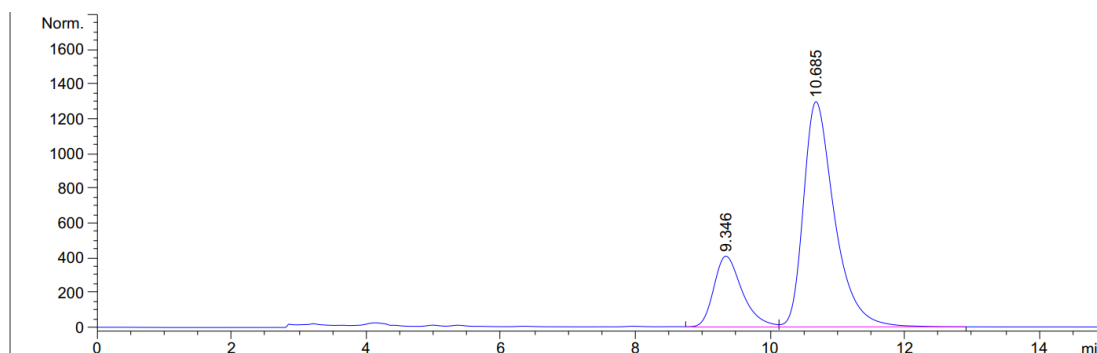

| Peak # | RetTime [min] | Type | Width [min] | Area mAU *s | Height [mAU] | Area %  |
|--------|---------------|------|-------------|-------------|--------------|---------|
| 1      | 9.346         | VV   | 0.4460      | 1.19897e4   | 408.24005    | 22.3559 |
| 2      | 10.685        | VB   | 0.4839      | 4.16416e4   | 1296.66760   | 77.6441 |

### KR-Compound 12c

Prepared according to the procedure within 168 h as white solid (27.8 mg, 34% yield, dr > 20:1); mp 129.9-130.8 °C;  $[\alpha]_D^{18} = -28.80$  ( $c$  0.28,  $\text{CH}_2\text{Cl}_2$ );  $^1\text{H}$  NMR (400 MHz,  $\text{CDCl}_3$ )  $\delta$  8.47-8.41 (m, 2H), 7.76 (d,  $J = 9.0$  Hz, 2H), 7.65-7.51 (m, 7H), 7.40 (s, 1H), 7.34-7.26 (m, 4H), 7.21-7.17 (m, 2H), 7.16-7.11 (m, 3H), 7.09-7.02 (m, 5H), 7.00-

6.96 (m, 2H), 6.72-6.66 (m, 2H), 5.36 (d,  $J = 9.5$  Hz, 1H), 5.20 (d,  $J = 7.7$  Hz, 1H), 5.11 (d,  $J = 11.8$  Hz, 1H), 4.92 (d,  $J = 11.8$  Hz, 1H), 4.62-4.55 (m, 1H), 3.74 (s, 3H), 2.06 (s, 3H);  $^{13}\text{C}$  NMR (151 MHz,  $\text{CDCl}_3$ )  $\delta$  195.8, 173.4, 159.8, 155.1, 151.3, 138.2, 137.4, 136.2, 136.0, 135.6, 134.1, 133.8, 131.8, 130.9, 130.5, 130.3, 130.1, 129.3, 128.8, 128.7, 128.7, 128.5, 128.3, 128.1, 128.0, 127.3, 126.9, 126.5, 125.3, 125.2, 123.5, 123.2, 118.9, 118.8, 113.9, 71.7, 68.0, 63.1, 56.4, 55.2, 48.3, 21.0; HRMS (ESI)  $m/z$  Calcd. for  $\text{C}_{53}\text{H}_{44}\text{N}_3\text{O}_6^+$  ( $[\text{M}+\text{H}]^+$ ) 818.3225, Found 818.3219; Enantiomeric excess was determined to be 97% (determined by HPLC using chiral IA column, hexane/2-propanol = 70/30,  $\lambda = 254$  nm, 30 °C, 0.8 mL/min,  $t_{\text{major}} = 19.9$  min,  $t_{\text{minor}} = 16.1$  min).

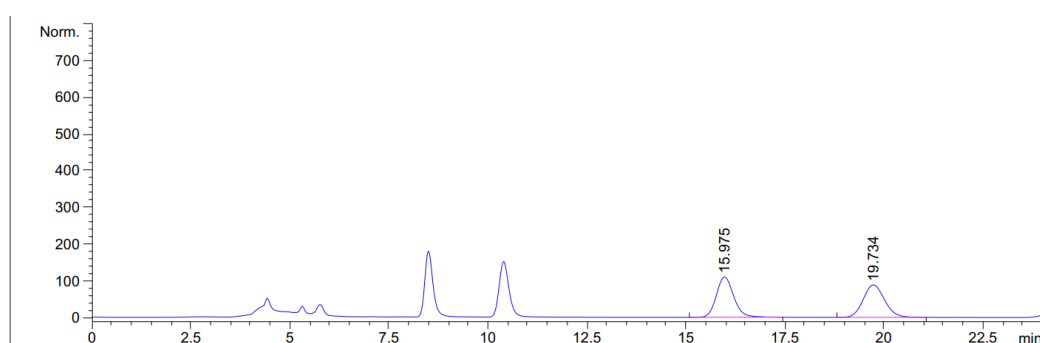

| Peak # | RetTime [min] | Type | Width [min] | Area mAU * s | Height [mAU] | Area %  |
|--------|---------------|------|-------------|--------------|--------------|---------|
| 1      | 15.975        | BB   | 0.4725      | 3363.46851   | 109.77303    | 50.3180 |
| 2      | 19.734        | BB   | 0.5885      | 3320.94946   | 88.34985     | 49.6820 |

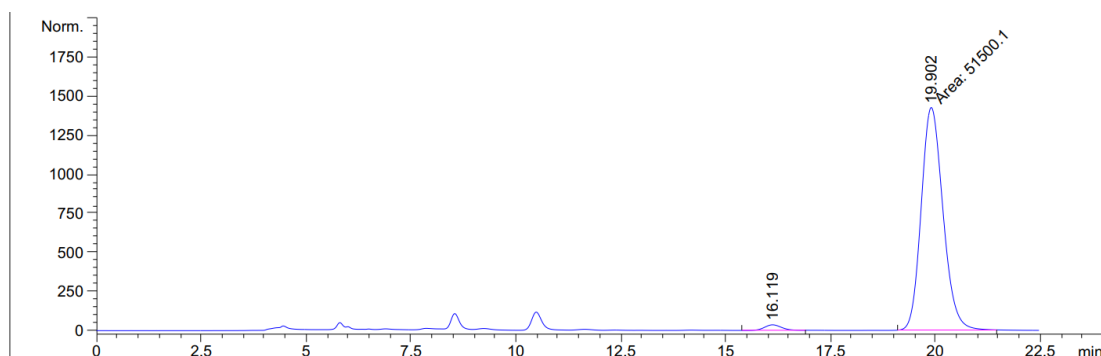

| Peak # | RetTime [min] | Type | Width [min] | Area mAU * s | Height [mAU] | Area %  |
|--------|---------------|------|-------------|--------------|--------------|---------|
| 1      | 16.119        | PB   | 0.4364      | 980.31342    | 35.26645     | 1.8680  |
| 2      | 19.902        | MM   | 0.6032      | 5.15001e4    | 1422.96973   | 98.1320 |

### KR-Compound (-)-3ia

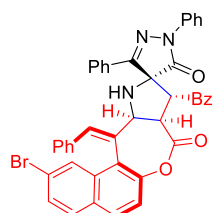

(-)-3ia

Prepared according to the procedure within 168 h as white solid (34.3 mg, 46% yield);  $[\alpha]_D^{18} = -10.04$  ( $c$  0.44,  $\text{CH}_2\text{Cl}_2$ ); Enantiomeric excess was determined to be 81% (determined by

HPLC using chiral AD-H column, hexane/2-propanol = 70/30,  $\lambda = 254$  nm, 30 °C, 0.8 mL/min,  $t_{\text{major}} = 17.8$  min,  $t_{\text{minor}} = 7.9$  min).

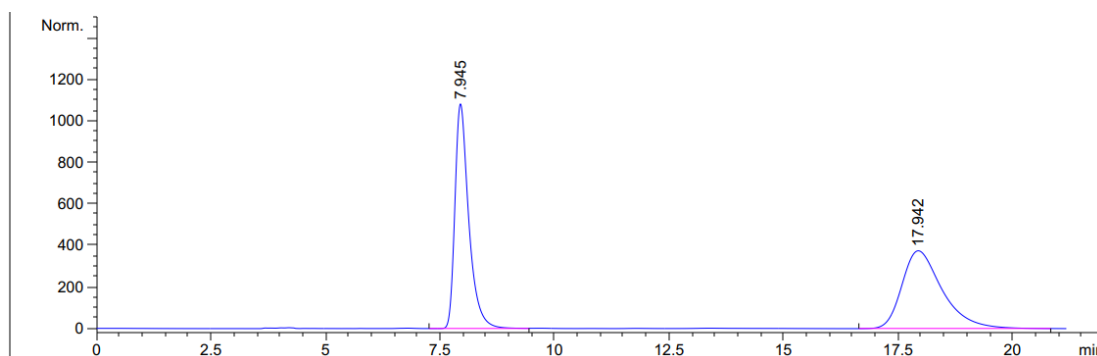

| Peak # | RetTime [min] | Type | Width [min] | Area mAU *s | Height [mAU] | Area %  |
|--------|---------------|------|-------------|-------------|--------------|---------|
| 1      | 7.945         | VB   | 0.3156      | 2.28032e4   | 1082.72888   | 49.8342 |
| 2      | 17.942        | BB   | 0.9193      | 2.29550e4   | 375.06909    | 50.1658 |

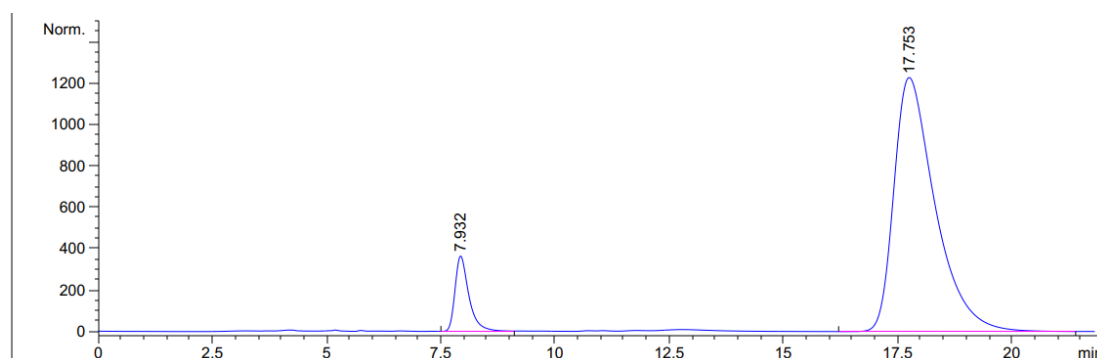

| Peak # | RetTime [min] | Type | Width [min] | Area mAU *s | Height [mAU] | Area %  |
|--------|---------------|------|-------------|-------------|--------------|---------|
| 1      | 7.932         | VV   | 0.3188      | 7716.84326  | 363.82080    | 9.1300  |
| 2      | 17.753        | VB   | 0.9280      | 7.68052e4   | 1227.46497   | 90.8700 |

### KR-Compound 12d

Prepared according to the procedure within 168 h as white solid (34.4 mg, 39% yield, dr > 20:1); mp 133.9-134.8 °C;  $[\alpha]_D^{18} = -47.60$  ( $c$  0.46,  $\text{CH}_2\text{Cl}_2$ );  $^1\text{H}$  NMR (600 MHz,  $\text{CDCl}_3$ )  $\delta$  8.43-8.38 (m, 2H), 7.90 (d,  $J = 2.0$  Hz, 1H), 7.67 (d,  $J = 9.0$  Hz, 1H), 7.64-7.62 (m, 2H), 7.61-7.57 (m, 1H), 7.56-7.48 (m, 3H), 7.41-7.29 (m, 7H), 7.22 (d,  $J = 9.0$  Hz, 1H), 7.16-7.06 (m, 6H), 7.04 (d,  $J = 8.6$  Hz, 2H), 6.94 (d,  $J = 7.2$  Hz, 2H), 6.71-6.65 (m, 2H), 5.35 (d,  $J = 9.4$  Hz, 1H), 5.19 (d,  $J = 7.5$  Hz, 1H), 5.07 (d,  $J = 11.8$  Hz, 1H), 4.89 (d,  $J = 11.8$  Hz, 1H), 4.54 (dd,  $J = 9.4, 7.5$  Hz, 1H), 3.74 (s, 3H);  $^{13}\text{C}$  NMR (151 MHz,  $\text{CDCl}_3$ )  $\delta$  195.6, 173.5, 173.4, 159.9, 155.1, 151.8, 137.3, 136.5, 136.4, 135.3, 133.5, 133.1, 131.0, 130.6, 130.4, 130.4, 130.3, 130.2, 130.1, 129.2,

128.9, 128.7, 128.5, 128.4, 128.3, 128.2, 128.1, 127.3, 126.4, 125.5, 125.5, 120.1, 119.0, 117.0, 114.0, 71.6, 68.1, 63.1, 56.3, 55.2, 48.4; HRMS (ESI)  $m/z$  Calcd. for  $C_{52}H_{41}BrN_3O_6^+$  ( $[M+H]^+$ ) 882.2173, Found 882.2178; Enantiomeric excess was determined to be 94% (determined by HPLC using chiral IF column, hexane/2-propanol = 70/30,  $\lambda = 254$  nm, 30 °C, 0.8 mL/min,  $t_{major} = 38.3$  min,  $t_{minor} = 32.2$  min).

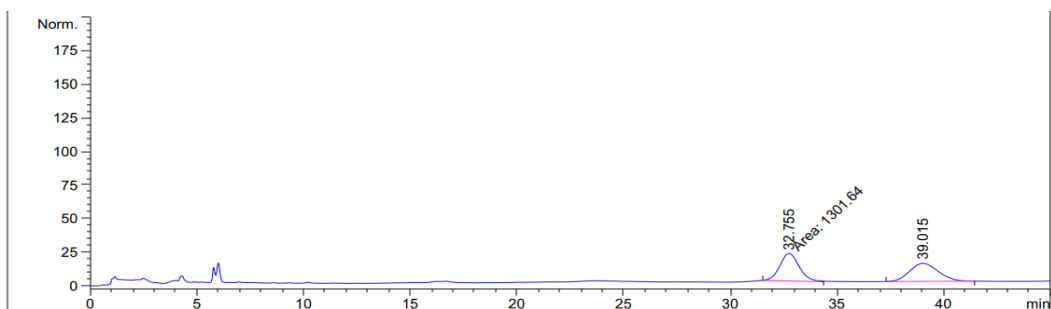

| Peak # | RetTime [min] | Type | Width [min] | Area mAU *s | Height [mAU] | Area %  |
|--------|---------------|------|-------------|-------------|--------------|---------|
| 1      | 32.755        | MM   | 1.0575      | 1301.64429  | 20.51410     | 50.7685 |
| 2      | 39.015        | BB   | 1.1060      | 1262.23718  | 13.43867     | 49.2315 |

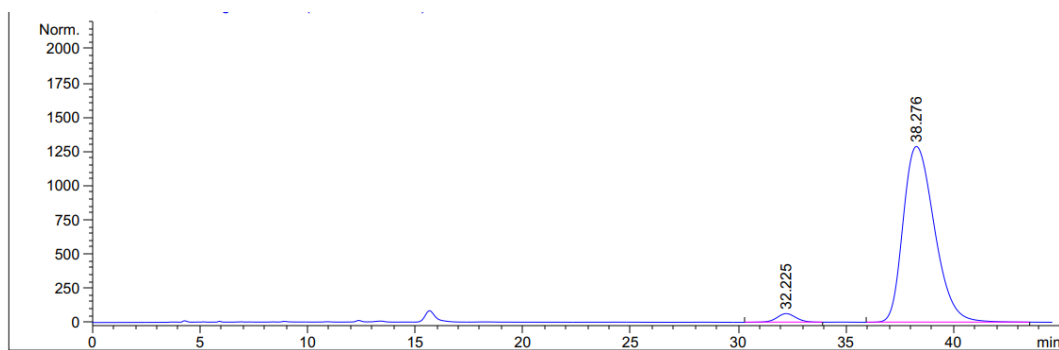

| Peak # | RetTime [min] | Type | Width [min] | Area mAU *s | Height [mAU] | Area %  |
|--------|---------------|------|-------------|-------------|--------------|---------|
| 1      | 32.225        | BB   | 0.9348      | 3938.87451  | 63.11533     | 2.9448  |
| 2      | 38.276        | VB   | 1.5813      | 1.29818e5   | 1284.16846   | 97.0552 |

## 6. References

- [1] The synthesis of 3-amino oxindole hydrochlorides, see: W. Chen, Z. Wu, J. Hu, L. Cun, X. Zhang, W. Yuan. *Org. Lett.* **2011**, *13*, 2472.
- [2] The synthesis of 4-Amino pyrazolone hydrochlorides, see: X. Bao, S. Wei, X. Qian, J. Qu, B. Wang, L. Zou and G. Ge. *Org. Lett.* **2018**, *20*, 3394-3398.
- [3] You-Dong Shao, Jin-Shuo Feng, Dan-Dan Han, Kang-Hui Pan, Ling Zhang, Yi-Fan Wang, Zhong-Hui Ma, Pei-Ru Wang, Mingjing Yin and Dao-Juan Cheng. *Org. Chem. Front.* **2022**, *9*, 764-770.

## 7. NMR spectra for compounds

1a

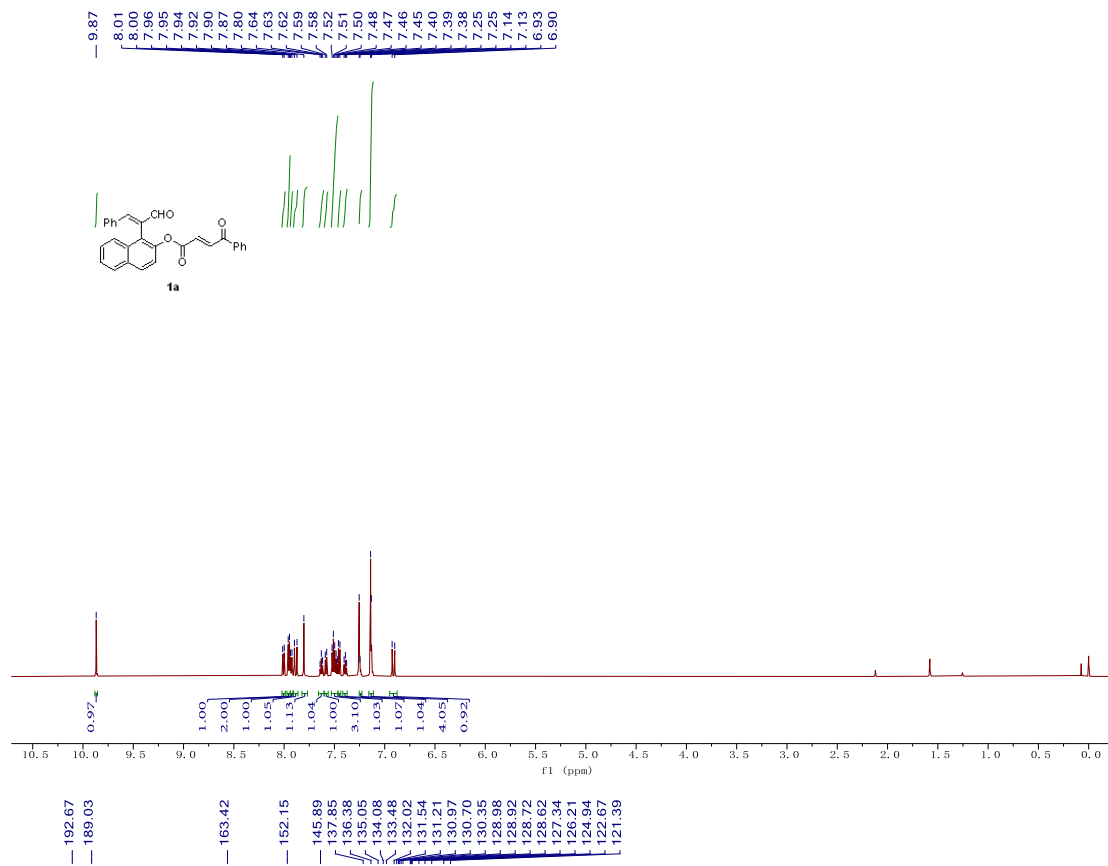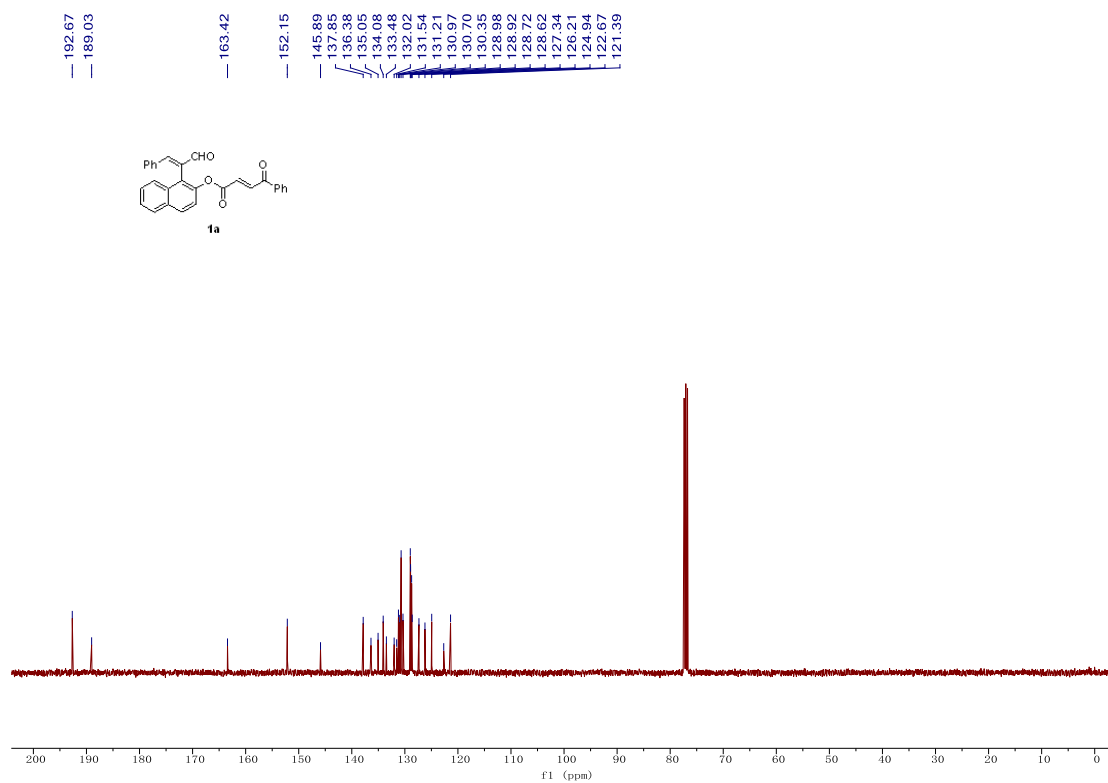

**1b**

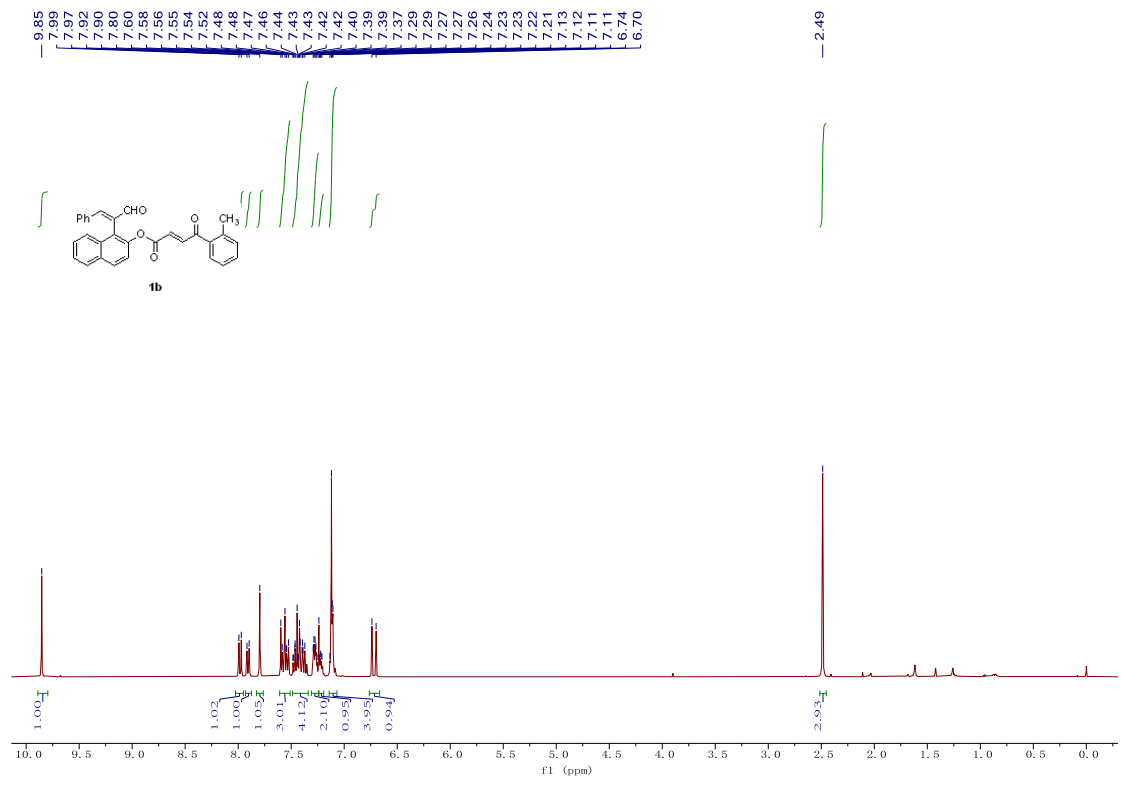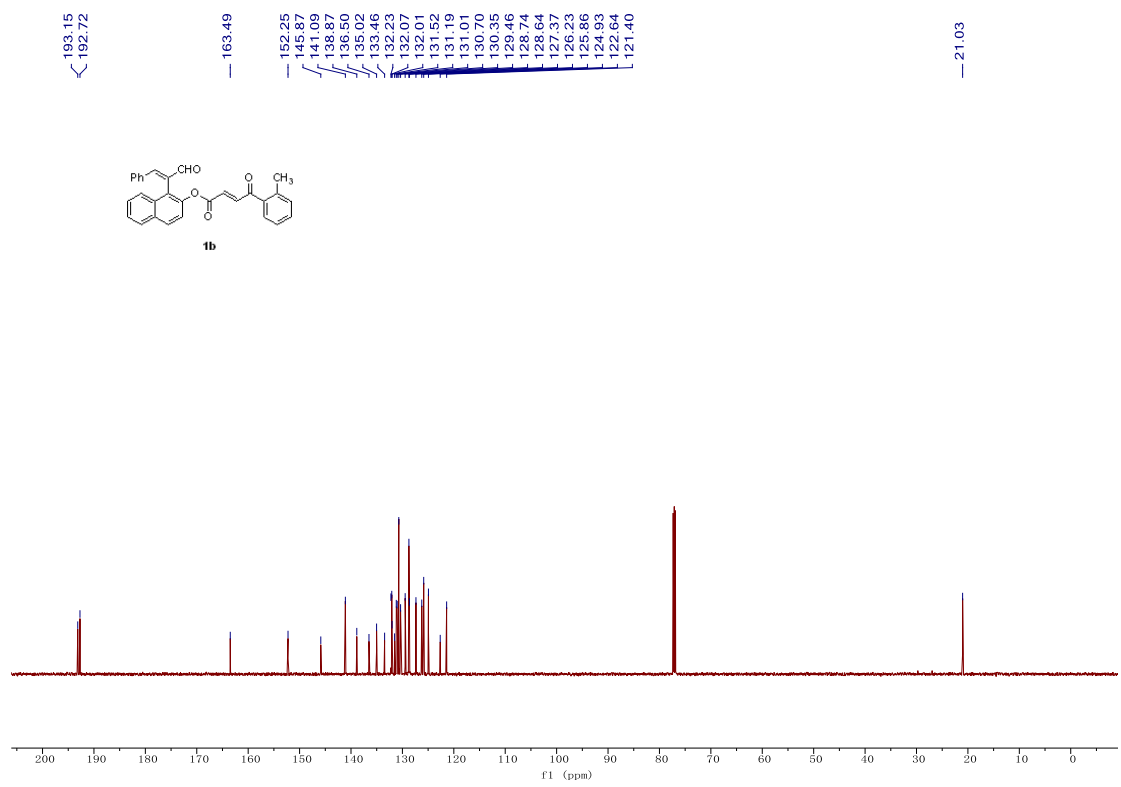



1c

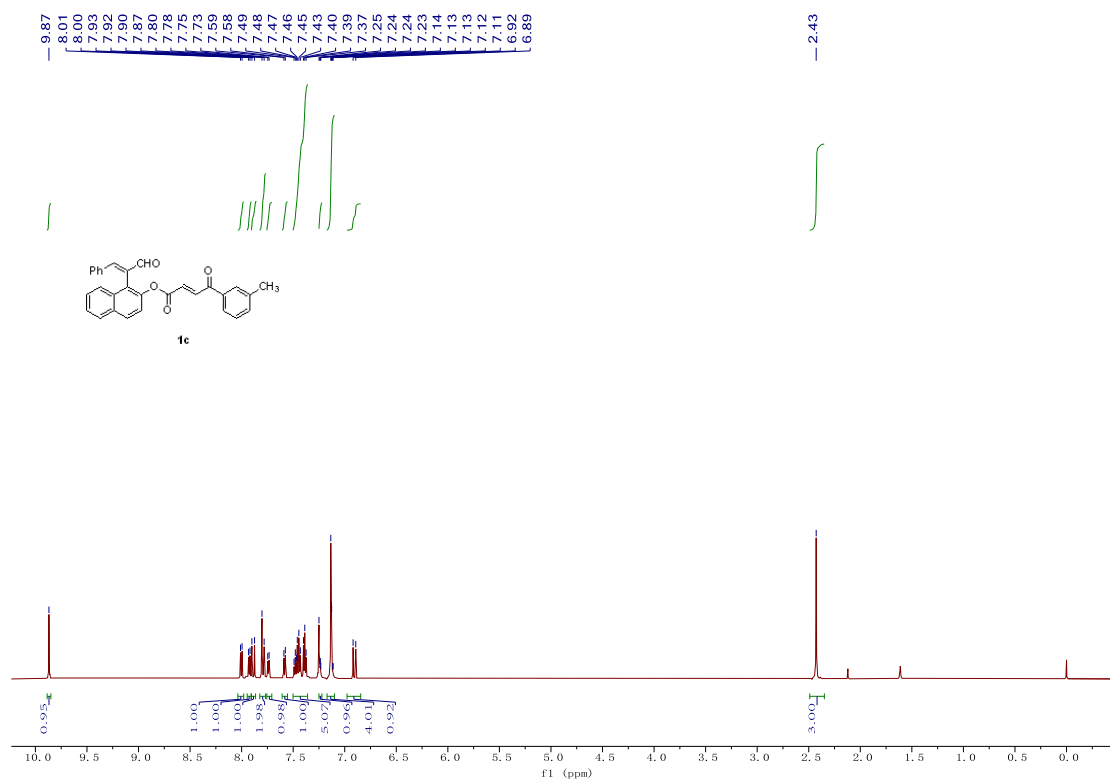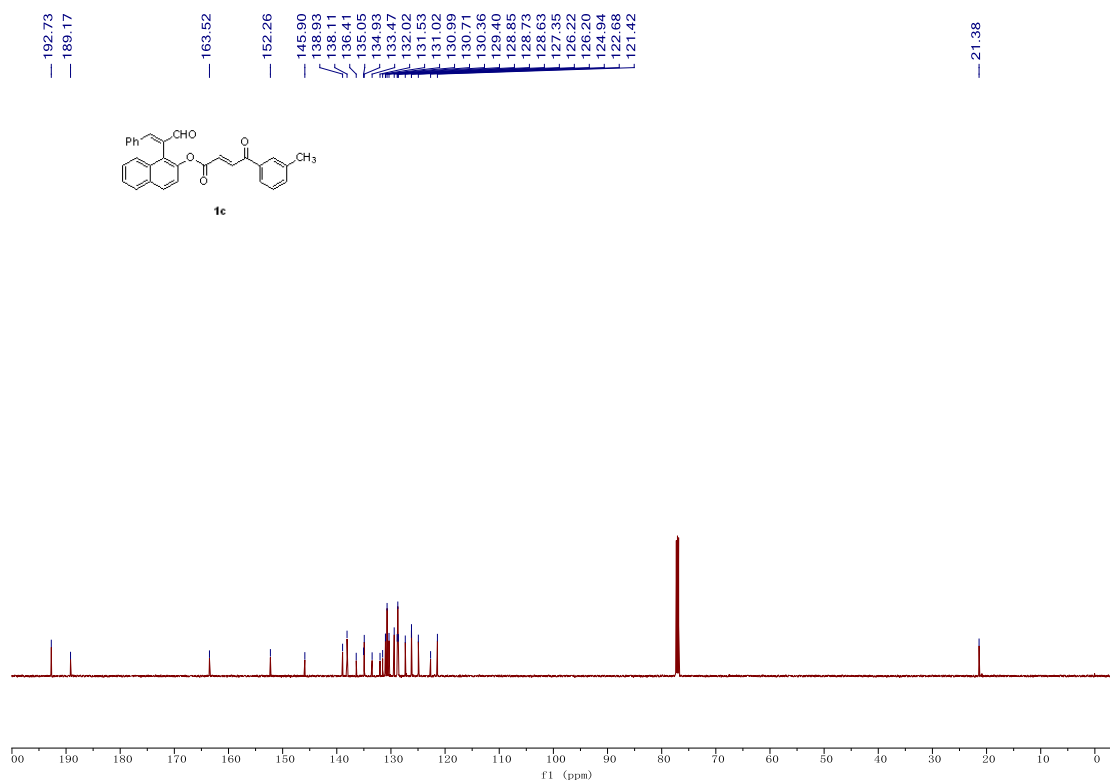

1d

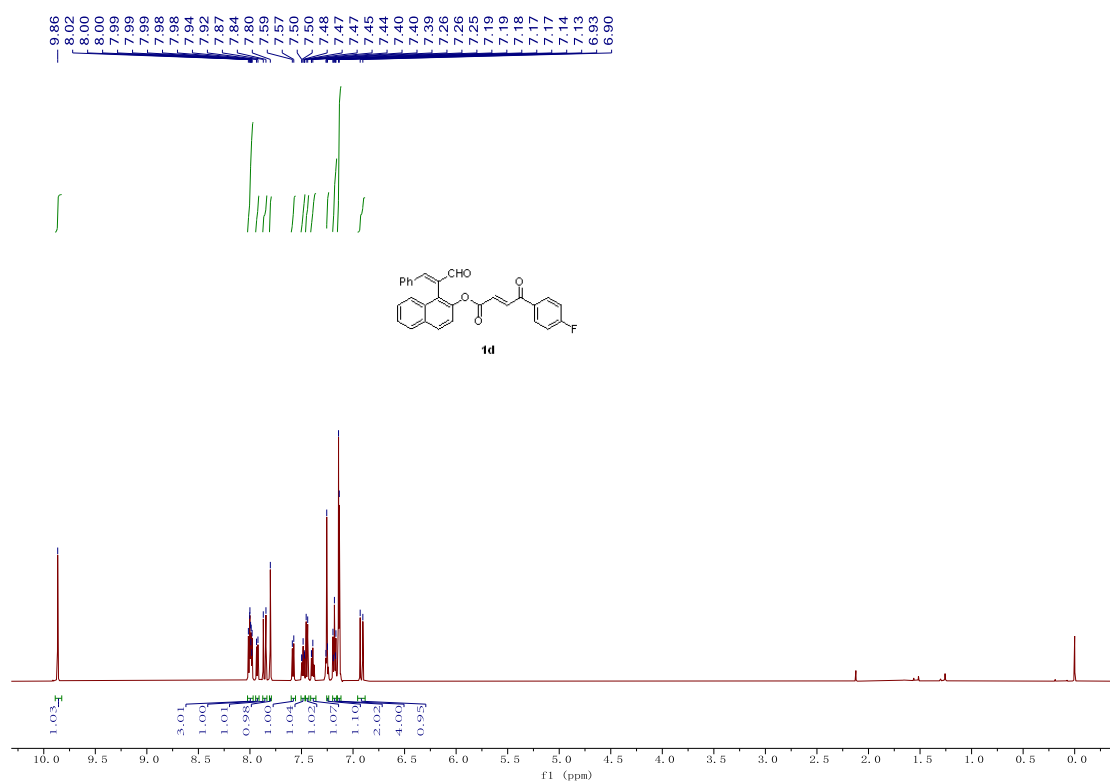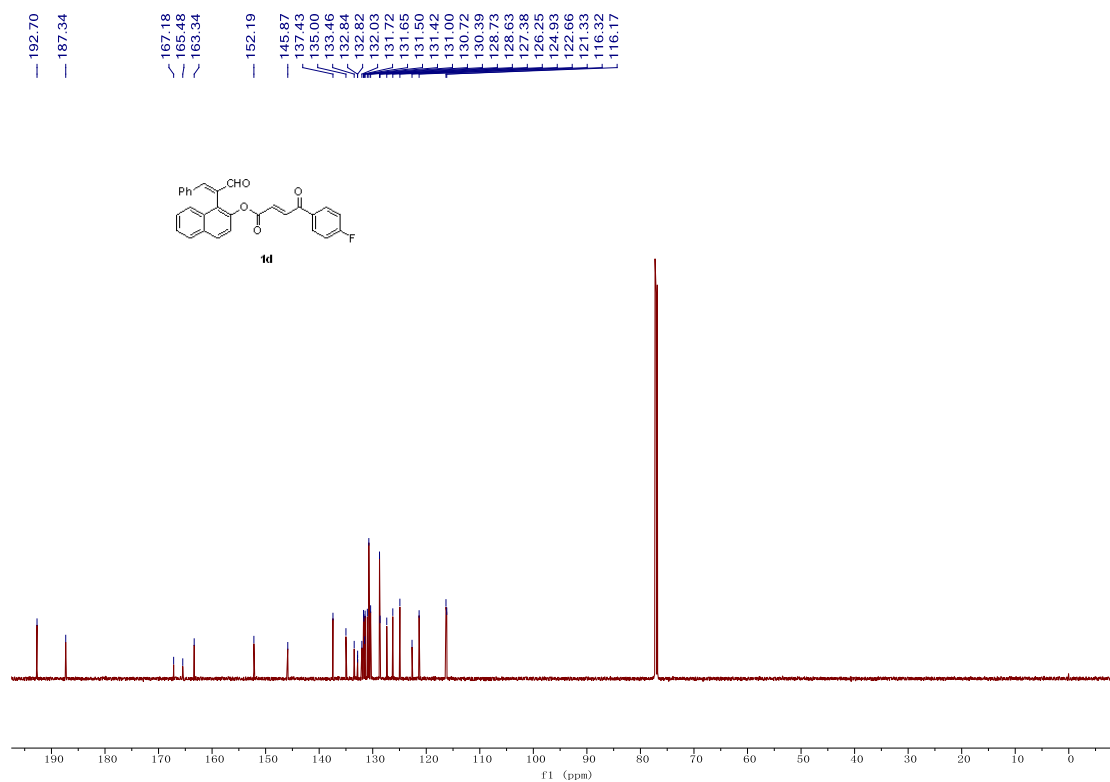

1e

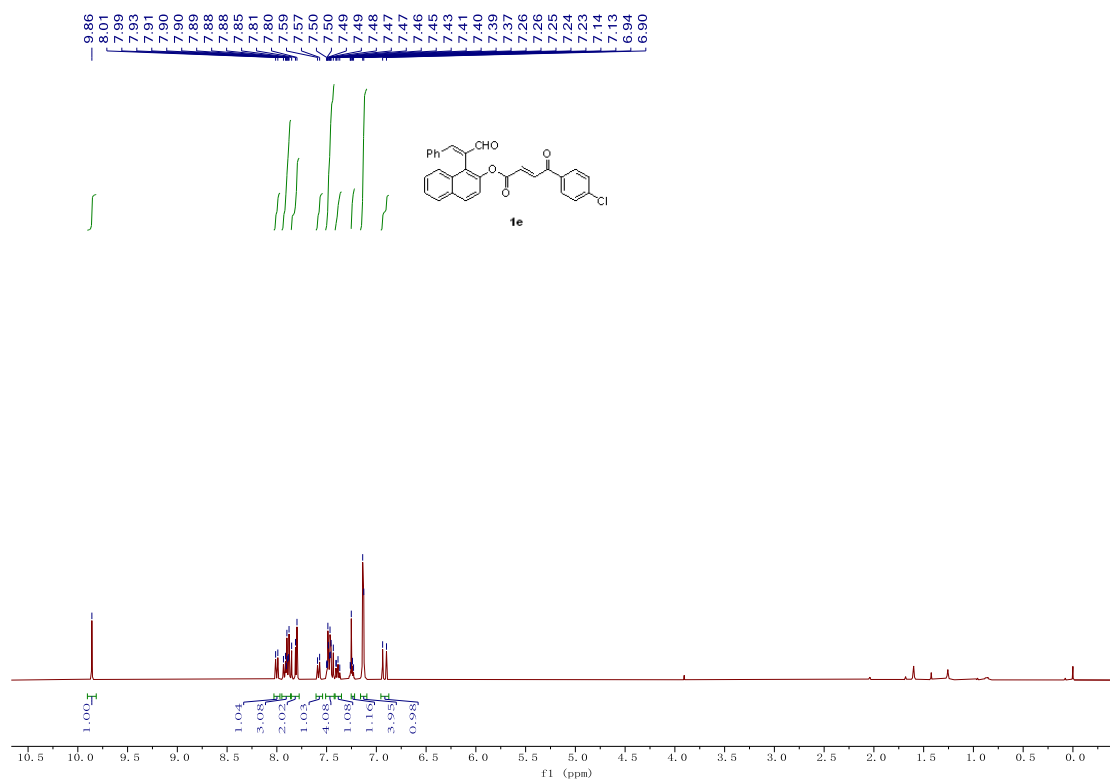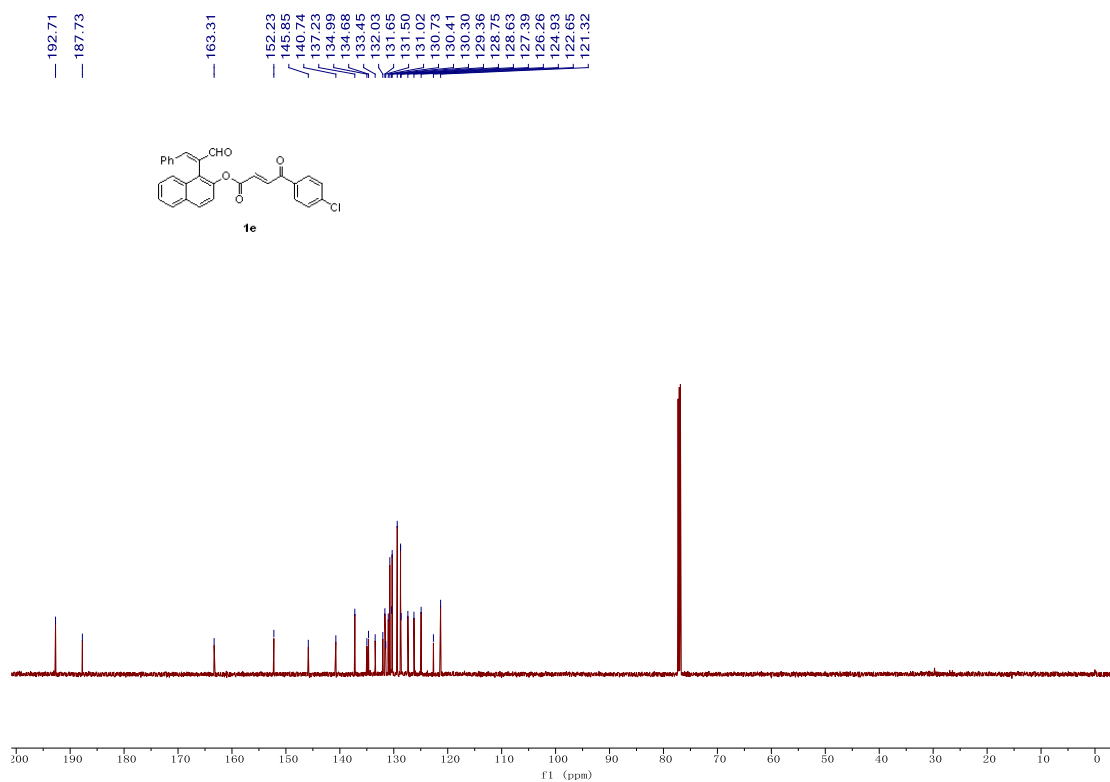

1f

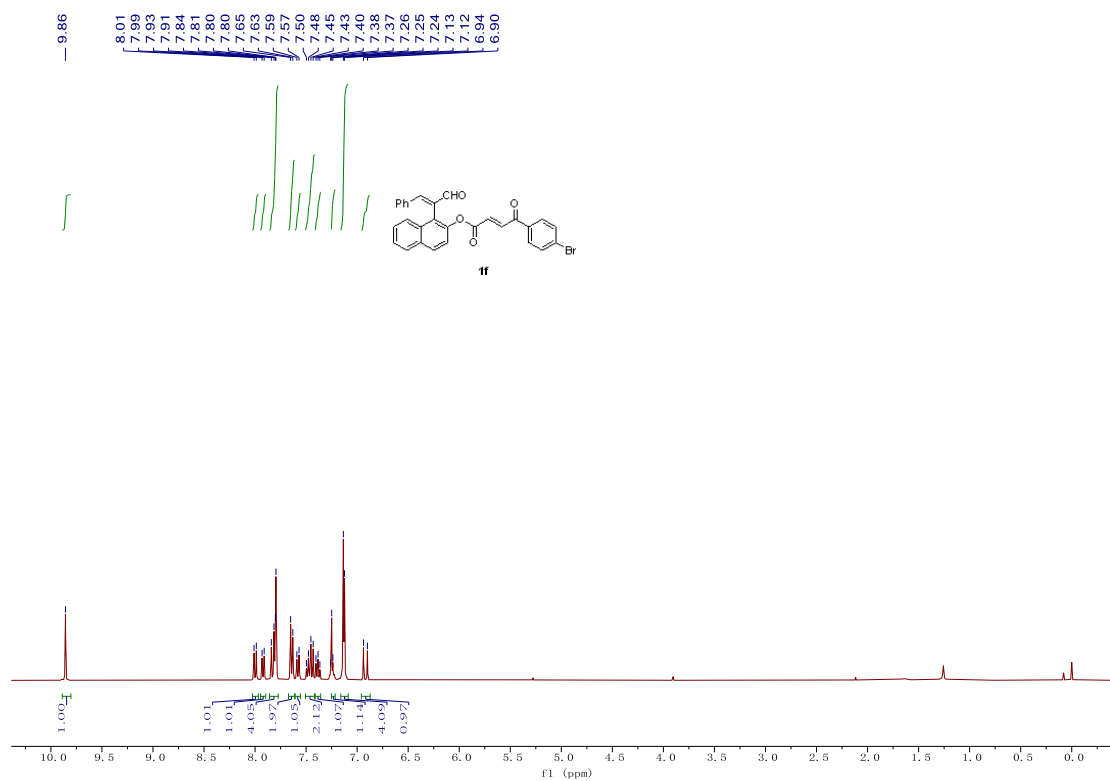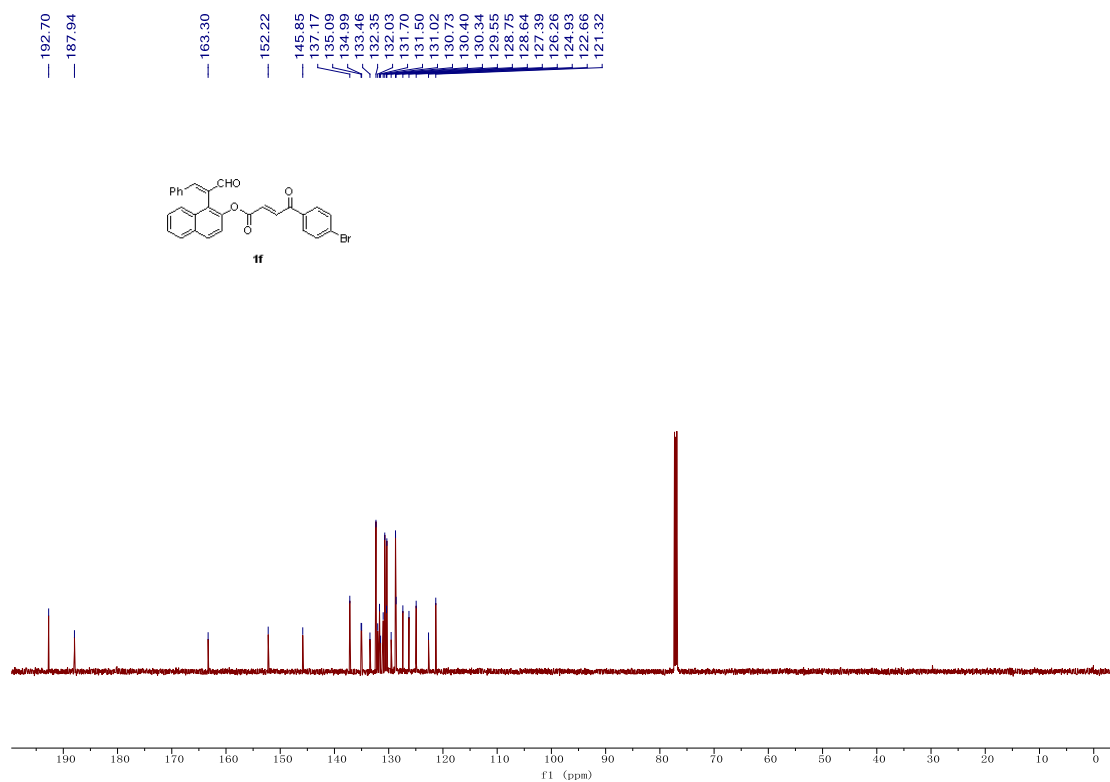

1g

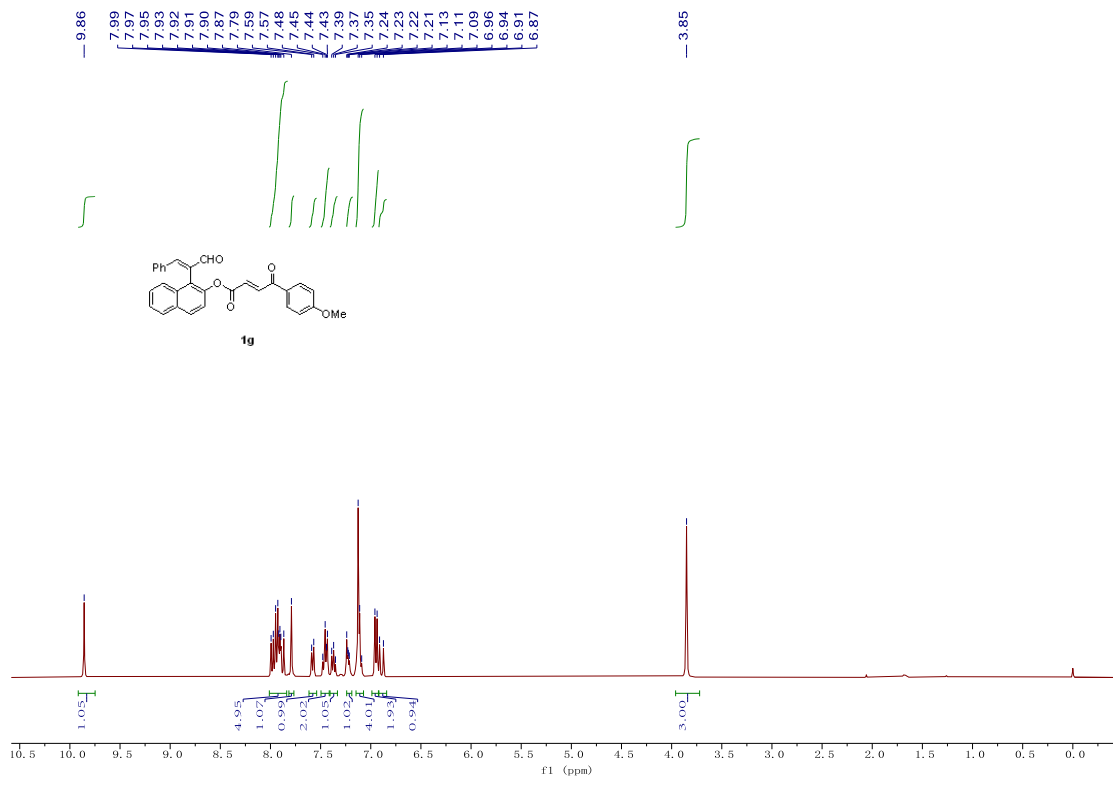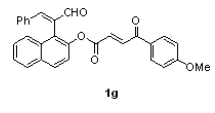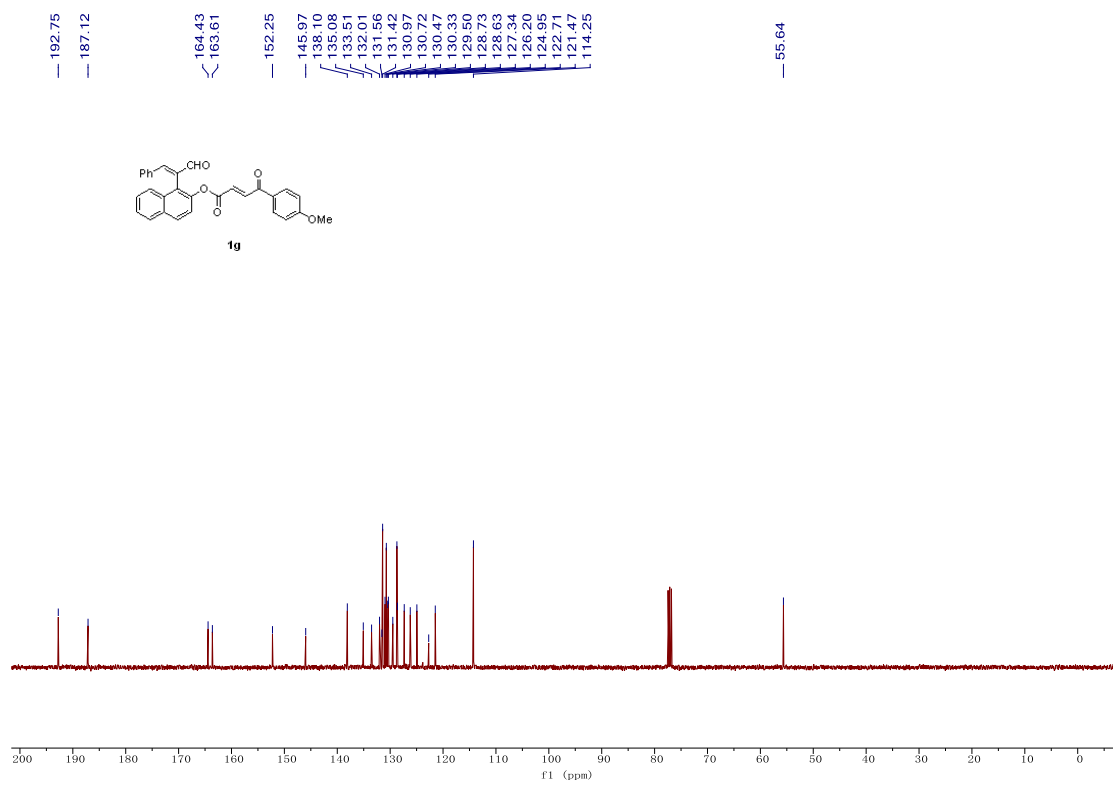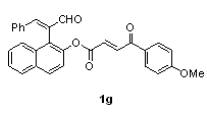

1h

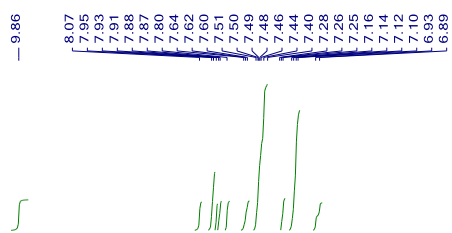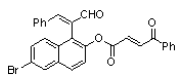

1h

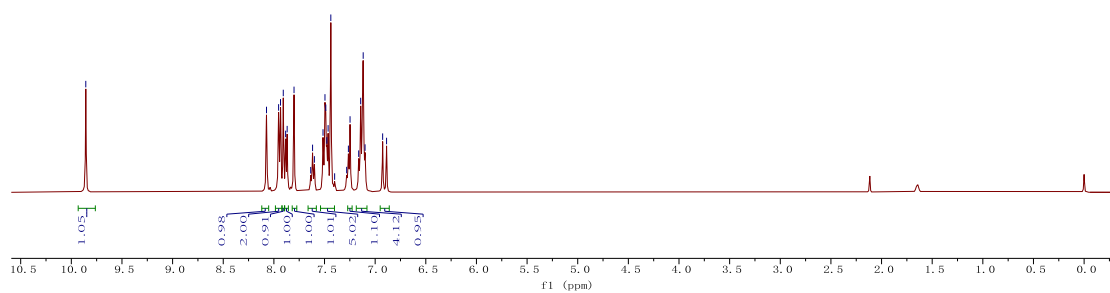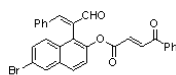

1h

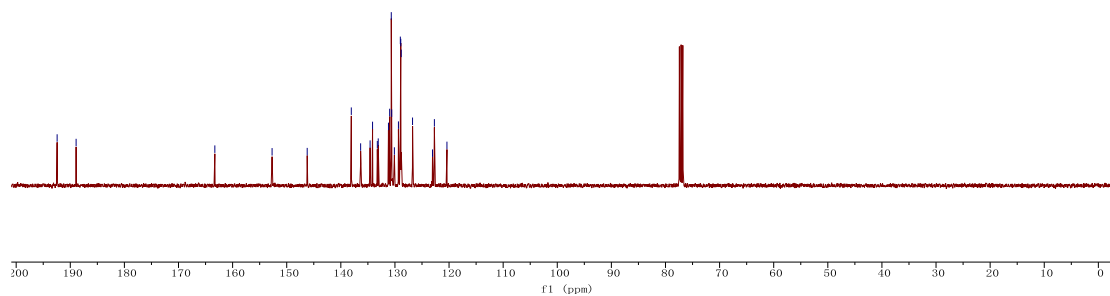

1i

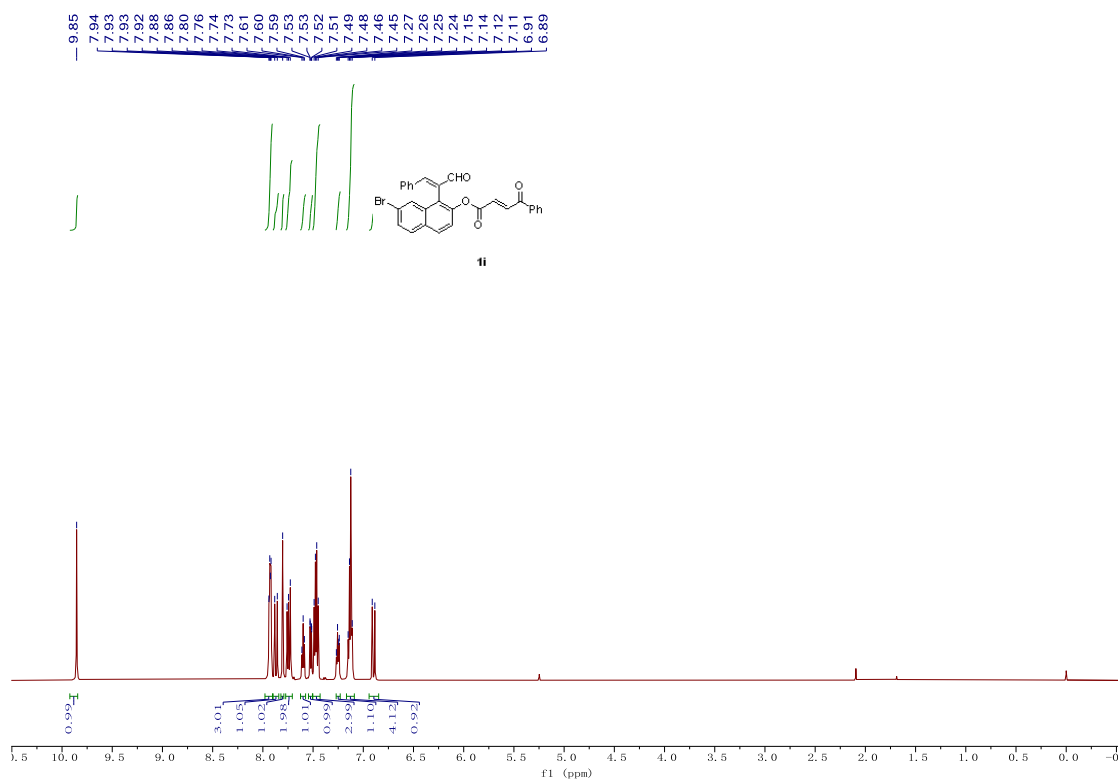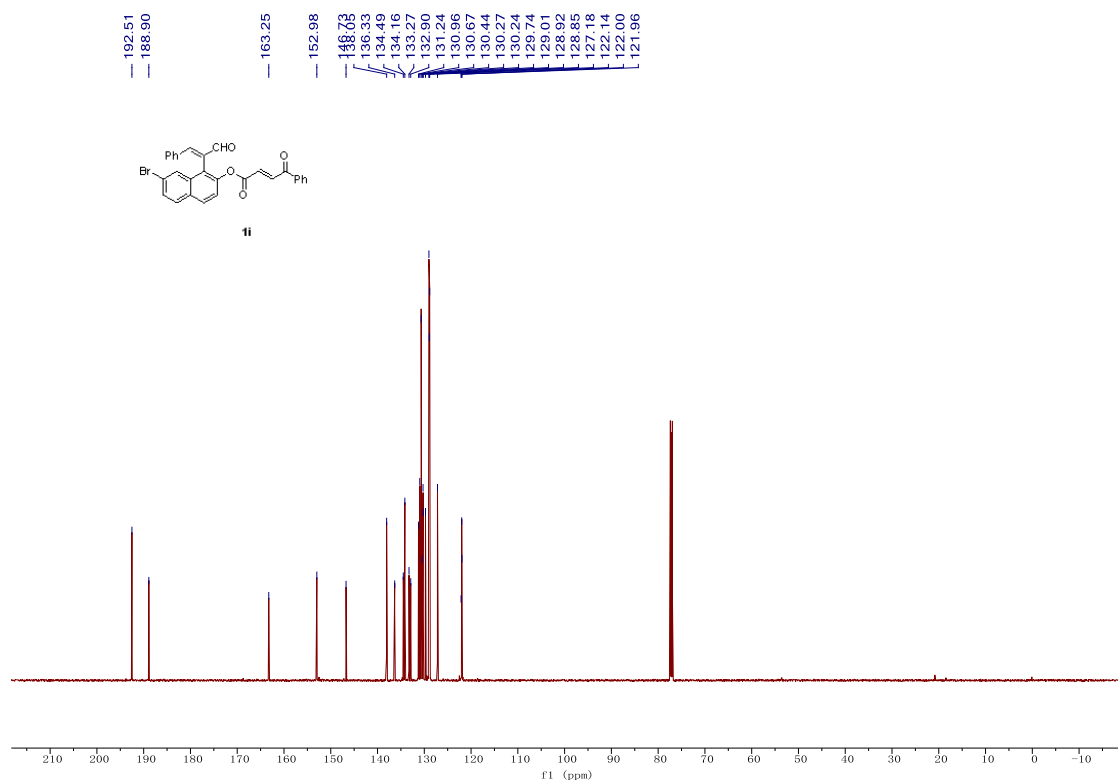

1j

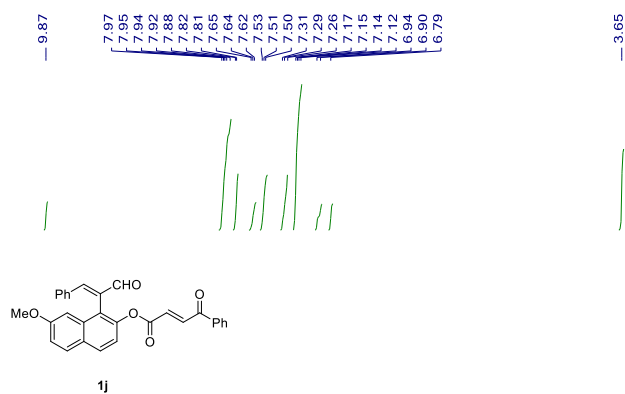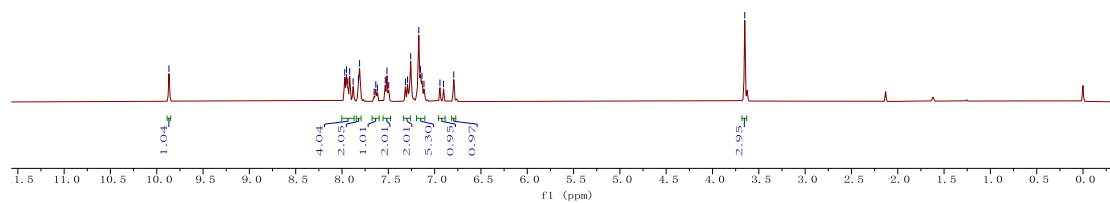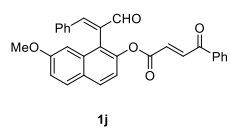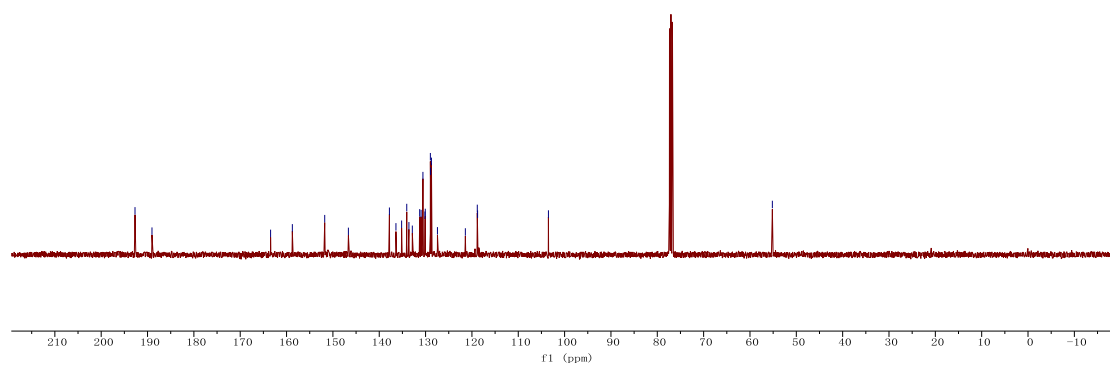



**1k**

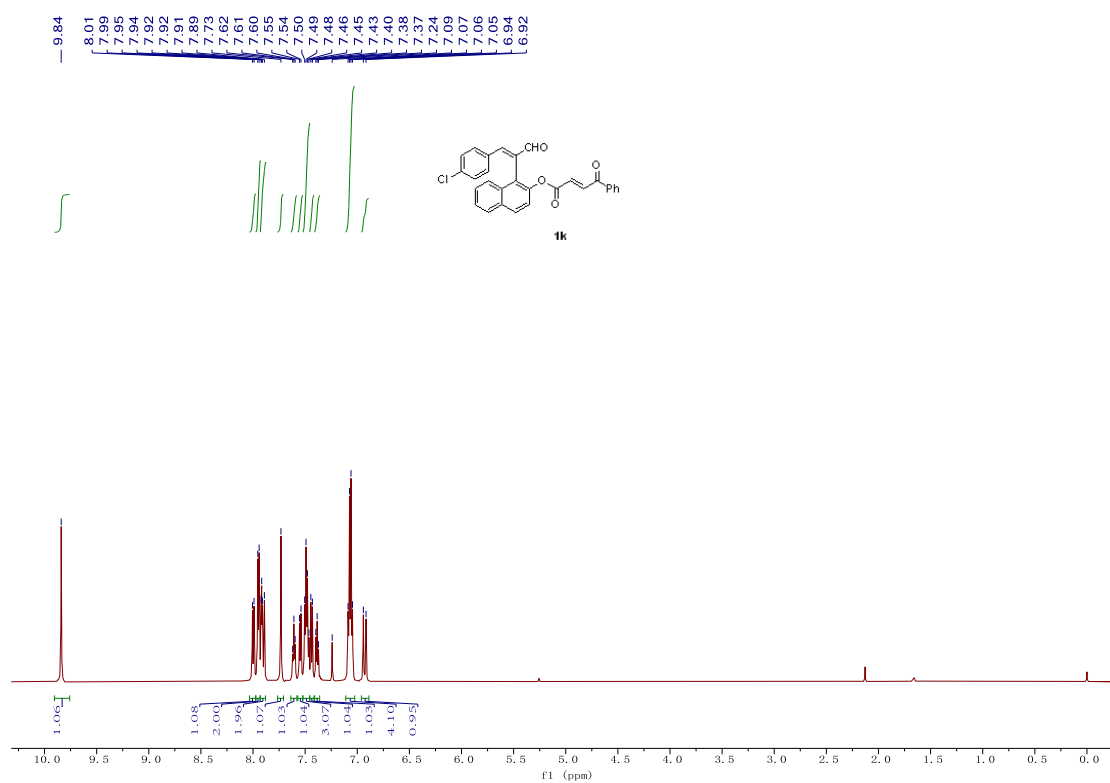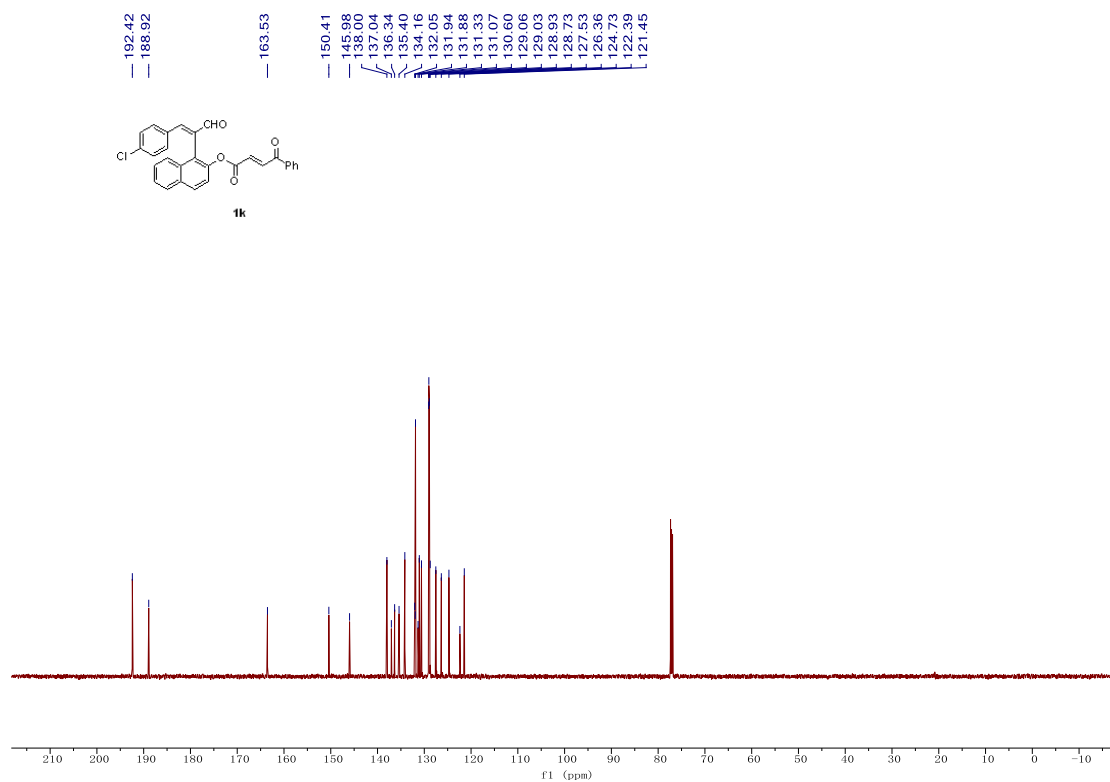

11

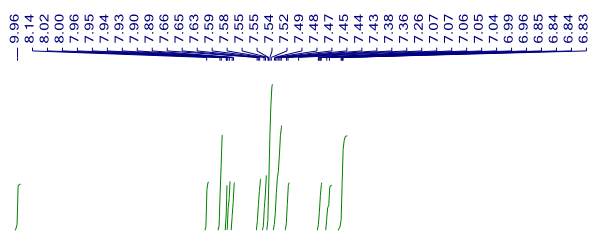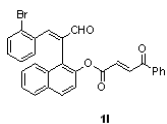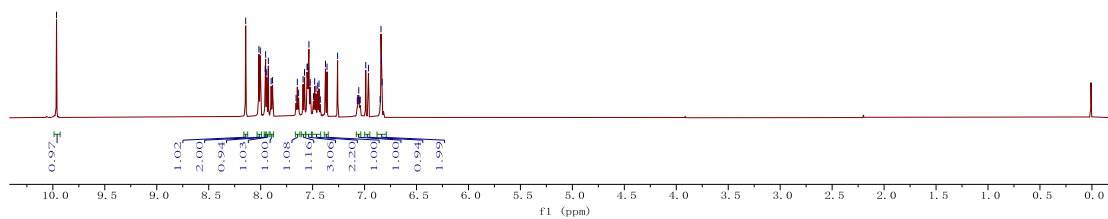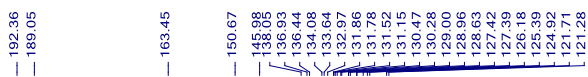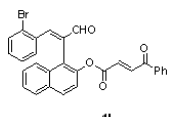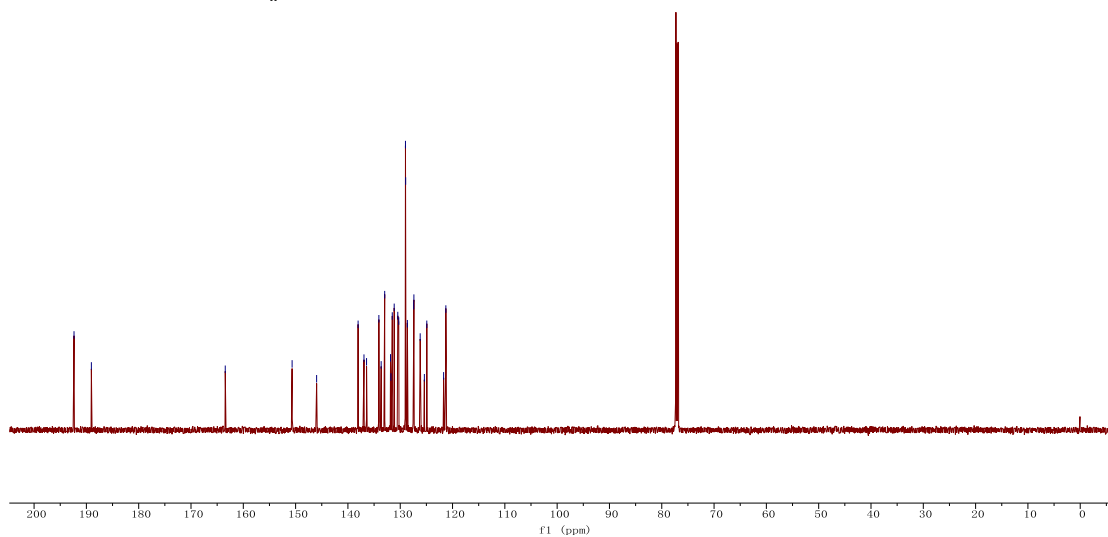



1n

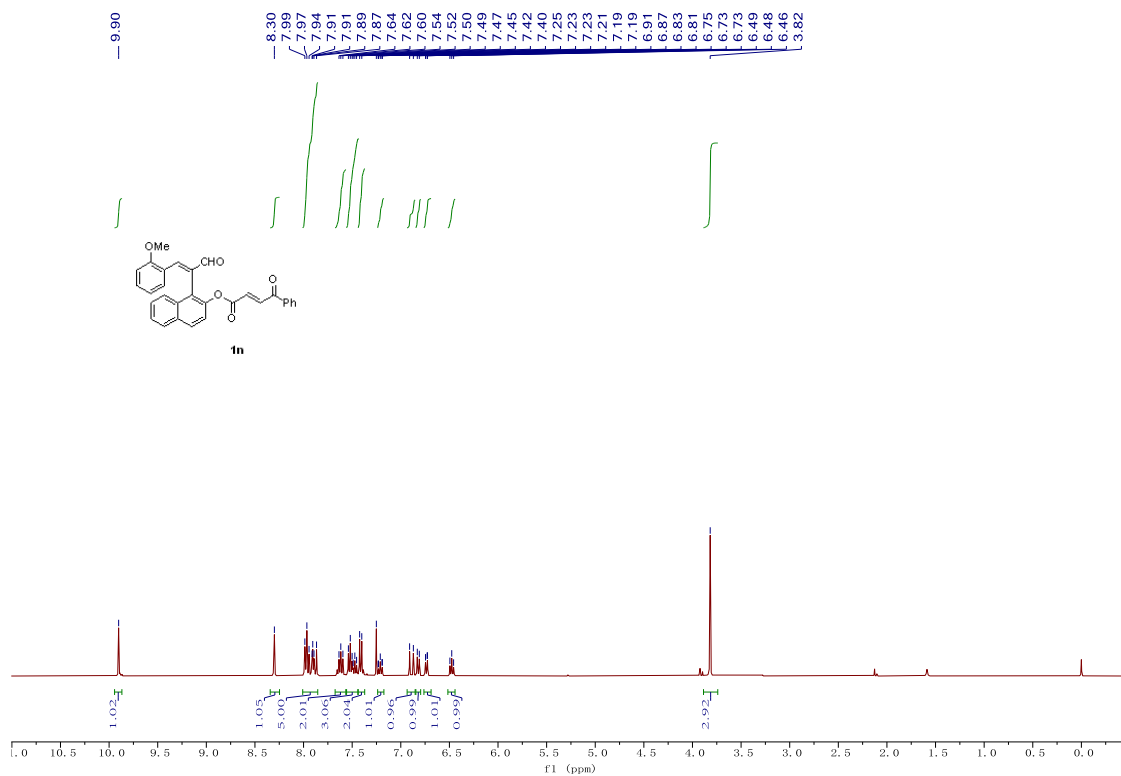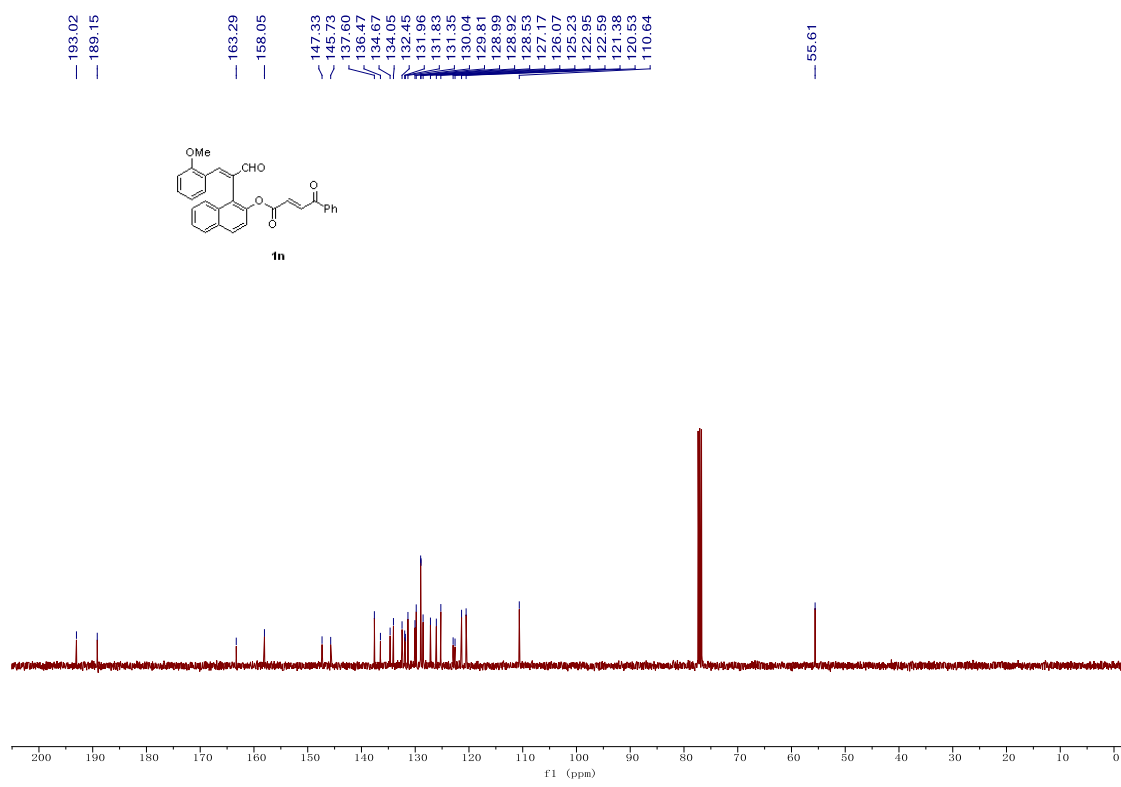

# 3aa

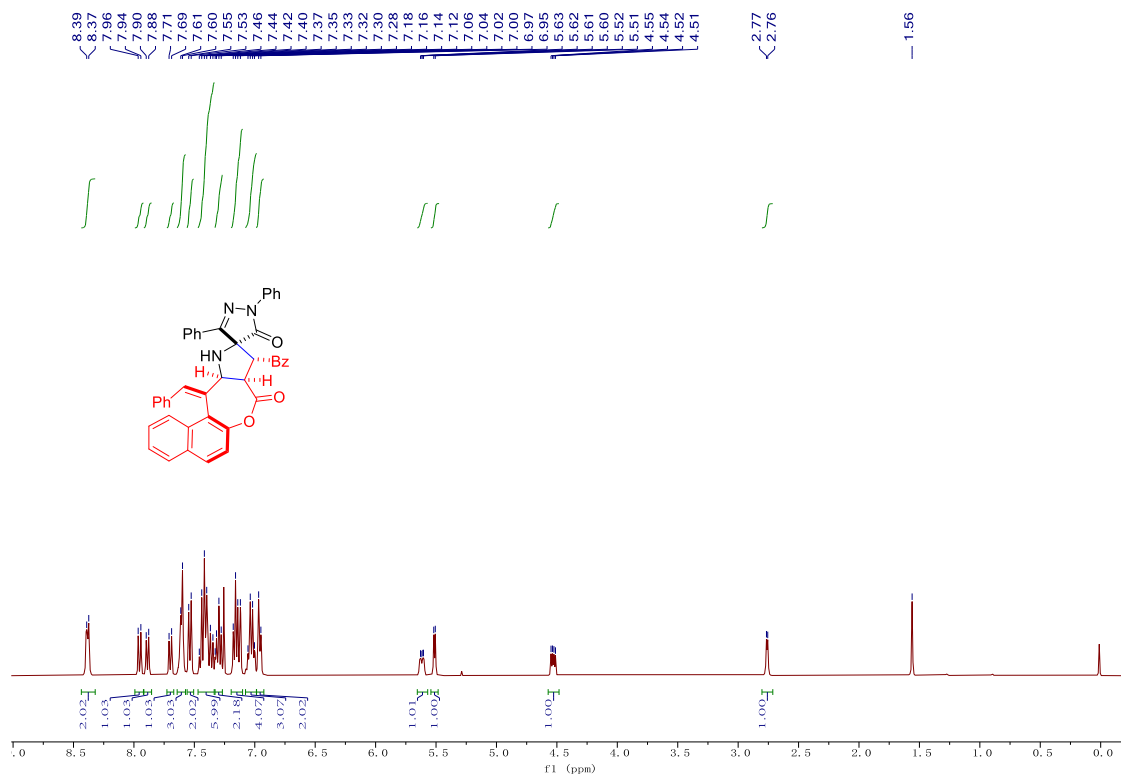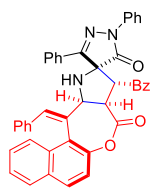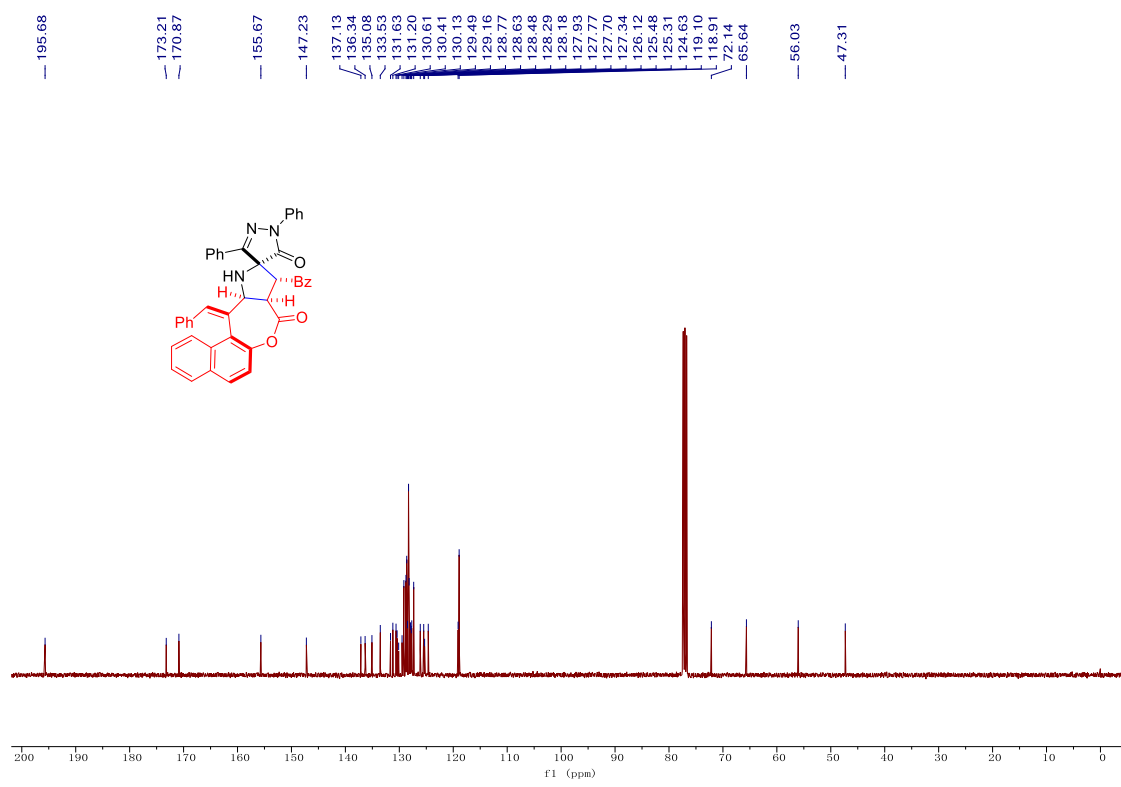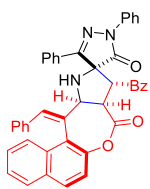

### 3ab

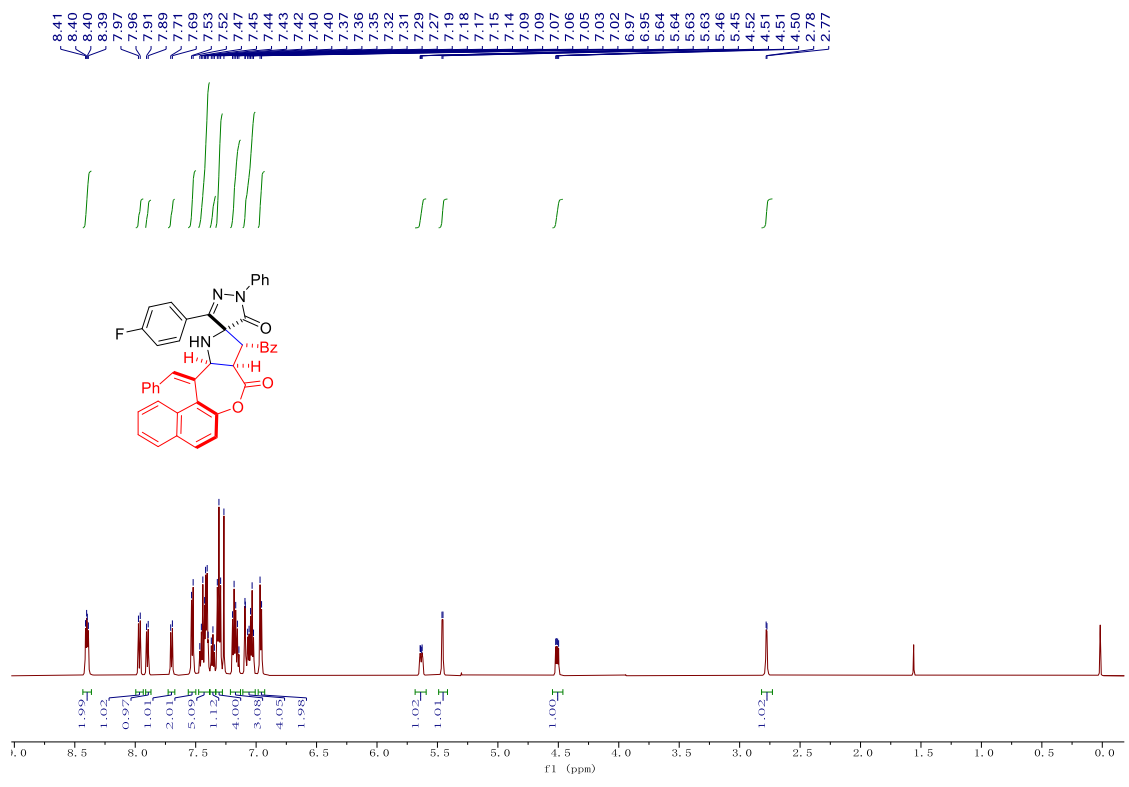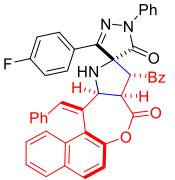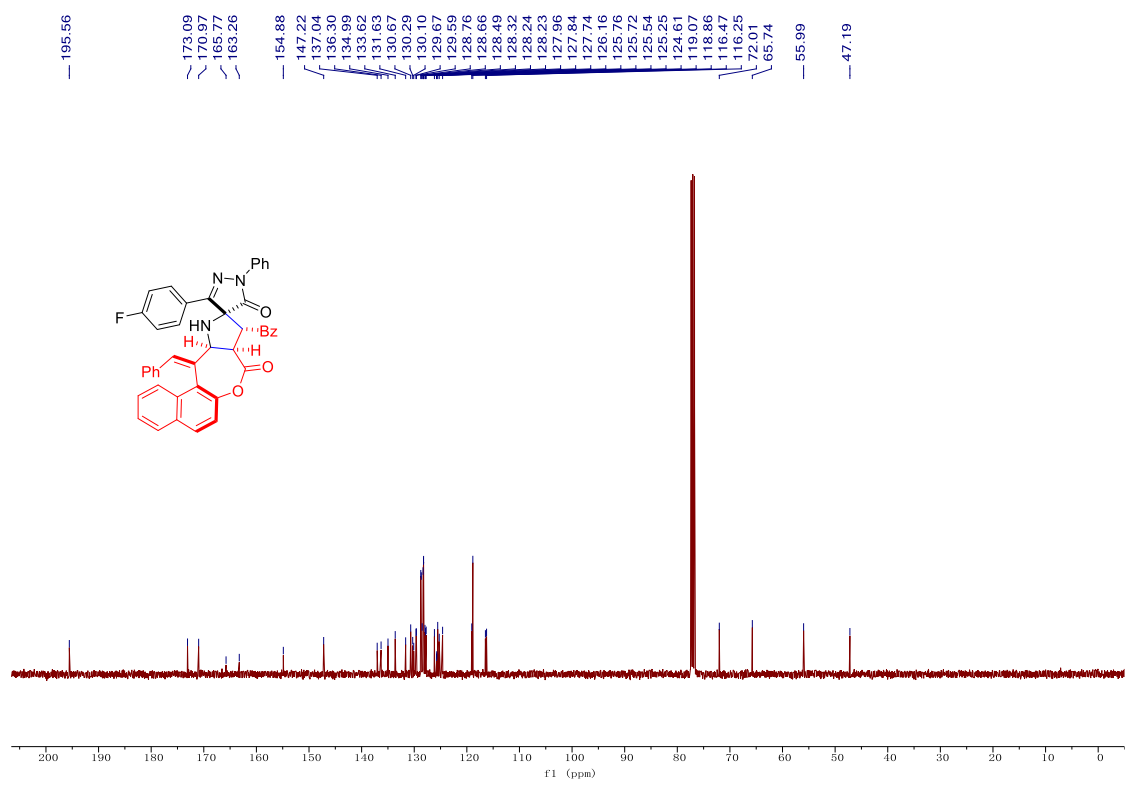

### 3ac

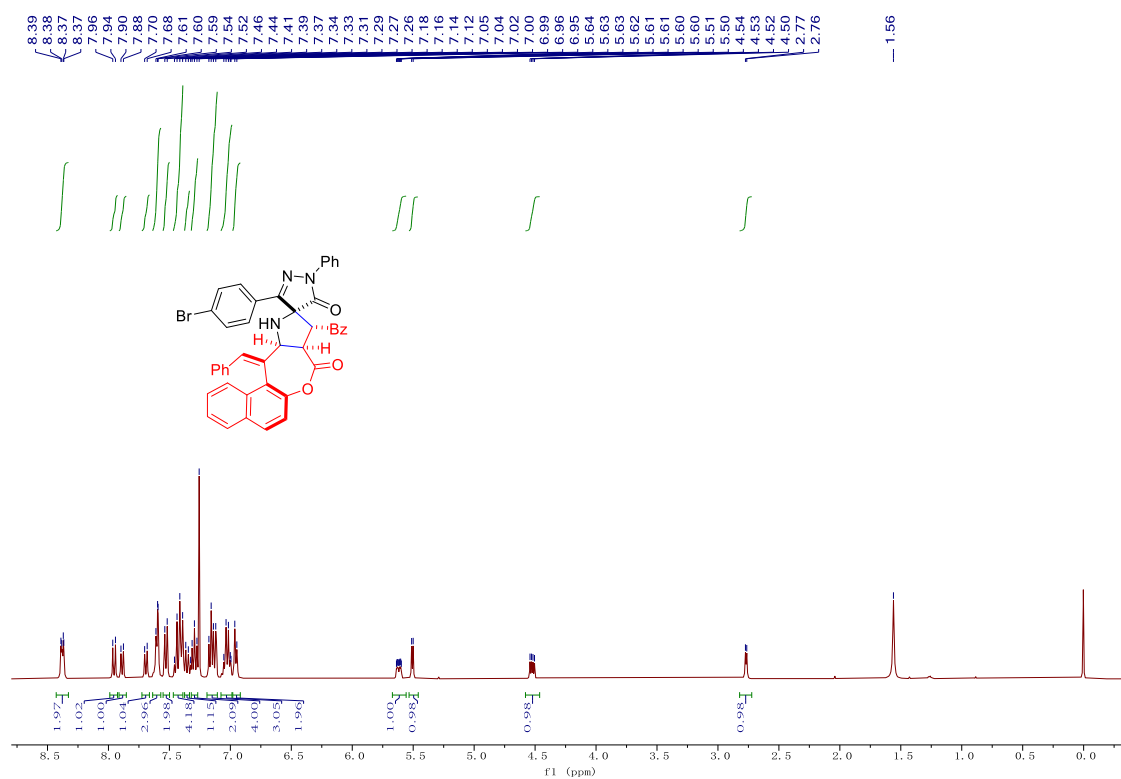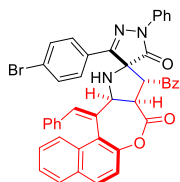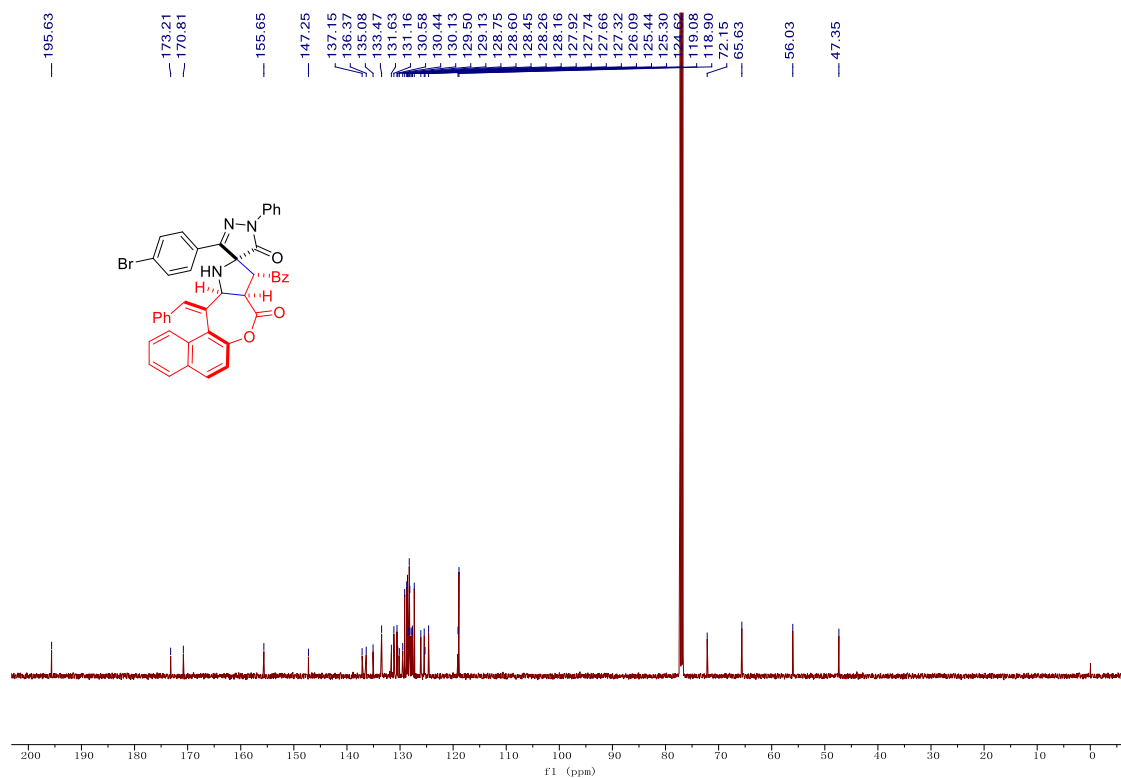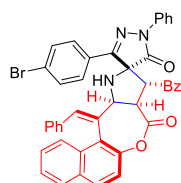

### 3ad

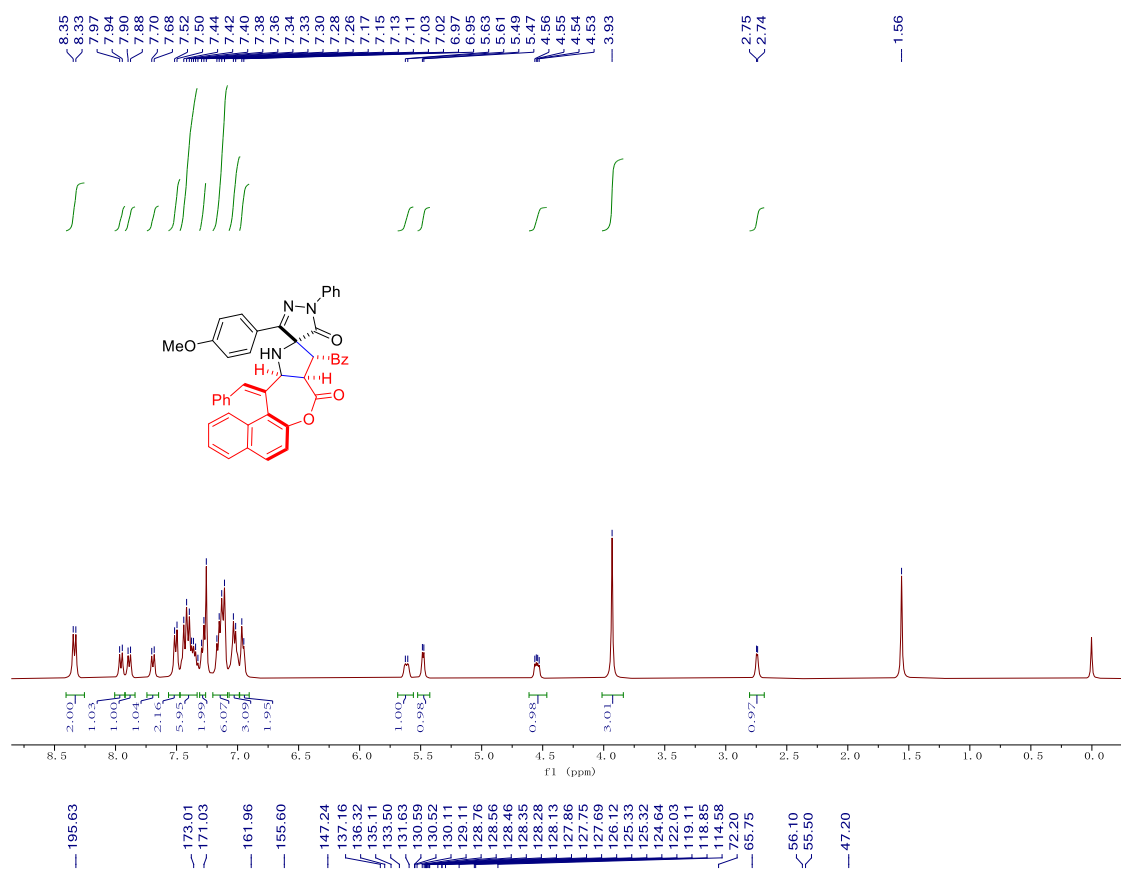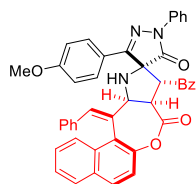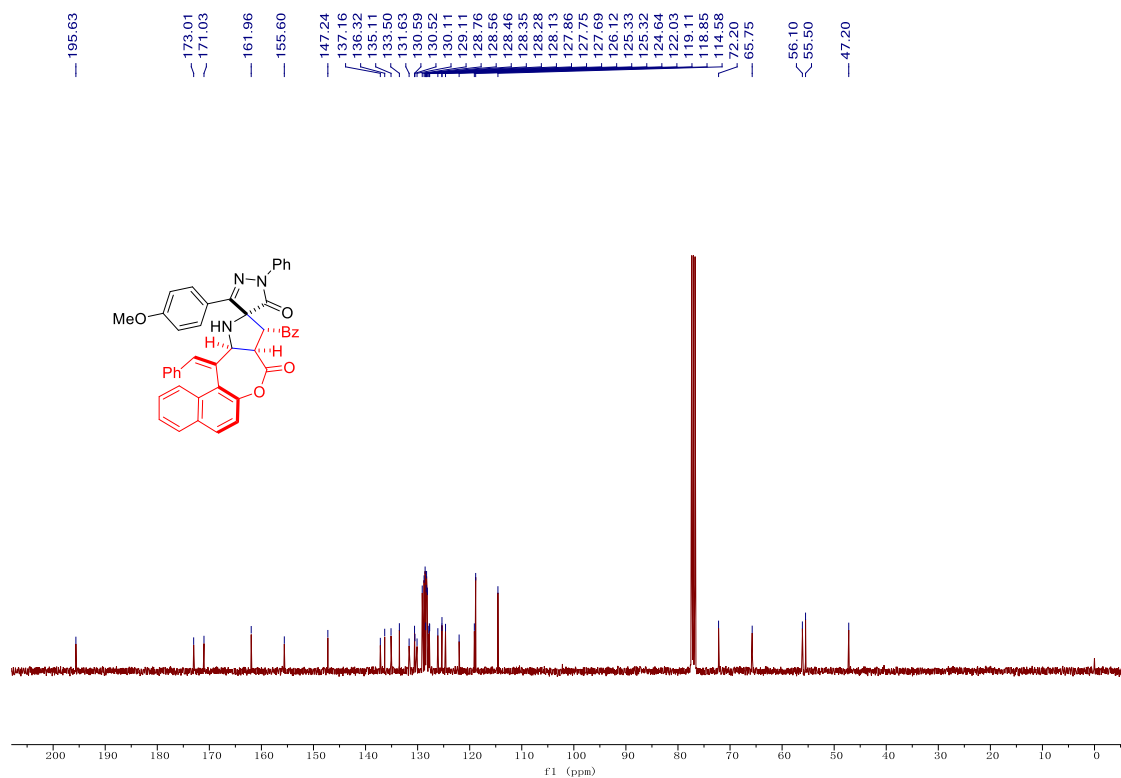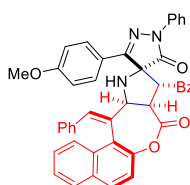



### 3ae

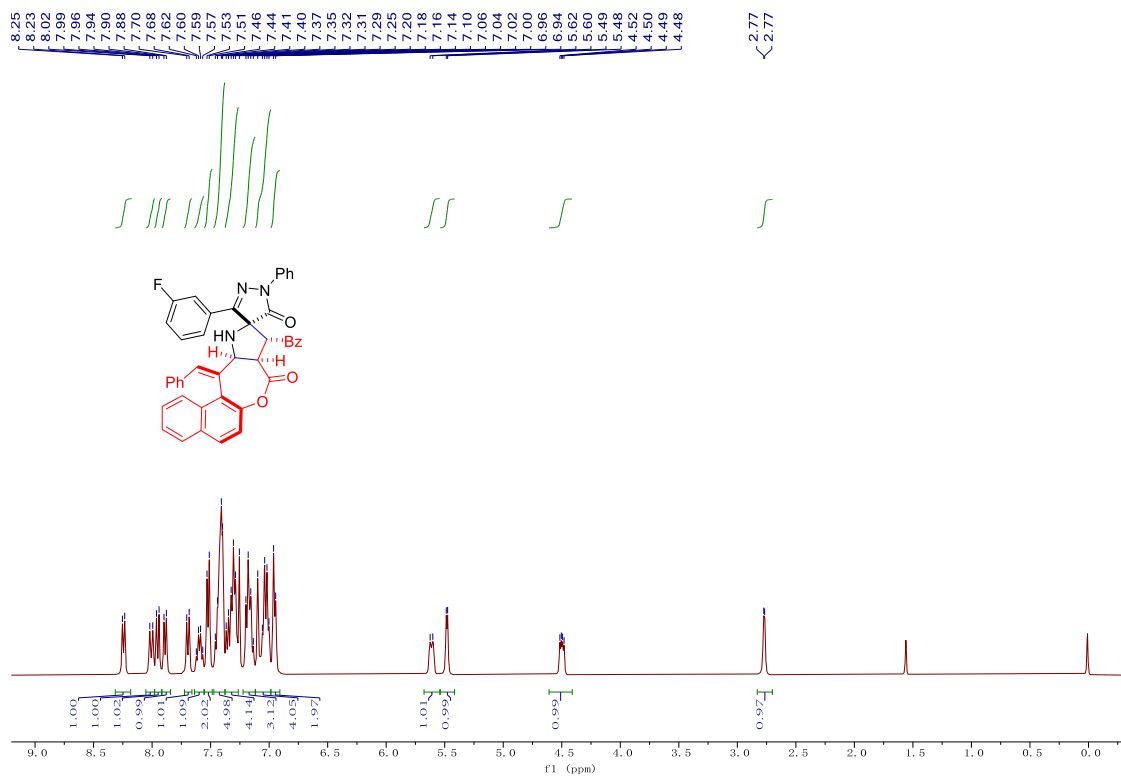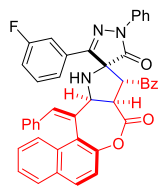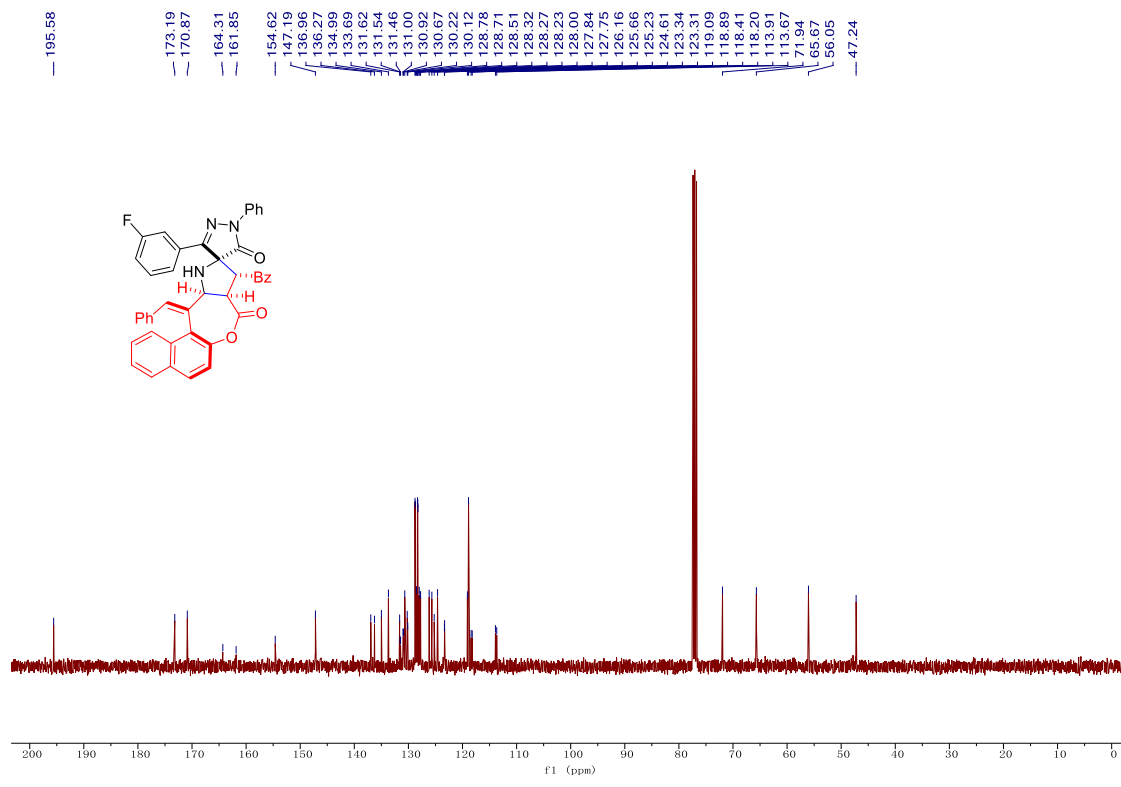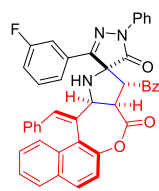

# 3af

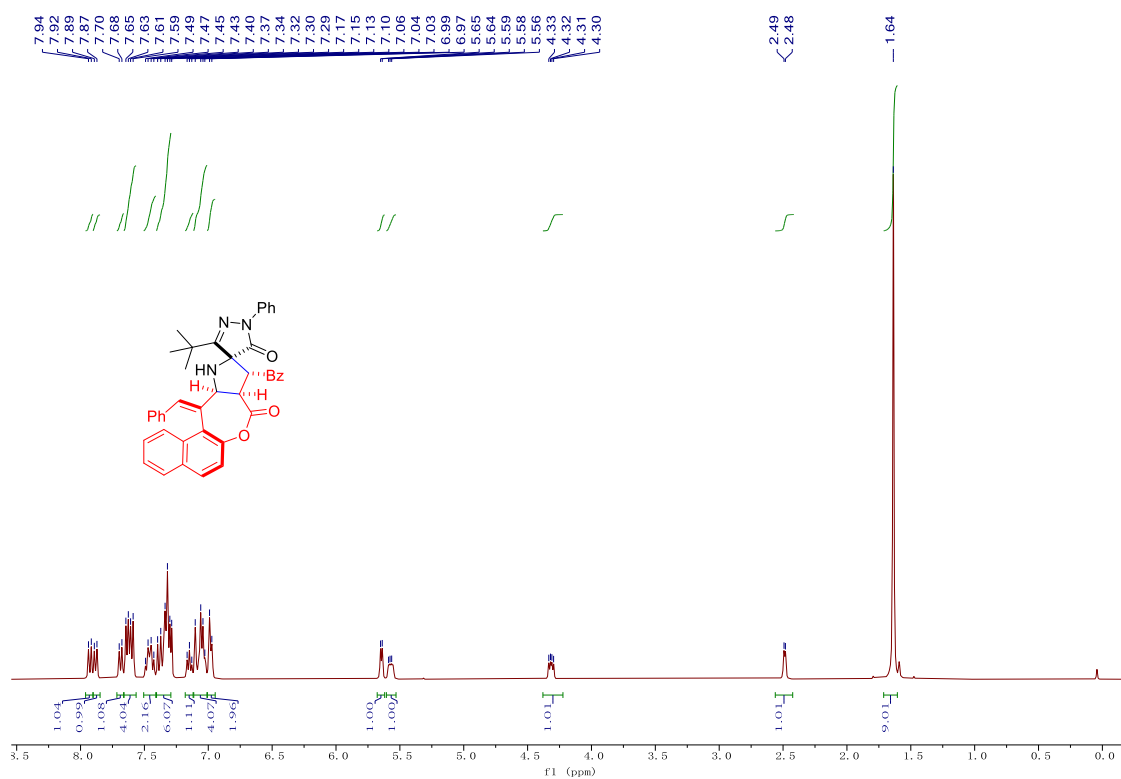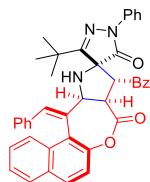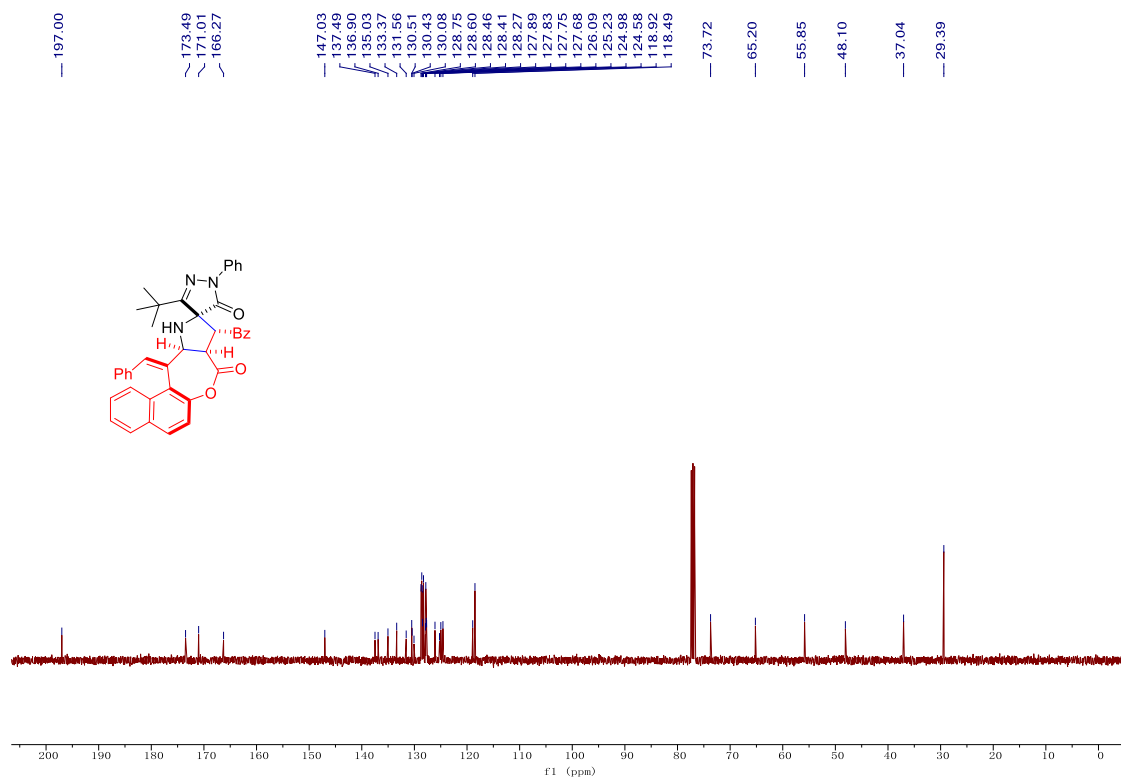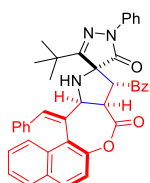

3ag

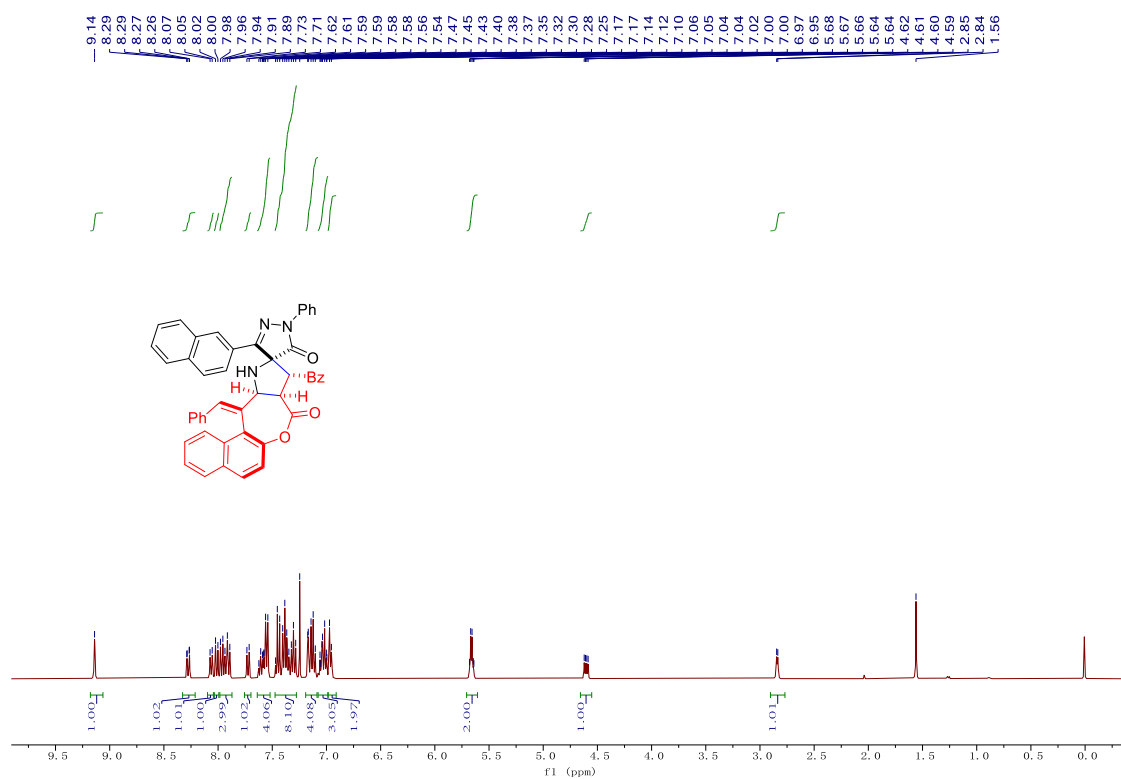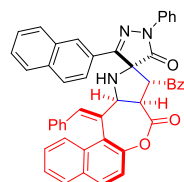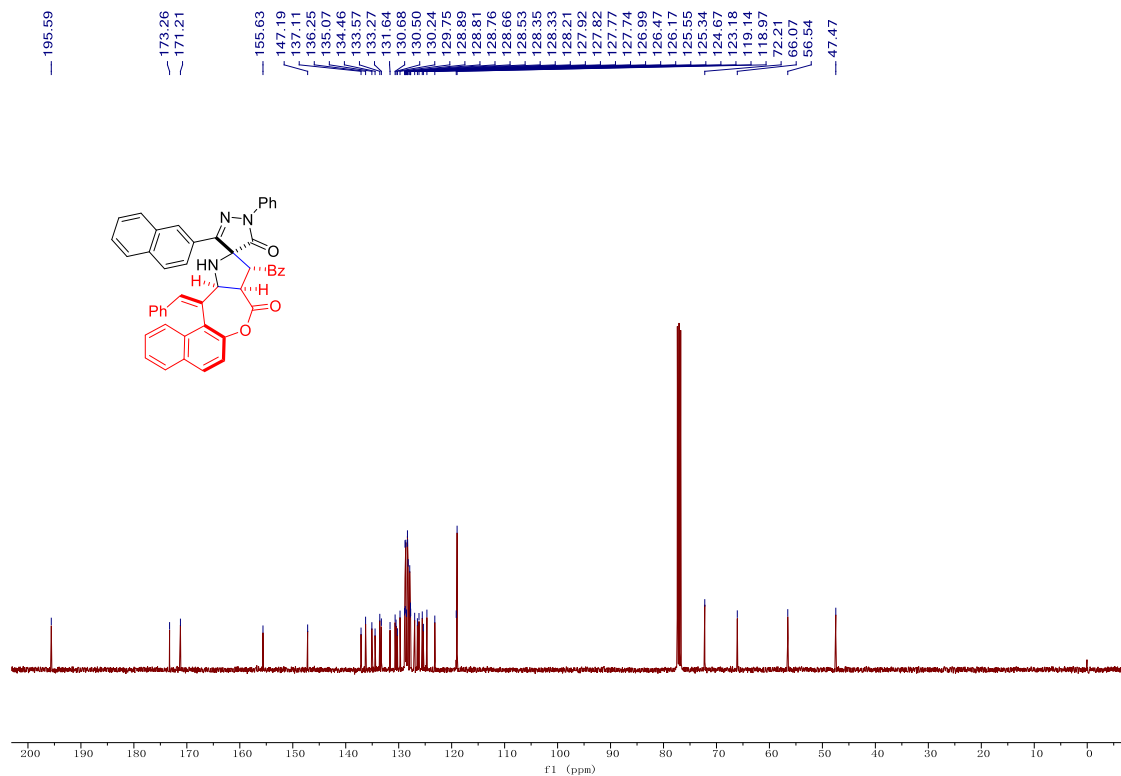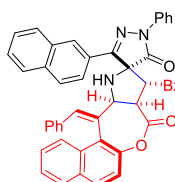

3ah

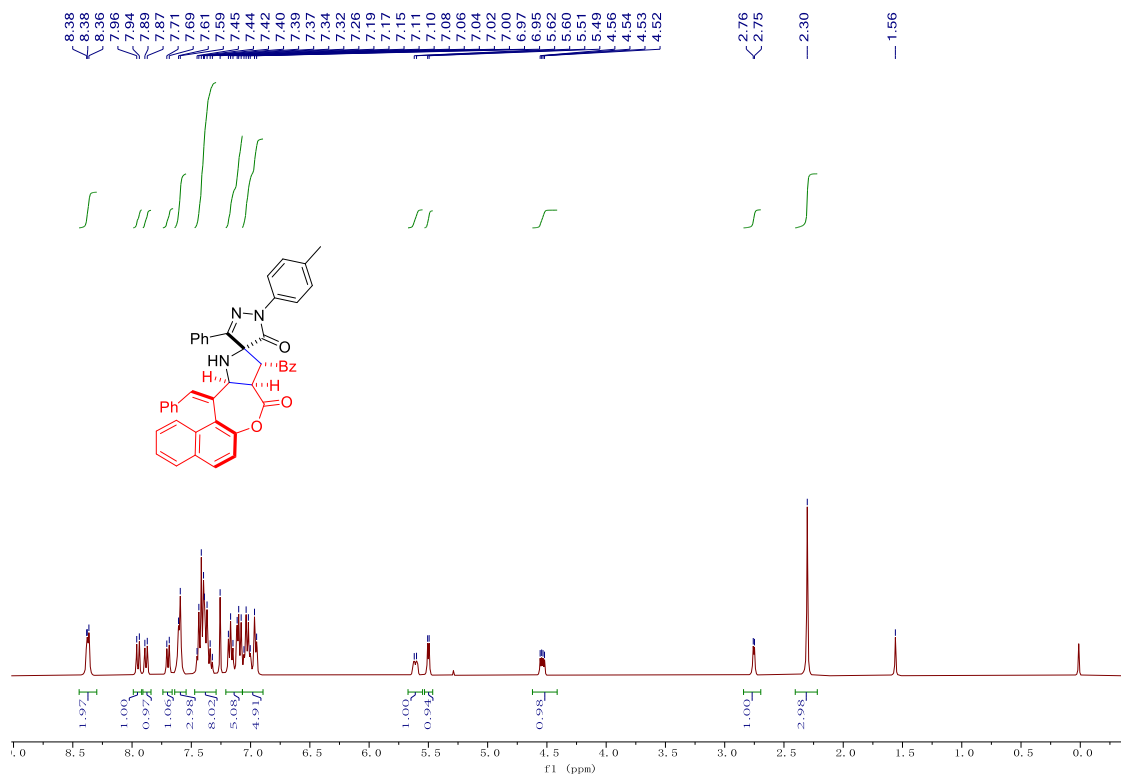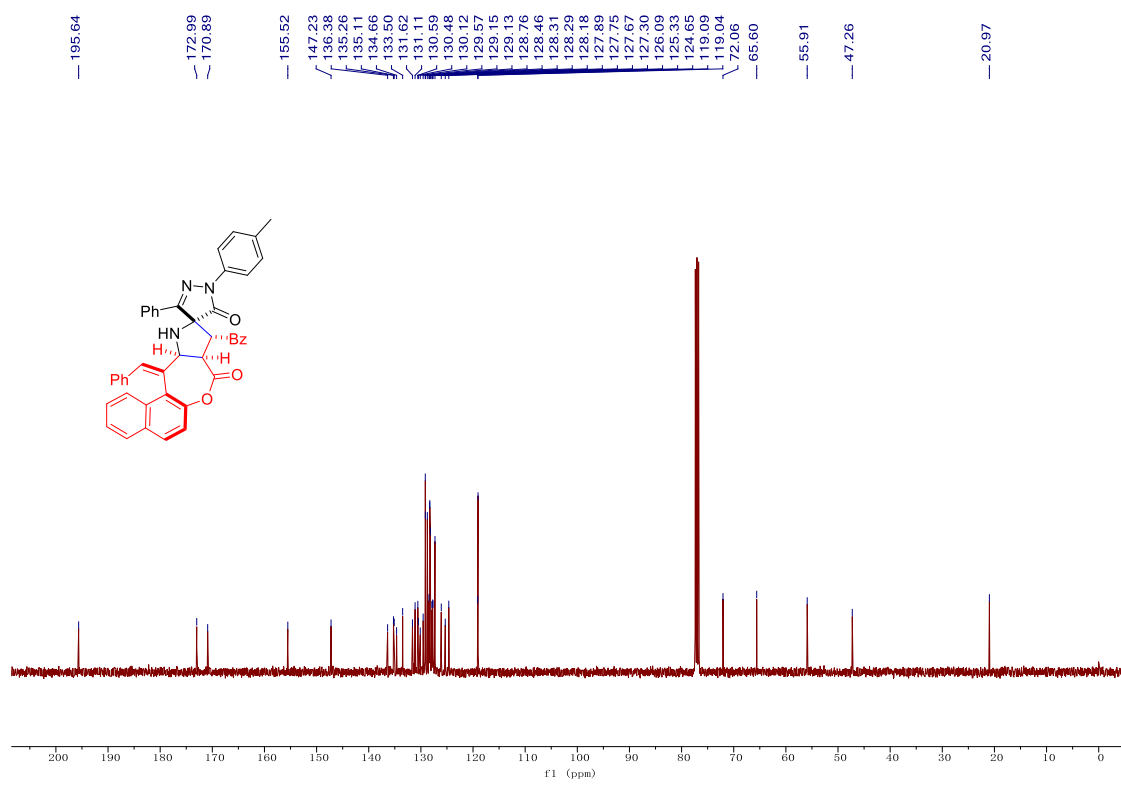

# 3ai

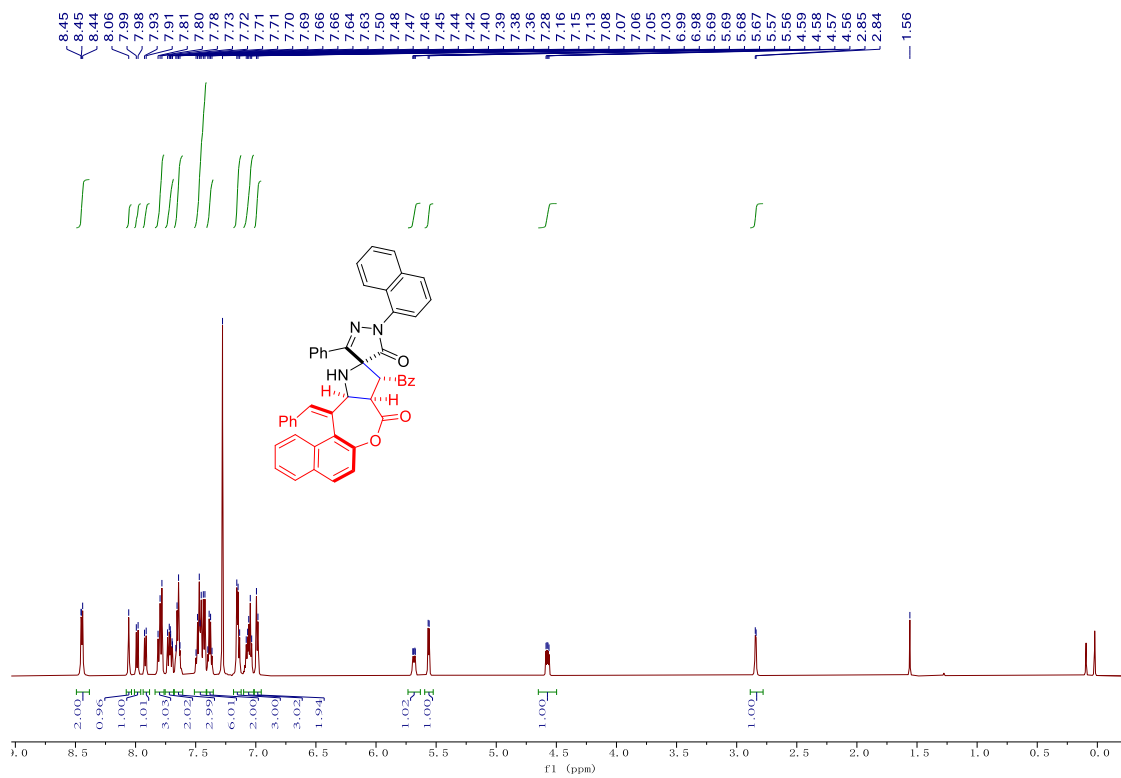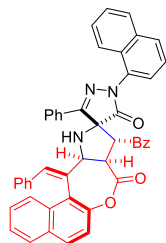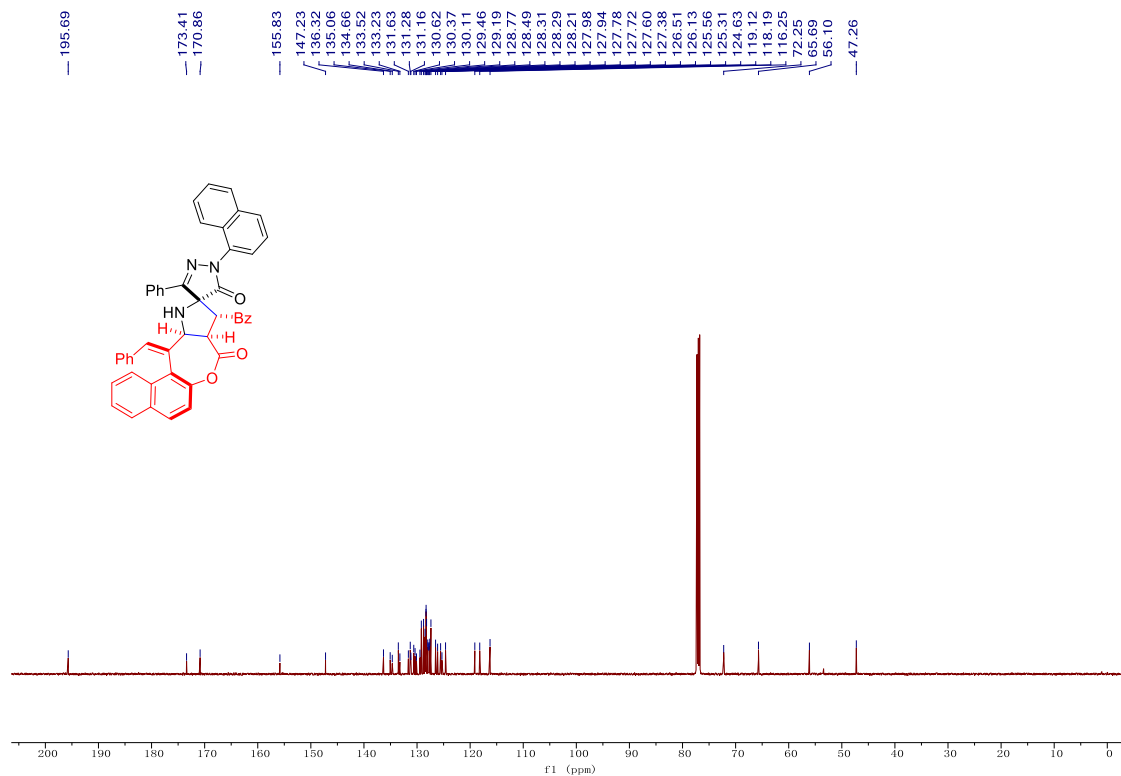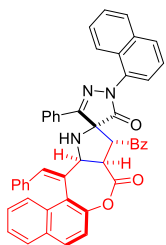

# 3ba

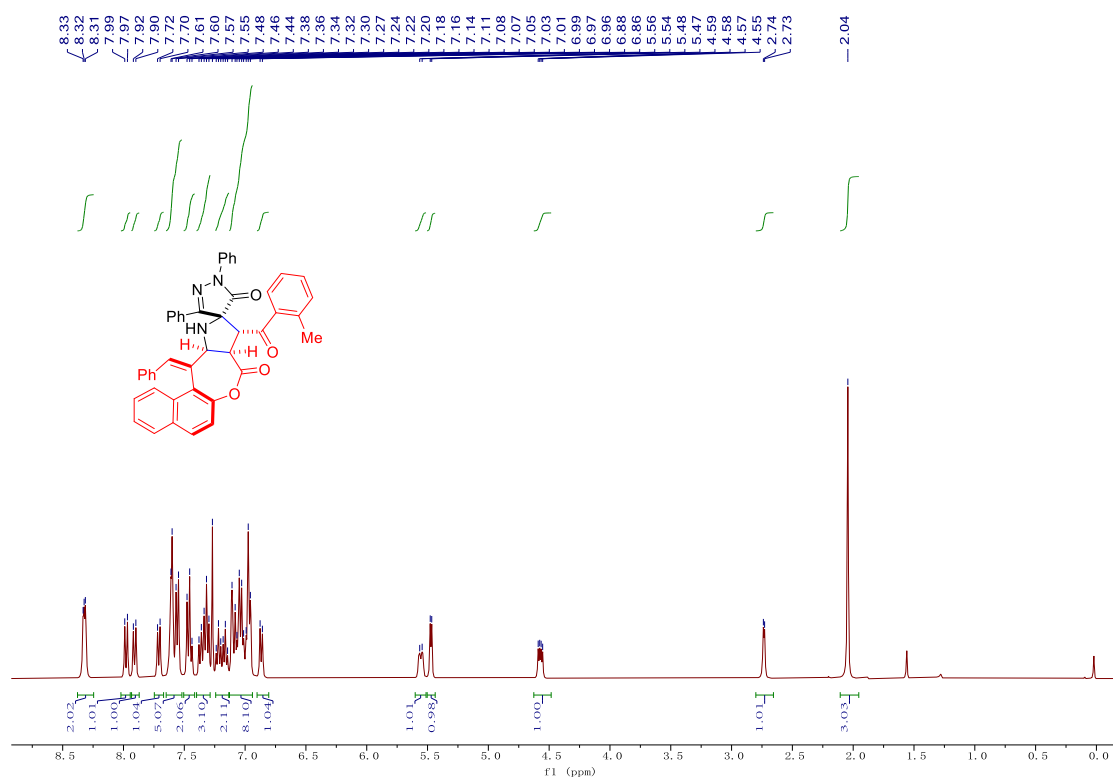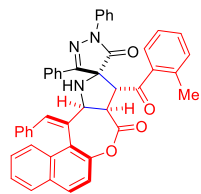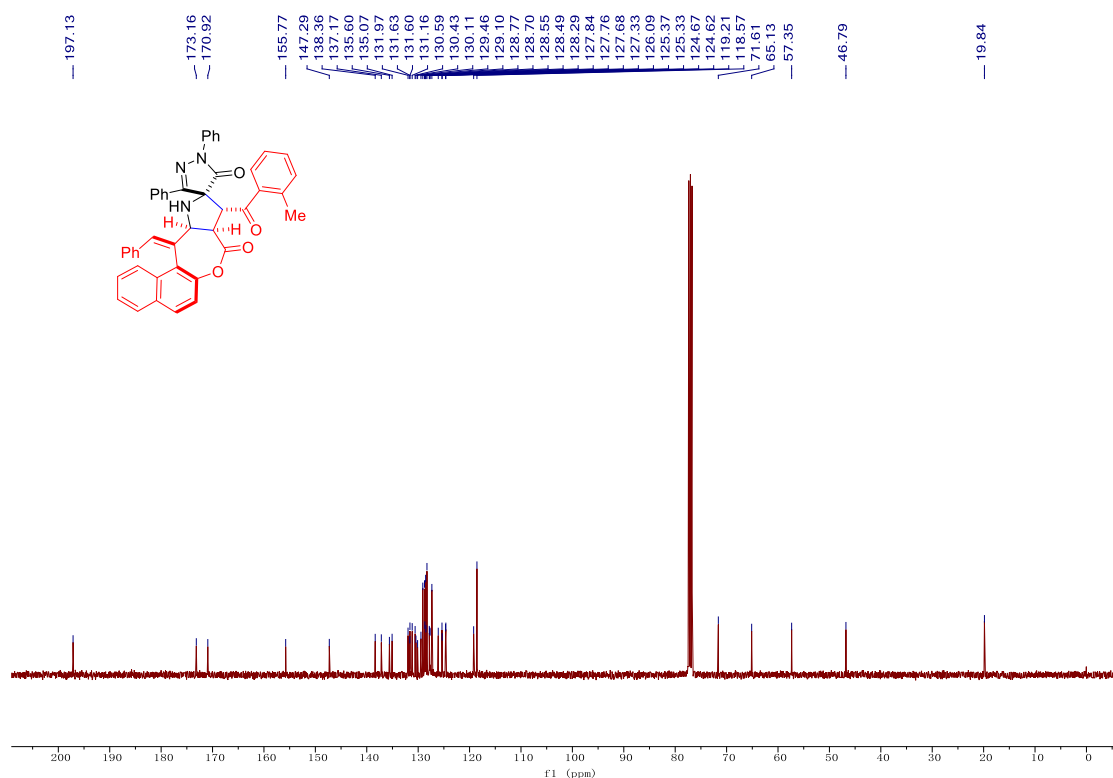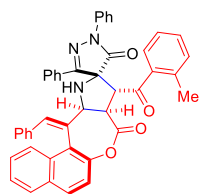

3ca

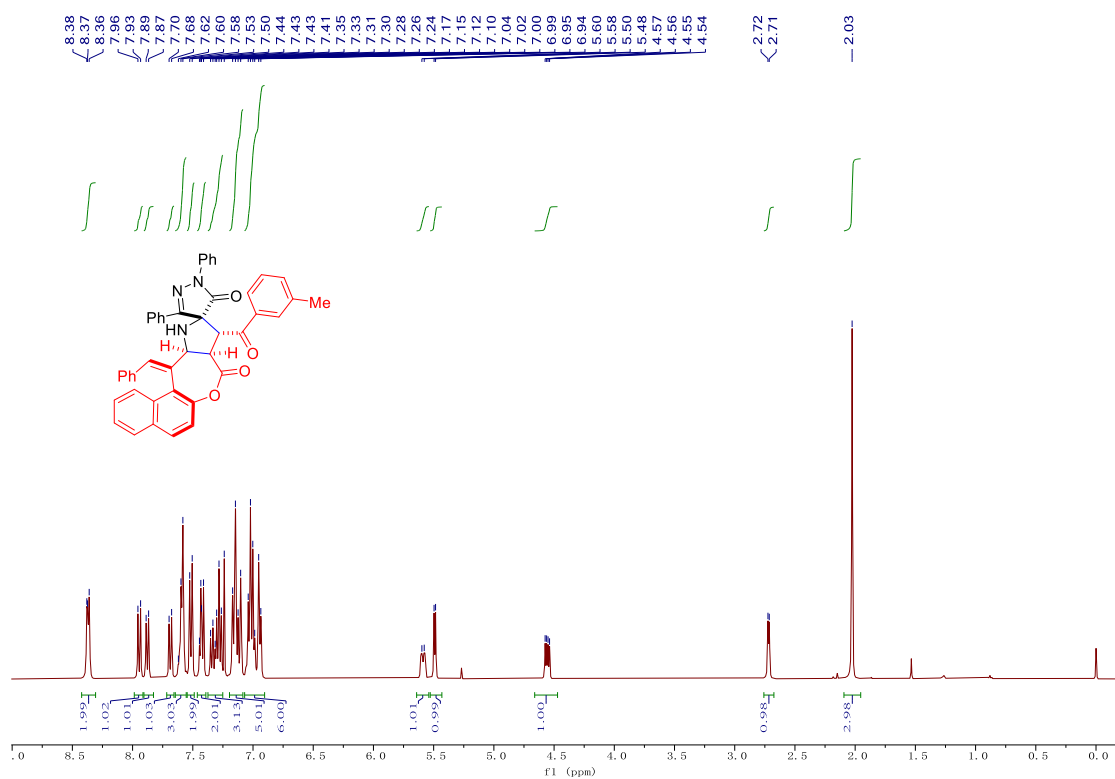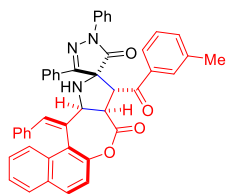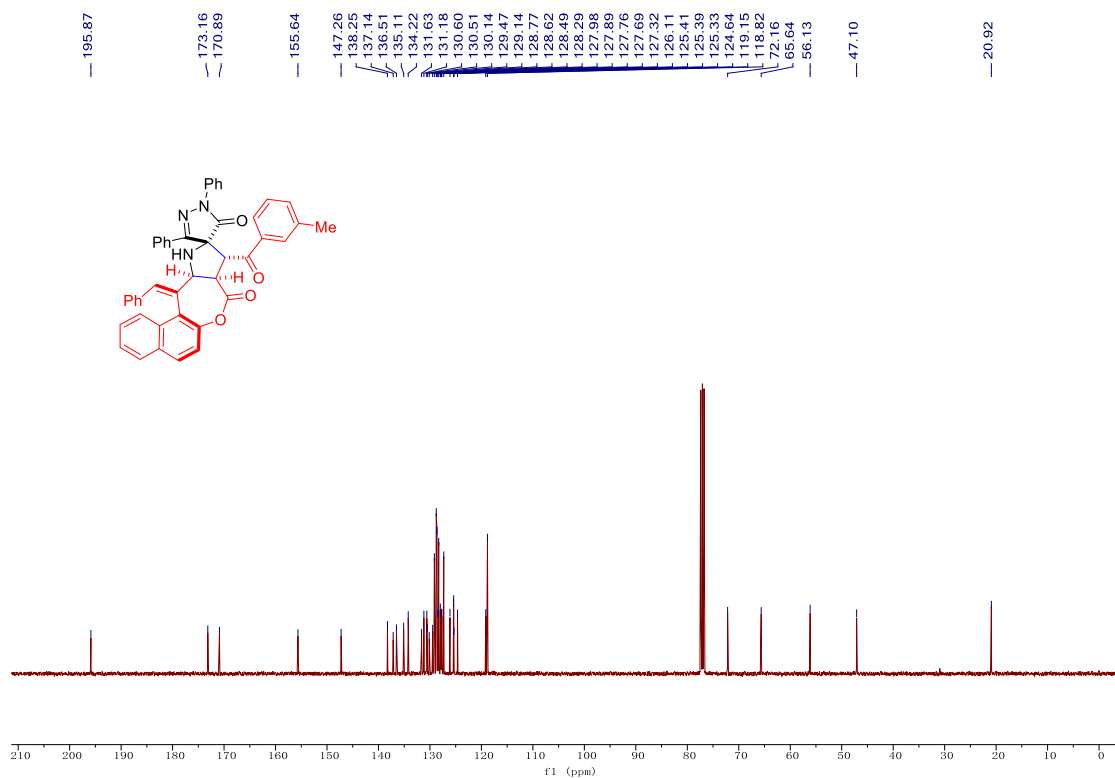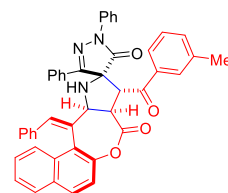

3da

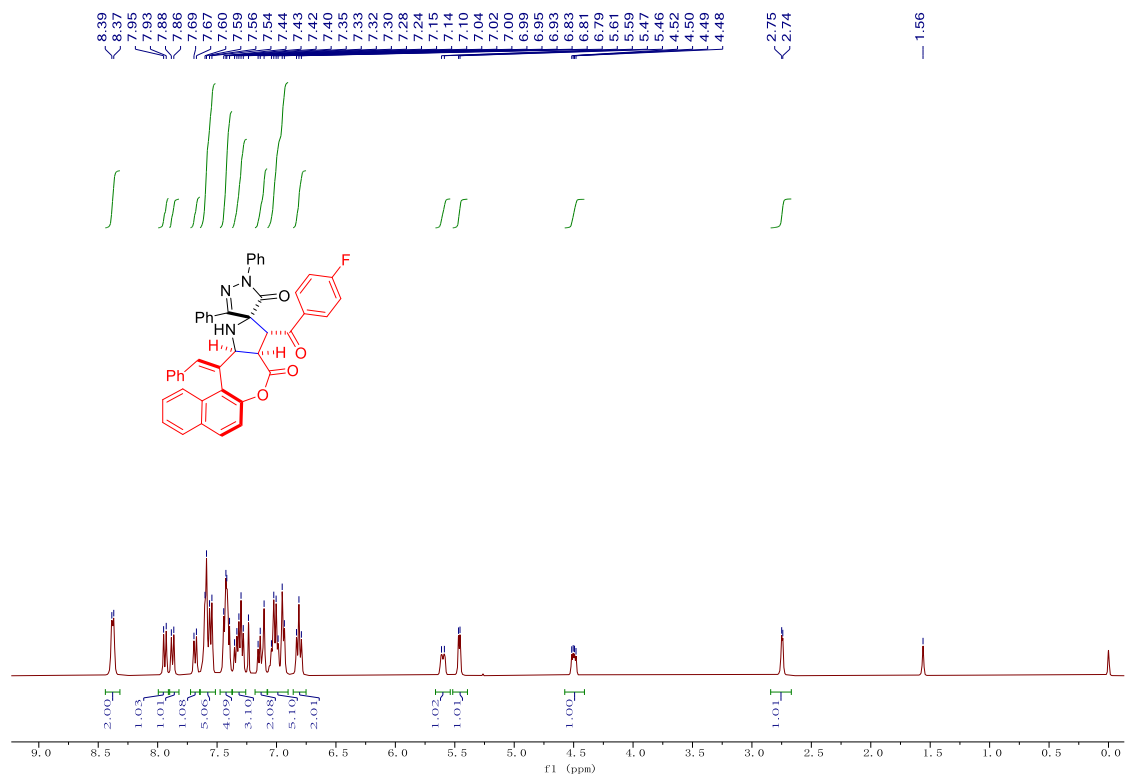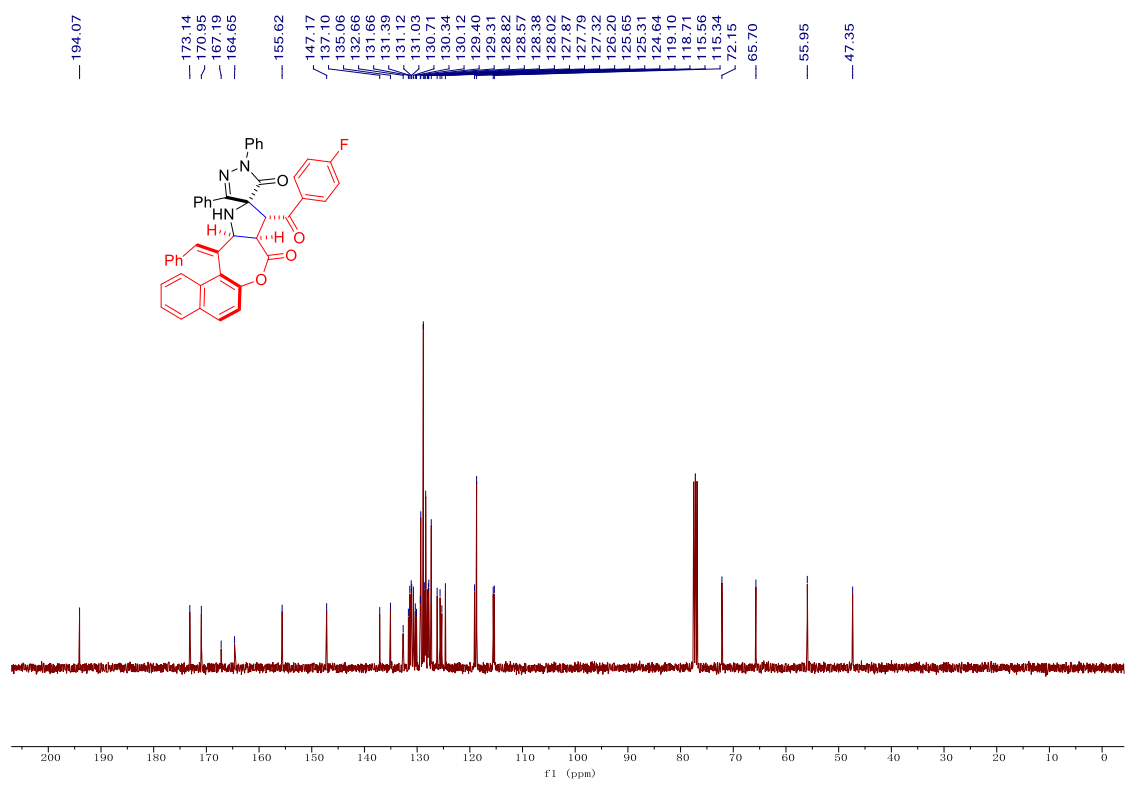



### 3ea

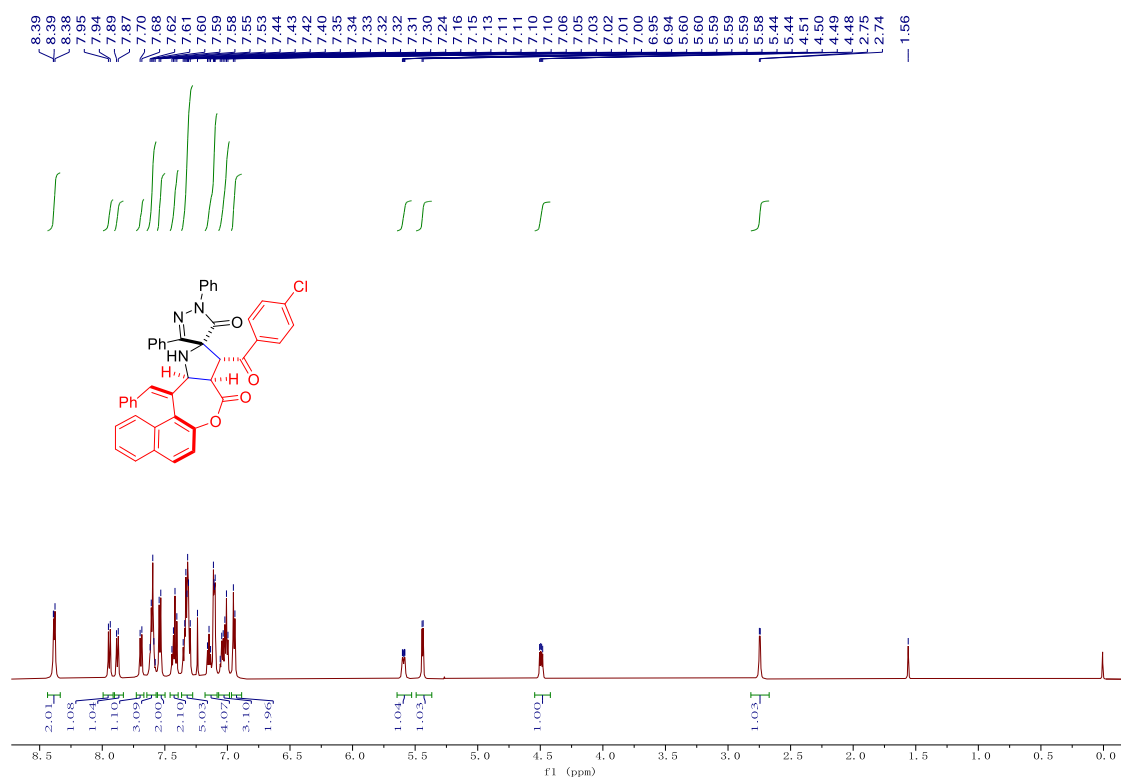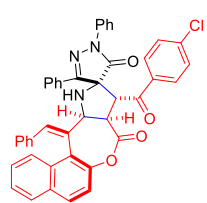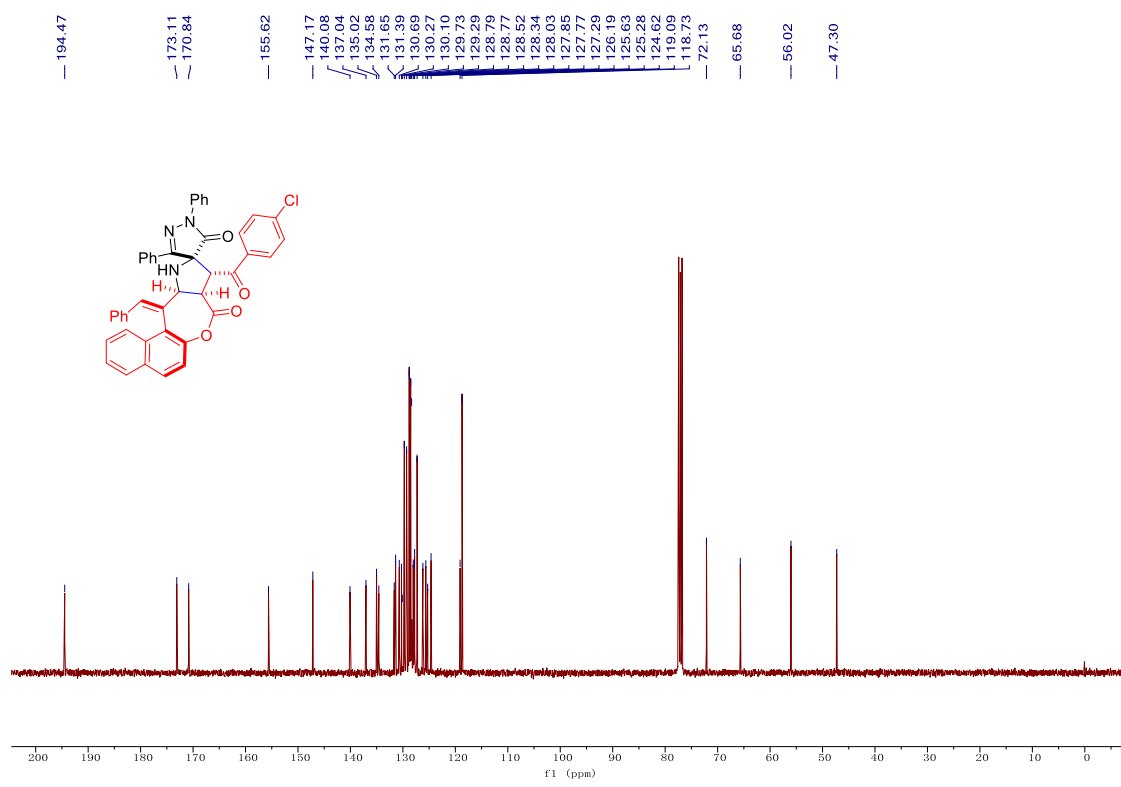

### 3fa

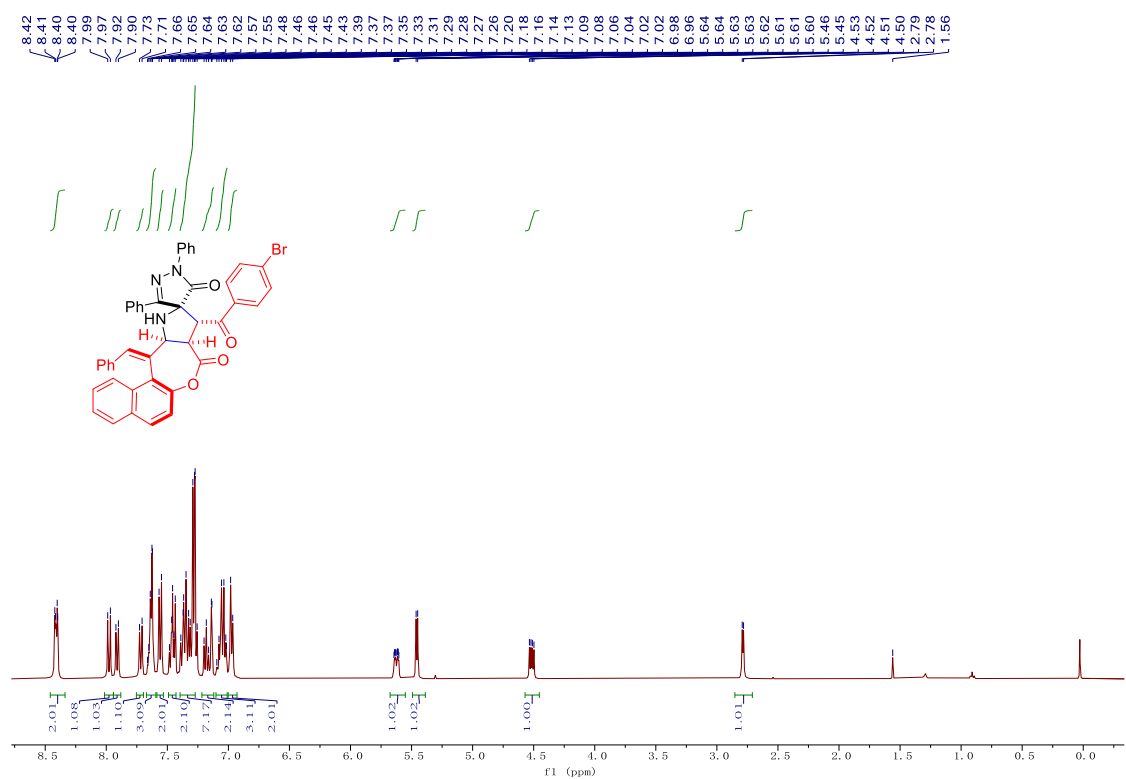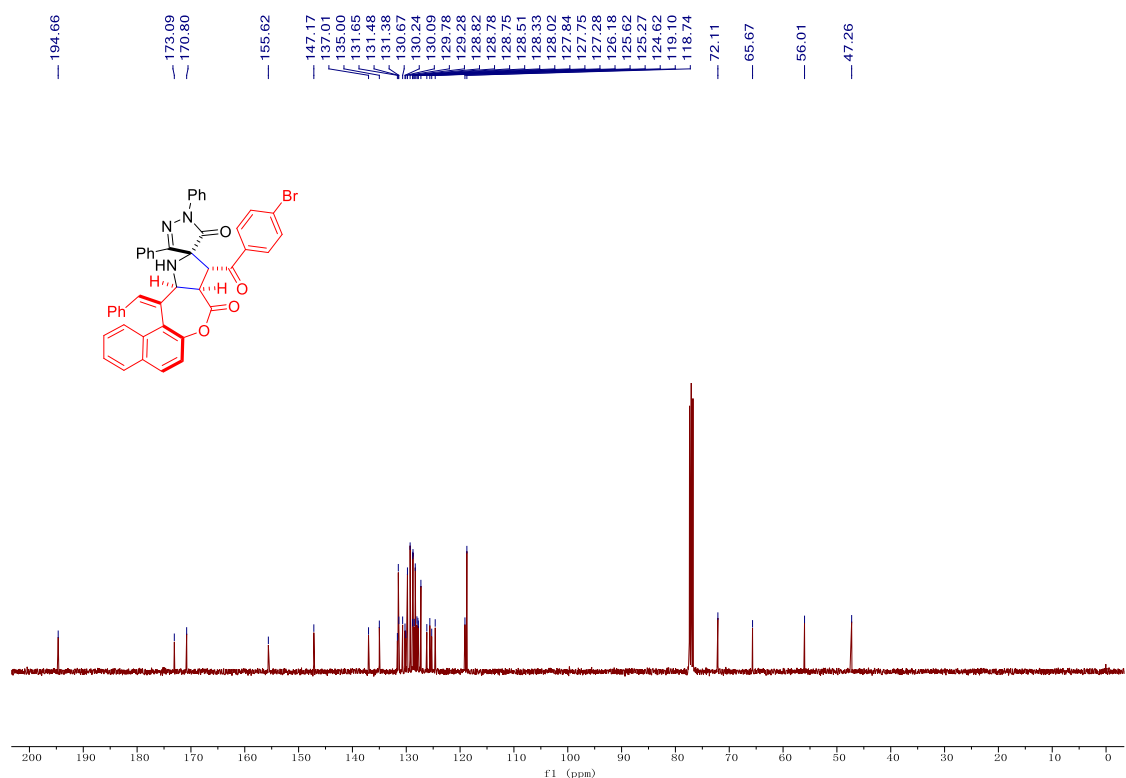

# 3ga

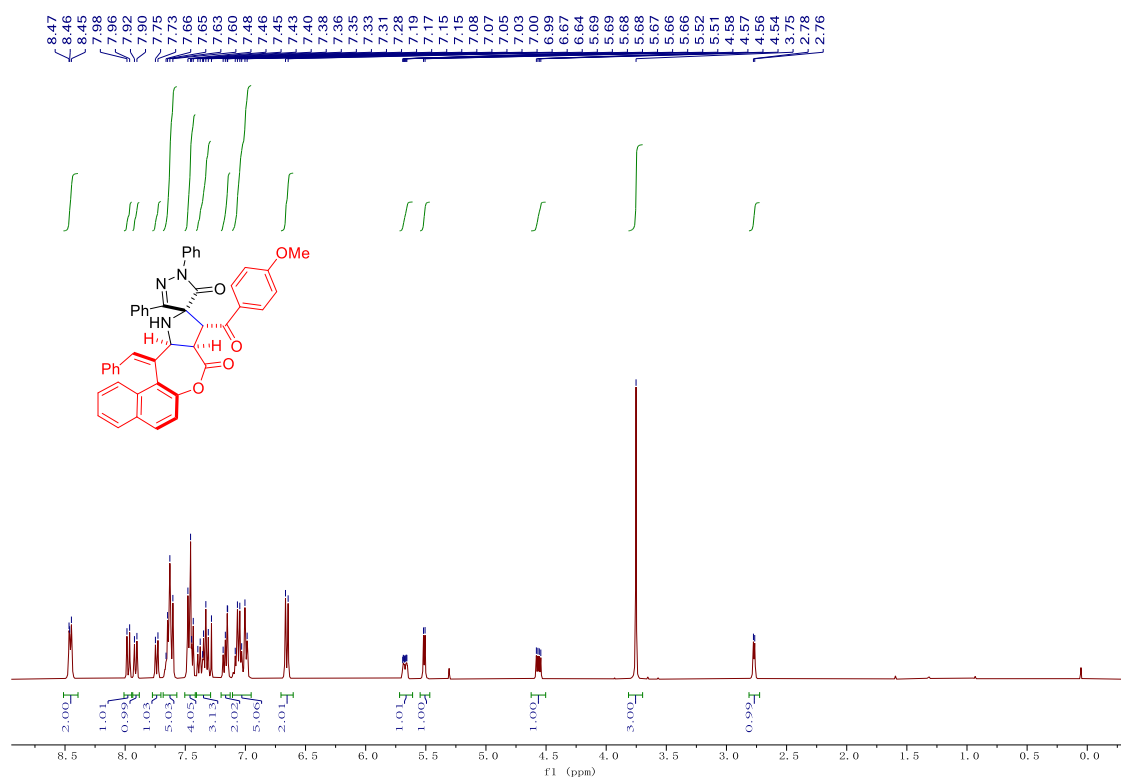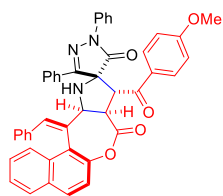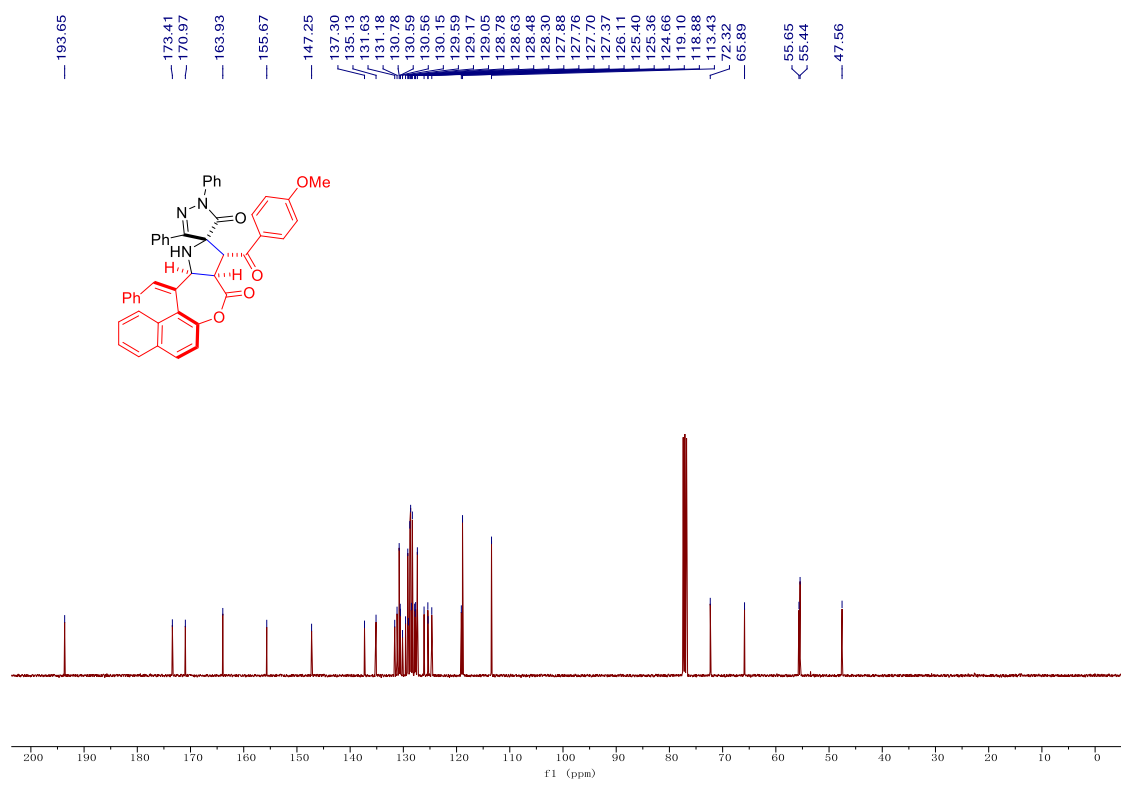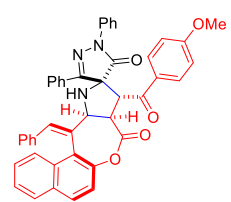

# 3ha

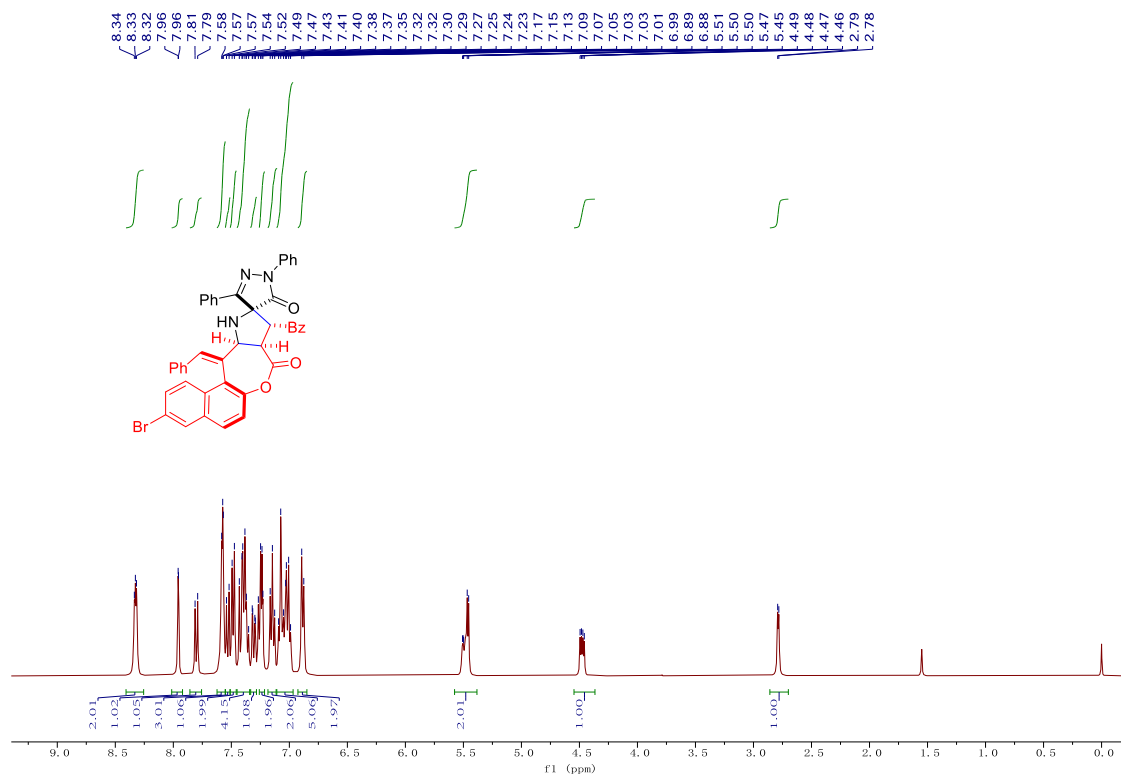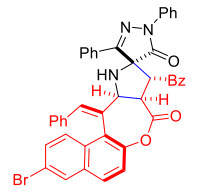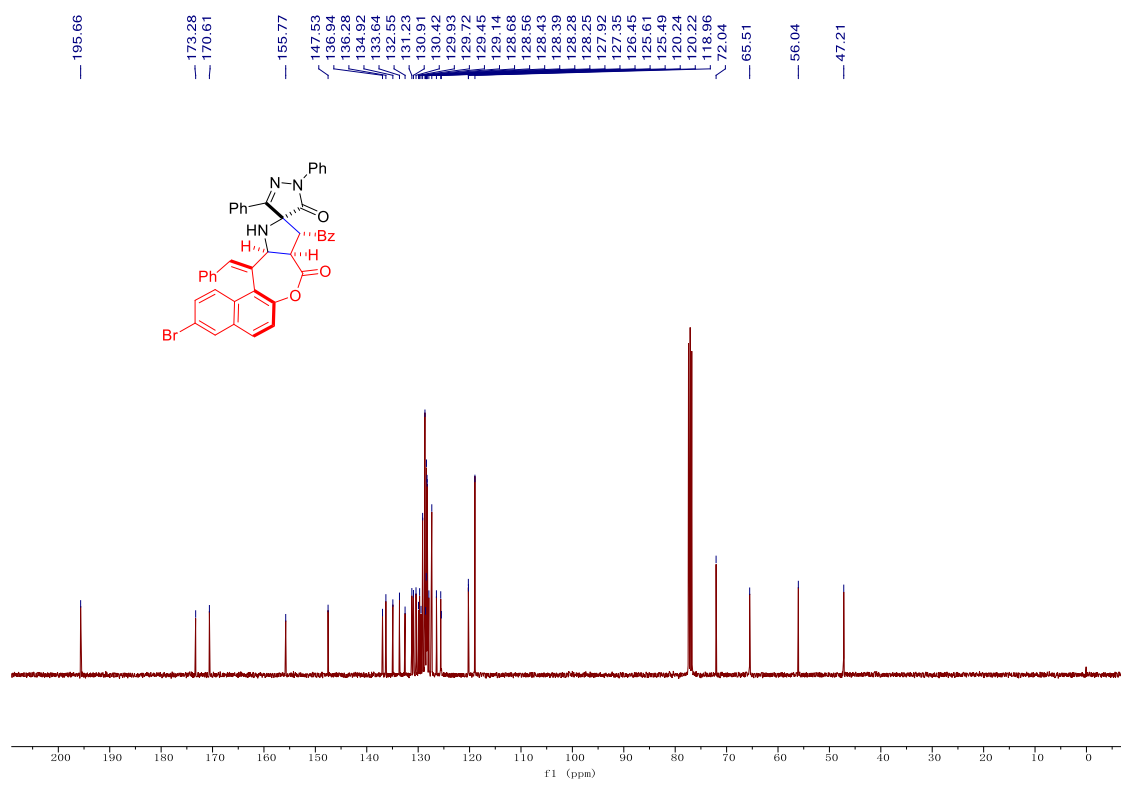

**3ia**

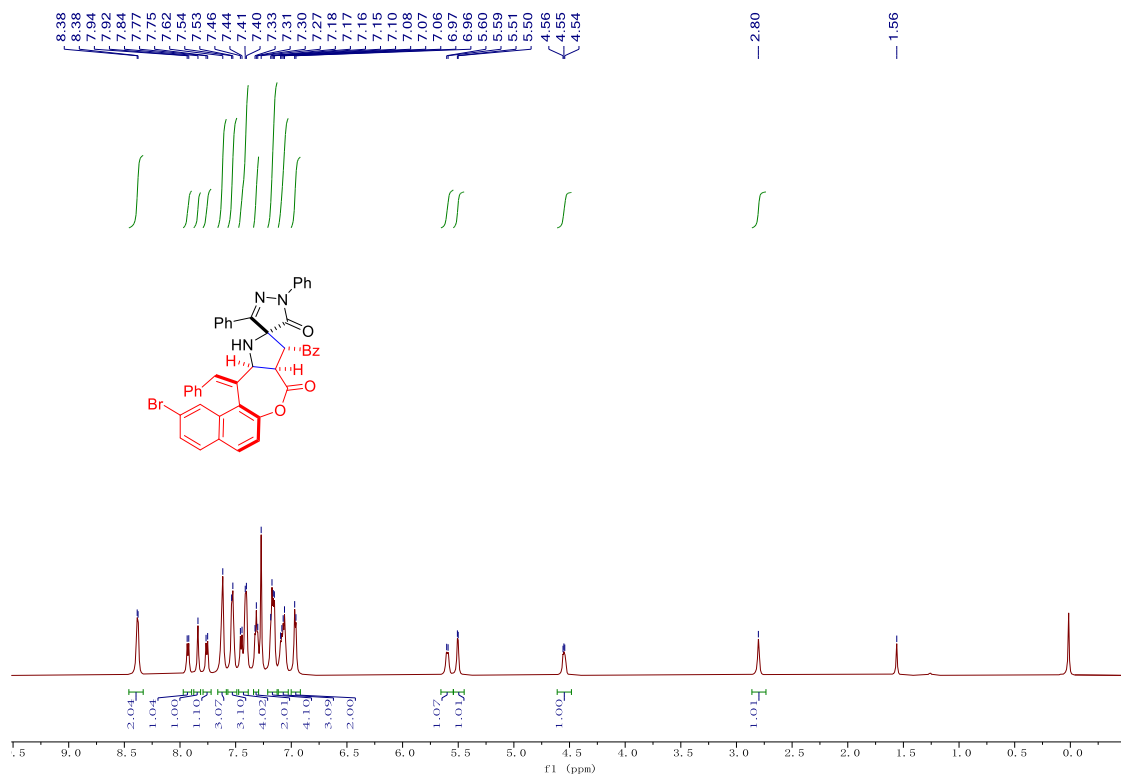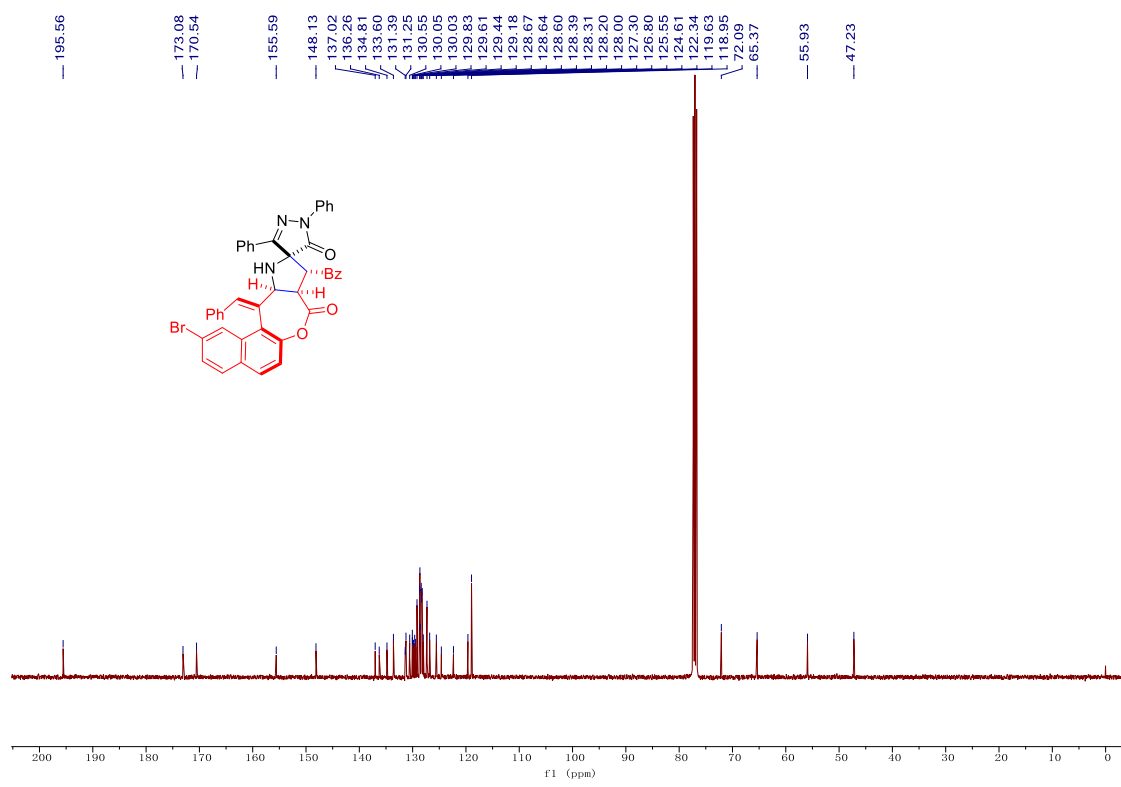

# 3ja

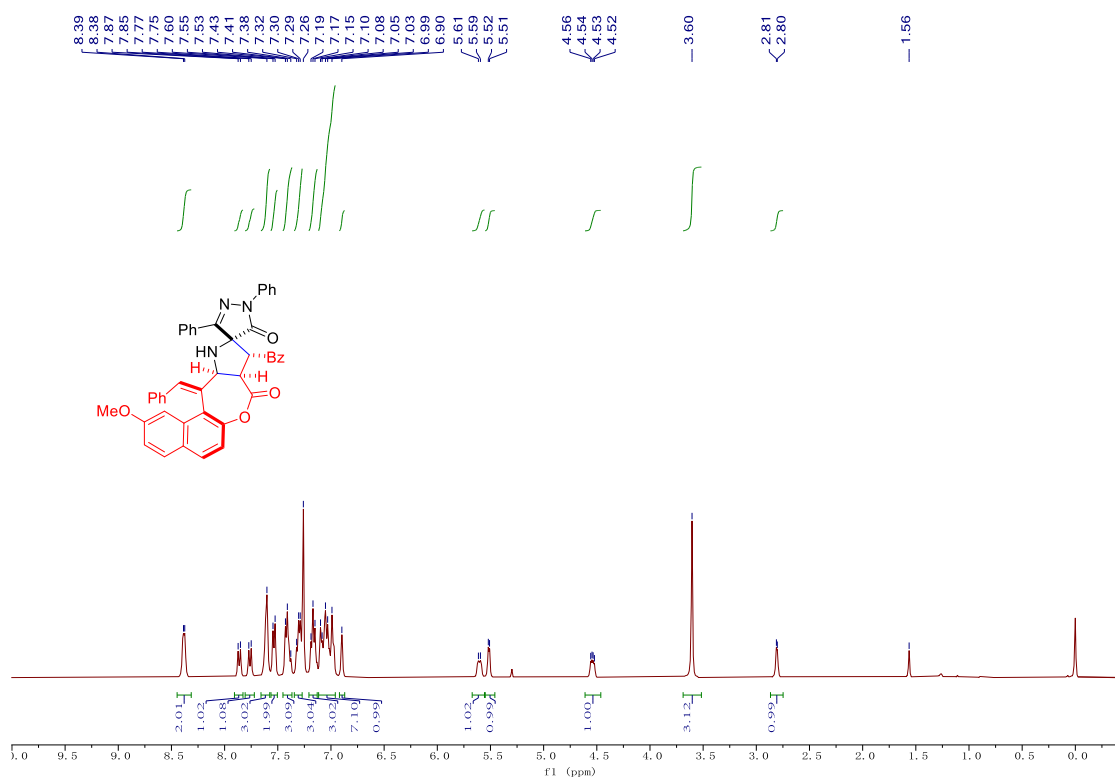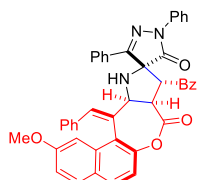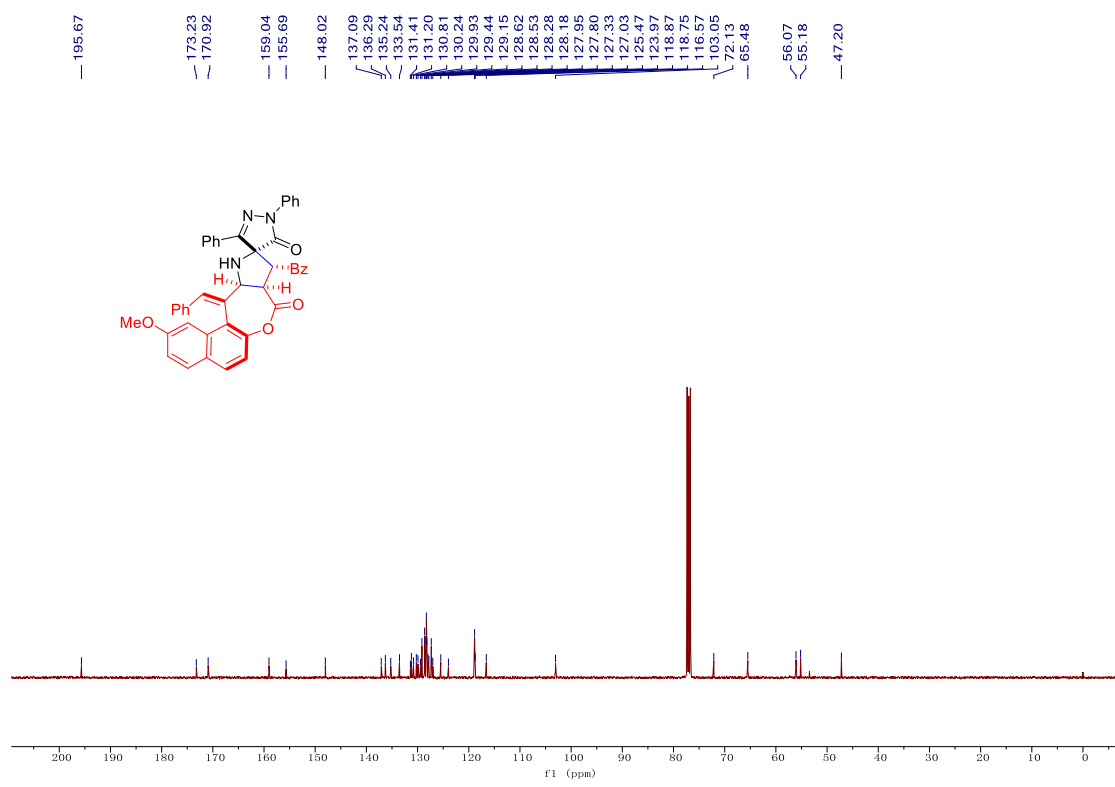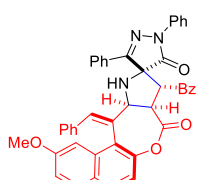

# 5aa

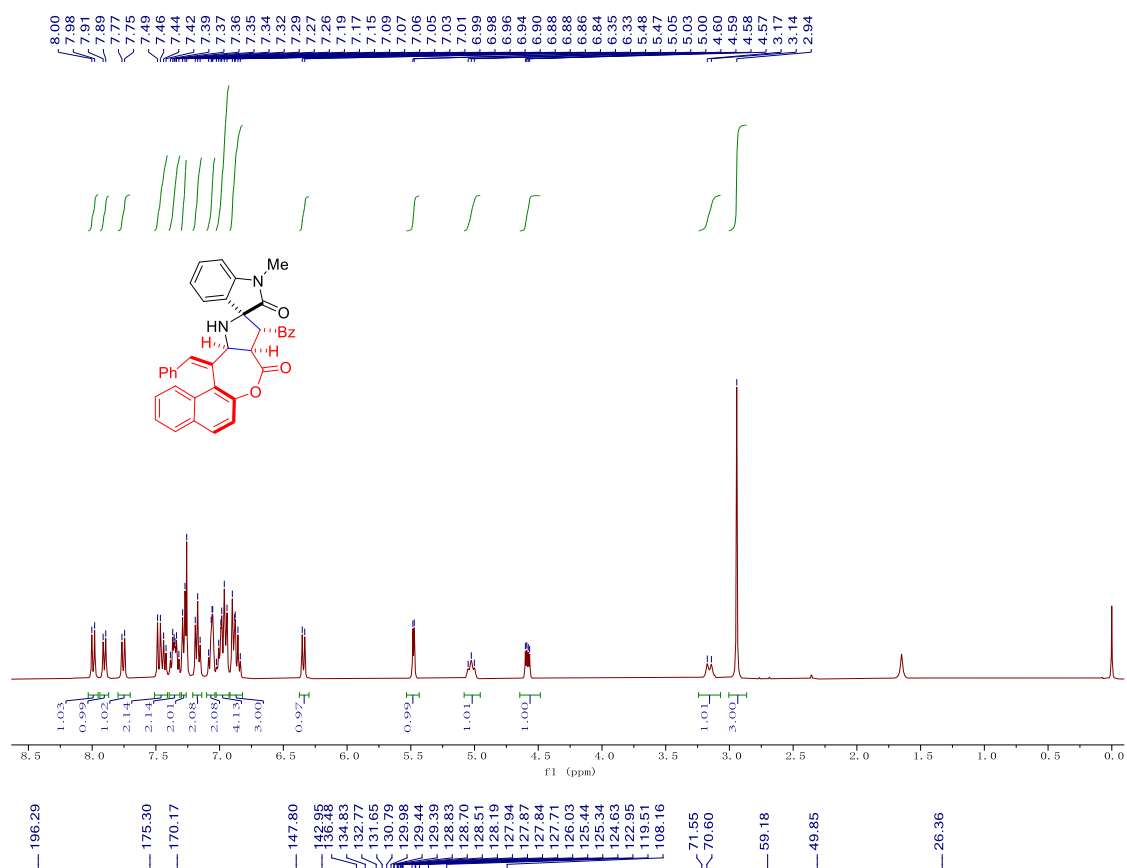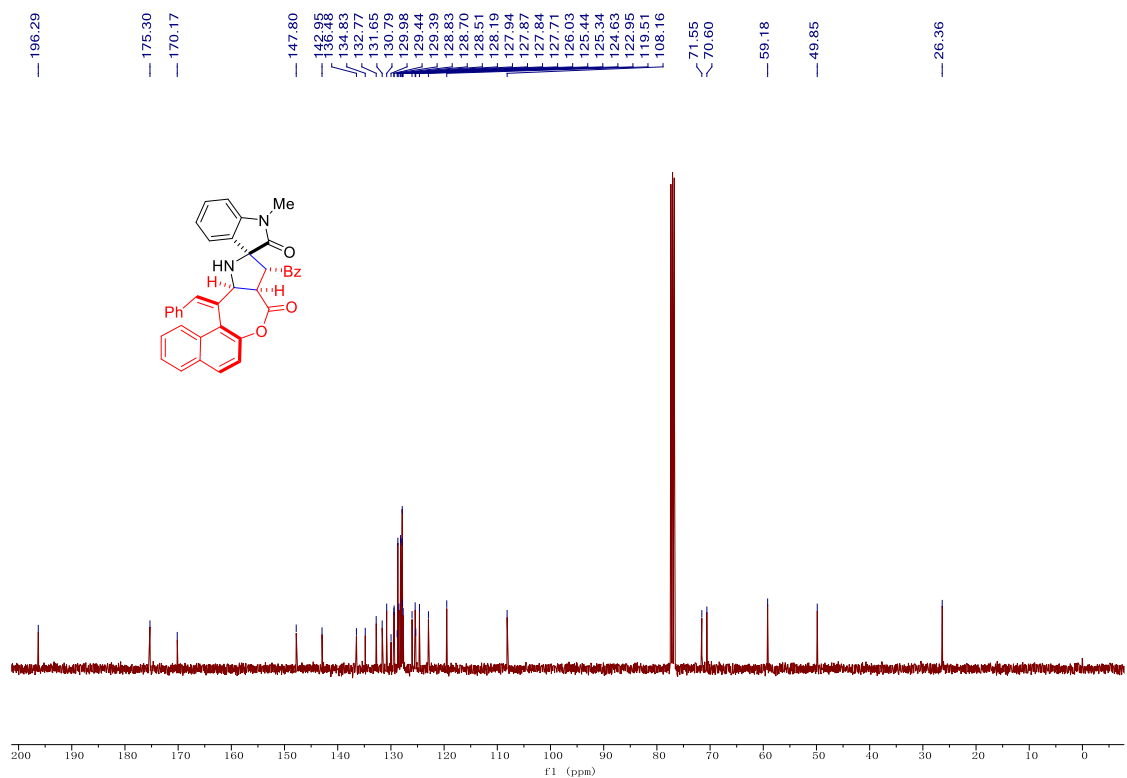

# 5ab

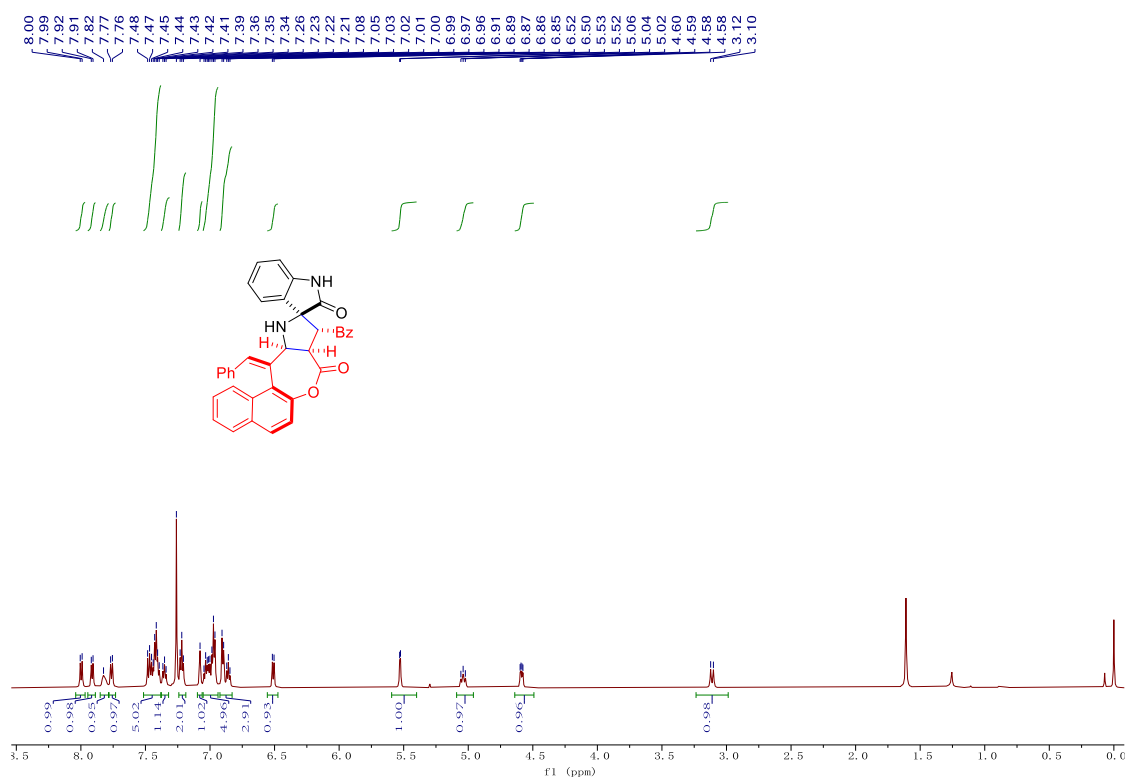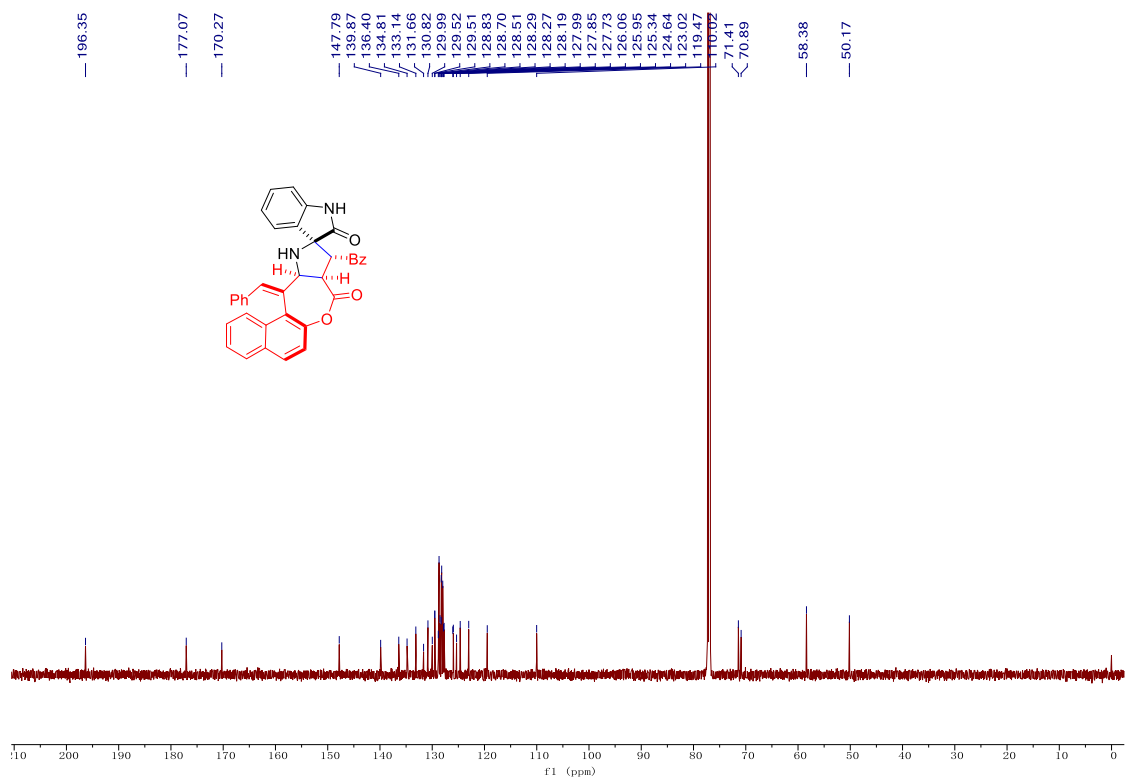



# 5ac

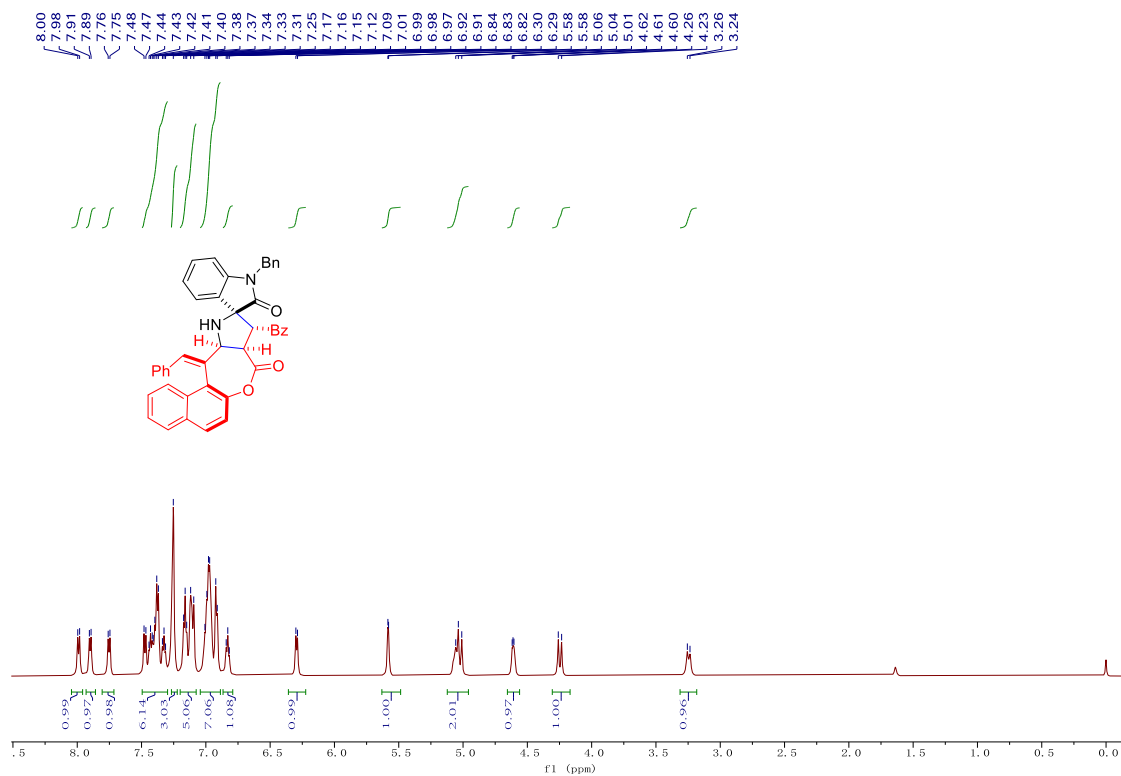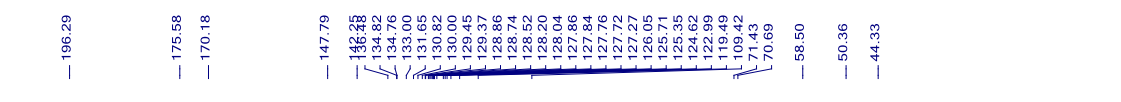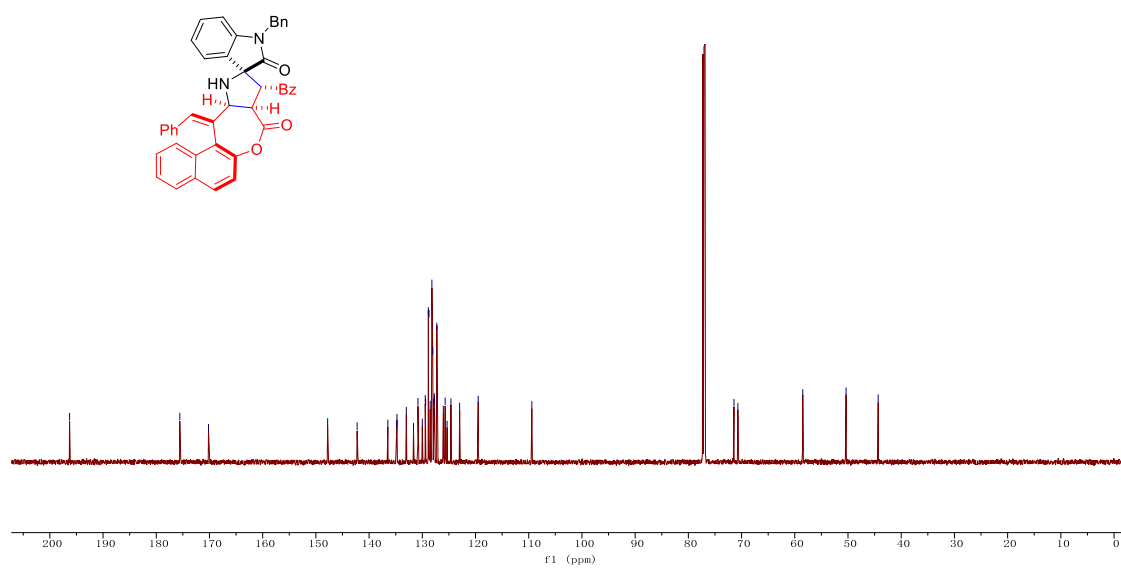

# 5ad

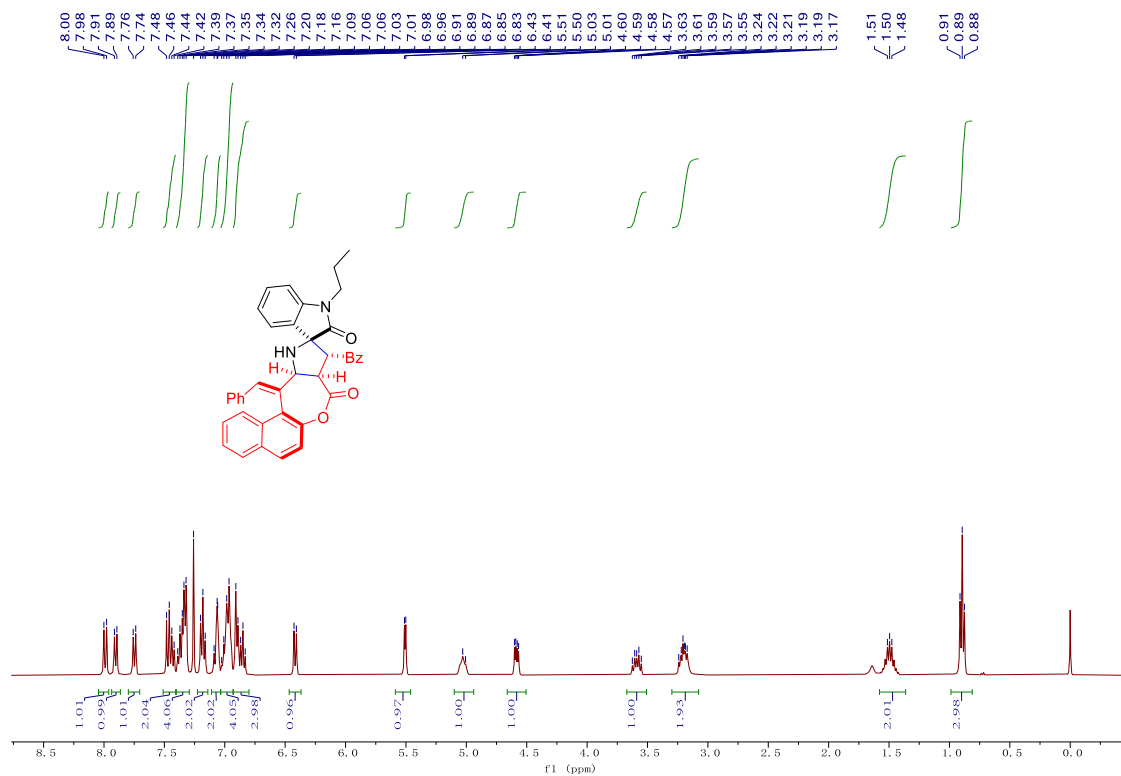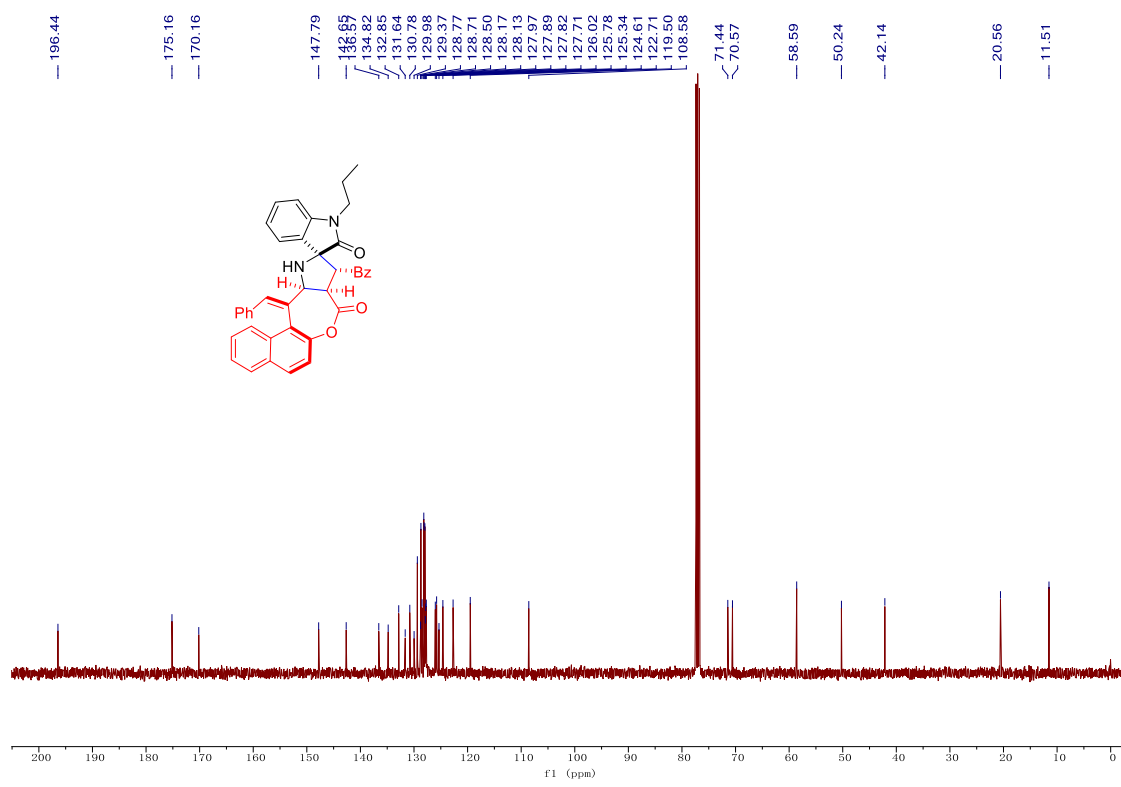



# 5af

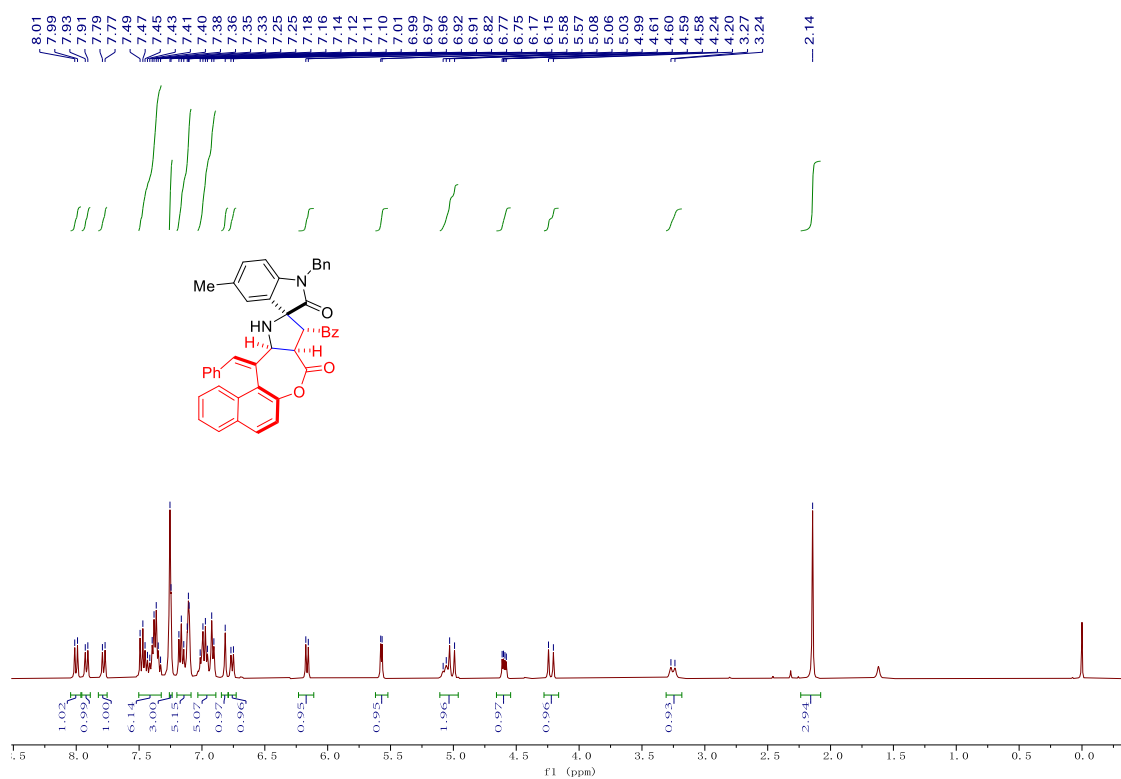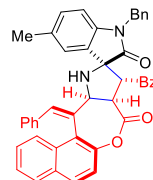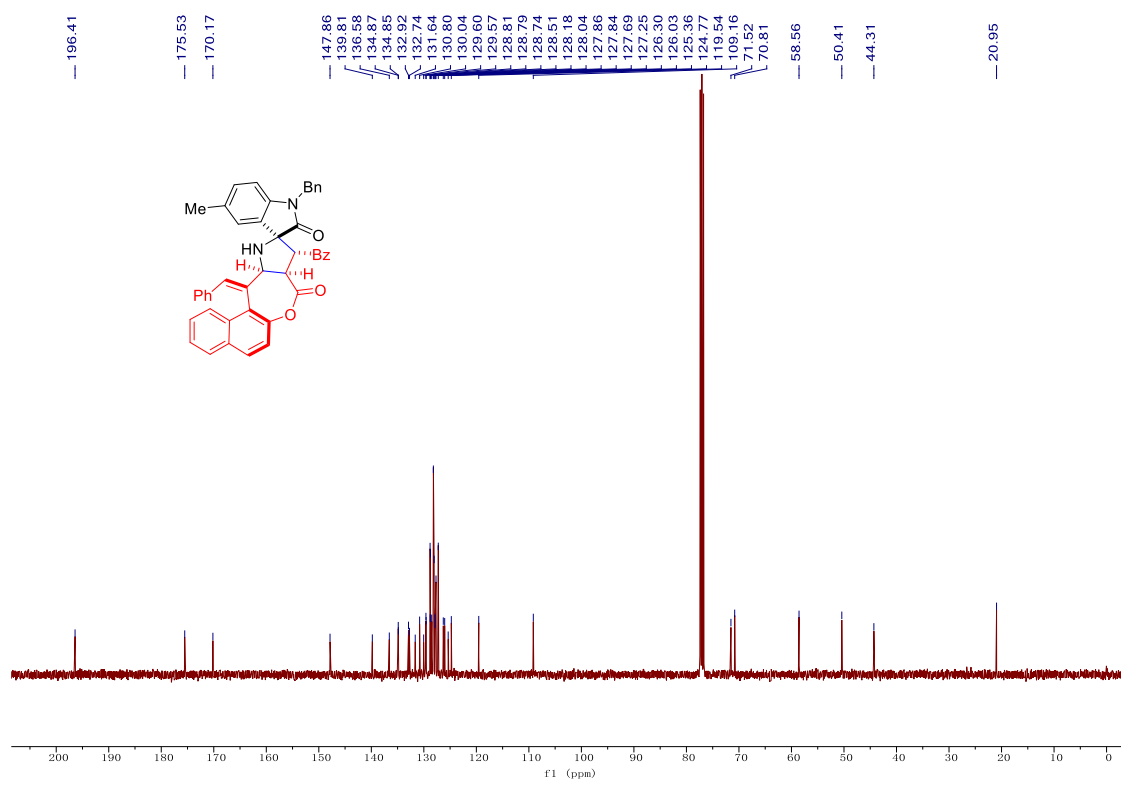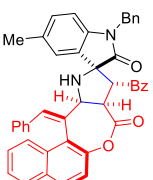

5ba

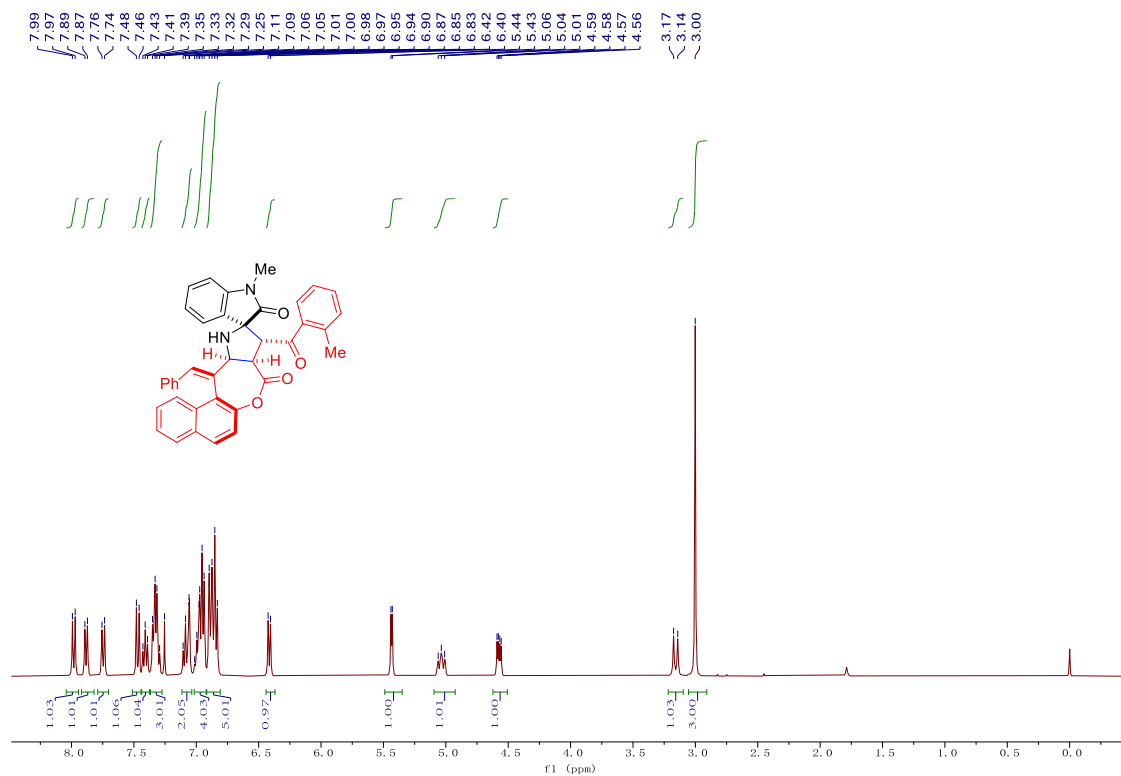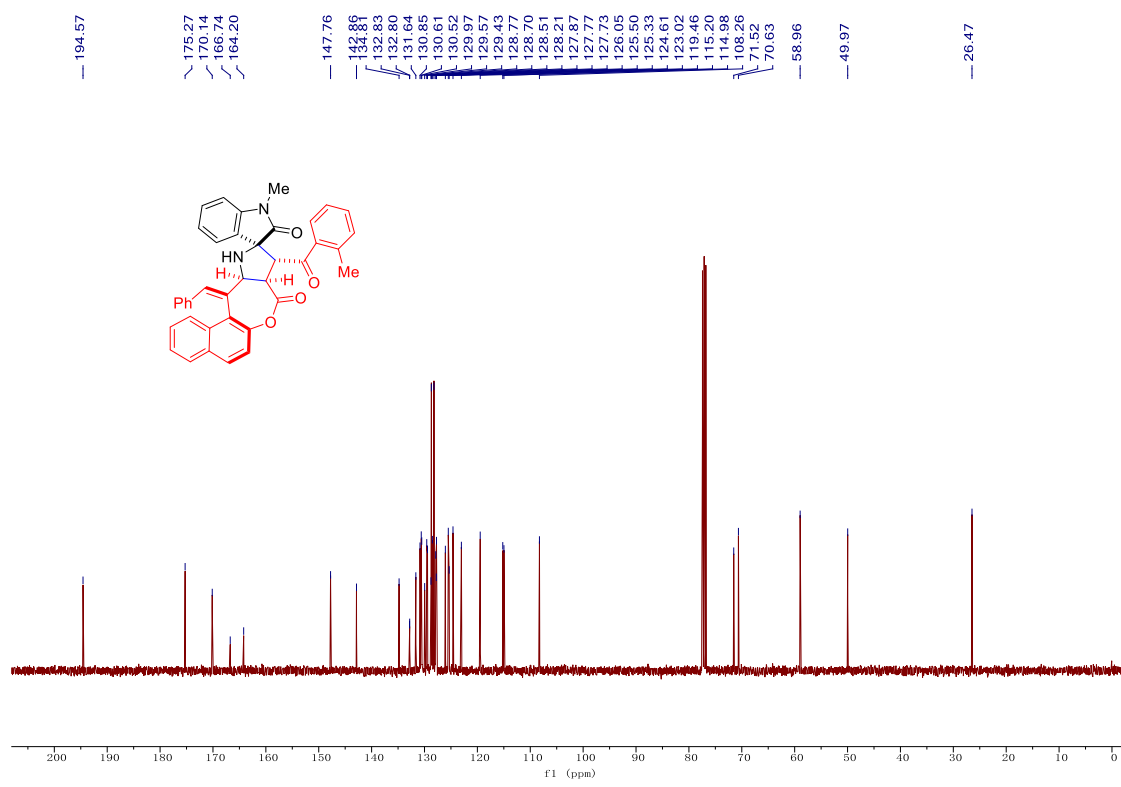

# 5ca

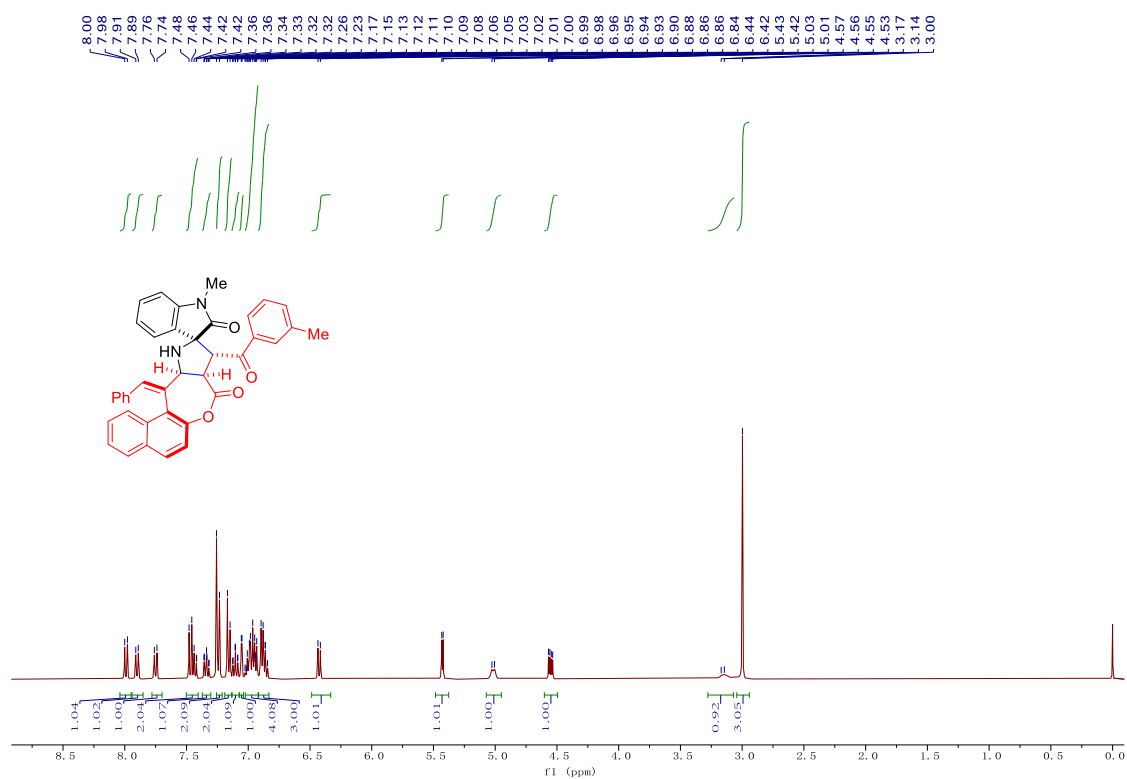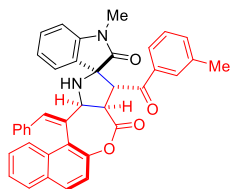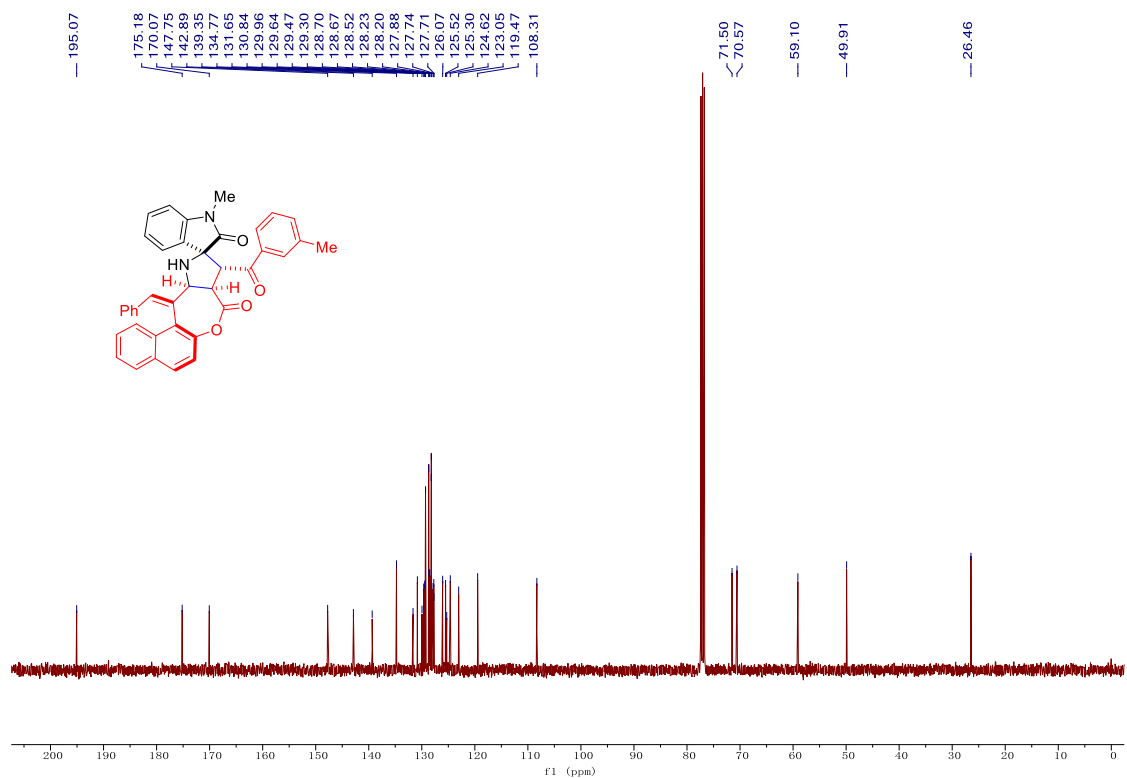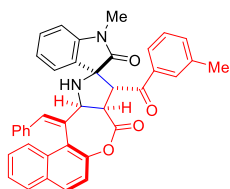

# 5da

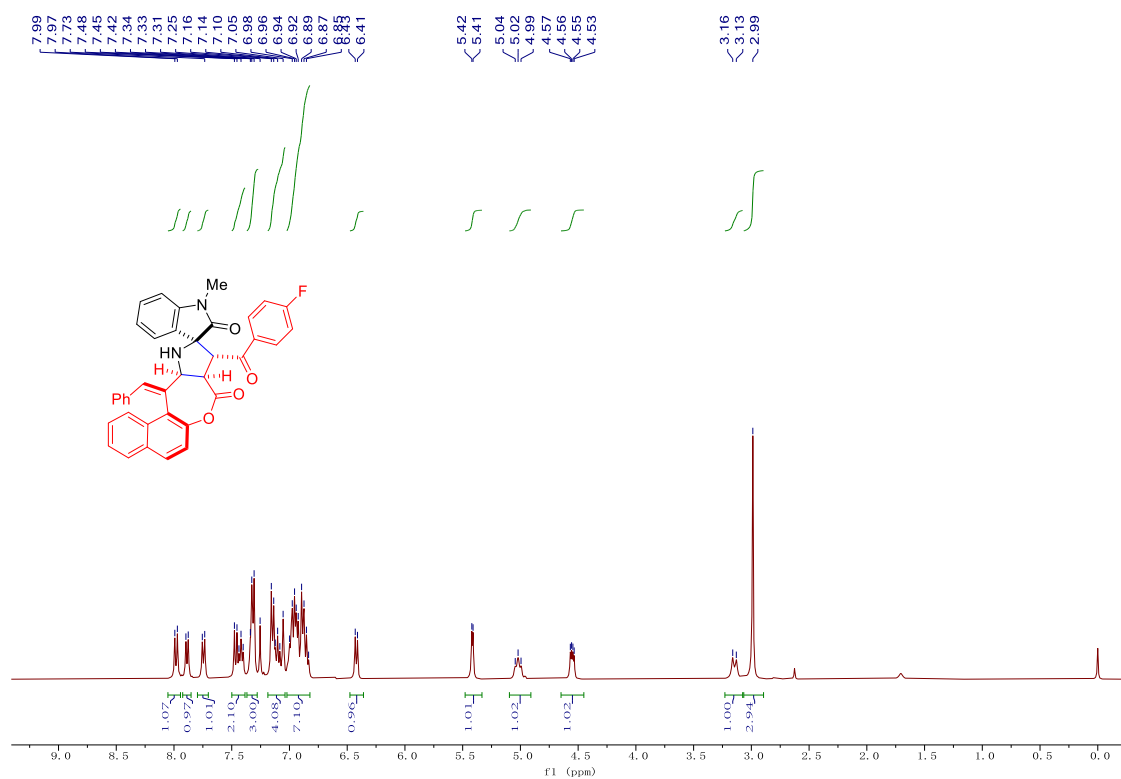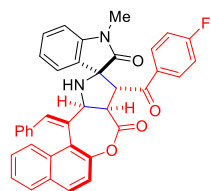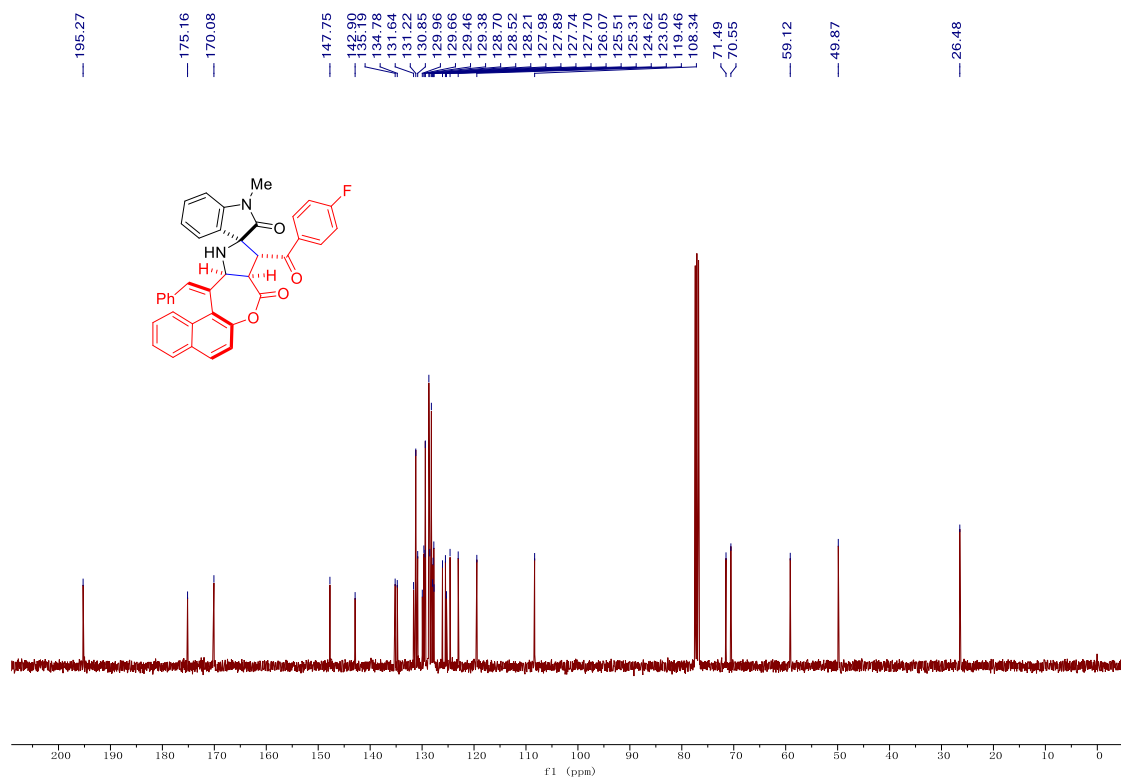

# 5ea

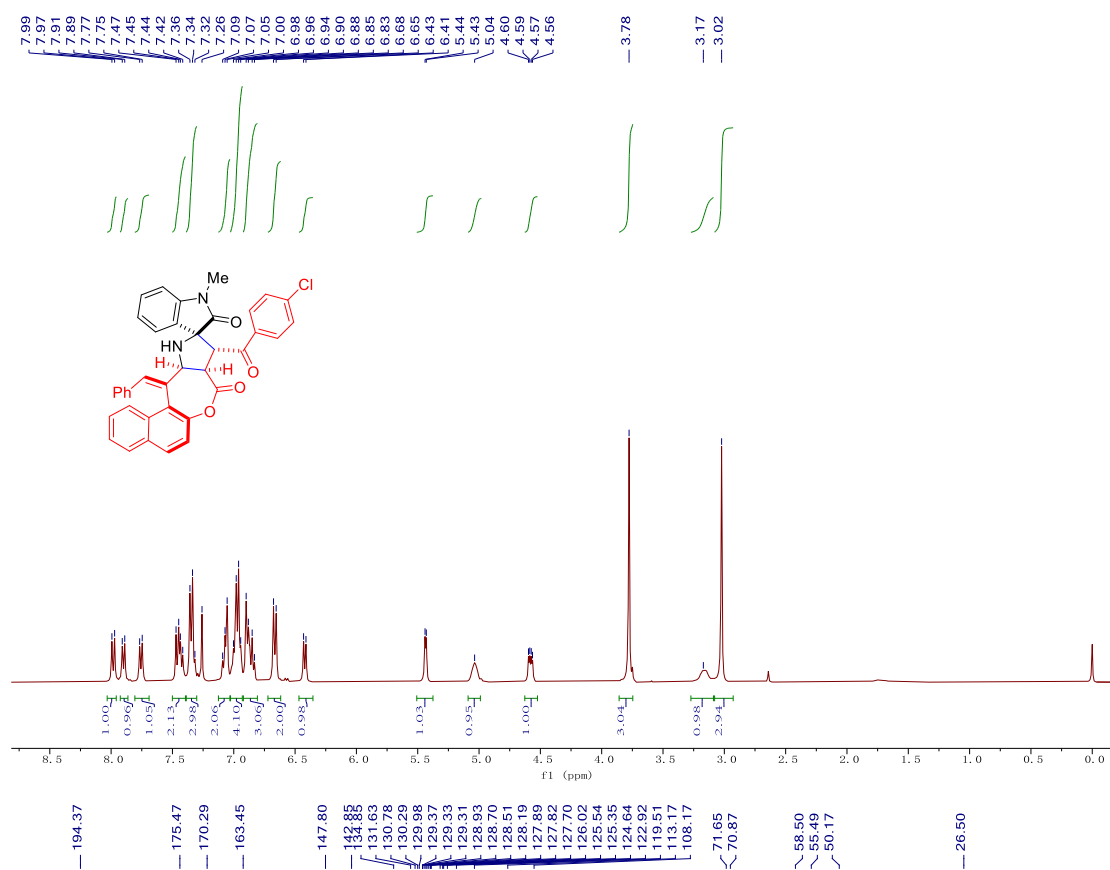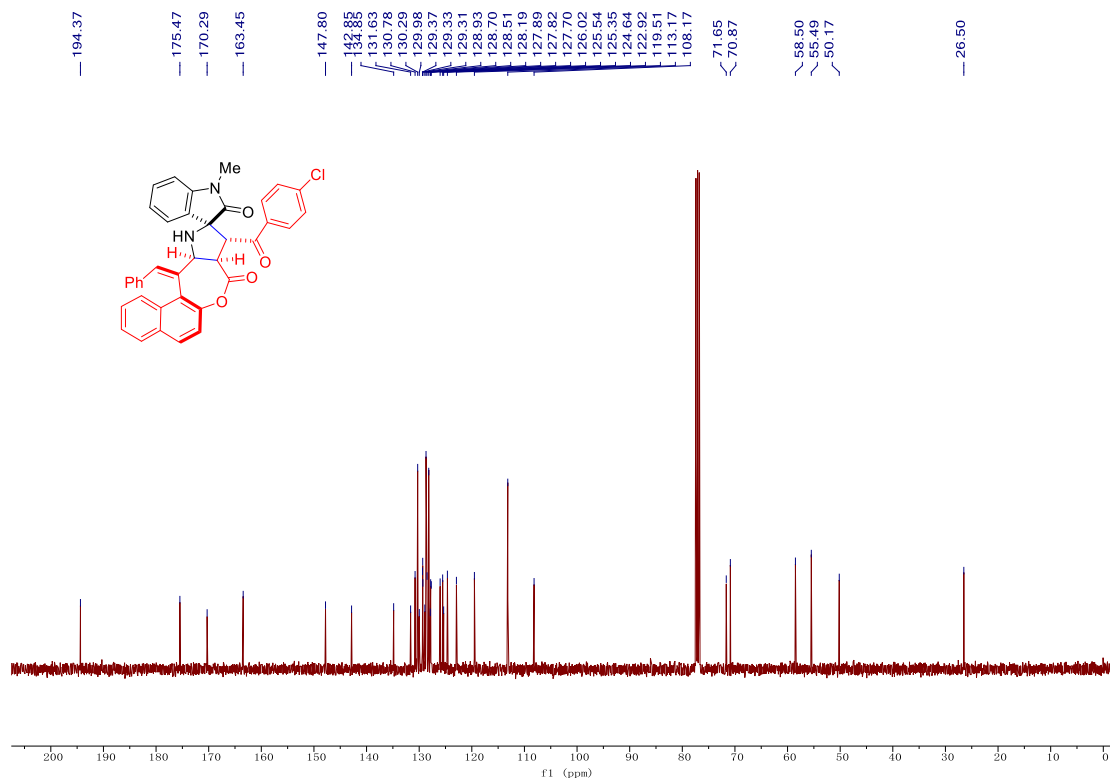



5fa

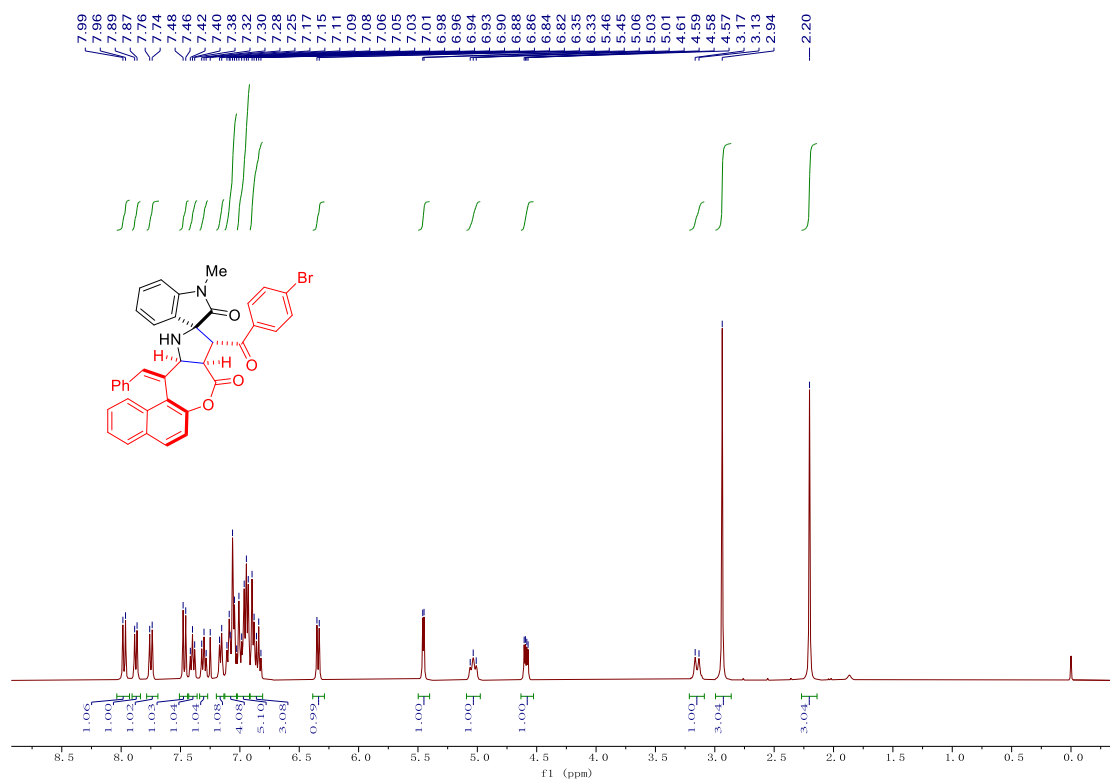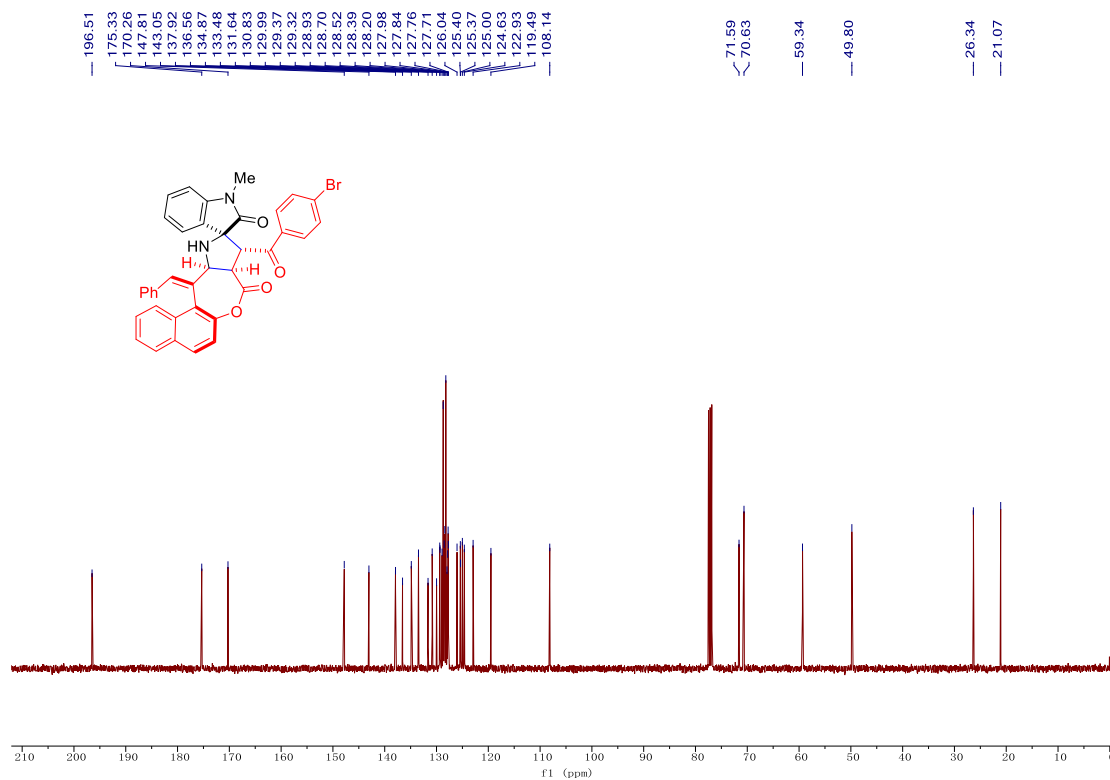

5ga

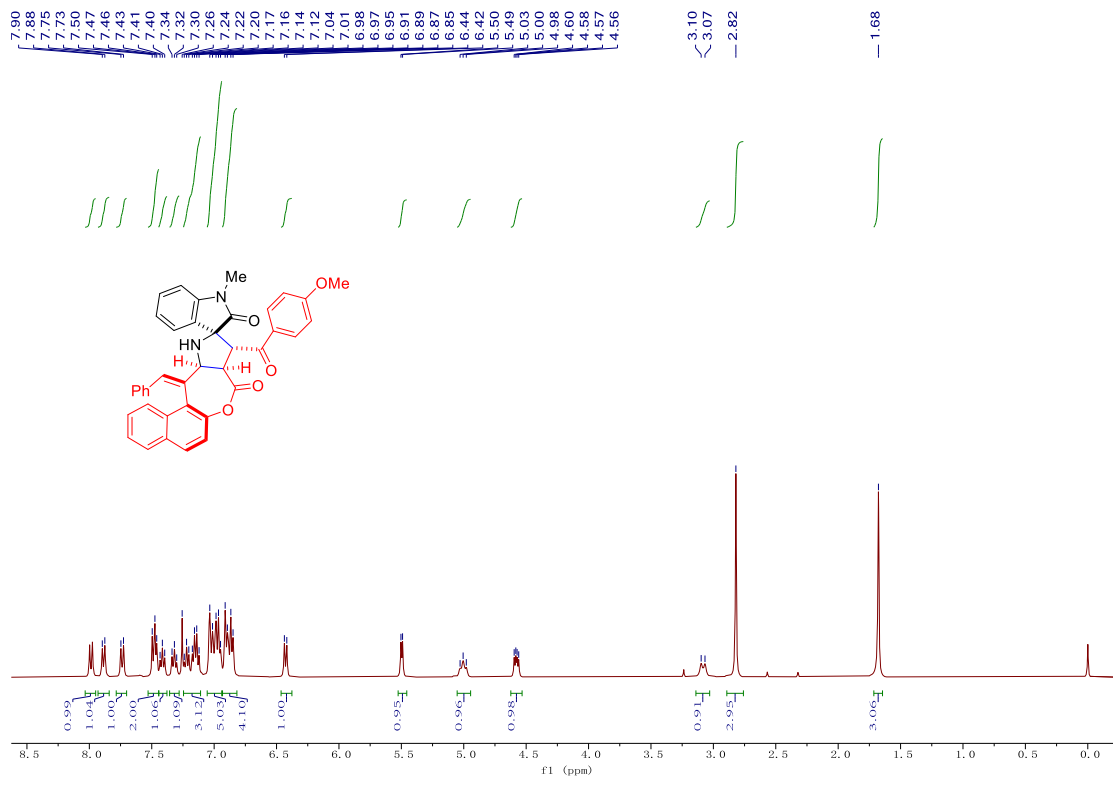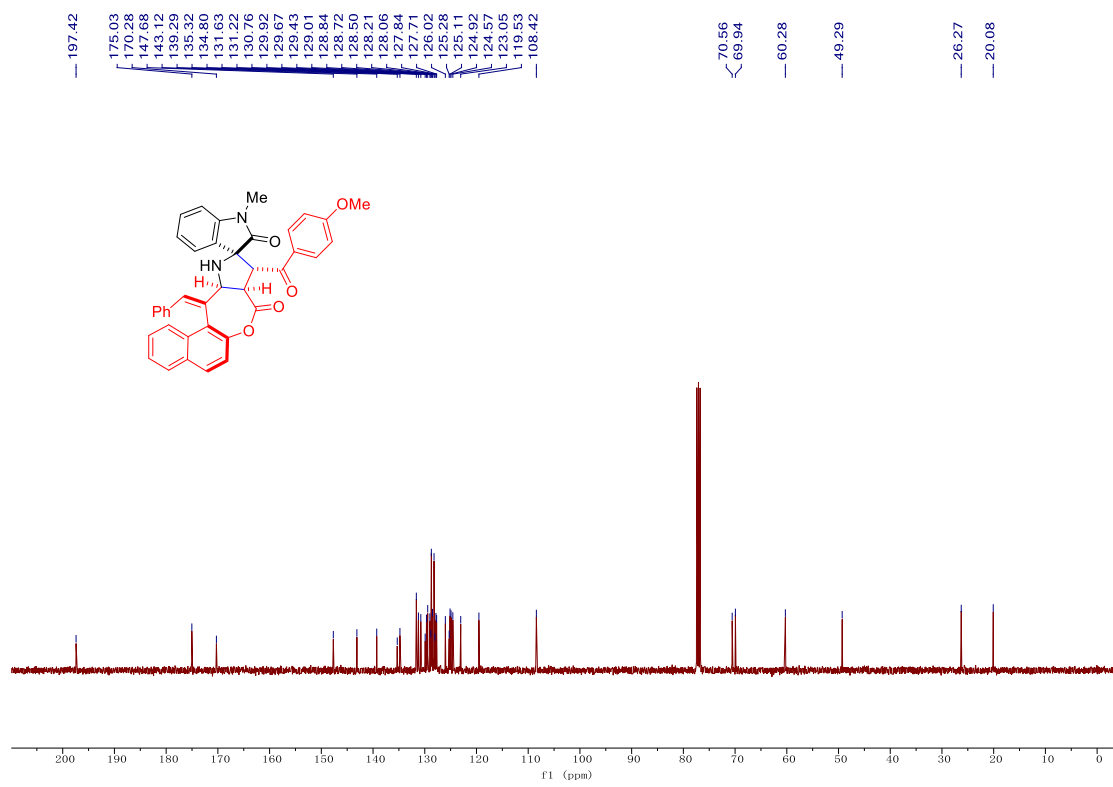

5ha

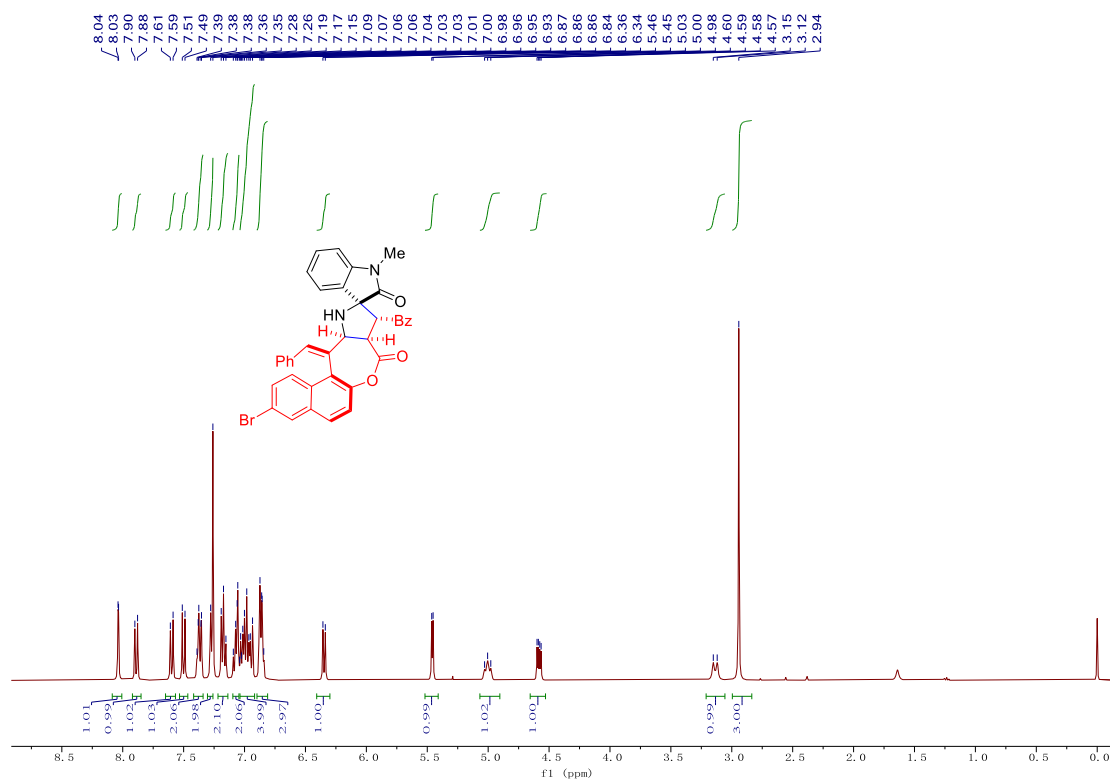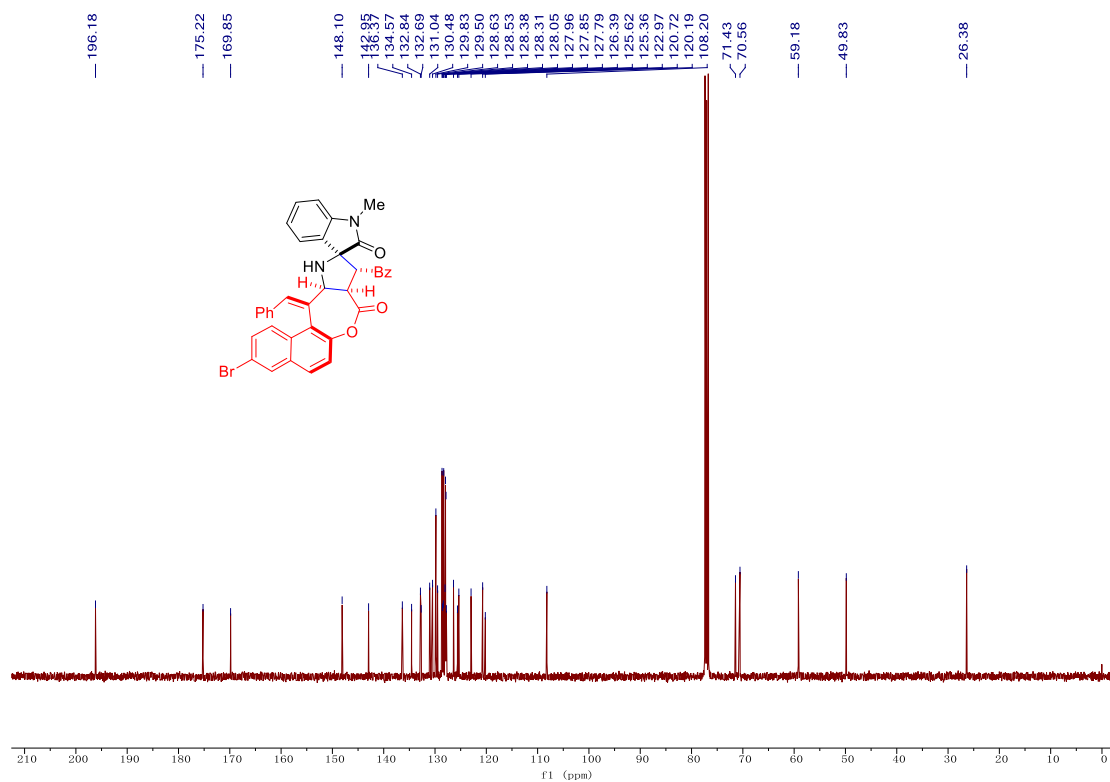

5ia

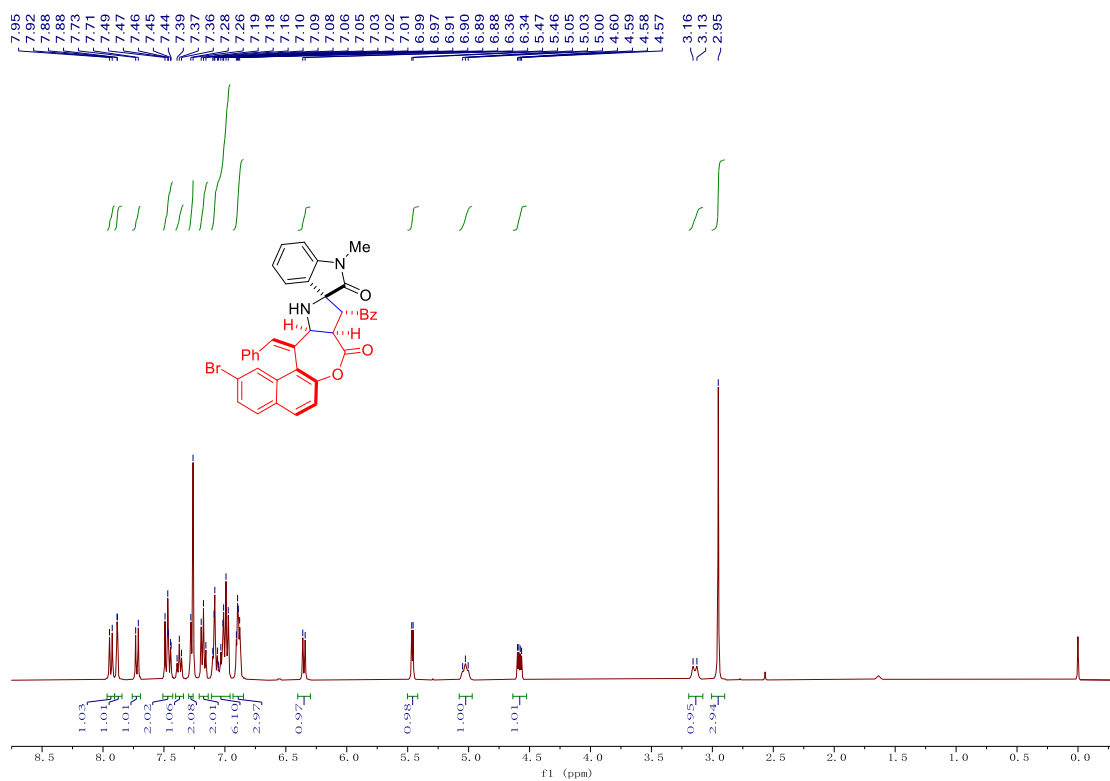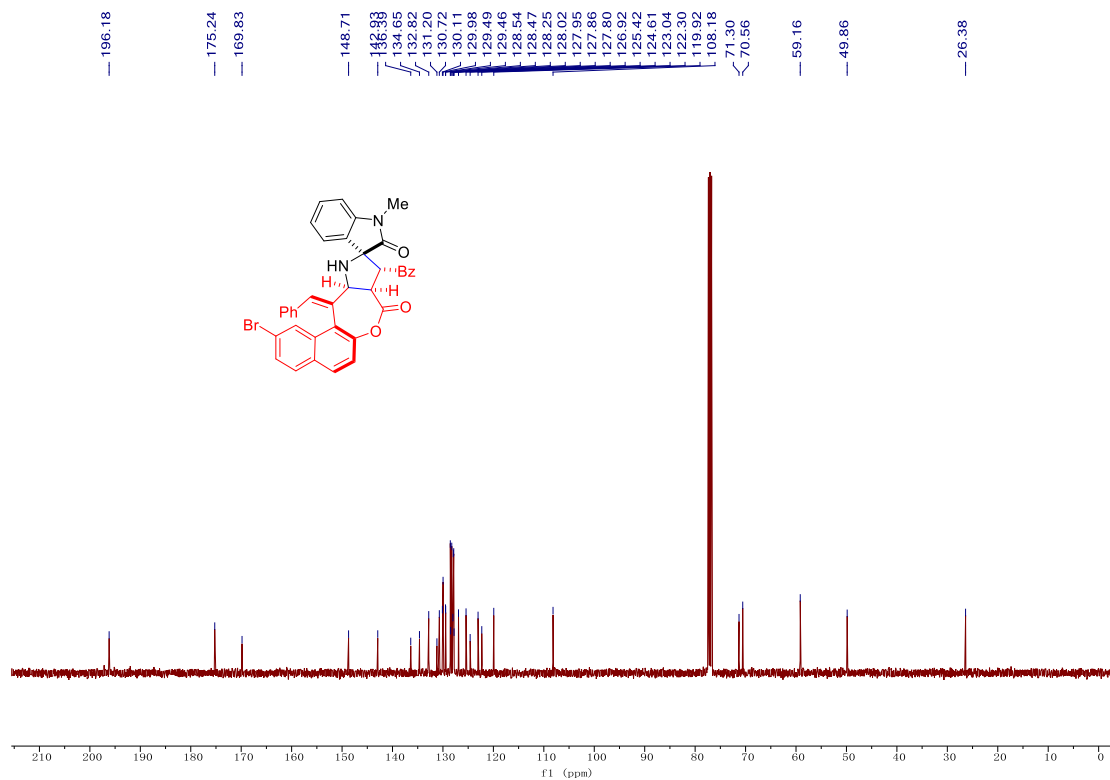

# 5ja

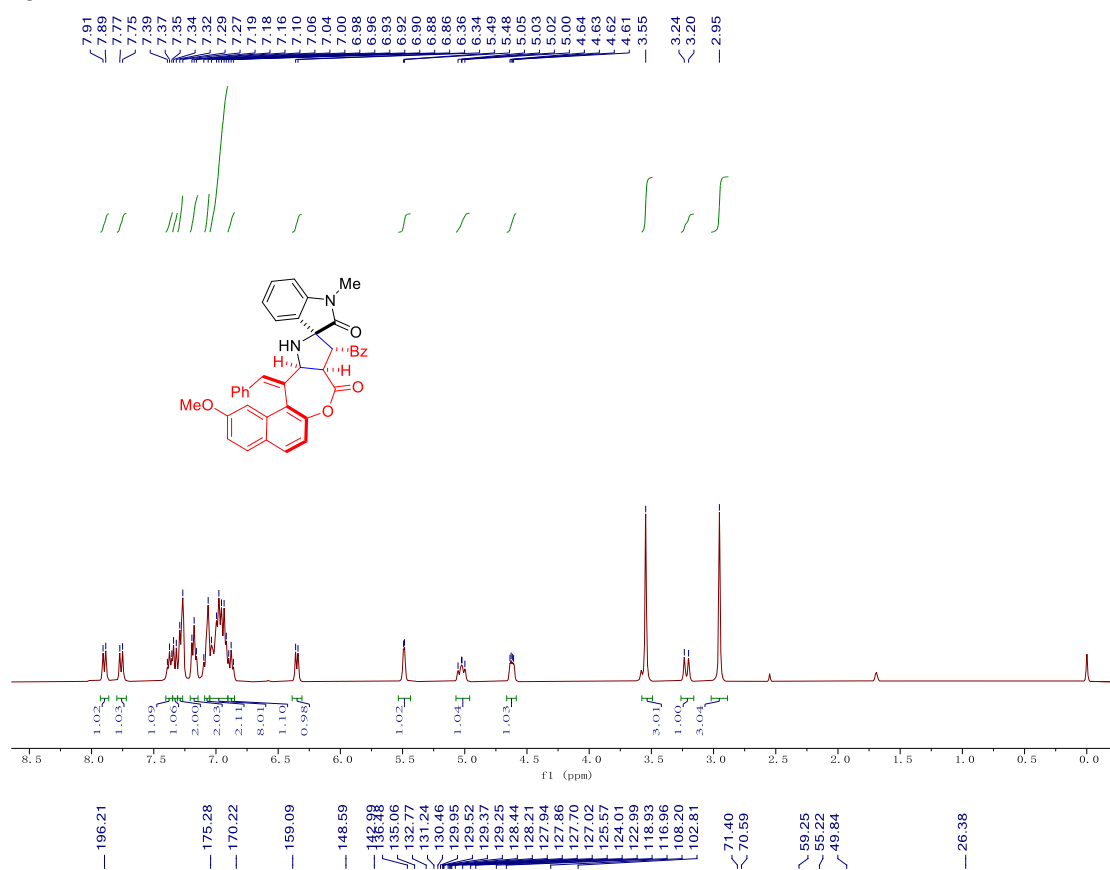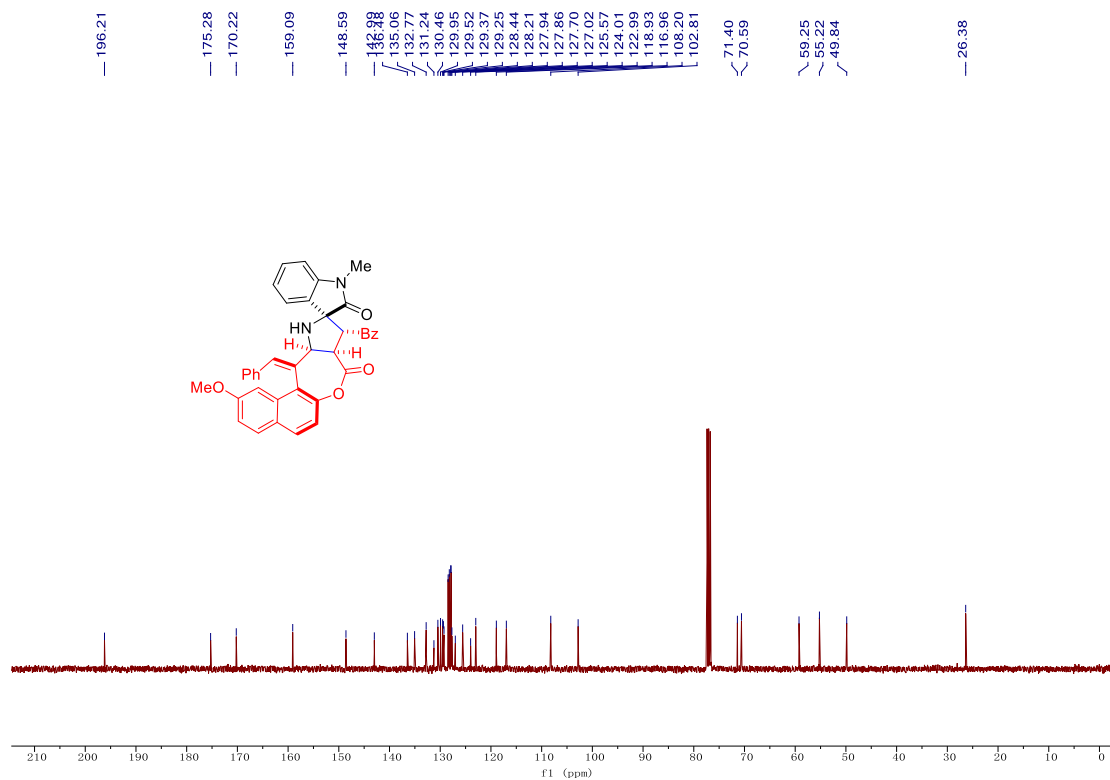

5ka

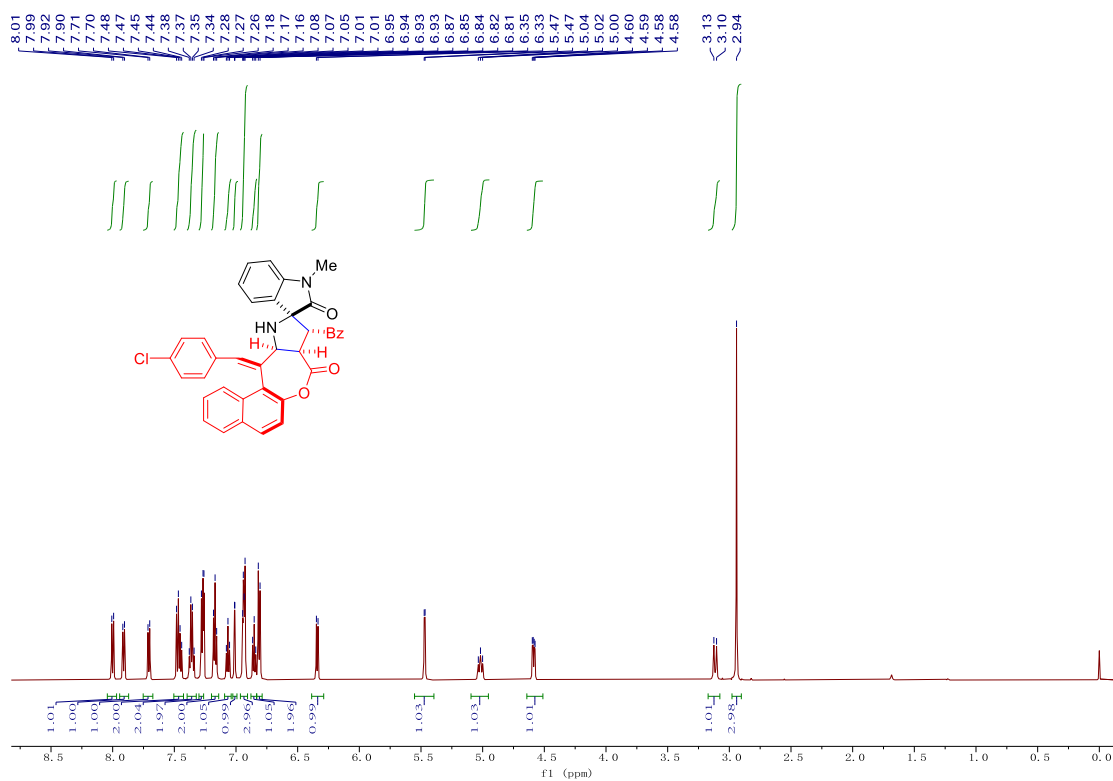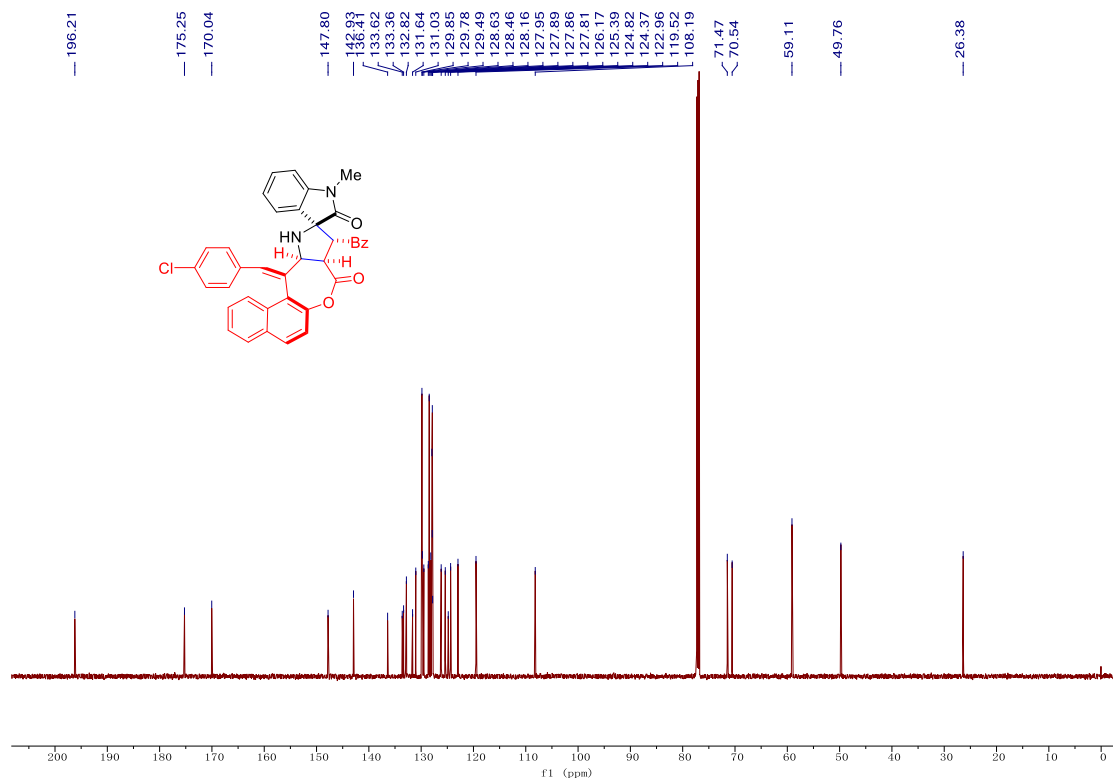

51a

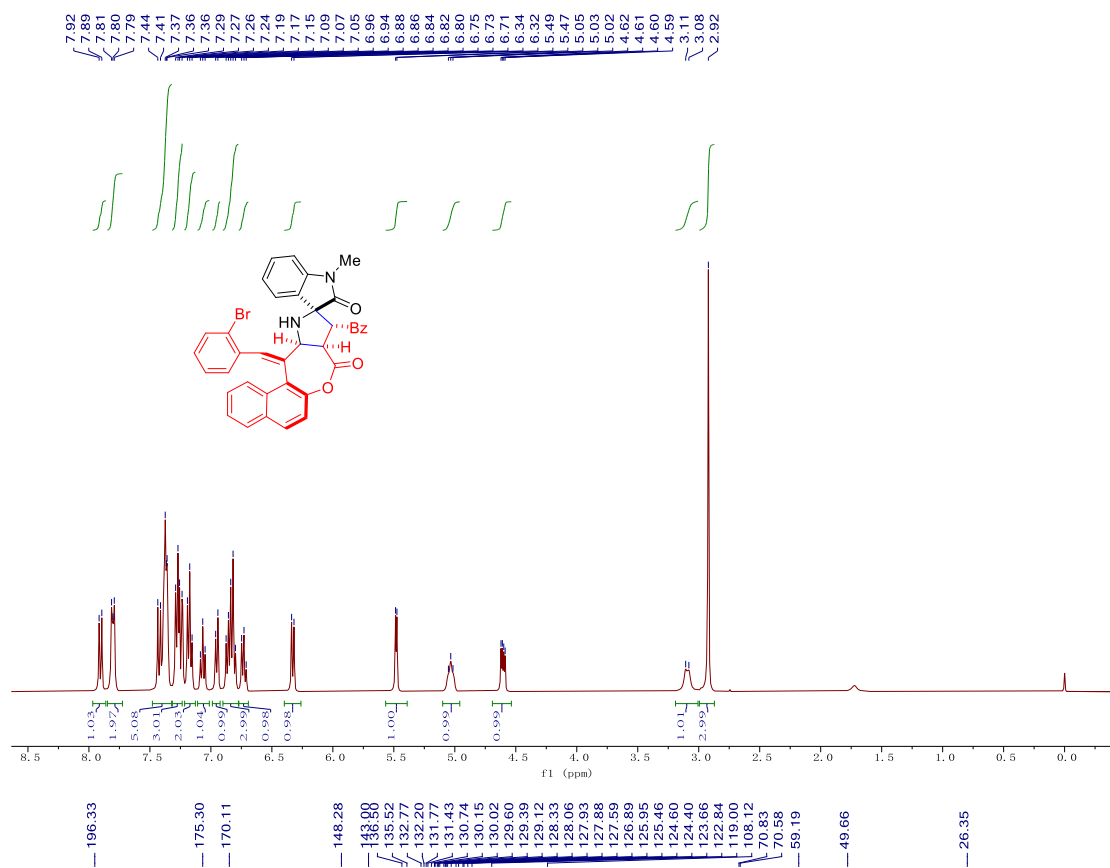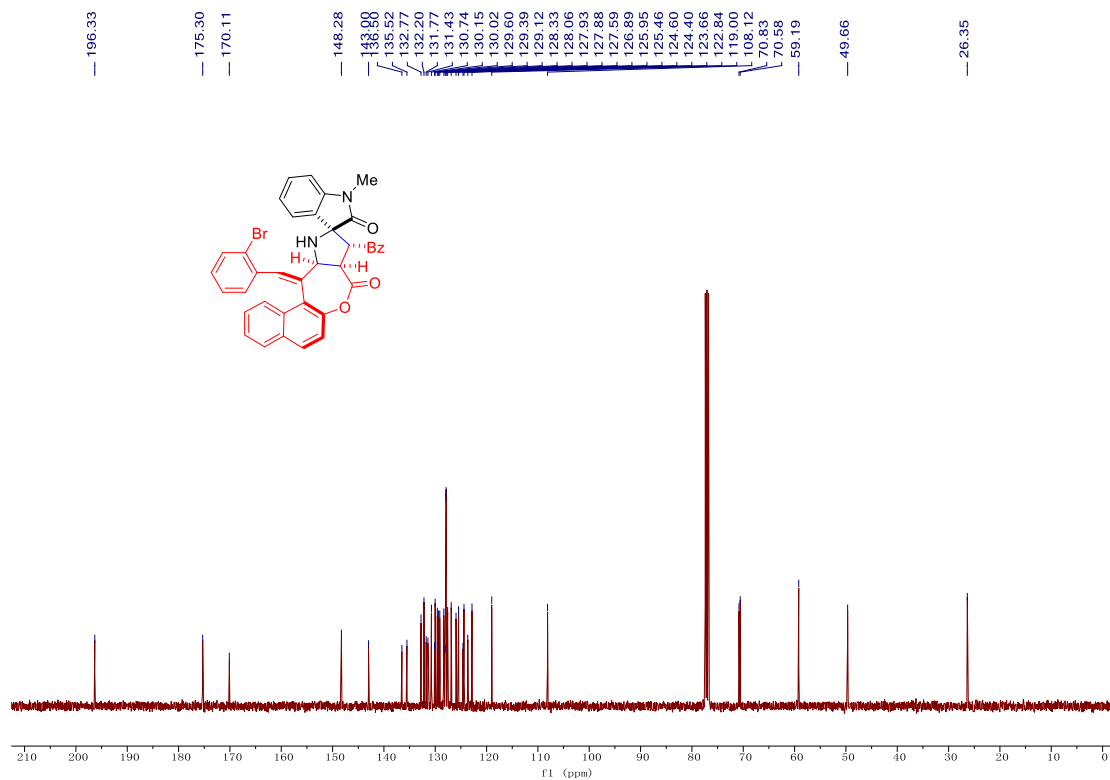

# 5ma

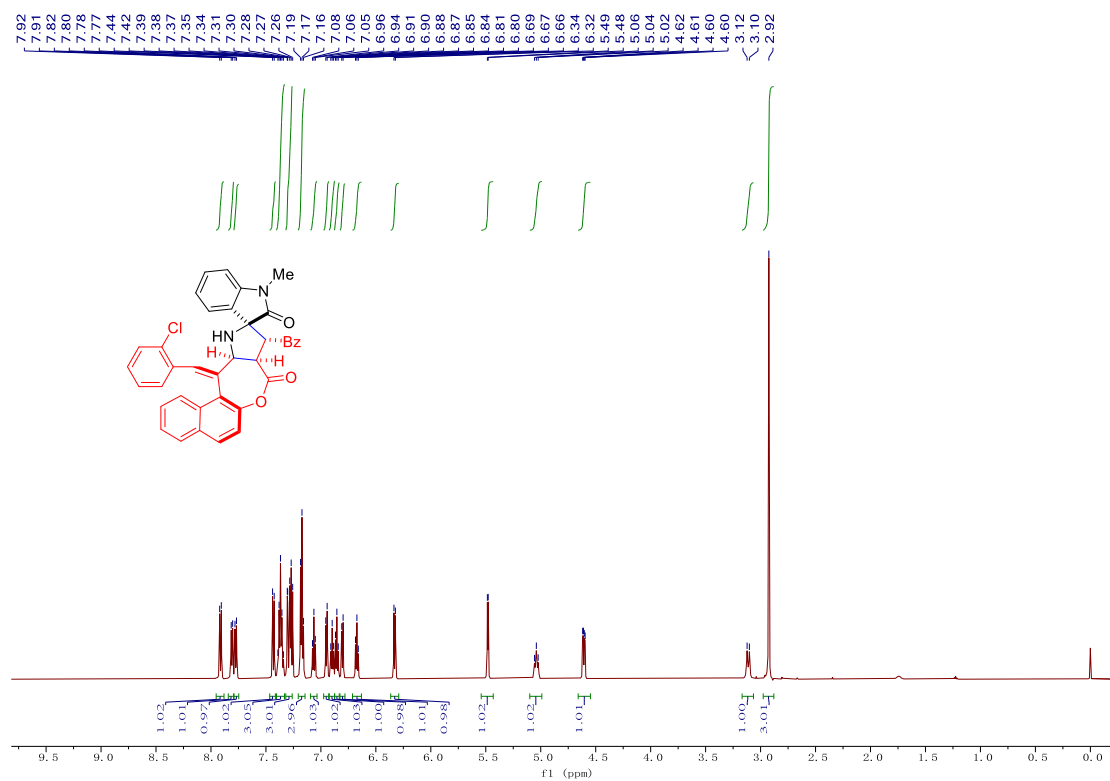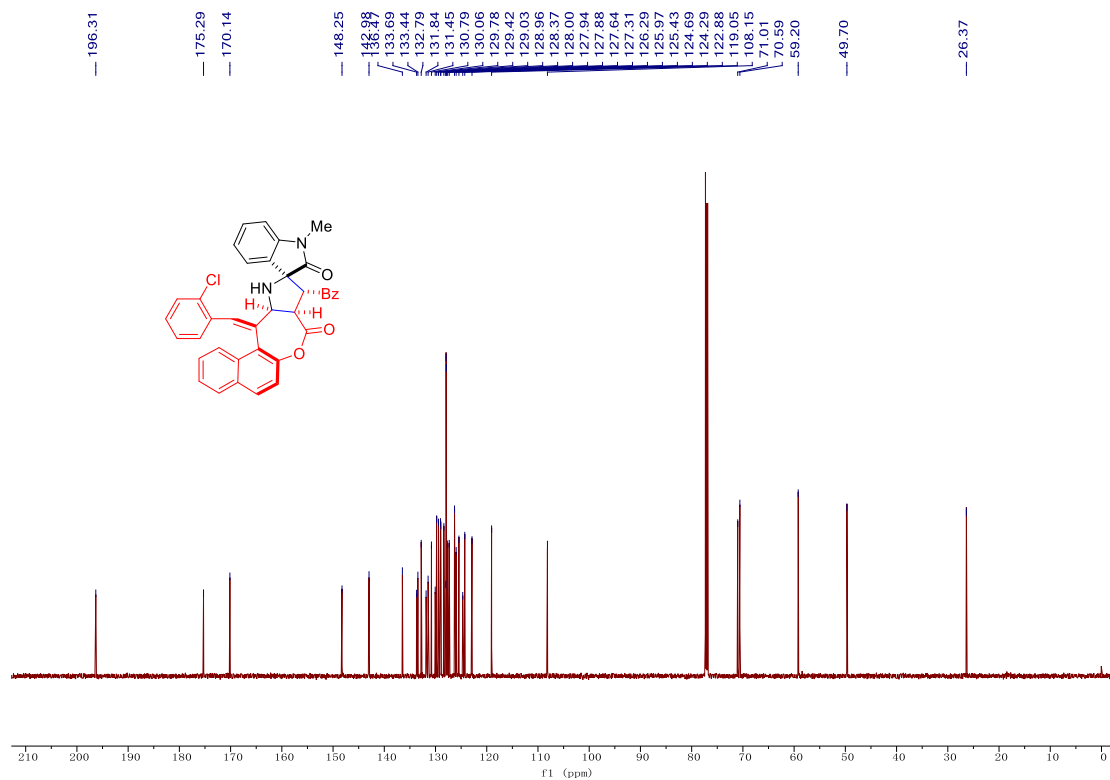



# 5na

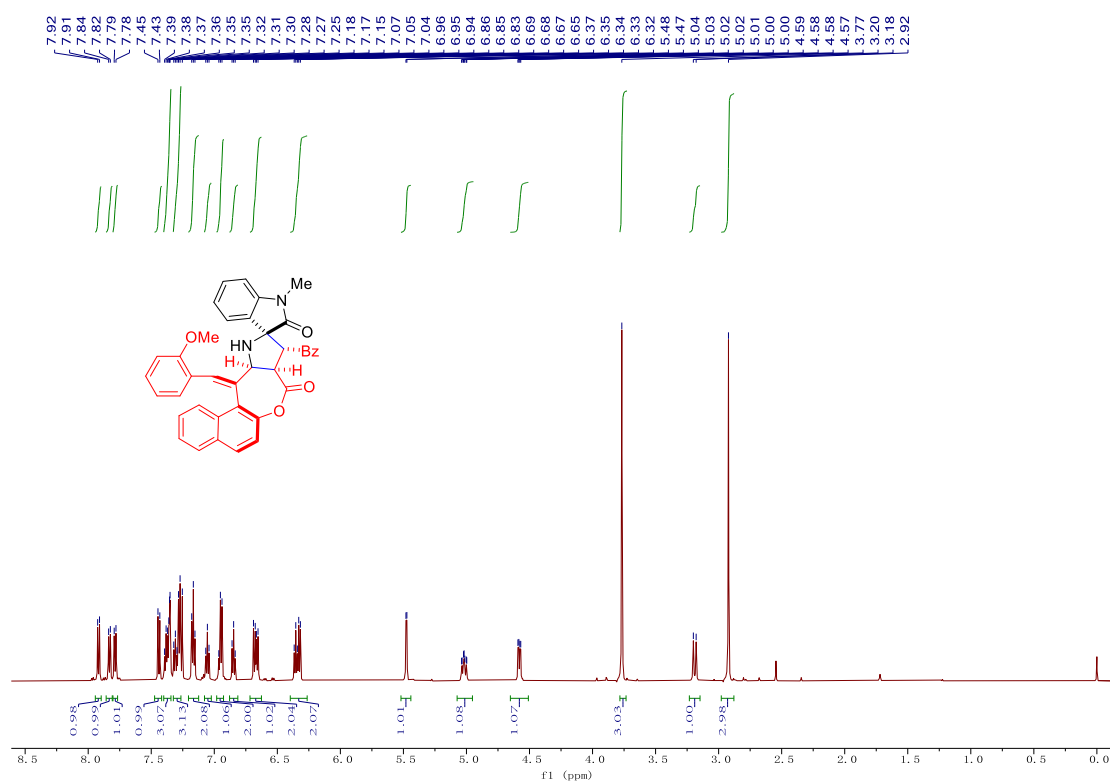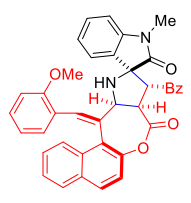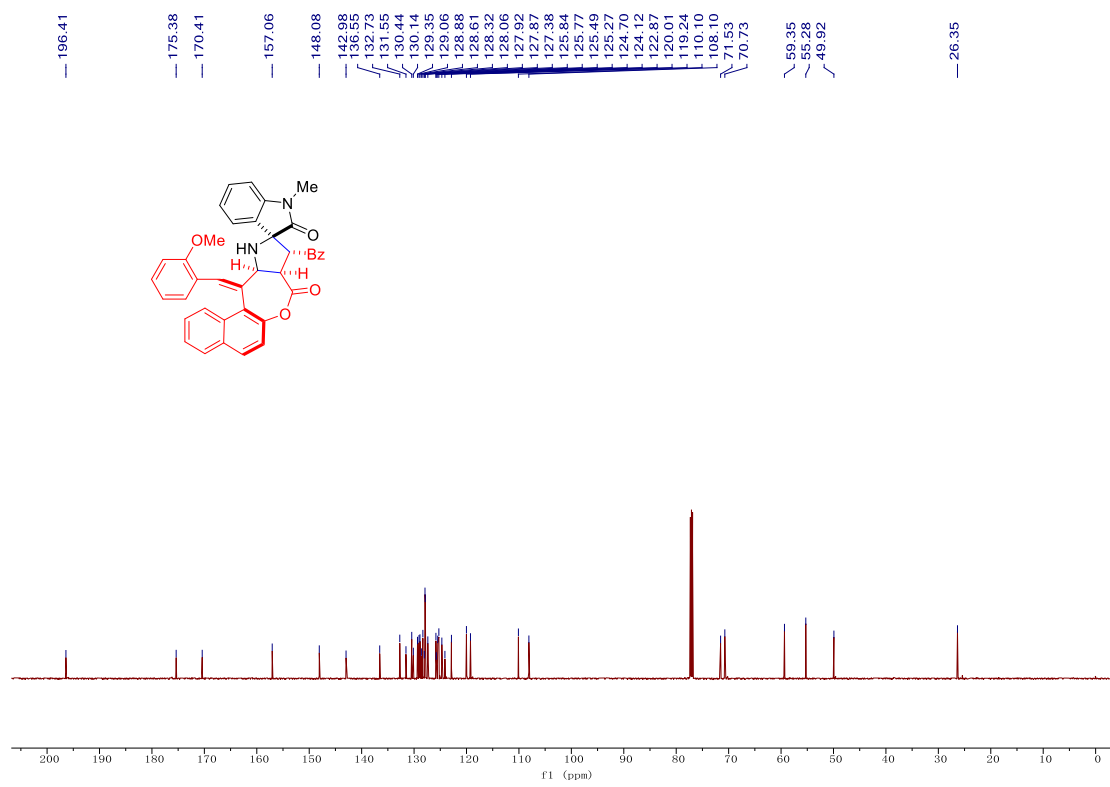

6

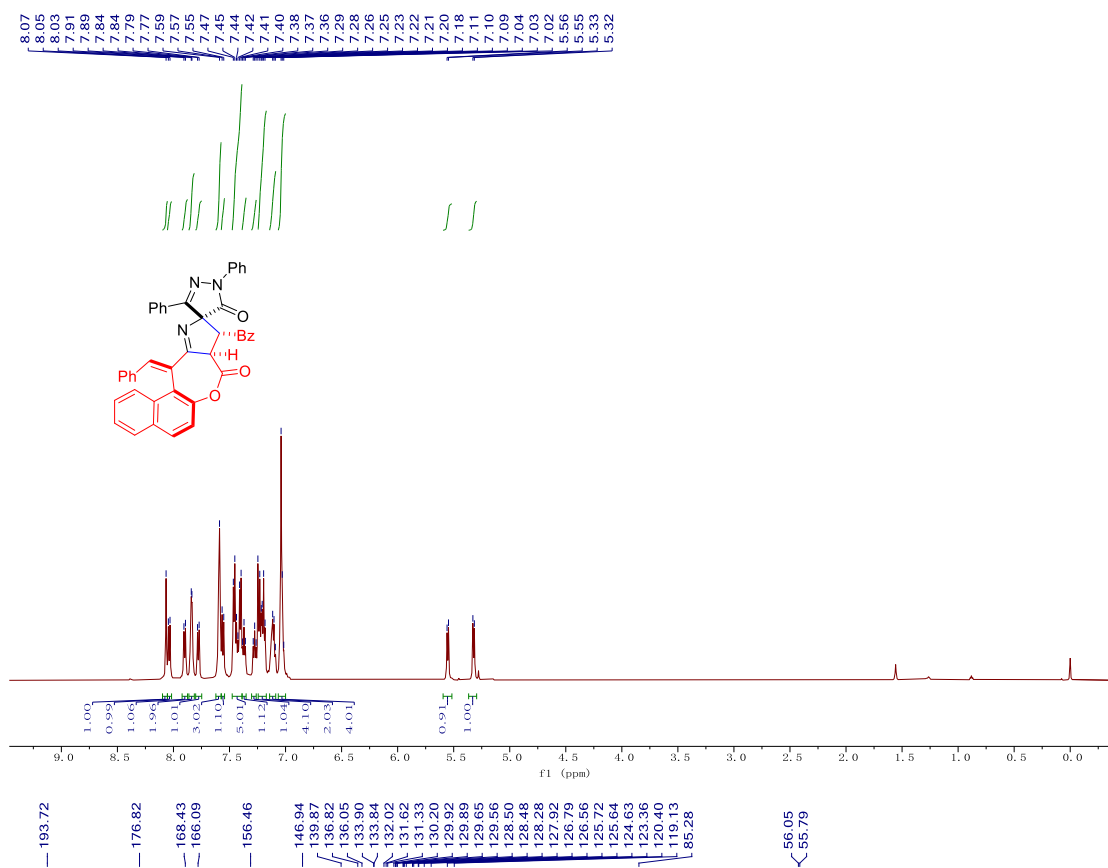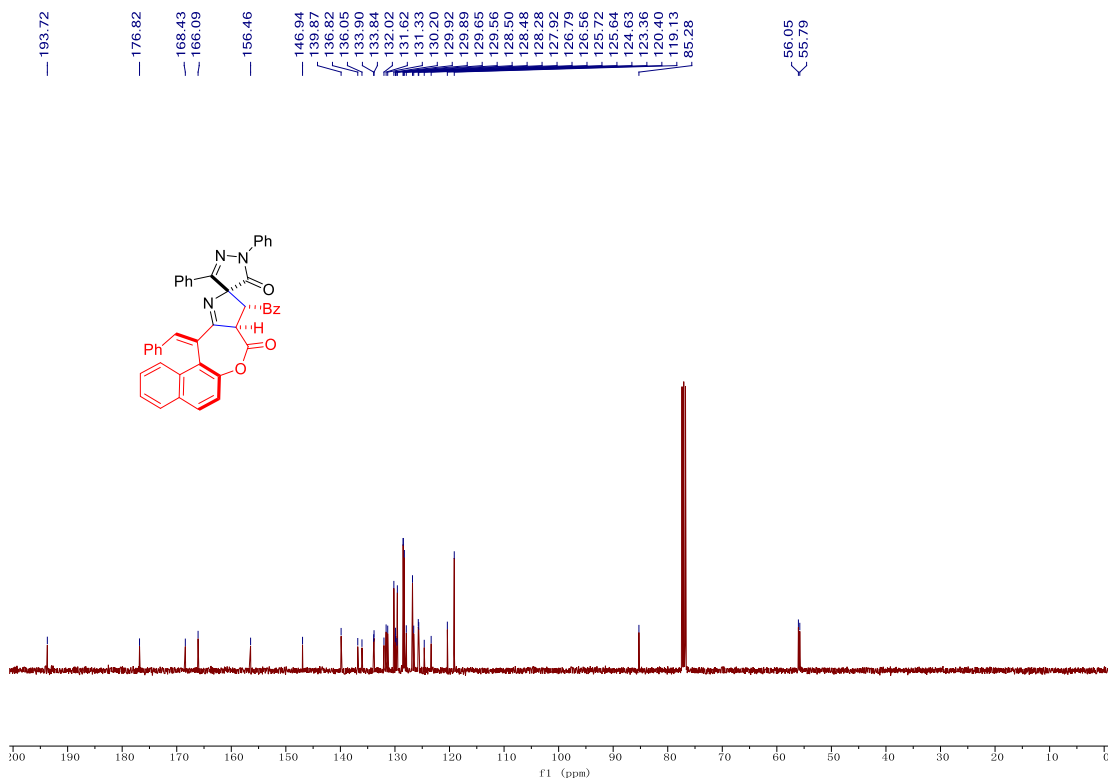

7

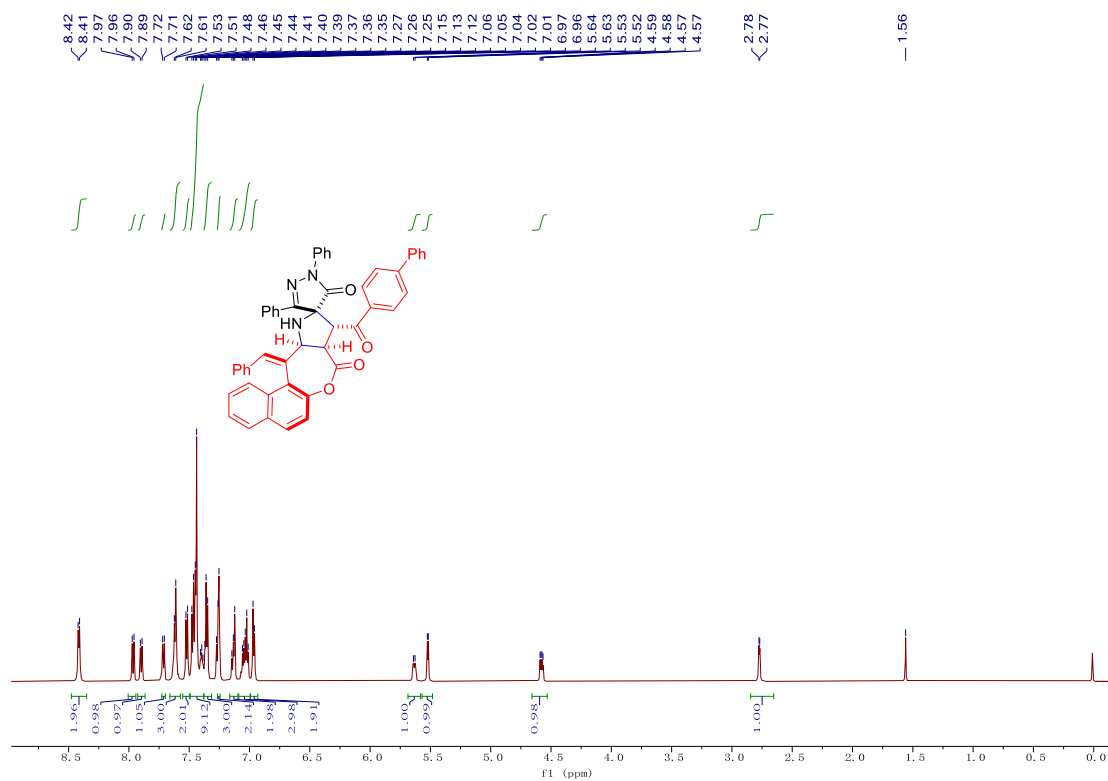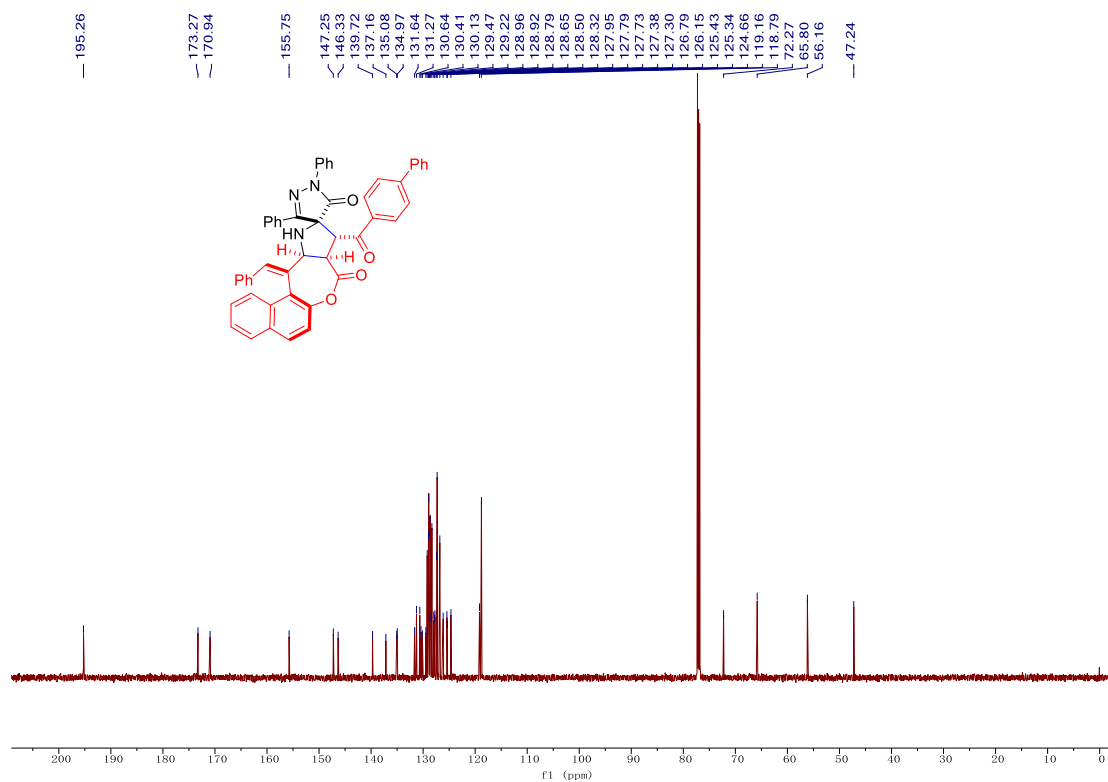

8

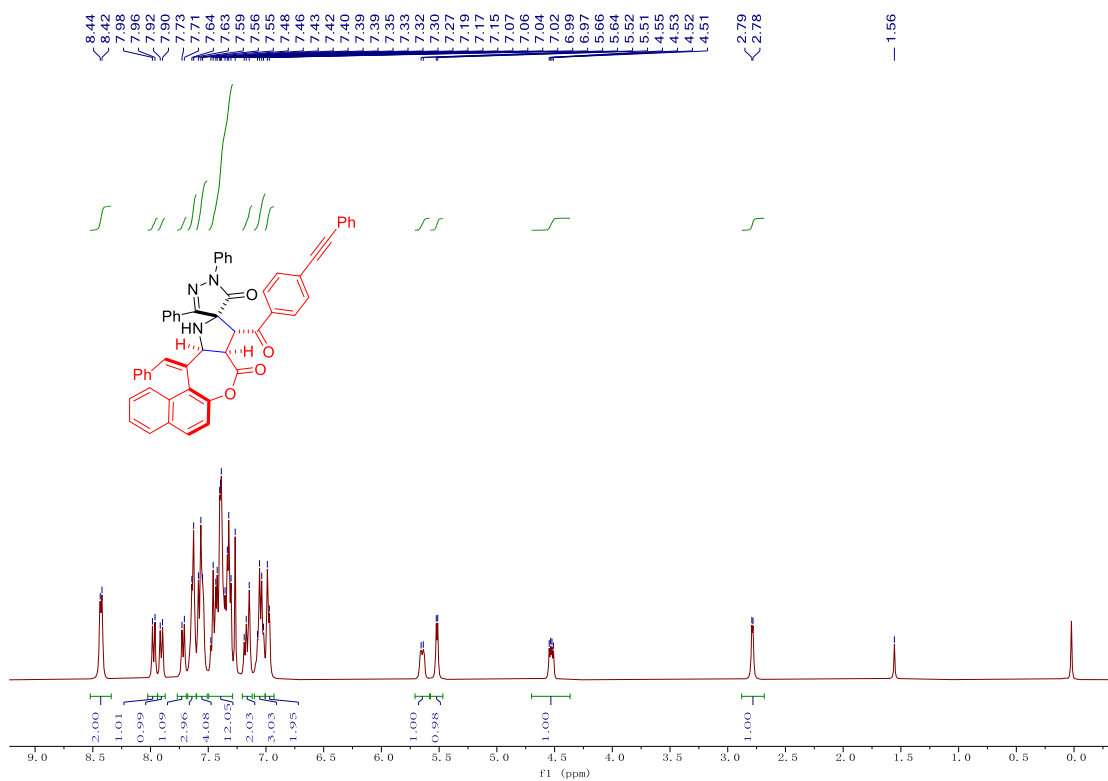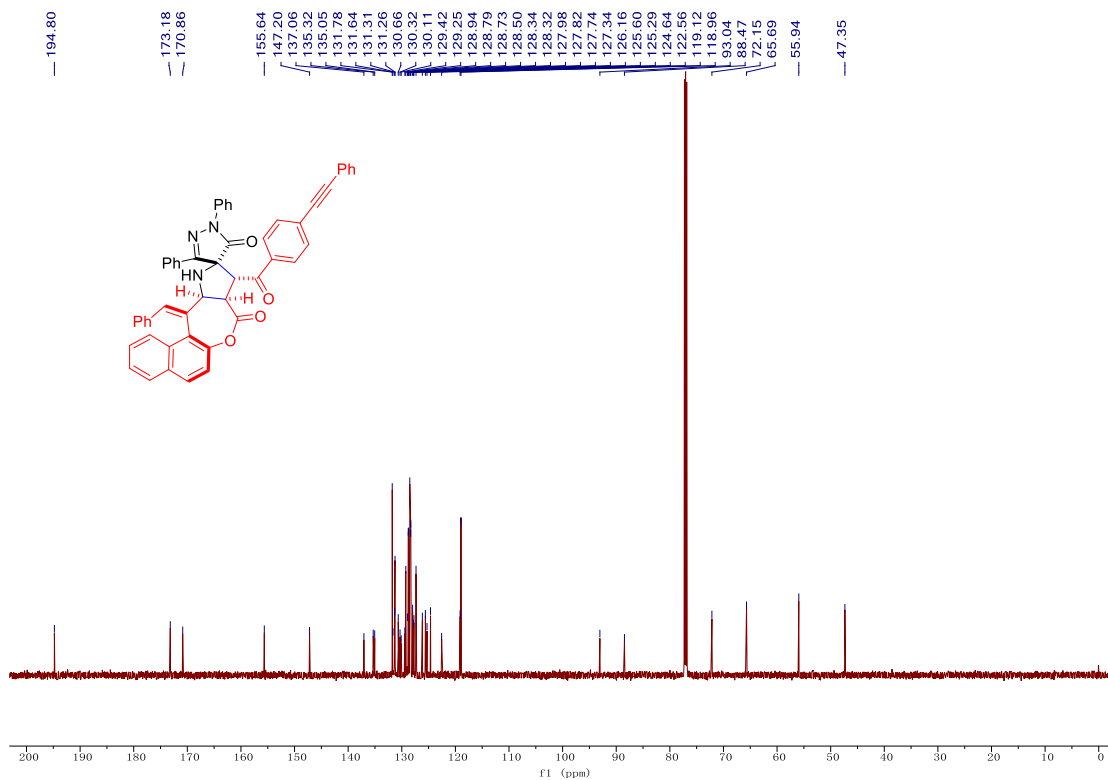

9

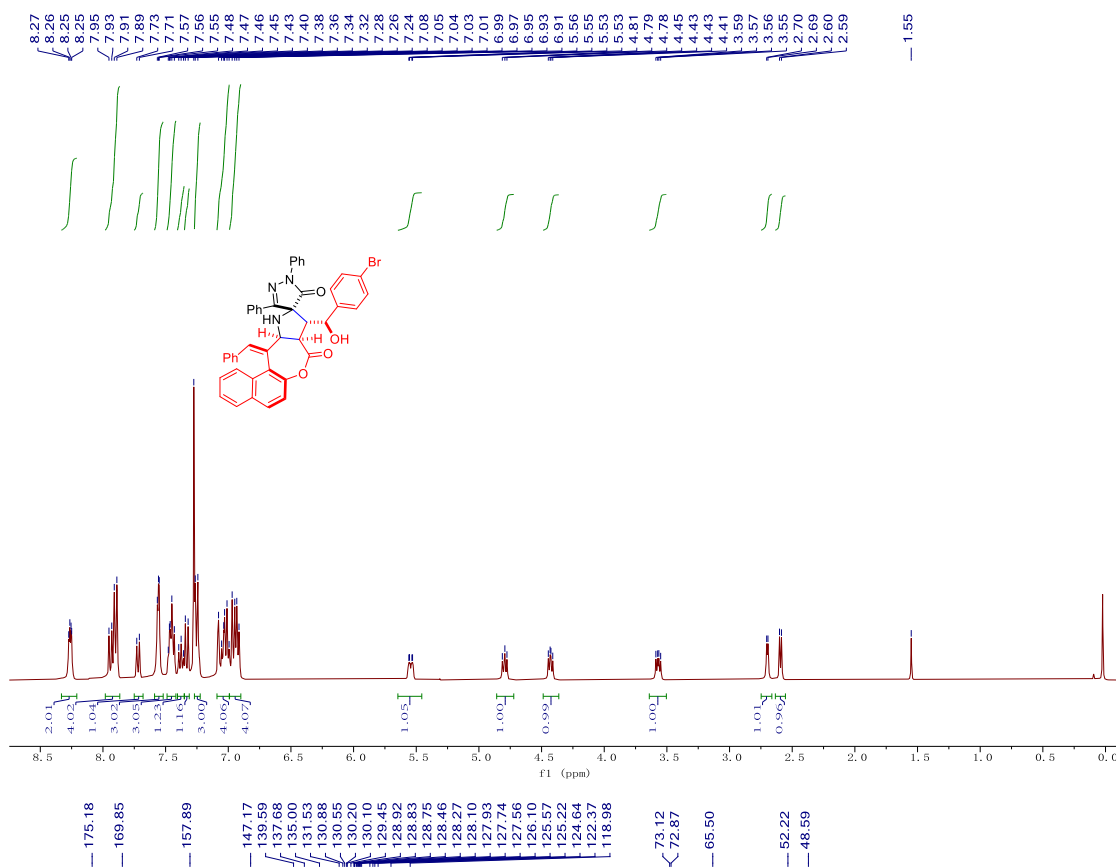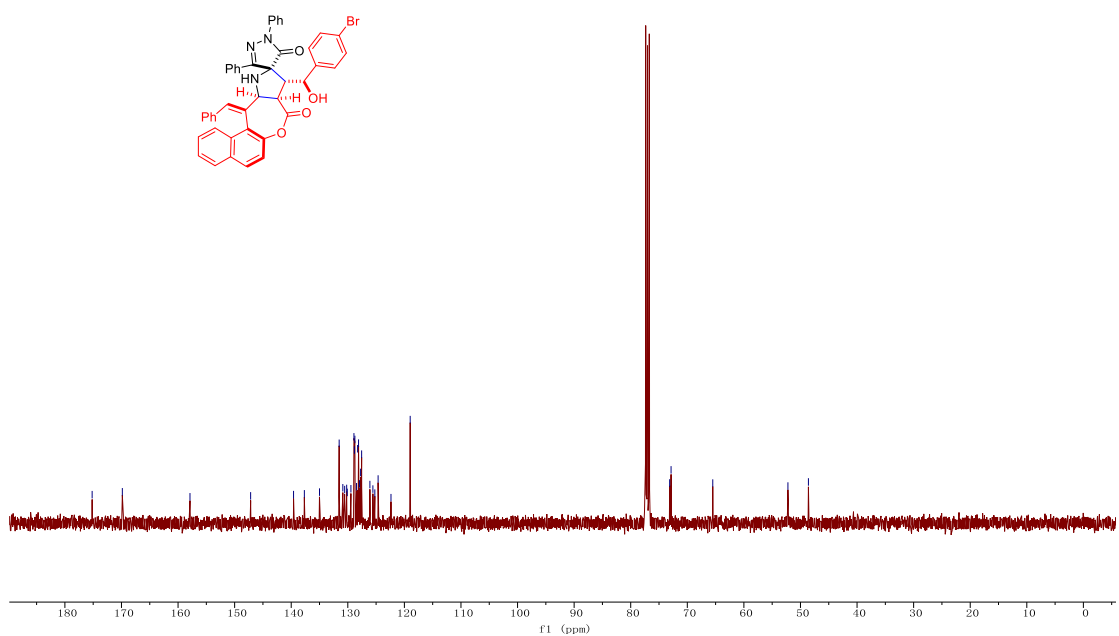

10

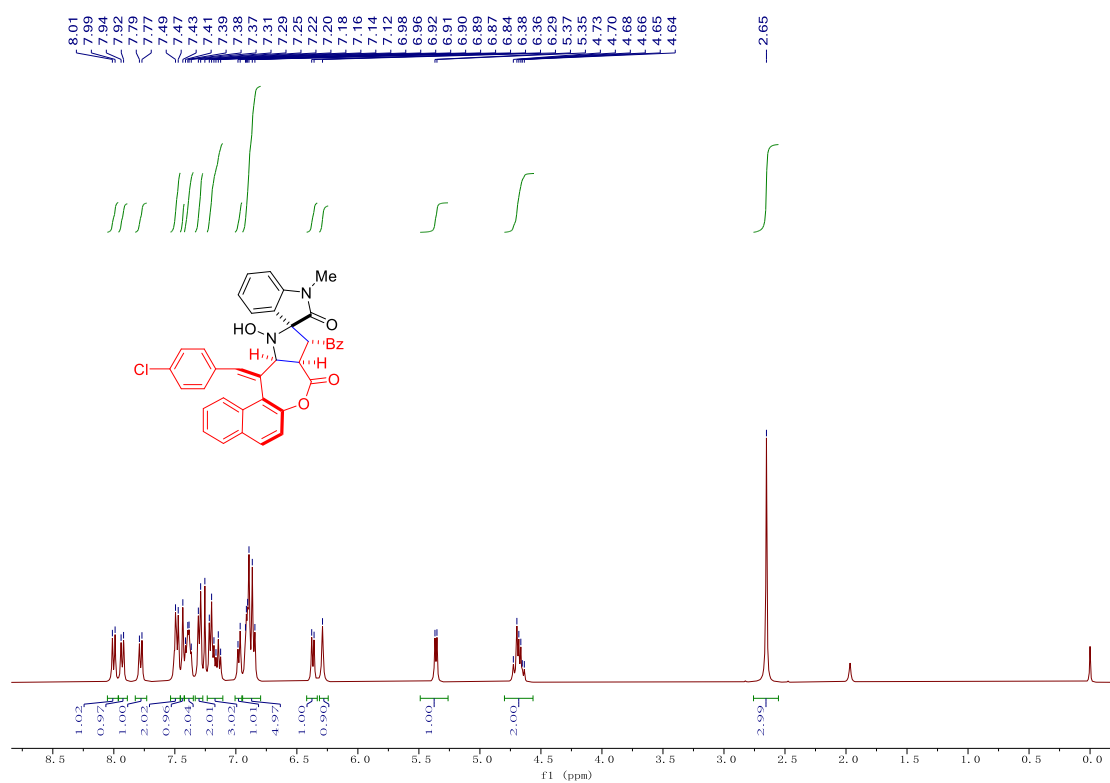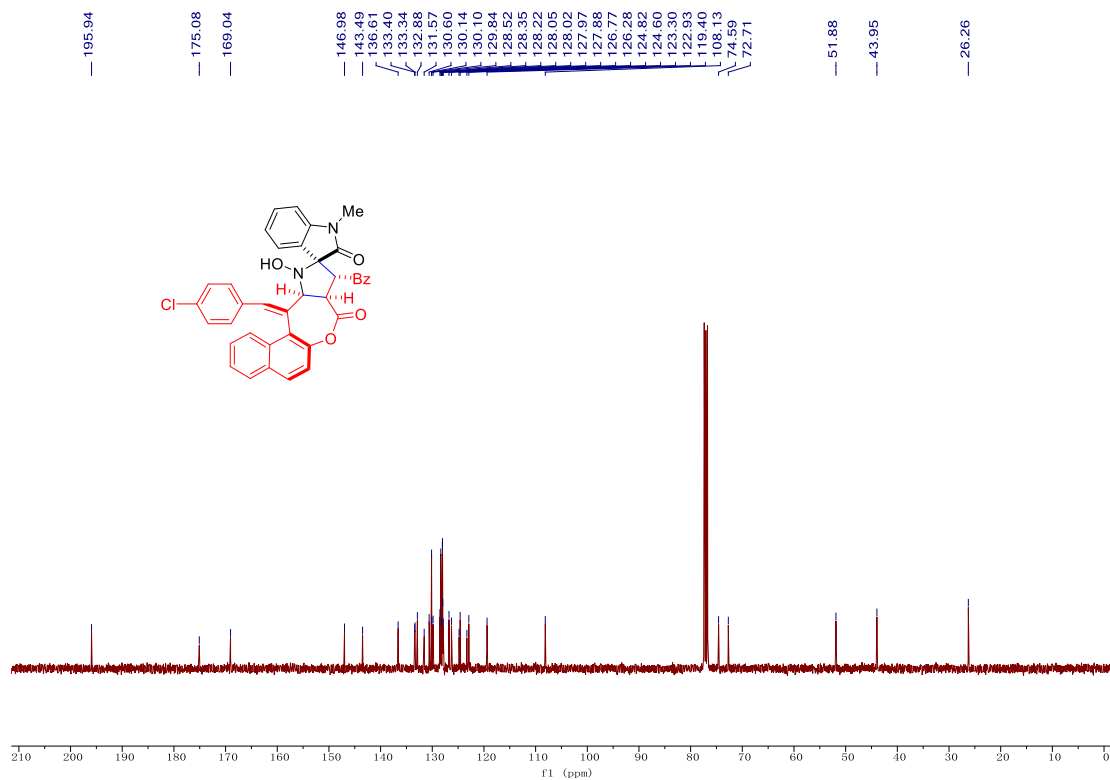

**11a**

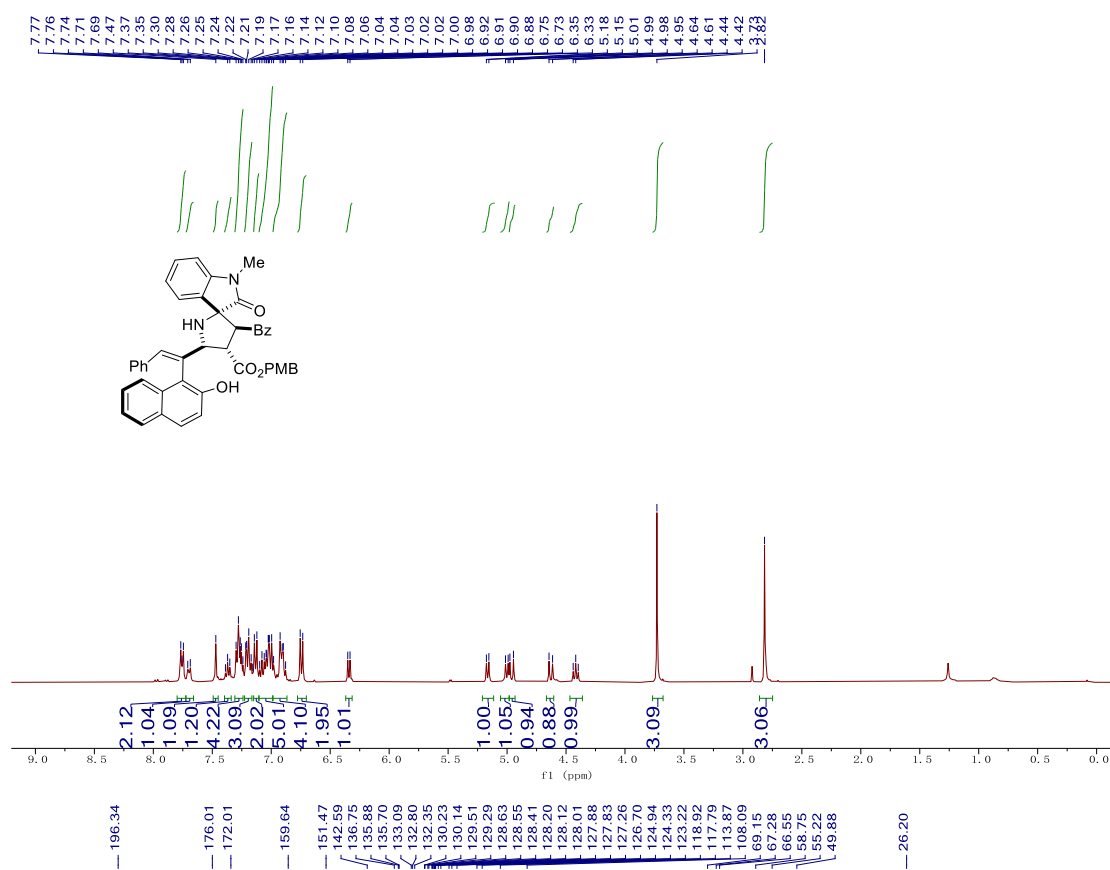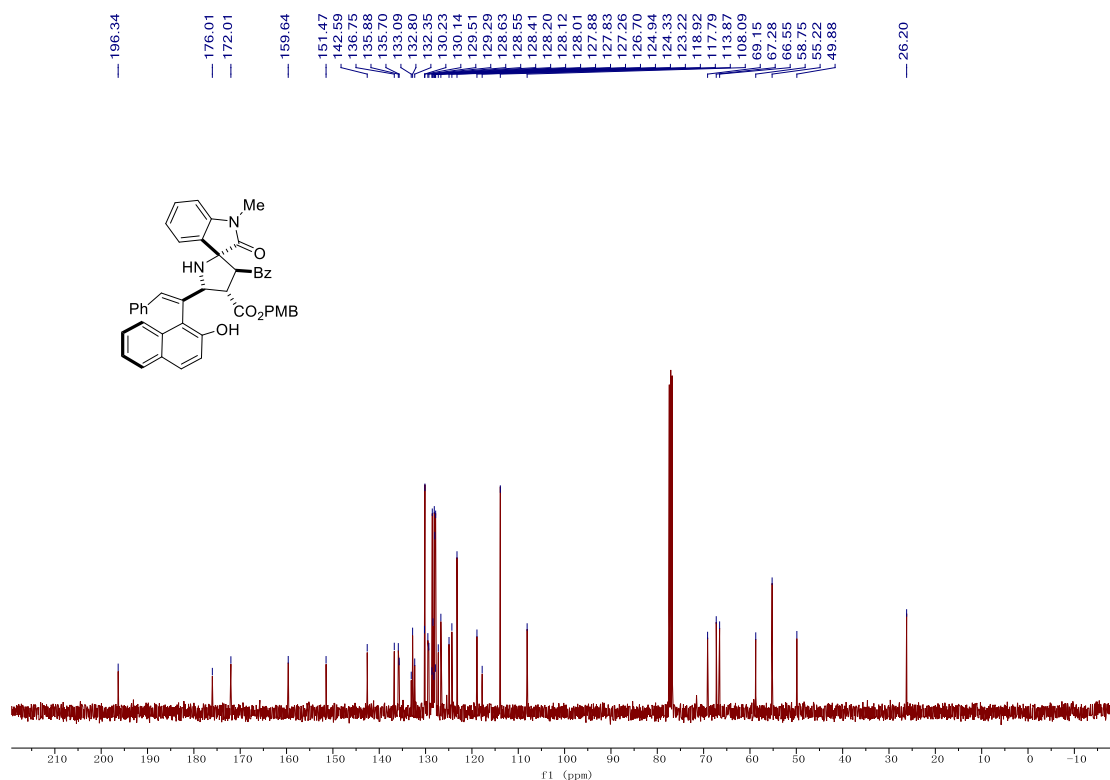

11b

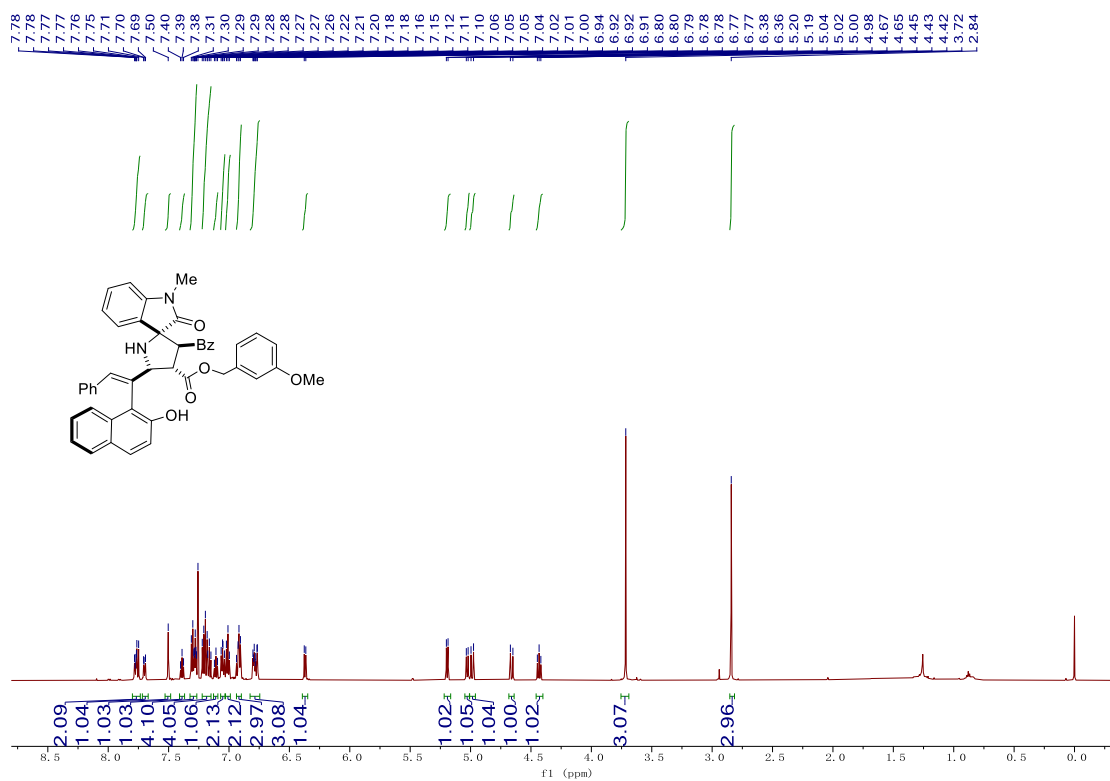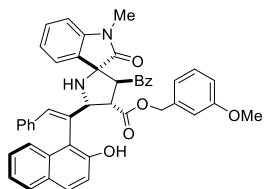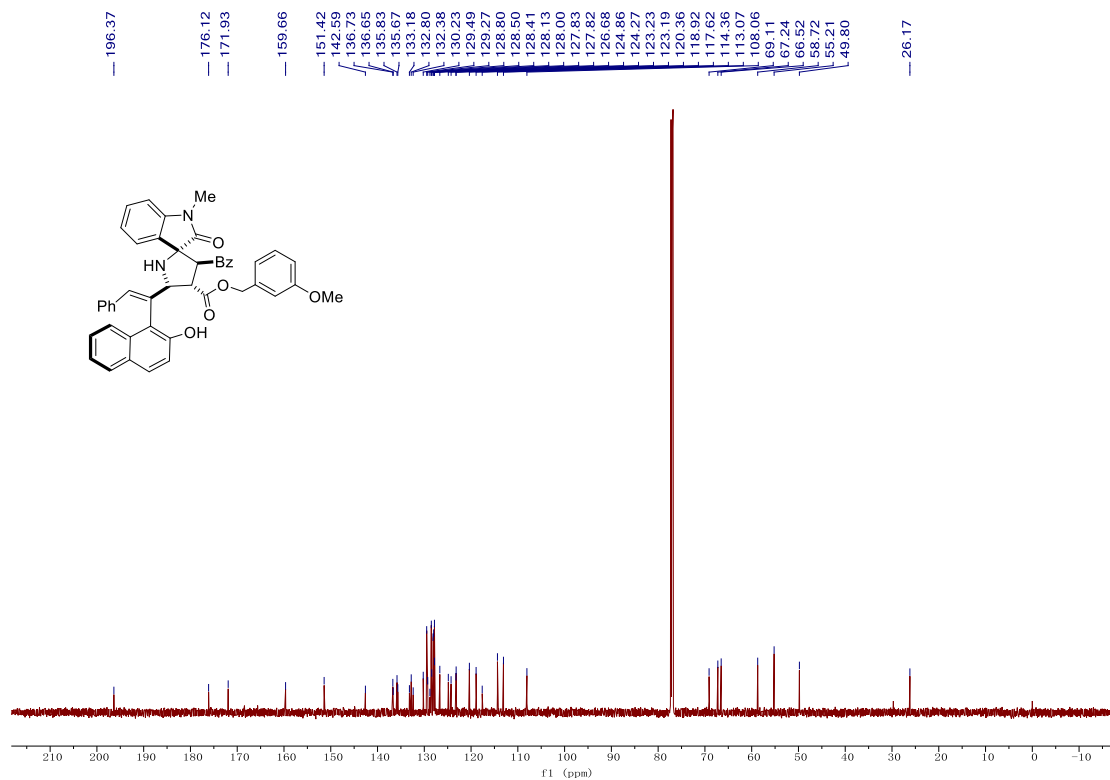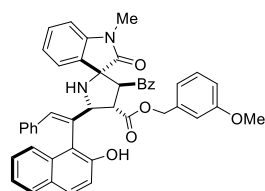



11c

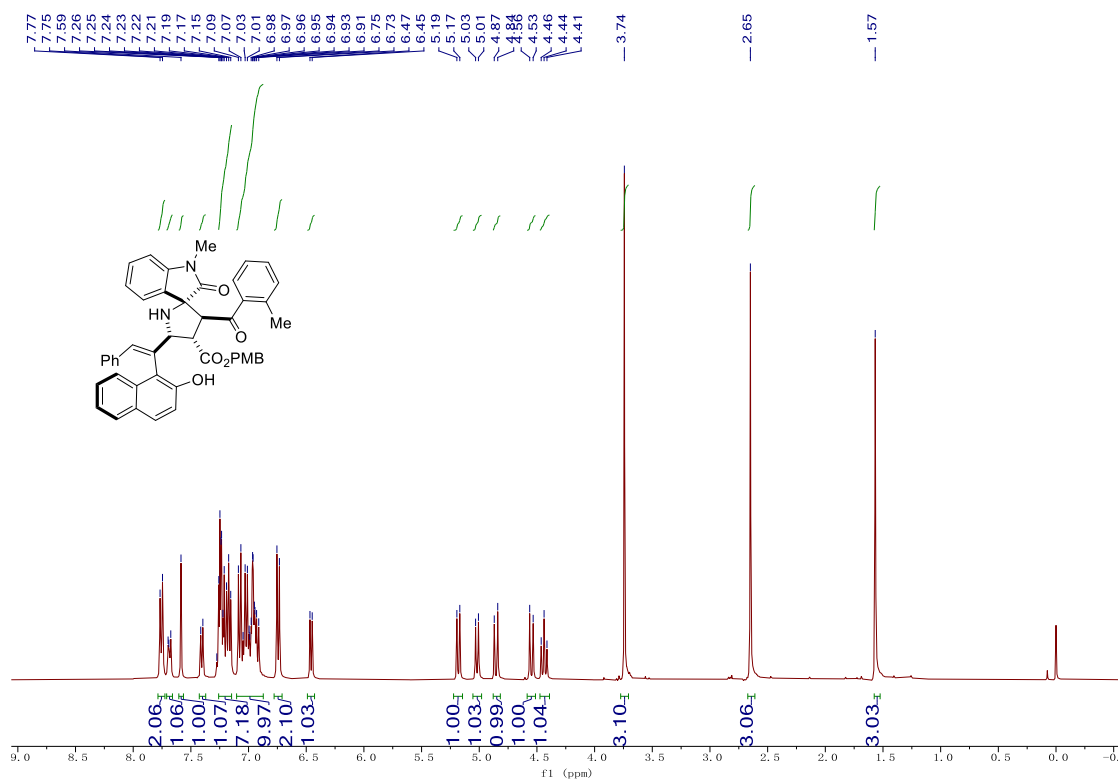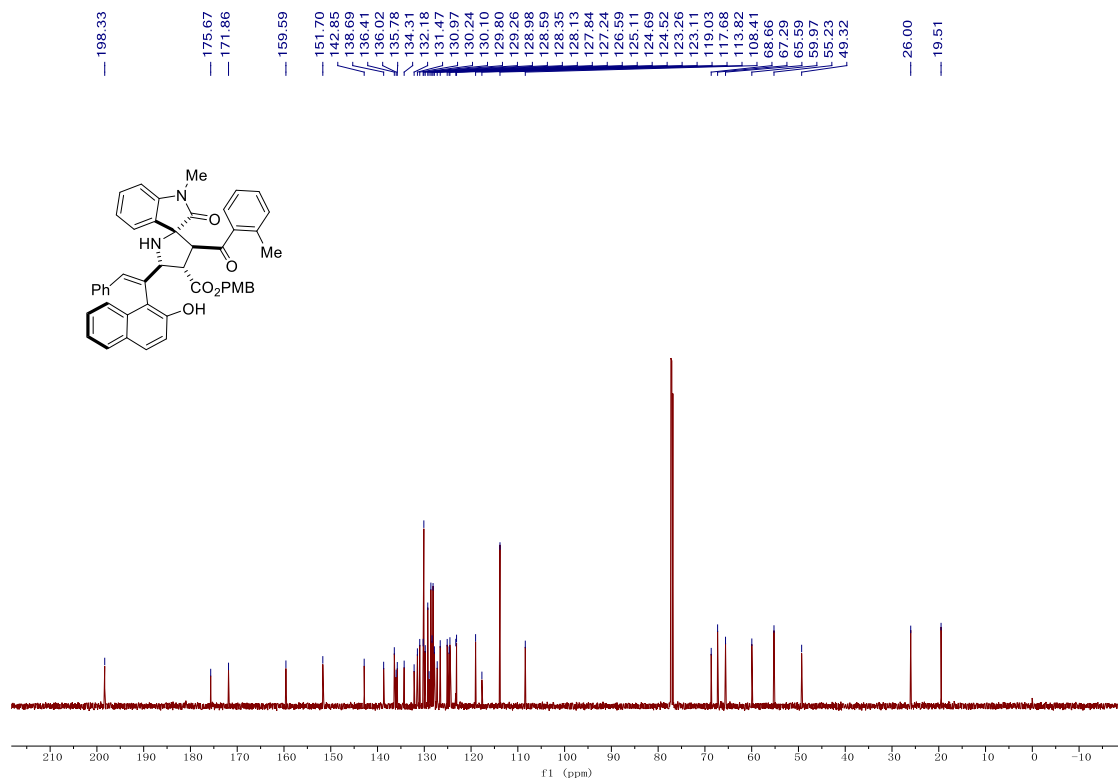

11d

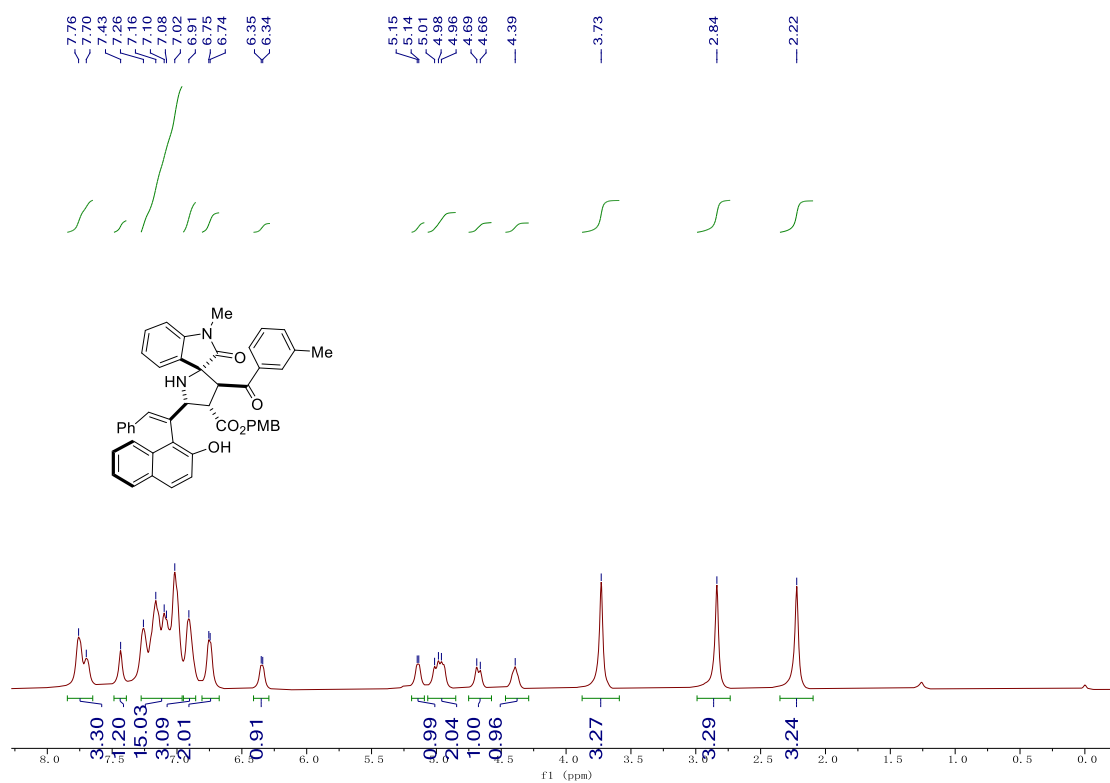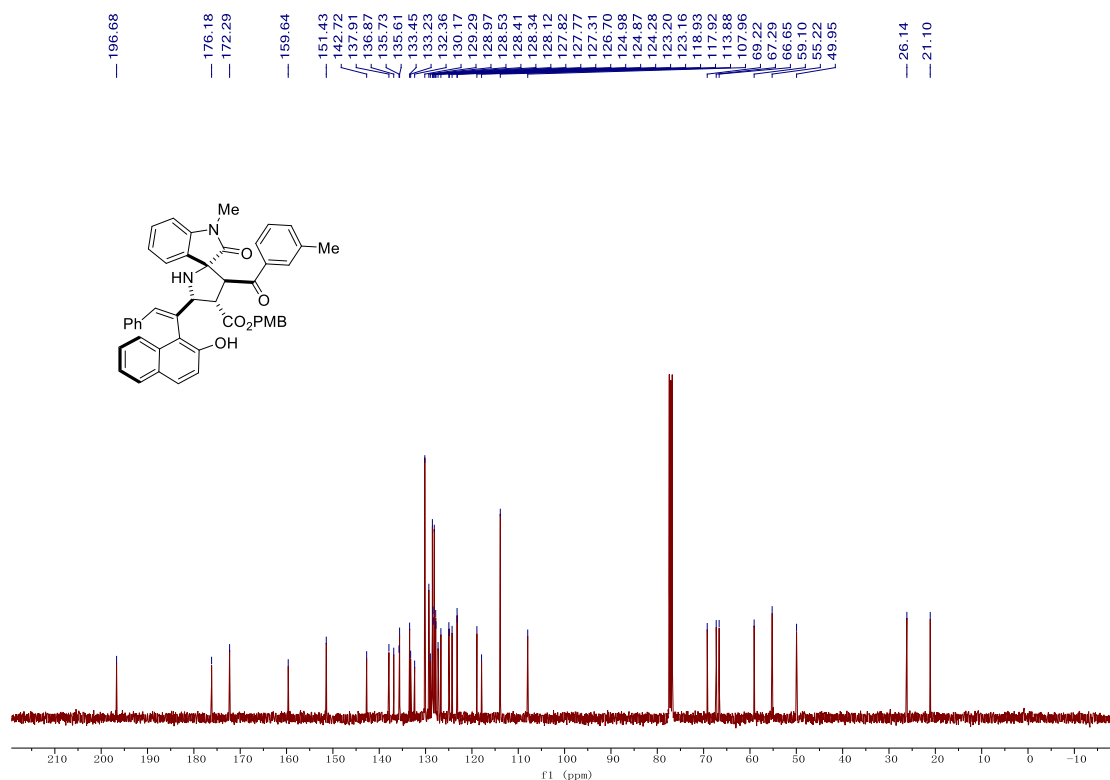

11e

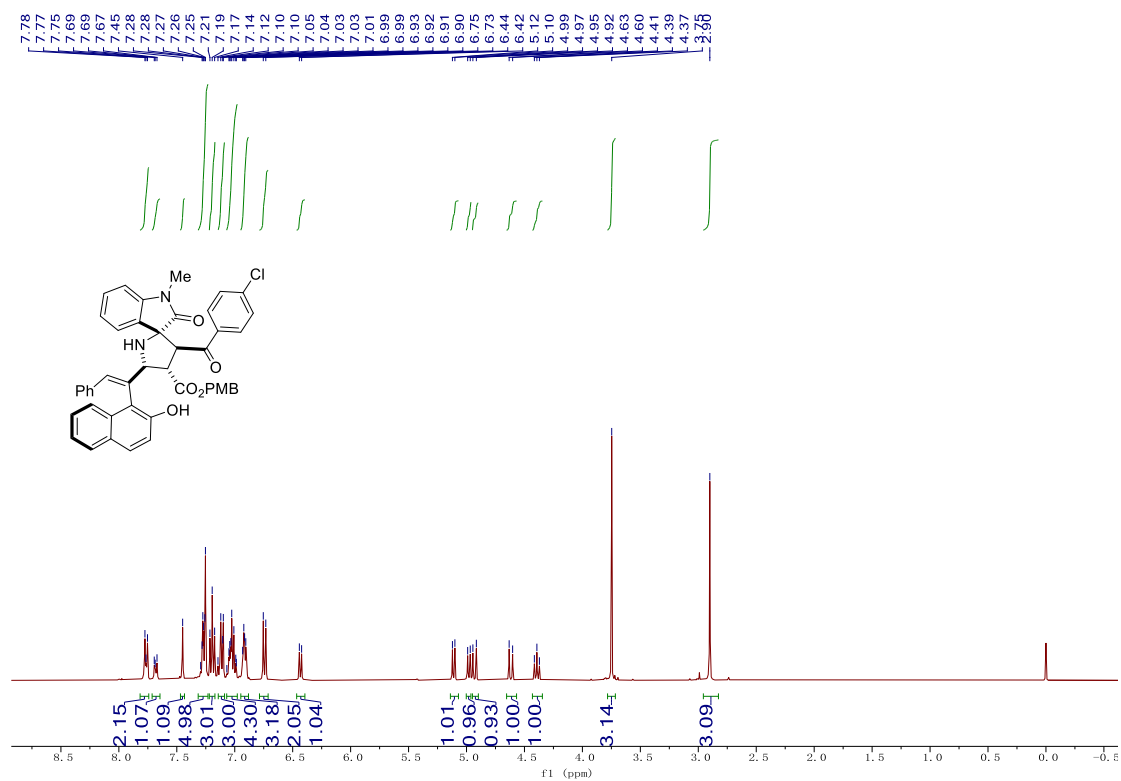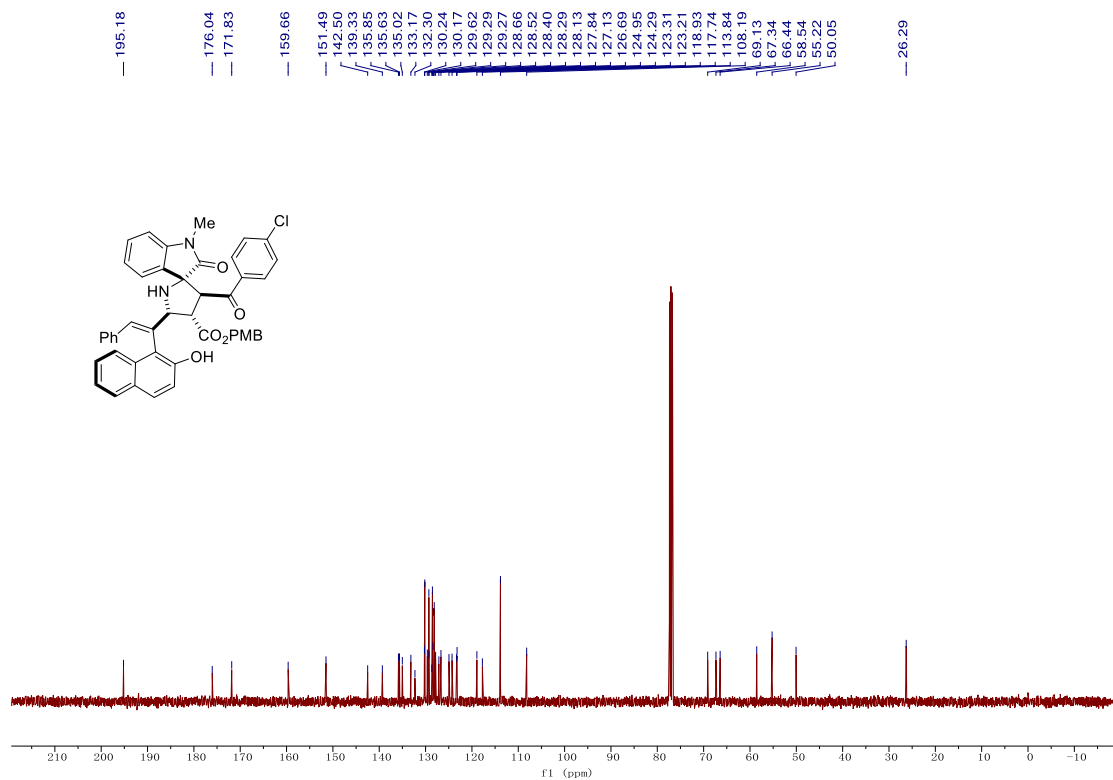

11f

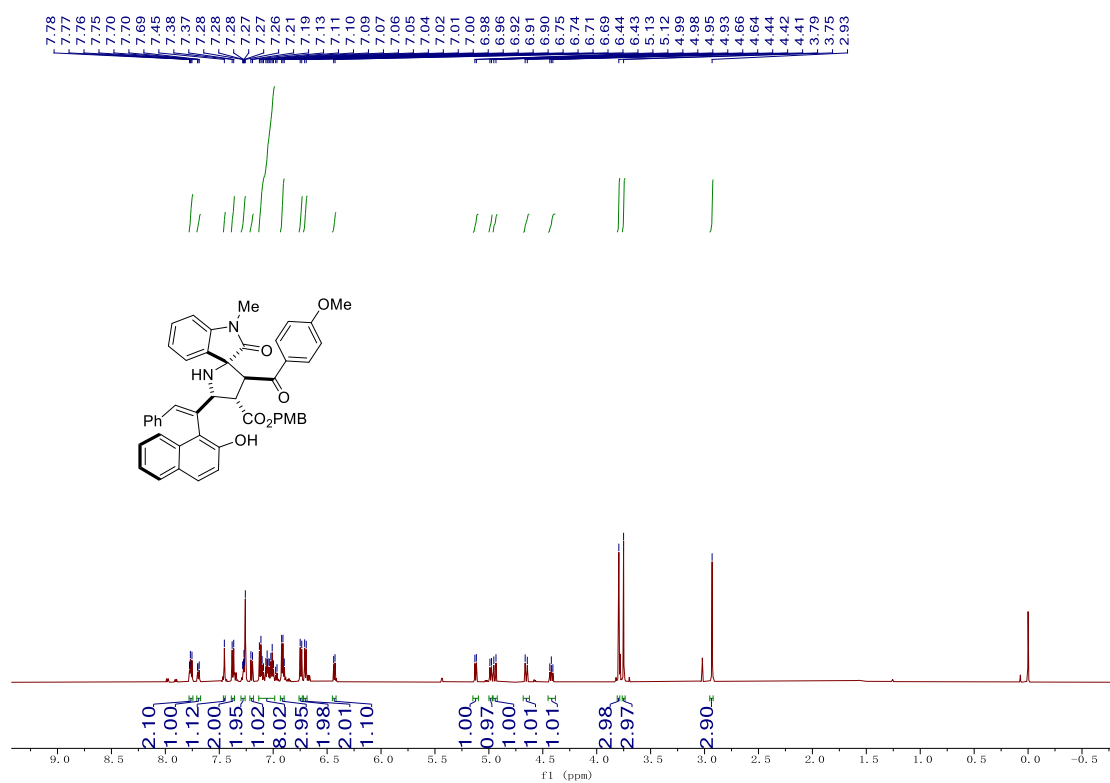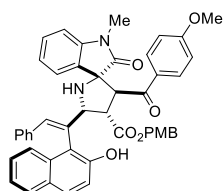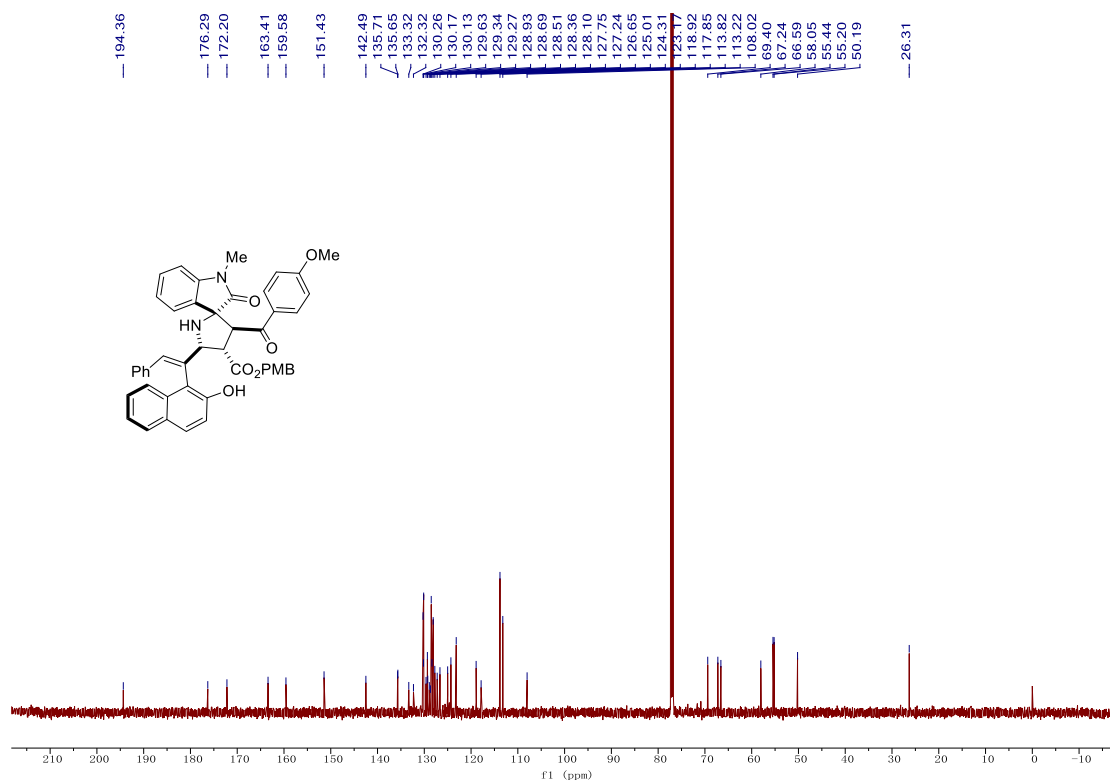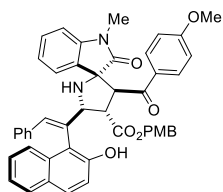

# 11g

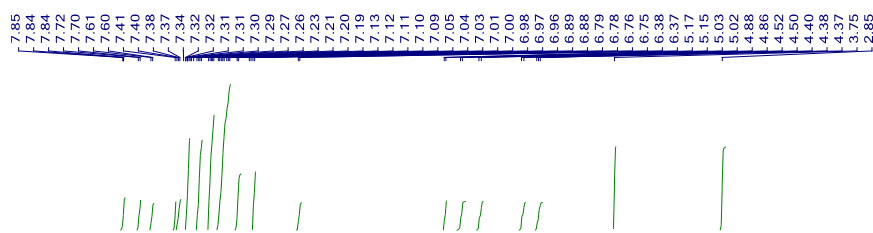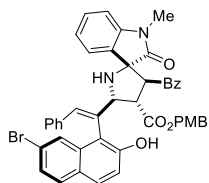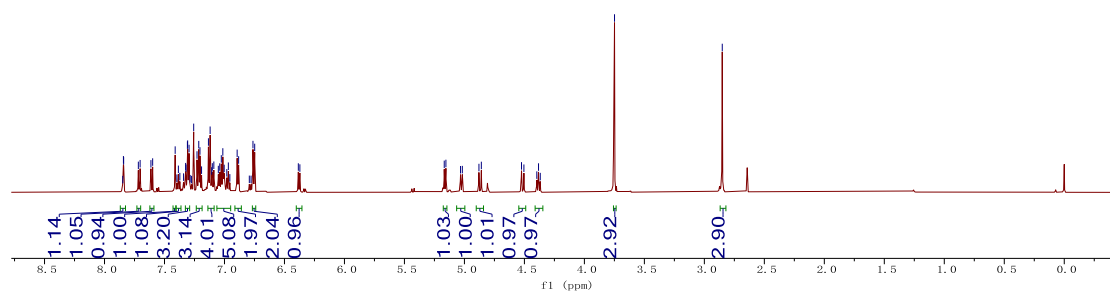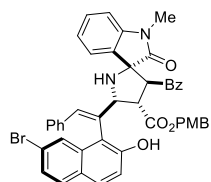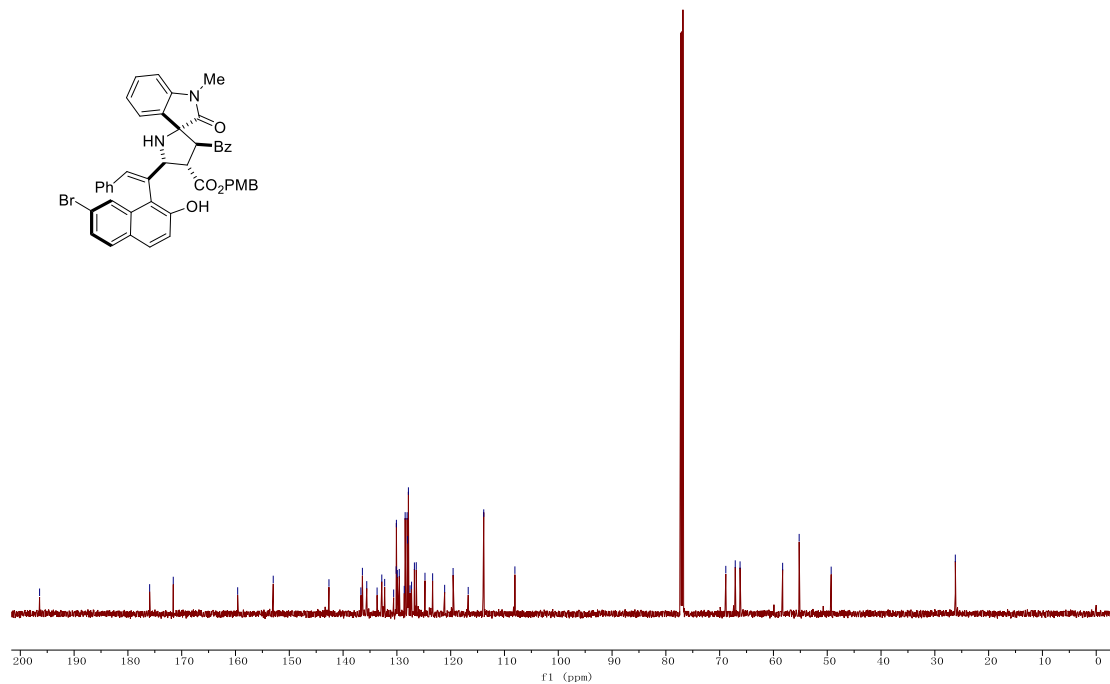

11h

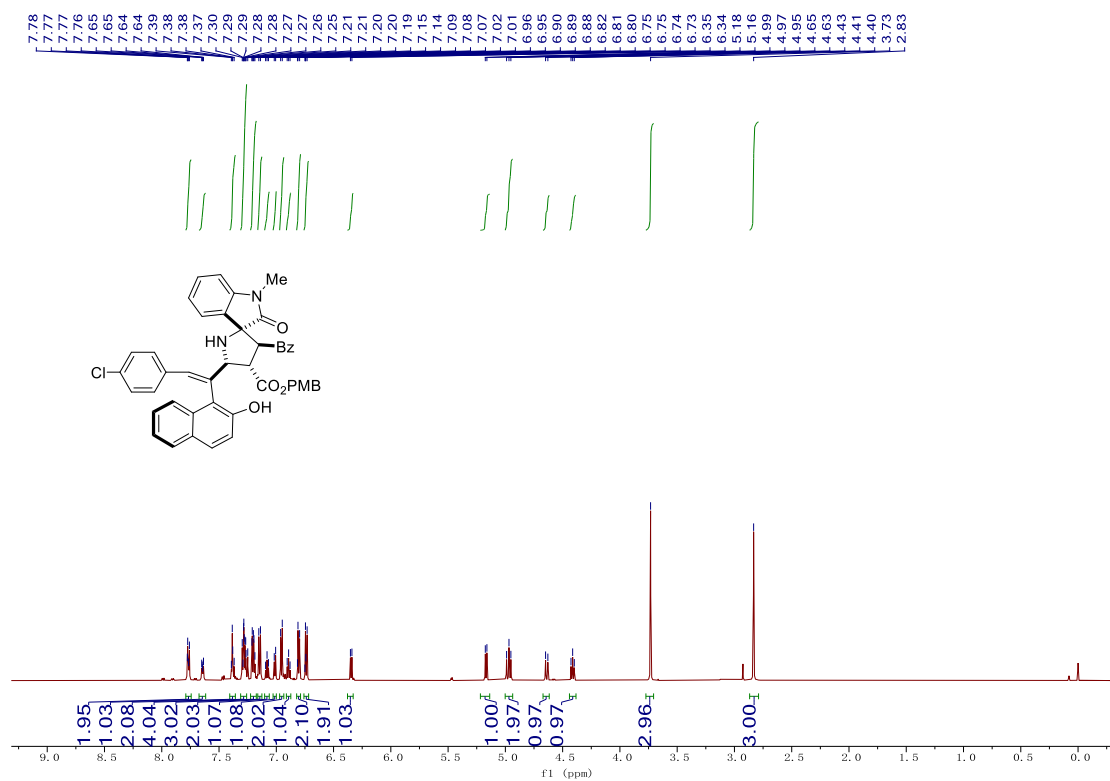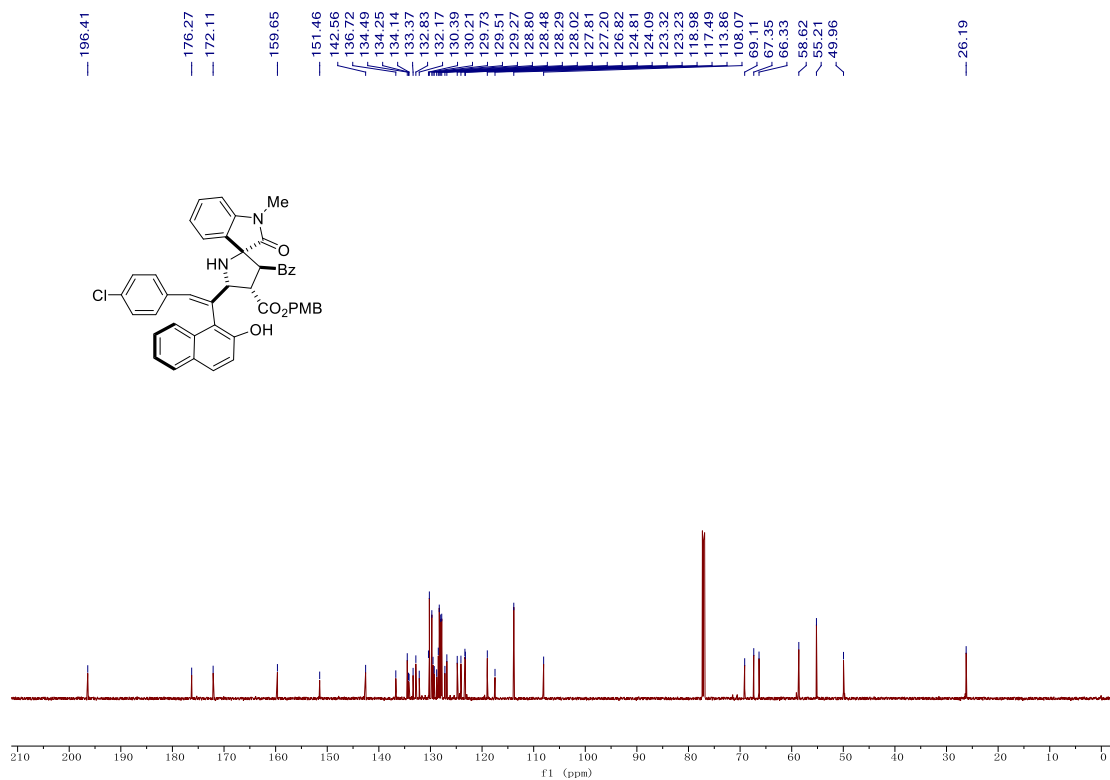

11i

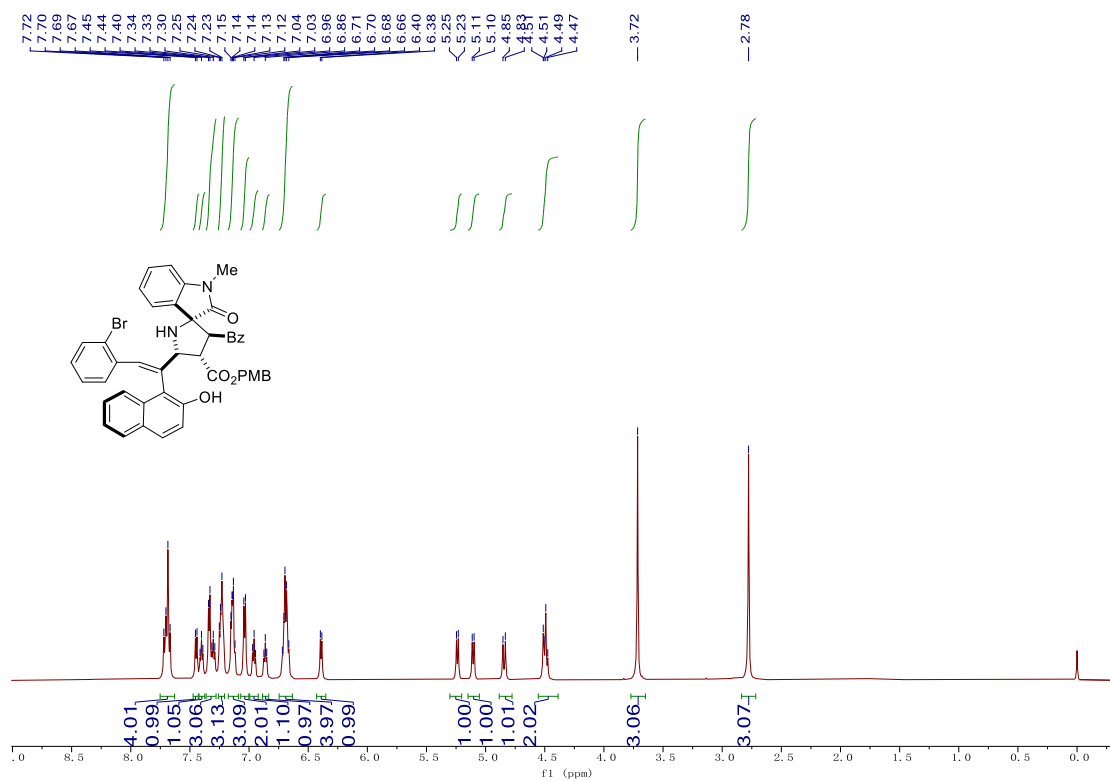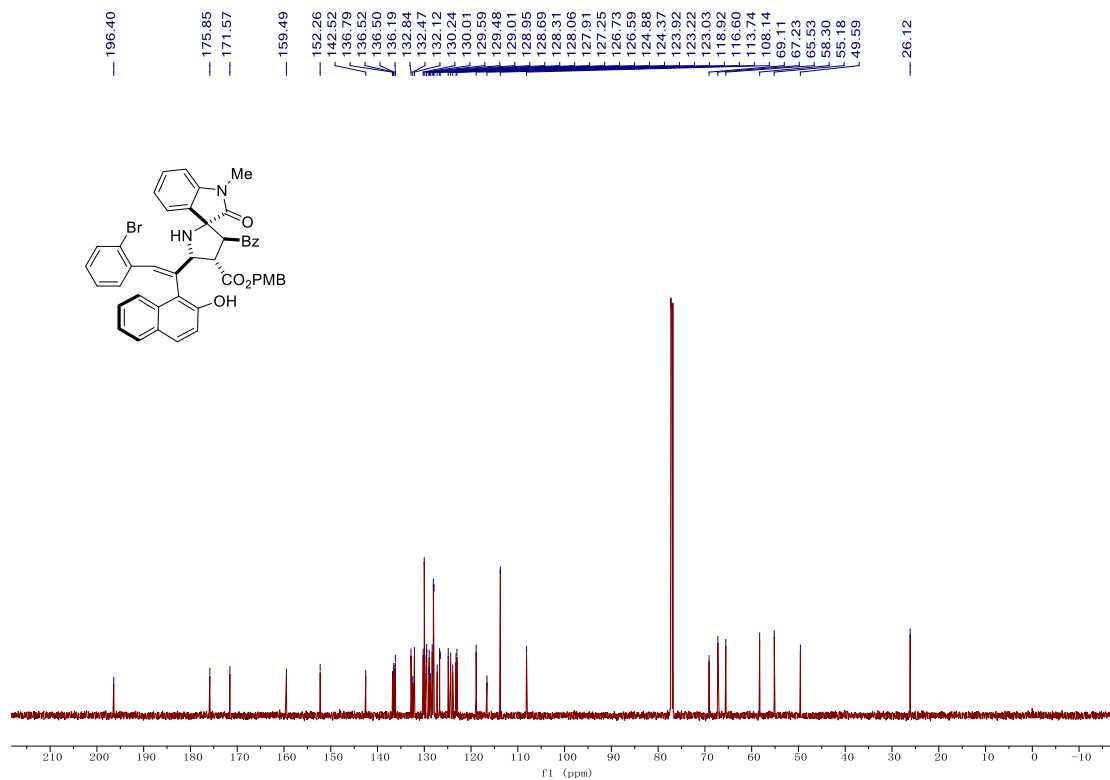

11j

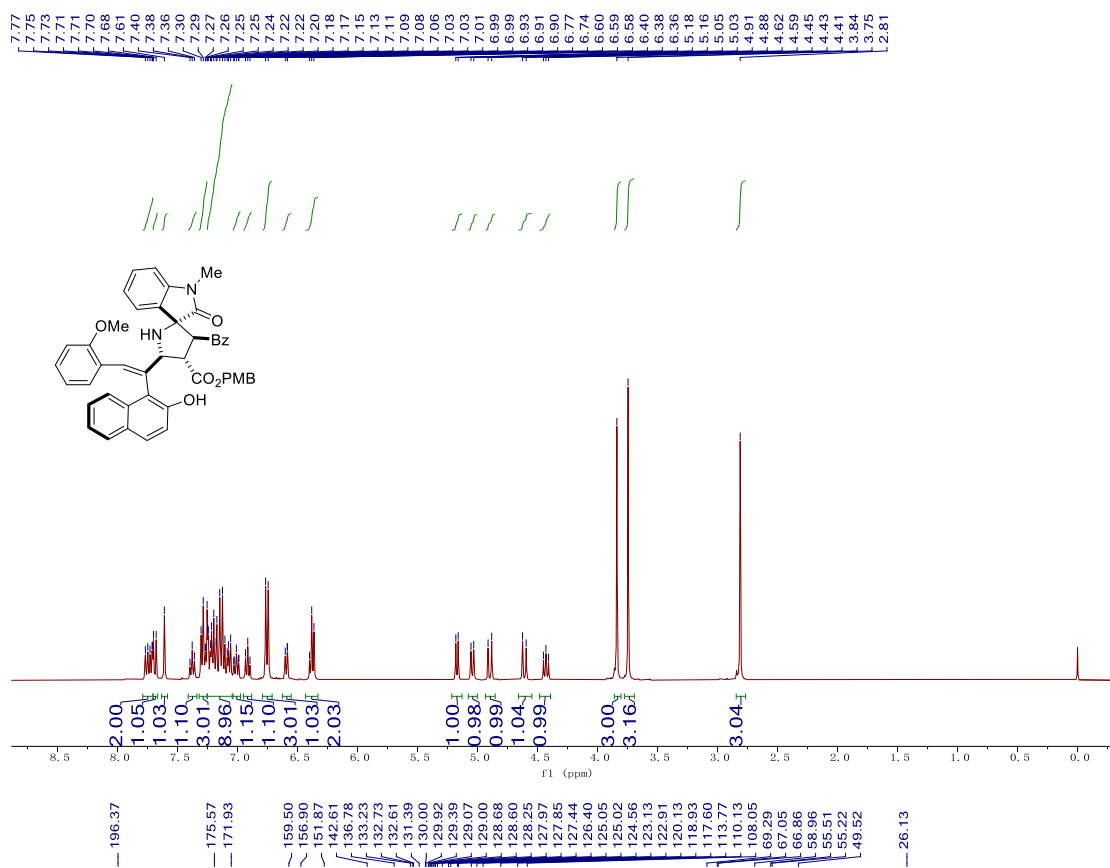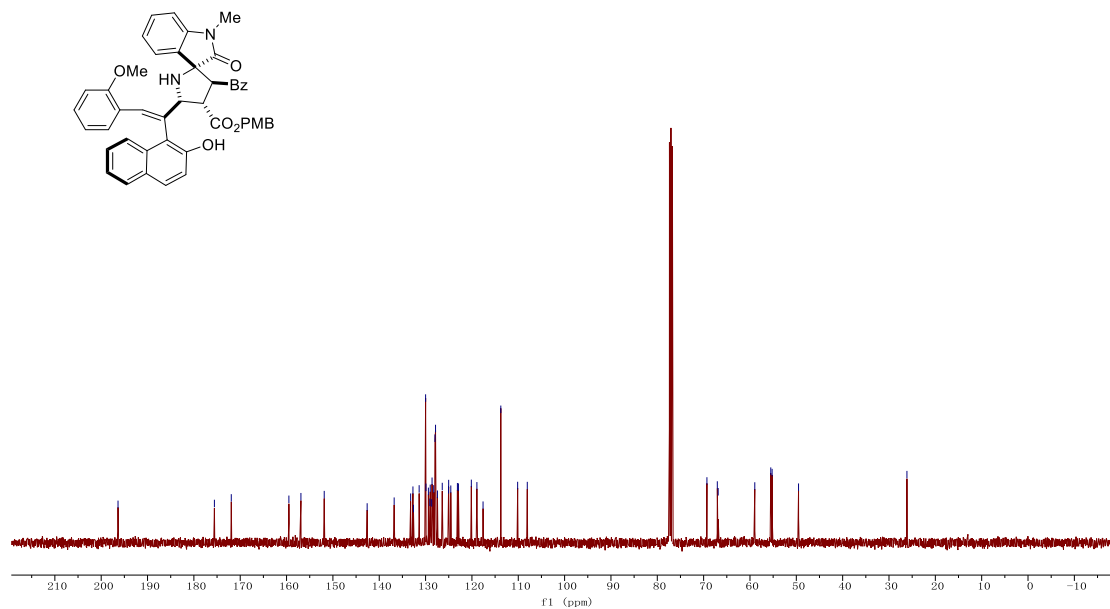



11k

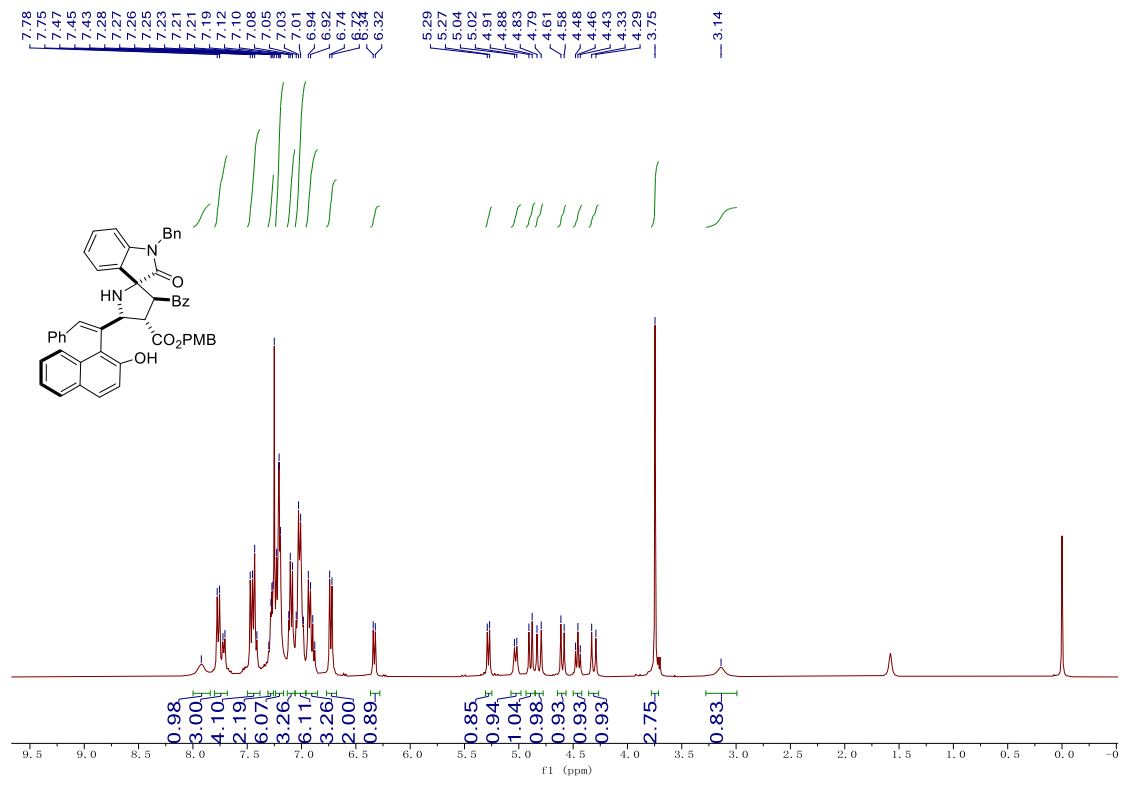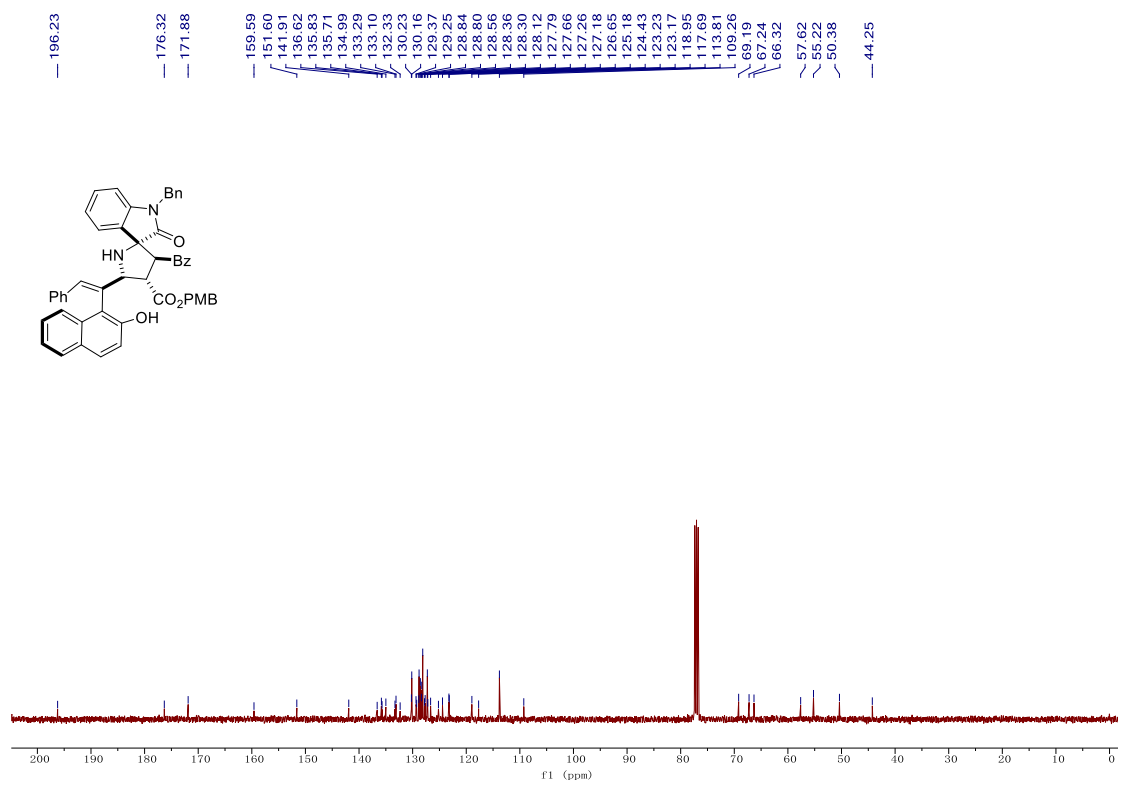

12a

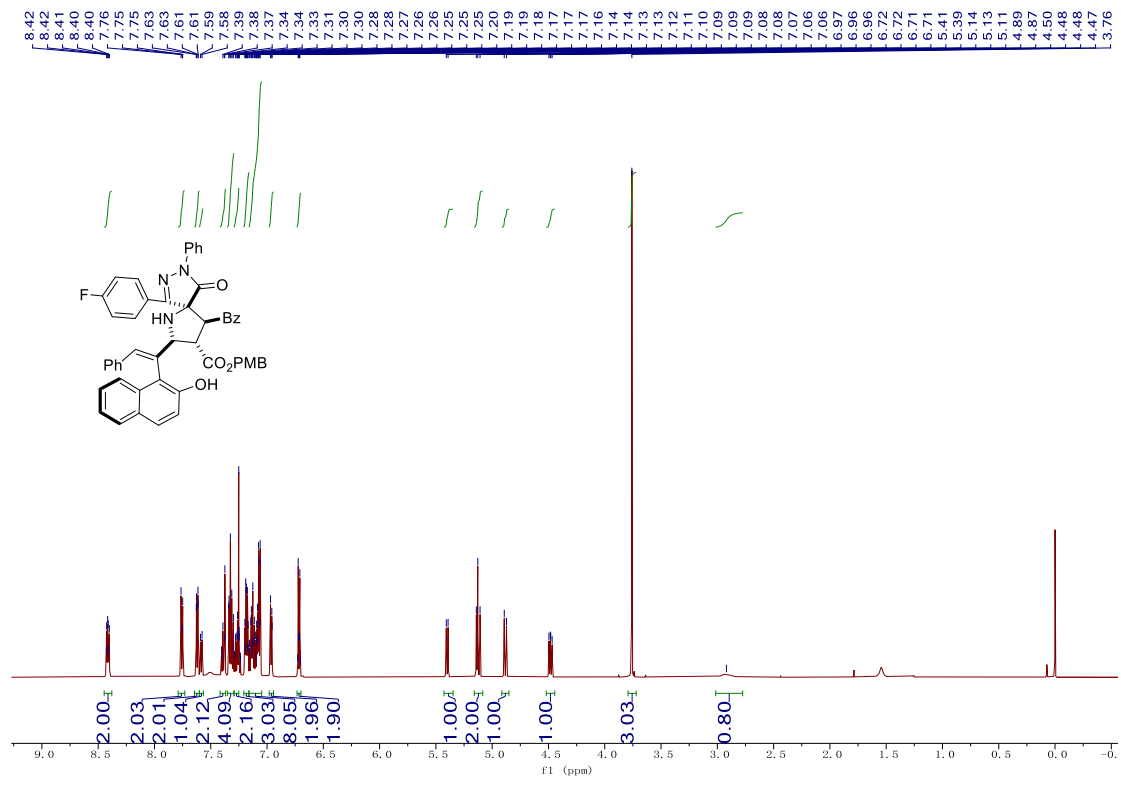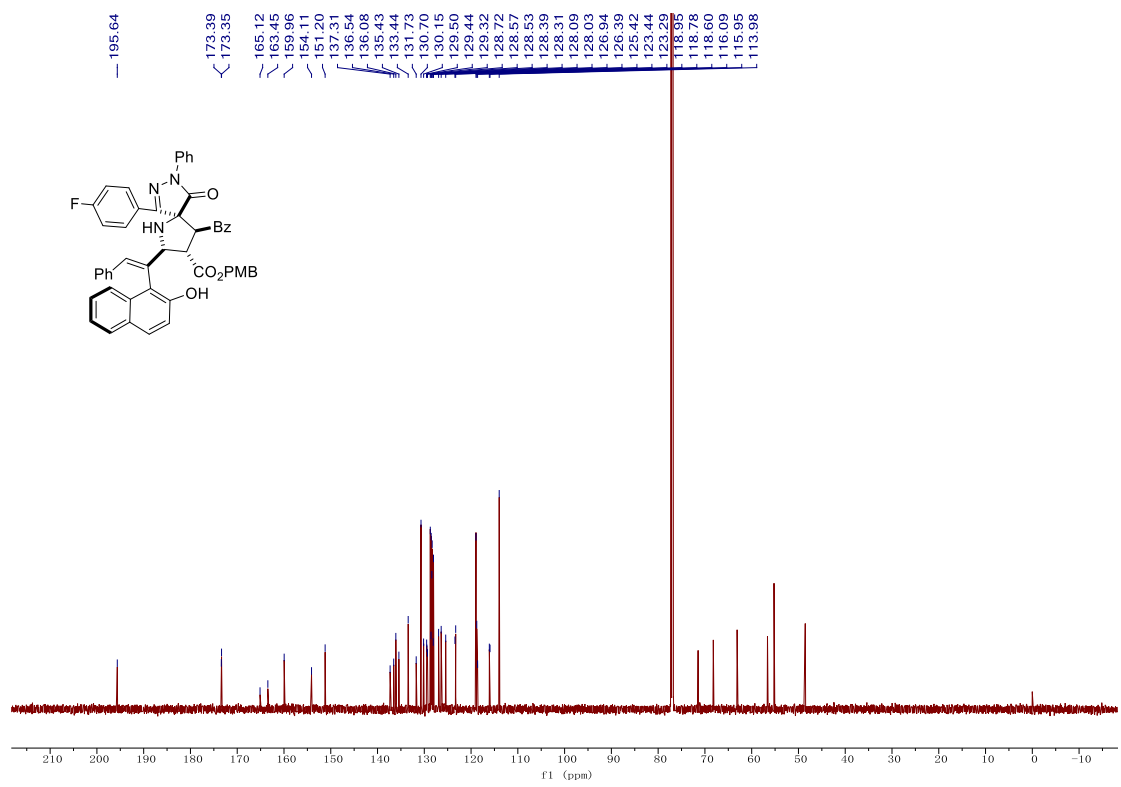

12b

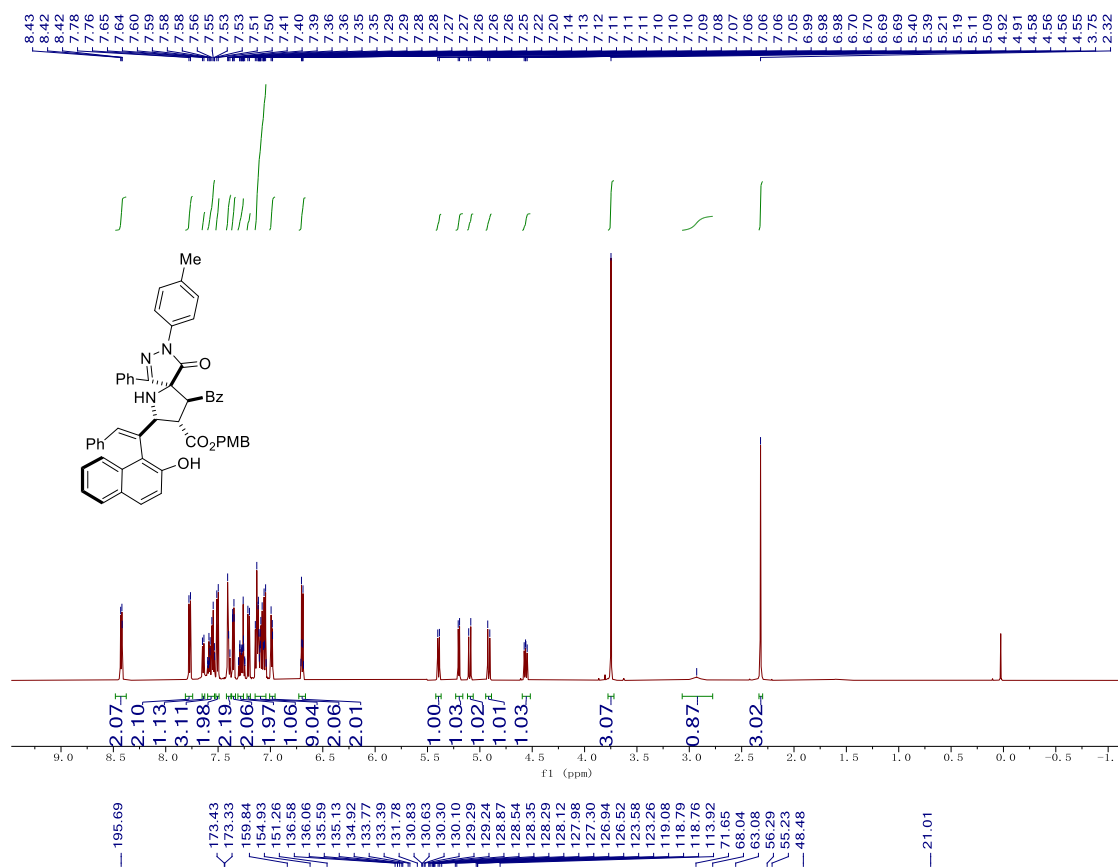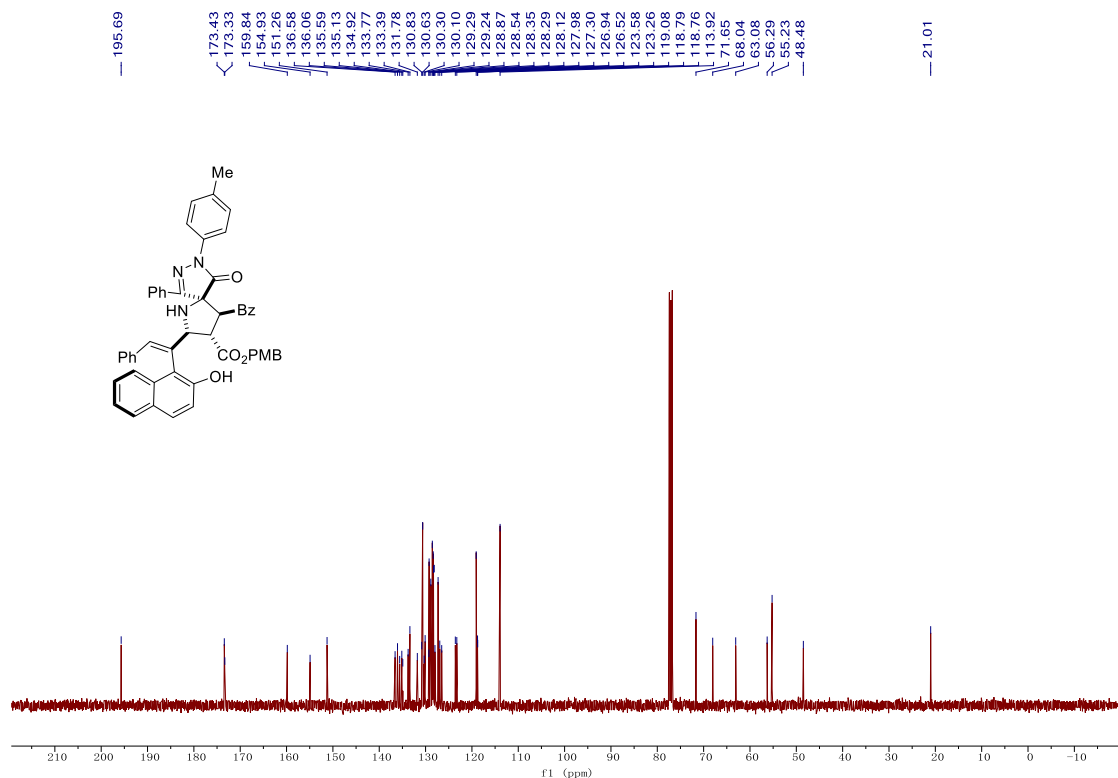

12c

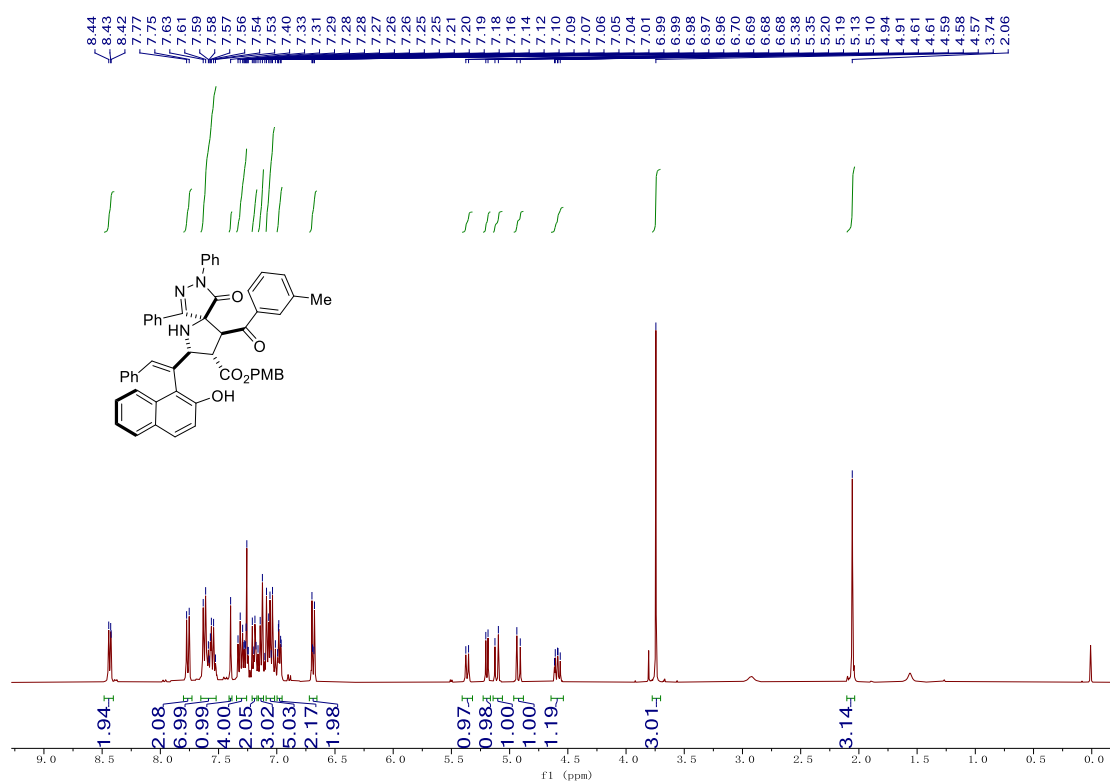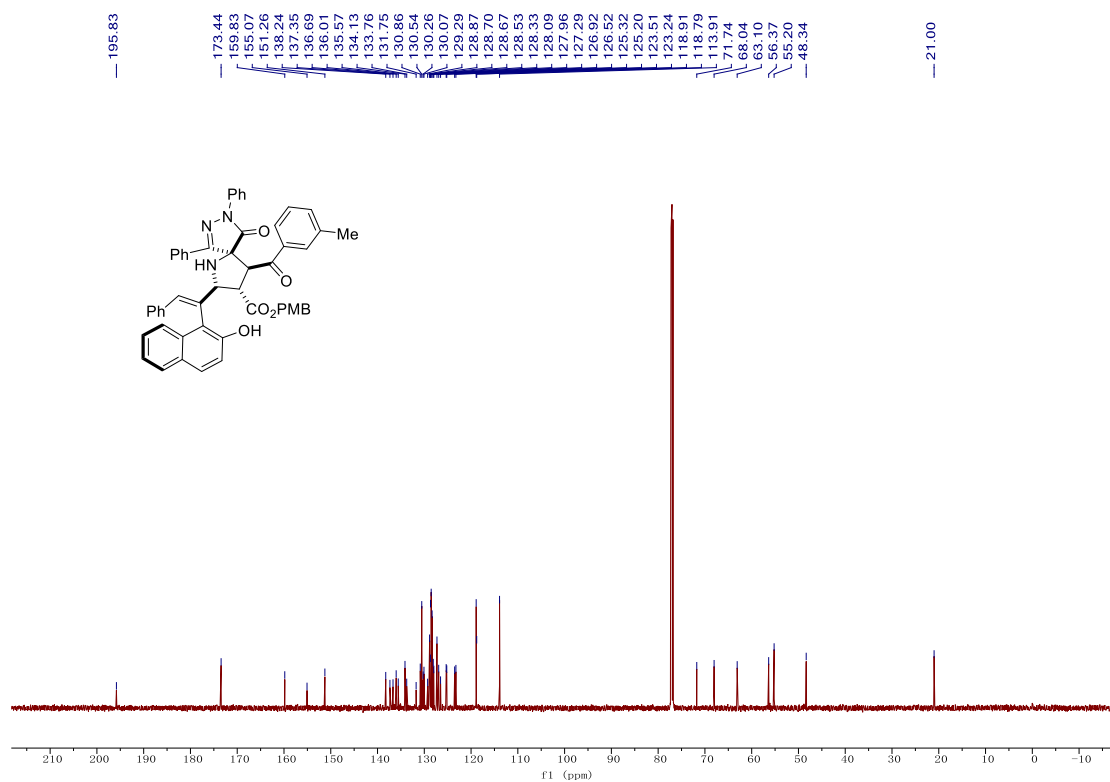

12d

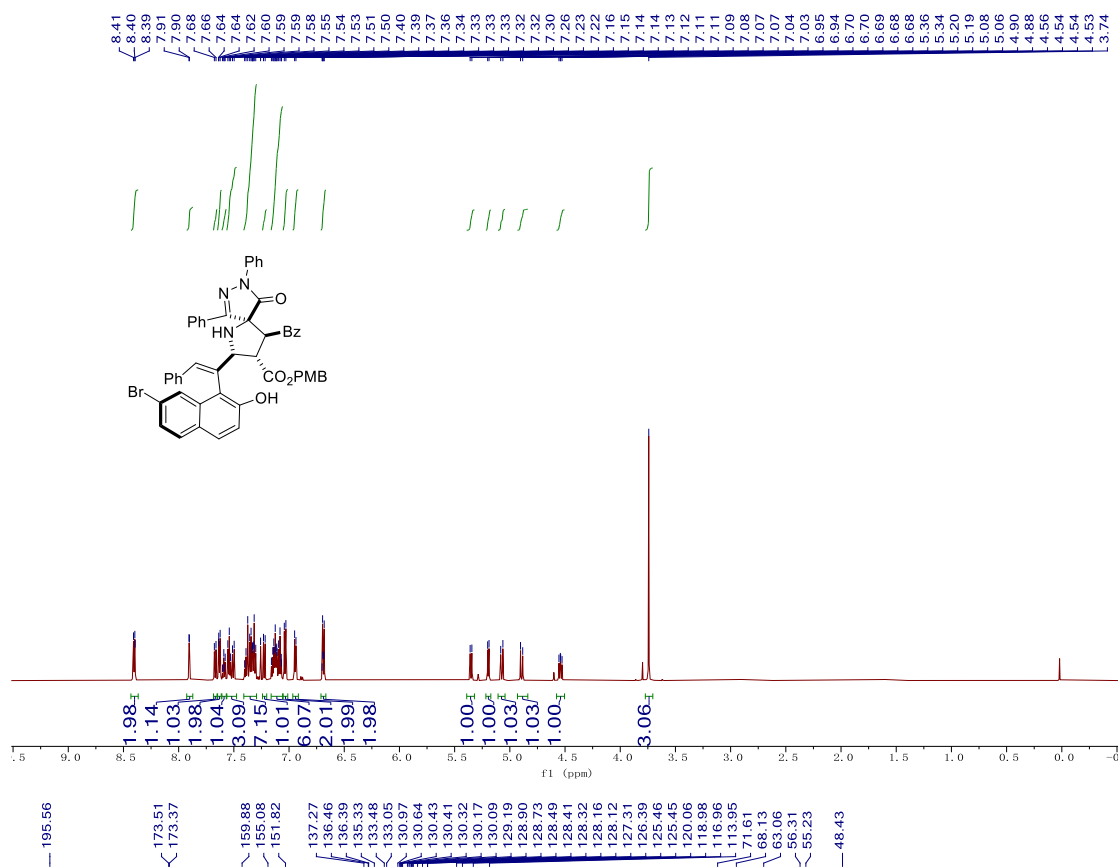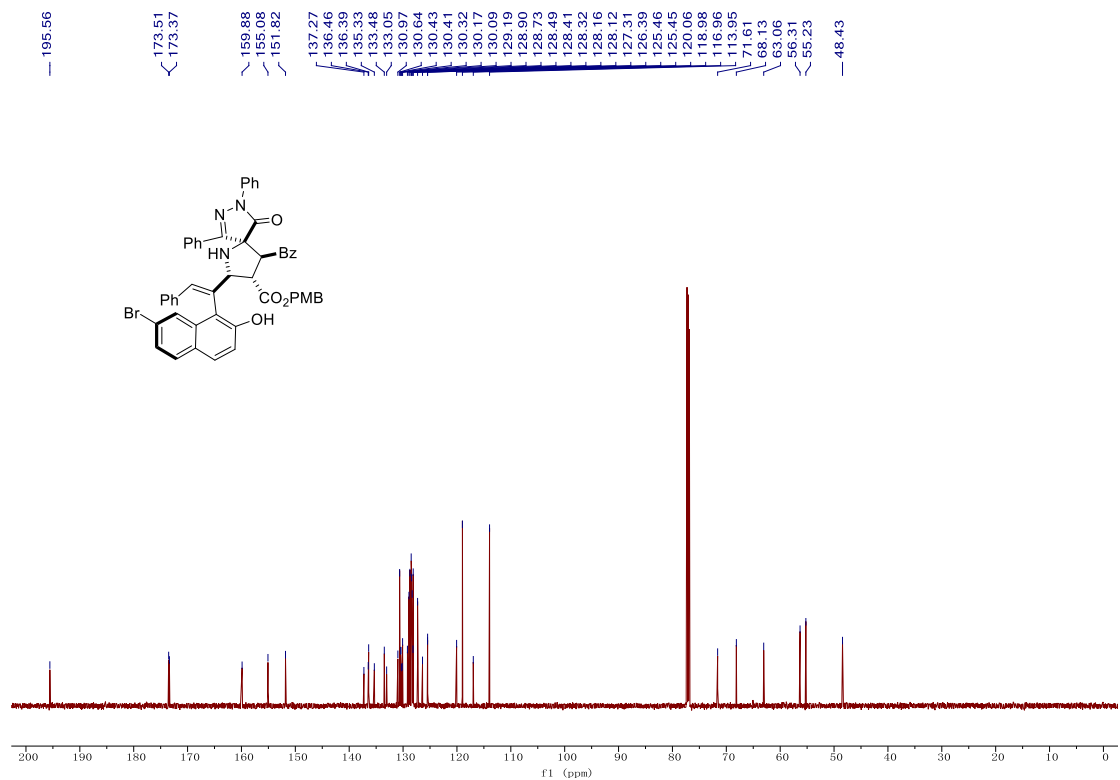

## 8. X-ray crystal structure of 3ba and 5ba

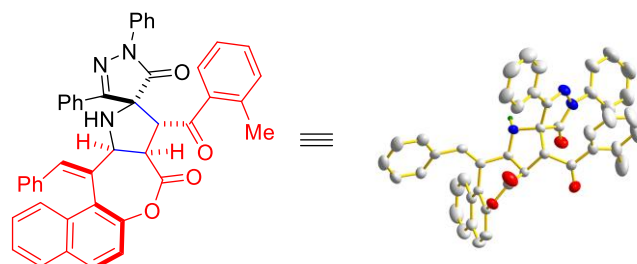

X-ray crystal structure of **3ba**

CCDC: 2234269

|                                             |                                                               |
|---------------------------------------------|---------------------------------------------------------------|
| Identification code                         | 1                                                             |
| Empirical formula                           | C <sub>45</sub> H <sub>33</sub> N <sub>3</sub> O <sub>4</sub> |
| Formula weight                              | 679.74                                                        |
| Temperature/K                               | 296.0                                                         |
| Crystal system                              | triclinic                                                     |
| Space group                                 | P-1                                                           |
| a/Å                                         | 9.5254(9)                                                     |
| b/Å                                         | 11.8656(11)                                                   |
| c/Å                                         | 17.5066(16)                                                   |
| α/°                                         | 86.314(2)                                                     |
| β/°                                         | 80.905(2)                                                     |
| γ/°                                         | 81.884(2)                                                     |
| Volume/Å <sup>3</sup>                       | 1932.4(3)                                                     |
| Z                                           | 2                                                             |
| ρ <sub>calc</sub> /cm <sup>3</sup>          | 1.168                                                         |
| μ/mm <sup>-1</sup>                          | 0.075                                                         |
| F(000)                                      | 712.0                                                         |
| Crystal size/mm <sup>3</sup>                | 0.26 × 0.23 × 0.21                                            |
| Radiation                                   | MoKα (λ = 0.71073)                                            |
| 2θ range for data collection/°              | 4.28 to 49.996                                                |
| Index ranges                                | -11 ≤ h ≤ 11, -13 ≤ k ≤ 14, -20 ≤ l ≤ 20                      |
| Reflections collected                       | 25538                                                         |
| Independent reflections                     | 6696 [R <sub>int</sub> = 0.0548, R <sub>sigma</sub> = 0.0550] |
| Data/restraints/parameters                  | 6696/432/536                                                  |
| Goodness-of-fit on F <sup>2</sup>           | 1.094                                                         |
| Final R indexes [I >= 2σ (I)]               | R <sub>1</sub> = 0.0770, wR <sub>2</sub> = 0.2227             |
| Final R indexes [all data]                  | R <sub>1</sub> = 0.1104, wR <sub>2</sub> = 0.2382             |
| Largest diff. peak/hole / e Å <sup>-3</sup> | 0.29/-0.26                                                    |

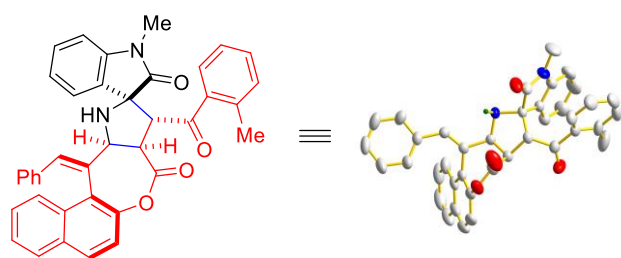

X-ray crystal structure of **5ba**

CCDC: 2286710

|                                             |                                                               |
|---------------------------------------------|---------------------------------------------------------------|
| Identification code                         | 1                                                             |
| Empirical formula                           | C <sub>39</sub> H <sub>30</sub> N <sub>2</sub> O <sub>4</sub> |
| Formula weight                              | 590.65                                                        |
| Temperature/K                               | 263.0                                                         |
| Crystal system                              | monoclinic                                                    |
| Space group                                 | P2 <sub>1</sub> /c                                            |
| a/Å                                         | 13.0367(14)                                                   |
| b/Å                                         | 15.1484(18)                                                   |
| c/Å                                         | 17.888(2)                                                     |
| α/°                                         | 90                                                            |
| β/°                                         | 96.818(3)                                                     |
| γ/°                                         | 90                                                            |
| Volume/Å <sup>3</sup>                       | 3507.6(7)                                                     |
| Z                                           | 4                                                             |
| ρ <sub>calc</sub> /cm <sup>3</sup>          | 1.118                                                         |
| μ/mm <sup>-1</sup>                          | 0.073                                                         |
| F(000)                                      | 1240.0                                                        |
| Crystal size/mm <sup>3</sup>                | 0.28 × 0.26 × 0.23                                            |
| Radiation                                   | MoKα (λ = 0.71073)                                            |
| 2θ range for data collection/°              | 4.138 to 50                                                   |
| Index ranges                                | -15 ≤ h ≤ 15, -18 ≤ k ≤ 18, -21 ≤ l ≤ 21                      |
| Reflections collected                       | 48750                                                         |
| Independent reflections                     | 6146 [R <sub>int</sub> = 0.0489, R <sub>sigma</sub> = 0.0272] |
| Data/restraints/parameters                  | 6146/66/412                                                   |
| Goodness-of-fit on F <sup>2</sup>           | 1.088                                                         |
| Final R indexes [I >= 2σ (I)]               | R <sub>1</sub> = 0.0748, wR <sub>2</sub> = 0.2397             |
| Final R indexes [all data]                  | R <sub>1</sub> = 0.0919, wR <sub>2</sub> = 0.2512             |
| Largest diff. peak/hole / e Å <sup>-3</sup> | 0.62/-0.34                                                    |
